# Supplementary material for: Eed controls craniofacial osteoblast differentiation and mesenchymal proliferation from the neural crest
Source: eLife. 2025 Dec 2;13:RP100159. doi: 10.7554/eLife.100159 (PMC12671911; doi:10.7554/eLife.100159)
Supplement: Supplementary file 1. [file elife-100159-supp1.xlsx]

## Sheet: Supplementary_File_1
Supplementary File 1. Cell count per embryo and per cell cluster from single-cell RNA sequencing.
cluster	TC_mEed_E125_WT1	TC_mEed_E125_WT2	TC_mEed_E125_WT3	TC_mEed_E125_KO1	TC_mEed_E125_KO2	TC_mEed_E125_KO3	Total
0	2680	2679	1699	1170	1311	1508	11047
1	1149	1098	730	1000	1136	1316	6429
2	1005	1057	780	1010	1068	1211	6131
3	868	834	579	660	990	1147	5078
4	386	281	229	884	1064	1180	4024
5	631	576	399	671	935	776	3988
6	570	644	291	464	906	752	3627
7	719	787	449	347	448	560	3310
8	565	575	371	412	590	555	3068
9	225	283	336	572	278	311	2005
10	380	362	214	261	350	291	1858
11	286	322	182	234	343	328	1695
12	293	416	191	204	273	303	1680
13	280	242	158	223	291	306	1500
14	223	262	175	197	269	247	1373
15	208	188	189	251	214	234	1284
16	170	231	160	141	236	162	1100
17	174	176	96	163	226	252	1087
18	156	149	93	237	174	163	972
19	129	103	74	126	129	173	734
20	88	85	40	103	98	99	513
21	55	49	51	89	112	111	467
22	72	94	54	39	98	57	414
23	65	41	52	70	45	73	346
Total	11377	11534	7592	9528	11584	12115	63730
