# Supplementary material for: Eed controls craniofacial osteoblast differentiation and mesenchymal proliferation from the neural crest
Source: eLife. 2025 Dec 2;13:RP100159. doi: 10.7554/eLife.100159 (PMC12671911; doi:10.7554/eLife.100159)
Supplement: Supplementary file 2. [file elife-100159-supp2.xlsx]

## Sheet: Supplementary_File_2
Supplementary File 2. Single-cell RNA sequencing cluster marker genes.
p_val	avg_log2FC	cluster	gene
0	2.16829	0	Hpse2
0	1.51194	0	Runx2
0	1.36888	0	Prrx1
0	1.35813	0	Trps1
0	1.35013	0	Hmcn1
0	1.27857	0	Fbxl7
0	1.22287	0	Cped1
0	1.19142	0	Slit3
0	1.18519	0	Palld
0	1.16254	0	Arhgap24
0	1.14491	0	Fbn2
0	1.14215	0	Alx1
0	1.13036	0	Prr16
0	1.11265	0	Sema3a
0	1.09681	0	Samd4
0	1.08502	0	Bnc2
0	1.07944	0	Col25a1
0	1.07607	0	Kif26b
0	1.07491	0	Fstl1
0	1.06524	0	Ror1
0	1.04964	0	Gpc3
0	1.03124	0	Cdh11
0	1.0275	0	Hmga2
0	1.02644	0	Cald1
1.43311650216377e-242	1.26429	0	Mecom
0	4.27578	1	Nrxn3
0	3.08701	1	Dlx6os1
0	3.03735	1	Sox2ot
0	2.85884	1	Adarb2
0	2.68282	1	Nxph1
0	2.55877	1	Gad2
0	2.49653	1	Erbb4
0	1.99208	1	Syt1
0	1.97286	1	Sntg1
0	1.95967	1	Grik2
0	1.89578	1	Grm5
0	1.87861	1	Gria4
0	1.86722	1	Nrg3
0	1.86434	1	Dpp10
0	1.84327	1	Celf4
0	1.77332	1	Fam155a
0	1.76901	1	Xkr4
0	1.70907	1	Runx1t1
0	1.69712	1	Anks1b
0	1.69244	1	Fgf14
0	1.68031	1	Zfp804a
0	1.67917	1	Arx
0	1.65595	1	Dscaml1
0	1.65498	1	Ctnna2
0	1.63863	1	Frmd5
0	2.33813	2	Tmem163
0	2.31082	2	Nrxn1
0	2.13827	2	Fam155a
0	2.10607	2	Nrg3
0	2.09426	2	Cntnap2
0	2.0754	2	Dcc
0	2.02596	2	Cacna2d1
0	2.00975	2	Rmst
0	1.99414	2	Ralyl
0	1.92306	2	Lsamp
0	1.90574	2	March1
0	1.84869	2	Tubb3
0	1.80379	2	C130073E24Rik
0	1.78922	2	Lhx9
0	1.78424	2	Sgcz
0	1.7568	2	Ncam2
0	1.74407	2	Rtn1
0	1.73608	2	Snhg11
0	1.73197	2	Reln
0	1.72895	2	Celf4
0	1.72349	2	Stmn2
0	1.71556	2	Nova1
0	1.68608	2	Tenm2
0	1.6835	2	Akap6
8.73717653490973e-287	1.7289	2	Schip1
0	2.84473	3	Fabp7
0	2.4421	3	Adgrv1
0	1.96803	3	Ptprz1
0	1.93195	3	Gm29260
0	1.90699	3	Ckb
0	1.76983	3	Sox2
0	1.7041	3	Slc35f1
0	1.66693	3	Rfx4
0	1.65473	3	Sox2ot
0	1.58161	3	Shroom3
0	1.57708	3	Hmgb2
0	1.55912	3	Dach1
0	1.52885	3	Cenpf
0	1.46346	3	Dbi
0	1.45376	3	Top2a
0	1.4252	3	Npas3
0	1.40923	3	Sema5b
0	1.39179	3	Tox3
0	1.38583	3	Mir99ahg
0	1.37191	3	Zbtb20
0	1.35027	3	Fut9
0	1.34774	3	Pantr1
0	1.34069	3	Sox1ot
0	1.30649	3	Nckap5
3.79596094454037e-269	1.32993	3	Egfem1
0	2.03279	4	Igf1
0	1.94858	4	Airn
0	1.91993	4	Plagl1
0	1.81228	4	Ptn
0	1.7303	4	Ebf2
0	1.71049	4	Dlk1
0	1.6664	4	Gas2
0	1.64039	4	Angptl1
0	1.61349	4	Itm2a
0	1.5519	4	Igfbp5
0	1.53242	4	Rtl4
0	1.53012	4	Piezo2
0	1.51191	4	Col6a3
0	1.50971	4	Bicc1
0	1.50513	4	Postn
0	1.5004	4	Egfl6
0	1.47738	4	Ldlrad4
0	1.43878	4	Egfr
0	1.43776	4	Col3a1
0	1.3856	4	Zfp385b
0	1.3853	4	Gpc3
0	1.38243	4	Igf2r
0	1.36676	4	Abi3bp
0	1.35708	4	Tshz2
0	1.33464	4	Mest
0	2.86396	5	Col1a1
0	2.59546	5	Col1a2
0	2.43439	5	Col3a1
0	2.39247	5	Dcn
0	2.17236	5	Lum
0	2.06944	5	Dlk1
0	2.02131	5	Il1rapl2
0	1.91285	5	Sfrp2
0	1.8702	5	Sparc
0	1.83673	5	Lgals1
0	1.82195	5	Col12a1
0	1.80255	5	Col5a2
0	1.69658	5	Egfl6
0	1.67262	5	Tmem132c
0	1.64433	5	Gxylt2
0	1.61726	5	S100a10
0	1.59541	5	Akap12
0	1.57954	5	Fbn2
0	1.56781	5	Col14a1
0	1.56149	5	Adamtsl1
0	1.55339	5	Tbx15
0	1.55045	5	Lox
0	1.54536	5	Crabp1
0	1.5332	5	Tgfbr3
0	1.53202	5	Col5a1
0	2.92454	6	Neurod6
0	2.87952	6	Plxna4
0	2.64172	6	Epha5
0	2.55497	6	Ppp2r2b
0	2.48361	6	Nrg1
0	2.48322	6	Ccser1
0	2.4646	6	Epha3
0	2.45083	6	Unc5d
0	2.32185	6	Neurod2
0	2.26231	6	Sorbs2
0	2.2056	6	Nkain3
0	2.08578	6	Kcnq3
0	2.02978	6	Nfib
0	2.01518	6	Lrfn5
0	2.00115	6	E130114P18Rik
0	1.9956	6	Sox5
0	1.9875	6	Plxna2
0	1.98167	6	Sox11
0	1.9773	6	Foxg1
0	1.9604	6	Celf2
0	1.94903	6	C130071C03Rik
0	1.93603	6	Dcc
0	1.89151	6	Cacna2d1
0	1.88306	6	Bcl11a
0	1.88192	6	Igfbpl1
0	2.51284	7	Top2a
0	2.27129	7	Pclaf
0	2.26672	7	Diaph3
0	2.21248	7	Ube2c
0	2.10518	7	Hist1h1b
0	2.07788	7	Birc5
0	2.05291	7	Mki67
0	2.02404	7	Cenpe
0	1.99349	7	Cks2
0	1.98952	7	Cenpf
0	1.9447	7	H2afx
0	1.92281	7	Hmgb2
0	1.91001	7	Tpx2
0	1.90969	7	Cenpa
0	1.90778	7	Kif11
0	1.88764	7	Hist1h2ap
0	1.81711	7	Nusap1
0	1.78102	7	Cenpp
0	1.76247	7	Cdk1
0	1.76061	7	Prc1
0	1.69469	7	Kif15
0	1.66859	7	Hmmr
0	1.6623	7	Smc2
0	1.6492	7	Smc4
0	1.5821	7	Knl1
0	3.11822	8	Krt15
0	2.98685	8	Krt14
0	2.86228	8	Epcam
0	2.6008	8	Krt5
0	2.45854	8	Sfn
0	2.44967	8	Dsp
0	2.29544	8	Perp
0	2.21088	8	Cxcl14
0	2.12678	8	Lmo7
0	2.08574	8	Klf5
0	2.0502	8	Ptpn13
0	2.0299	8	Atf3
0	2.01915	8	Cdh1
0	2.0113	8	2610035D17Rik
0	1.94359	8	Map7
0	1.92829	8	Elf1
0	1.91089	8	Dennd2c
0	1.87881	8	Mt1
0	1.7419	8	Hspb1
0	1.68166	8	Spint2
0	1.66486	8	Esrp1
0	1.66455	8	Ikzf2
0	1.66322	8	Etl4
0	1.61283	8	Hspa1b
0	1.57396	8	Fras1
0	9.32262	9	Hbb-bs
0	9.308	9	Hbb-y
0	8.8966	9	Hba-a1
0	8.61912	9	Hba-a2
0	8.39642	9	Hbb-bt
0	7.77514	9	Hba-x
0	4.23824	9	Hbb-bh1
0	3.58649	9	Fth1
0	3.25056	9	Nudt4
0	2.76626	9	Car2
0	2.6906	9	Bpgm
0	2.58621	9	Alas2
0	2.5266	9	Snca
0	2.51438	9	Gpx1
0	2.06938	9	Blvrb
0	2.05573	9	Kel
0	2.00404	9	Tent5c
0	1.93389	9	Creg1
0	1.9009	9	Ftl1
0	1.88285	9	Mkrn1
0	1.85058	9	Slc4a1
0	1.75934	9	Ube2l6
0	1.7293	9	Slc25a37
0	1.66913	9	Gclm
0	1.65706	9	Pdzk1ip1
0	4.90121	10	Col2a1
0	4.2336	10	Hapln1
0	4.19487	10	Col9a1
0	4.10484	10	Col11a1
0	3.99011	10	Col9a3
0	3.74898	10	Matn1
0	3.47182	10	Col9a2
0	3.41175	10	Matn4
0	3.32777	10	Acan
0	3.07504	10	Cnmd
0	3.06064	10	Kcnq5
0	3.02182	10	Mia
0	2.82666	10	Col11a2
0	2.79705	10	Col27a1
0	2.59953	10	Cytl1
0	2.41869	10	Sox9
0	2.36578	10	Papss2
0	2.23281	10	Cthrc1
0	2.21134	10	Sox6
0	2.11163	10	Wwp2
0	2.03498	10	Neat1
0	1.98271	10	Bmp6
0	1.96477	10	Errfi1
0	1.96182	10	Xylt1
0	1.93915	10	H19
0	2.61598	11	Akap12
0	2.37113	11	Slc1a3
0	2.31789	11	Col4a1
0	2.26165	11	Dcn
0	2.23806	11	Vtn
0	2.21489	11	S100a6
0	2.1908	11	Gja1
0	2.16983	11	Ranbp3l
0	2.04707	11	Igfbp2
0	1.97566	11	Cxcl12
0	1.96896	11	Col4a2
0	1.95762	11	Rbp1
0	1.95553	11	Col3a1
0	1.92525	11	Slc2a13
0	1.89423	11	Adam12
0	1.87387	11	Colec12
0	1.8731	11	Lum
0	1.85001	11	Stk39
0	1.82201	11	Gmds
0	1.81905	11	Atp1a2
0	1.80199	11	Adamts12
0	1.77684	11	Cldn11
0	1.77646	11	Bmp6
6.5710470396527e-237	2.06946	11	Mpp7
3.10713682696105e-181	3.10894	11	Trpm3
0	1.34231	12	Hmgb2
0	1.28296	12	H2afz
0	1.07345	12	Cks2
0	1.01121	12	Ppia
0	0.993329	12	Hmgb1
0	0.873622	12	Rps26
0	0.858719	12	Ptma
0	0.821534	12	Pclaf
1.13517010449586e-267	1.19795	12	Ube2c
1.24231635132995e-248	0.972826	12	Ran
2.08082052186577e-231	1.01271	12	Hmgn2
3.12135704299332e-218	1.23171	12	Dbi
1.06899254616839e-208	0.916559	12	H2afx
4.33175837985687e-191	0.897281	12	Ranbp1
4.25270743593236e-190	0.83158	12	H2afv
7.47620539321092e-190	0.872057	12	Gapdh
1.27358917112189e-180	1.41855	12	Gm42418
1.6666589475355e-177	0.848708	12	Mif
2.82974286211412e-163	0.90069	12	Tuba1b
2.8597780825789e-148	0.902809	12	Tubb4b
1.44267823379772e-147	0.818134	12	Ube2s
6.34605641438078e-123	0.930334	12	Ckb
2.37418964454957e-113	0.806293	12	H1fx
8.41419234095775e-91	2.08952	12	Fabp7
3.59353704246723e-40	0.816337	12	AY036118
0	3.46573	13	Zfpm2
0	3.43256	13	Dscam
0	3.07776	13	Nrxn3
0	3.00913	13	Cntnap2
0	2.83202	13	Otx2os1
0	2.74574	13	Nxph1
0	2.63184	13	Nav2
0	2.42786	13	Gata3
0	2.40692	13	Rab3c
0	2.33634	13	Otx2
0	2.27666	13	Lhx1
0	2.26949	13	Adarb2
0	2.2652	13	Gad2
0	2.19479	13	St18
0	2.18376	13	Thsd7a
0	2.00743	13	Gad1
0	1.98038	13	Cacna2d3
0	1.89101	13	Syt1
0	1.89057	13	Pnoc
0	1.82703	13	Grid2
0	1.79832	13	Ndst3
9.80763417796202e-257	2.17976	13	Hs6st3
3.35189796865755e-188	1.84882	13	Ntm
4.54008949620621e-167	2.20249	13	Tfap2b
3.49571983062366e-93	1.90939	13	Tenm3
0	2.09295	14	Tuba1a
0	1.91946	14	Tubb2b
0	1.82012	14	Tubb3
0	1.76905	14	Stmn1
0	1.7534	14	Stmn3
0	1.69356	14	Tmsb10
0	1.65753	14	Nnat
0	1.64196	14	Stmn2
0	1.42505	14	Rtn1
0	1.42376	14	Uchl1
0	1.4028	14	Mllt11
0	1.38531	14	Tubb2a
0	1.36869	14	Tubb5
0	1.32707	14	Tagln3
3.0086950006559e-299	1.42384	14	Gap43
2.98415229838413e-221	1.24188	14	Gm1673
9.94025044698374e-203	1.61079	14	mt-Cytb
5.13788419710514e-187	1.62901	14	mt-Co3
6.11485751510593e-186	1.60547	14	mt-Nd4
9.19558919816345e-186	1.62533	14	mt-Atp6
7.35007333903174e-184	1.58157	14	mt-Co2
2.6474650223111e-143	1.53715	14	mt-Nd1
5.64655430233687e-139	1.4203	14	mt-Co1
8.73562421582215e-129	1.58416	14	mt-Nd2
8.2411758877983e-120	1.33118	14	mt-Nd3
0	5.30495	15	Actc1
0	4.90181	15	Ttn
0	4.37708	15	Mylpf
0	3.82106	15	Acta2
0	3.70918	15	Myog
0	3.66176	15	Tnnt1
0	3.4368	15	Myl1
0	3.37361	15	Acta1
0	3.27395	15	Neb
0	3.17316	15	Tpm2
0	2.99679	15	Myh3
0	2.8451	15	Myl4
0	2.83176	15	Tnnc1
0	2.54981	15	Tnni1
0	2.51102	15	Nrk
0	2.4979	15	Gm28653
0	2.49596	15	Tnnt2
0	2.38853	15	Cdkn1c
0	2.29814	15	Tnnc2
0	2.27595	15	Ccdc141
0	2.15534	15	Rbm24
0	2.14973	15	Chrm3
0	2.06354	15	Cryab
0	2.05226	15	Parm1
0	2.04246	15	Eya4
0	3.41553	16	Cdh5
0	3.17227	16	Emcn
0	3.16338	16	Flt1
0	3.0383	16	Cldn5
0	2.9428	16	Pecam1
0	2.89448	16	Kdr
0	2.77159	16	Ptprb
0	2.67071	16	Cyyr1
0	2.66759	16	Col4a1
0	2.49957	16	Ramp2
0	2.48001	16	Cd93
0	2.4286	16	Gng11
0	2.39315	16	Col4a2
0	2.3767	16	Col18a1
0	2.33614	16	Slc2a1
0	2.31029	16	Sparcl1
0	2.29622	16	Adgrl4
0	2.25291	16	Prex2
0	2.25161	16	Esam
0	2.2469	16	Arhgap18
0	2.22573	16	Adgrf5
0	2.21543	16	Ptprm
0	2.19593	16	Tagln2
0	2.15172	16	Fli1
0	2.13612	16	Egfl7
0	4.04125	17	Rnf220
0	3.41245	17	Ntng1
0	3.22783	17	Tcf7l2
0	2.95977	17	Tenm2
0	2.55518	17	Egfem1
0	2.39313	17	Grm8
0	2.3835	17	Shisa9
0	2.2435	17	Gbx2
0	2.16173	17	Syt13
0	2.15281	17	Gm26871
0	2.15199	17	Lhx9
0	2.15029	17	Pou2f2
0	2.11537	17	Nrxn1
0	2.11508	17	Chl1
0	2.10372	17	Samd5
0	2.07651	17	Thsd7a
0	1.99686	17	Gap43
0	1.92997	17	Zic1
0	1.9079	17	Ank2
0	1.89885	17	Tubb3
0	1.81106	17	Lhx2
0	1.7916	17	Erc2
3.01177731889338e-220	1.92352	17	Dab1
3.19209115972514e-165	2.10702	17	Galntl6
2.49719827542988e-111	2.06031	17	Kirrel3
0	4.85996	18	Apoe
0	4.54316	18	Pf4
0	4.10033	18	Cxcl2
0	4.0608	18	Fcer1g
0	3.71666	18	Hmox1
0	3.70952	18	C1qc
0	3.69555	18	C1qb
0	3.61201	18	Ctsb
0	3.4649	18	Mrc1
0	3.43463	18	Tyrobp
0	3.41203	18	C1qa
0	3.3354	18	Lgmn
0	3.23198	18	Ccl4
0	3.13503	18	Selenop
0	3.01002	18	Tmsb4x
0	2.94194	18	Ctsd
0	2.94116	18	F13a1
0	2.93939	18	Cebpb
0	2.8991	18	Fyb
0	2.86319	18	Srgn
0	2.84353	18	Cd36
0	2.82172	18	Cd83
0	2.81691	18	Ctsc
0	2.80528	18	Mt1
0	2.76816	18	Plek
0	3.97811	19	Stard13
0	3.94748	19	Fabp7
0	3.74248	19	Ednrb
0	3.17653	19	Cdh19
0	2.75361	19	Dbi
0	2.71174	19	Plp1
0	2.66275	19	Sntb1
0	2.62147	19	Sorcs1
0	2.60859	19	Cdh6
0	2.41894	19	Adgrg6
0	2.29877	19	Deptor
0	2.24422	19	Dst
0	2.2162	19	Luzp2
0	2.18809	19	Mpz
0	2.12252	19	Fign
0	2.09087	19	Itga6
0	2.05996	19	Timp3
6.42520091880439e-305	2.02415	19	Zeb2
4.38112938586551e-297	2.27142	19	Grid2
4.13928370880155e-274	2.67236	19	Hspa1b
3.79770911405124e-273	2.25157	19	Il1rapl1
1.64345855696208e-265	2.71767	19	Hspa1a
3.95522339161579e-218	2.24337	19	Pdzrn3
8.82829842987064e-206	2.29968	19	Opcml
1.89049966511076e-173	2.529	19	Csmd1
0	5.05392	20	Rgs5
0	3.37081	20	Abcc9
0	3.09731	20	Col4a1
0	3.03528	20	Itga1
0	2.99968	20	Pde8b
0	2.88215	20	Igfbp7
0	2.78924	20	Vtn
0	2.59521	20	Col4a2
0	2.55495	20	Mmp9
0	2.55094	20	Gng11
0	2.49278	20	Uaca
0	2.25003	20	Gucy1b1
0	2.24464	20	Tagln2
0	2.18476	20	Ndufa4l2
0	2.12813	20	Atp1a2
0	2.10988	20	Morrbid
3.83348928743176e-280	2.22644	20	Cald1
1.00089789678479e-271	2.12672	20	Myh9
8.44105286366881e-241	2.38155	20	Dlc1
6.36885613709855e-240	2.22412	20	Pde3a
4.35883854541538e-208	3.02299	20	Acta2
6.87509832802963e-208	2.24201	20	Prkg1
1.55452713881851e-134	2.38844	20	Hspa1b
1.52759777633275e-130	2.39337	20	Hspa1a
5.17782774951815e-120	2.36116	20	Tagln
0	3.34848	21	Hoxb8
0	2.65186	21	Hoxa5
0	2.56886	21	Hoxb3
0	2.56605	21	Hoxb6
0	2.52324	21	Gfra1
0	2.42452	21	Lmx1b
0	2.35295	21	Hoxb5
0	2.26474	21	Tlx3
0	2.26271	21	Gm2694
1.20886548569115e-297	2.99065	21	Ebf3
9.20877923745849e-263	2.41672	21	Meis1
9.54115503259293e-250	2.39189	21	Tafa1
3.50390341738506e-239	3.33208	21	Lingo2
2.17495691059277e-231	2.18283	21	Plxna2
1.40713569953802e-228	2.5071	21	Fign
1.25064287191311e-225	2.24074	21	Ebf1
2.67605038049125e-221	2.9965	21	Tmeff2
5.02306862688671e-216	2.35195	21	Car10
2.1690507221921e-203	2.3569	21	Nav3
2.72120165281788e-193	2.51611	21	Erbb4
5.52660797968615e-163	2.32648	21	Hs3st5
6.96677587892112e-163	2.28429	21	Cntnap2
8.05889679818706e-155	2.27511	21	Plcb1
1.20674268698559e-123	2.52392	21	Spock3
8.69261785599948e-41	2.37495	21	Dlg2
0	4.37496	22	Fstl5
0	3.92709	22	Thsd7b
0	3.35508	22	Atf5
0	3.1259	22	Lhx2
0	2.86675	22	Atp8b4
0	2.66383	22	Arhgdig
0	2.3191	22	Rap1gap2
0	2.30451	22	Tesc
0	2.30386	22	Uncx
0	2.26667	22	Tpd52
0	2.24154	22	Epcam
3.2358947861905e-304	3.0475	22	Spock1
1.6263487476774e-297	3.31208	22	Ebf2
4.06263741190145e-289	3.0954	22	Cntn4
4.57249148423214e-263	2.21808	22	Kcnh8
5.75037409572916e-259	2.66792	22	Agbl4
3.02355256716682e-222	2.45939	22	Hs3st5
6.84941372173588e-201	2.83994	22	Med12l
1.04958470004688e-195	3.27244	22	Sdk1
3.53297120313043e-194	2.35539	22	Ebf3
2.99676810067272e-176	3.15801	22	Trpm3
9.85544446446764e-160	2.47361	22	Selenom
8.51048320670187e-158	3.22807	22	Tex15
1.29040635066591e-155	2.77314	22	Elavl4
1.06751453351434e-151	2.46894	22	Myt1l
0	9.28065	23	Ttr
0	5.1841	23	Htr2c
0	4.50611	23	Trpm3
0	3.87465	23	Slc6a15
0	2.98874	23	Lrriq1
0	2.97191	23	Clic6
0	2.86735	23	Frmpd4
0	2.75196	23	Kcne2
0	2.70361	23	Vat1l
0	2.59208	23	Gm29478
0	2.50424	23	Otx2os1
0	2.4206	23	Sostdc1
0	2.33144	23	Rbm47
0	2.32441	23	Cfap299
0	2.31765	23	Gmnc
1.26648836307553e-302	3.31383	23	Ezr
4.09247675534583e-287	2.49303	23	Slc16a10
2.67880209160148e-281	2.33089	23	Mlf1
2.21482015151751e-224	2.64938	23	Npnt
9.4350009261073e-189	3.00959	23	Zfp804b
2.59020180530927e-184	2.90817	23	Agbl4
1.45785857825232e-166	2.68493	23	Sulf1
4.47990979195687e-163	2.86976	23	Slc4a10
2.35901148274447e-146	2.35113	23	Igfbp2
7.82897030288633e-88	2.433	23	Esrrg
