# Supplementary material for: Eed controls craniofacial osteoblast differentiation and mesenchymal proliferation from the neural crest
Source: eLife. 2025 Dec 2;13:RP100159. doi: 10.7554/eLife.100159 (PMC12671911; doi:10.7554/eLife.100159)
Supplement: Supplementary file 3. [file elife-100159-supp3.xlsx]

## Sheet: Supplementary_File_3
Supplementary File 3. Differential gene expression between C4 and C0 from single-cell RNA sequencing.
gene	log_fc	padj
Ebf2	2.15497	5.75267584476982e-279
4930438E09Rik	2.12998	2.06152583867108e-132
Sox5	-2.58876	2.06152583867108e-132
Igf1	1.75646	8.18667939470483e-130
Plagl1	1.95557	5.77650036012109e-94
Col2a1	-2.81839	9.96393447258936e-88
Gnas	0.839459	1.93172500299432e-86
Cyp26b1	-2.1545	1.84265004120773e-83
Col9a3	-3.26291	2.44426298218075e-79
Sox6	-2.87874	3.44439909182536e-79
Hpse2	-2.80178	6.7117942707319e-78
Selenop	1.44544	2.31212555667137e-64
1700120O09Rik	2.14417	4.03727845620194e-63
Gm44593	-4.75794	7.40202839536667e-58
Ank3	1.16579	8.12170582100617e-58
Hic1	1.99074	8.25385047975229e-58
Irx5	-1.85631	2.56765515271687e-55
Ebf3	1.44863	7.36026424438868e-55
Lrriq1	-4.76073	9.61201142254064e-55
Wnt5a	-1.57309	2.37838661994771e-54
Irx3	-2.46877	2.46584067005015e-54
B830012L14Rik	1.13497	7.88470600523141e-53
Trpc5	2.0586	1.05010004189545e-51
Rtl4	1.7692	4.09221627304864e-49
Fam129a	2.05605	2.02042582009676e-47
Prokr2	2.49554	5.06205243299283e-46
Ntrk3	1.77748	1.02927704850317e-45
Eya1	-1.1963	2.1736960415128e-45
Pou3f4	-3.68663	5.08849738601402e-45
Bcl11b	-1.88177	5.65922697878208e-45
Lhfpl2	0.793636	2.40781175278506e-44
Rarres2	2.01446	3.36506105754348e-42
Rian	1.13054	4.39154558448007e-42
Ivns1abp	-0.681406	1.25153194639785e-41
Agtr2	2.11961	2.76830505582553e-41
Vgll3	-1.64719	5.48494428655942e-41
Mest	1.23993	7.33939413547368e-41
Meox1	2.38092	5.50280987366588e-40
Itga4	-1.85993	1.87036789568537e-39
Vwa5a	1.10002	2.03841821782501e-39
Rgs6	-1.69578	9.08074589102687e-39
Gm34517	-3.08615	1.50941337100619e-38
Angptl1	1.93979	3.22985047951778e-38
Meg3	1.30132	5.20901278176997e-38
Fbn1	0.789484	6.85316632821287e-38
Abcc9	2.06798	7.72542217793054e-38
Amot	1.42296	9.77654055371513e-38
Cntn5	-2.34642	1.45487554371363e-37
Nebl	-1.34935	1.64435115748646e-37
Ccdc80	0.895957	8.53560345514377e-36
Apcdd1	-2.18127	1.25780630738947e-35
Ibsp	-8.06169	4.94005569204324e-35
Ptch1	-0.887685	6.13247633252975e-35
Pax3	-2.28302	6.13247633252975e-35
Dgkk	1.9657	2.24291556821355e-34
Fibin	1.00286	2.24291556821355e-34
Sfrp1	0.737496	4.55302558596367e-34
Aff2	0.953028	1.51685712915685e-33
Hpgd	-1.90869	1.81464362648775e-33
Sept3	-1.11849	4.14547859050675e-33
Ccl11	3.23421	4.59839587935895e-33
Meox2	1.24619	1.2600766450889e-32
Ifitm1	-1.57397	1.2600766450889e-32
Lgi1	3.39498	5.75186480178255e-32
Dst	0.725513	5.89836157076112e-32
Igf2r	1.02031	7.42042877165741e-32
Twist2	-0.955275	1.25535077641128e-31
Fzd8	1.09607	1.44721426688668e-31
Fzd9	-3.1804	3.64964323125071e-31
Dcbld1	-1.13364	5.22650449980841e-31
Phactr2	1.58168	1.02755948723089e-30
Kirrel3	0.894683	1.17990242272454e-30
C530008M17Rik	-1.04097	4.20009324448328e-30
Msx1	-2.26929	4.67170832128834e-30
AW551984	0.912671	9.69679957142527e-30
Prrx2	-0.859515	2.41877234077092e-29
Itga8	-0.773952	6.74444355592499e-29
Add3	0.730655	1.09260538647134e-28
Sorbs2	-1.53916	1.44746676921154e-28
Ndst3	-2.30115	1.47965787582578e-28
Col9a1	-3.03341	1.58372506950038e-28
Sp7	-3.2457	1.85491301661178e-28
Enox1	0.656188	2.86668069444772e-28
Dlk1	2.17807	7.78693058929032e-28
Smad7	-0.81935	4.55465928438927e-27
Axl	0.817935	5.26248798245303e-27
Fzd4	1.14836	1.13341464145451e-26
Celf2	1.10229	1.59657887995485e-26
Dennd2a	0.766405	2.02454040593262e-26
Itgbl1	-3.54536	3.49321575851521e-26
Bmp2	-1.1703	1.05794479863624e-25
Gm49959	1.18094	1.06586952569825e-25
Airn	1.111	1.06586952569825e-25
Sema3d	-1.64447	1.66484327268946e-25
Fap	1.36193	1.84895661076669e-25
Ptgis	1.05608	2.40408388699989e-25
Cxcl13	4.74344	2.68737087445993e-25
Efhb	1.26975	3.81281868019389e-25
Mylk	-1.20794	4.31197076162401e-25
Islr	1.18494	8.74361993547043e-25
Epb41l2	0.448792	8.74361993547043e-25
Tfap2b	-2.71797	1.15795715307431e-24
Rflna	-1.35588	1.6479323848469e-24
Filip1	1.58263	1.69361232250126e-24
Prokr1	2.15476	1.69699155698515e-24
Robo2	-0.790584	1.69699155698515e-24
Tfap2c	-2.69163	2.79001806448694e-24
Smarca1	0.440943	3.67118290910274e-24
1700018A04Rik	-1.47051	3.67118290910274e-24
Col7a1	-2.66939	3.70821483950961e-24
Asb4	2.04448	3.73794042909342e-24
Gm6878	1.91849	3.73794042909342e-24
Cnnm1	-1.8648	4.11323684154401e-24
Mllt3	-1.37808	5.37562488626482e-24
Alx1	-2.70088	7.15307922567943e-24
Kcnip4	-2.11167	7.99984730201461e-24
CJ186046Rik	-1.93272	9.10352812640753e-24
Magi2	-0.622981	1.08284019874845e-23
Acan	-2.63633	1.48558373337173e-23
Scx	0.77056	2.12199257131656e-23
Sox9	-1.69142	2.24038292312177e-23
Loxl2	0.769942	3.49967044392667e-23
Maged2	0.657004	6.00070356112028e-23
Nalcn	-1.9589	6.07916062658948e-23
Alx3	-1.60192	6.09433710492937e-23
Stmn2	-1.81919	6.46365187543251e-23
Fgfr3	-1.8816	9.29799986780312e-23
Sorbs2os	-1.66415	1.3572688316529e-22
Lrrc7	-1.61218	1.52549004157545e-22
Ntm	1.4826	1.58521157814567e-22
Tfap2a	-2.31415	1.58521157814567e-22
Mia	-2.33425	1.7246952219576e-22
Acat1	0.53591	1.83510633236017e-22
Agrn	-0.88068	1.91872681941821e-22
Gm45025	-3.3339	2.37062482962665e-22
P3h2	0.748979	2.38027094753713e-22
Fam76a	0.53294	2.61185788431967e-22
Sh3rf1	-0.643598	5.37705705674894e-22
Cdh2	0.576141	5.84371373017864e-22
Igfbp6	2.1492	6.03167270040199e-22
Prex2	-0.975373	6.05296623868628e-22
Col11a2	-1.63942	6.95915470488309e-22
Cytl1	-4.04879	9.96281795639883e-22
Six2	-1.14699	1.98623597355241e-21
Cpxm2	-3.58572	2.18225376821735e-21
A730046J19Rik	3.06899	3.12432341833105e-21
Susd5	-2.71269	3.55998752522514e-21
Otor	-2.40791	3.80910792448702e-21
St6gal2	-2.40833	4.01182353199533e-21
Adamts17	0.8081	6.86927506743925e-21
Gm15336	1.6523	7.40910427426617e-21
Fgf7	1.50264	7.40910427426617e-21
Enkur	1.63708	9.11946036289561e-21
Car3	-4.70964	1.24916431042873e-20
Wnt11	0.830785	1.40704312408334e-20
Pea15a	0.779249	1.4820437801936e-20
Upf3b	-0.752119	1.65529112233963e-20
Sim2	1.15451	1.7153230408134e-20
Pth1r	-0.825121	2.0016240841926e-20
Fbln2	-0.851156	2.05457639051846e-20
Klf14	2.3758	2.60414832090565e-20
Capn6	0.76189	2.62772802491267e-20
Nrxn3	-1.29886	2.8182743698688e-20
Klf8	-1.12389	2.8819210992854e-20
Adam12	1.33915	3.4208337198332e-20
Spry1	0.786993	4.3420682701587e-20
BC028528	1.03357	4.69110055685289e-20
Gm20721	0.745191	4.91361100455773e-20
Vstm4	0.844736	5.64350562380457e-20
Lef1	-2.53877	5.78451947090602e-20
Magi3	0.617003	5.93821621649829e-20
Dusp14	1.35154	8.82437494949404e-20
Pear1	1.01953	9.08605234683172e-20
Rspo1	-2.49623	9.08605234683172e-20
Zfp521	-0.748834	1.1009617538457e-19
Grem2	-1.40247	1.10468044834384e-19
Kcnh1	1.77808	1.24356225830164e-19
Cxcl12	1.33564	1.60442117413742e-19
Mageb18	2.9078	2.42274847234268e-19
Nkd1	-1.52295	2.6337543625129e-19
Ccn1	-1.05984	4.11358563241739e-19
Hdac9	-1.25247	4.3817646325744e-19
Fat4	-0.810694	4.43643265839641e-19
Eif2ak3	0.615249	5.26495906910212e-19
Phldb2	0.503787	5.33540894742831e-19
Grin2a	1.46937	5.59639571093877e-19
Fzd10os	-1.67046	5.65356685542028e-19
Klhdc10	0.807371	7.95063881421603e-19
Nell1	1.05342	1.01310650420448e-18
Sdk1	0.665603	1.14428815701812e-18
Pdzrn4	-1.62679	1.20492340497175e-18
Trps1	-0.855121	1.22399899540235e-18
Mlf1	1.05206	1.22442912054115e-18
Sf3b5	0.624887	1.33445299314868e-18
Mecom	-0.719377	1.3733194413874e-18
Med12l	-0.957871	1.45162627973613e-18
Edil3	-1.06326	1.46748423997525e-18
Irx1	-1.35698	2.32994866547408e-18
Hapln1	-2.32536	4.44190512917528e-18
Clcn5	1.00468	5.75735734346776e-18
Adamts15	1.82555	6.28959414756314e-18
Dab2	-0.544159	7.35264356913772e-18
Copb2	0.348626	7.5606681198896e-18
Gm10578	1.4422	7.98256105801019e-18
Gm49708	-2.7686	8.43367448514213e-18
Apbb2	-0.469259	8.79317193502492e-18
Glis1	-1.62322	8.90139792005468e-18
Adamts9	1.00046	9.92715863218076e-18
Zfp9	0.494817	1.01869968053357e-17
Col8a1	-1.40686	1.07879507353188e-17
Myadm	0.963025	1.22210190662964e-17
Grb10	0.614394	1.22210190662964e-17
Alk	2.08415	1.22323809375036e-17
Twist1	-0.876415	1.35054828271224e-17
Tcf7	-1.38515	1.35054828271224e-17
Fzd10	-2.50508	1.41486660732426e-17
Cenpa	-0.985851	2.03320686833998e-17
Carmil1	-0.537084	2.2001873724042e-17
Nfib	0.467325	2.72885979898196e-17
Slc8a3	-1.13748	2.73465224135641e-17
Slc37a3	0.601753	3.77692176021527e-17
Plxna4	-1.12117	4.36961639808236e-17
Tceal5	0.765789	4.77178235484984e-17
Prkn	0.675836	4.77178235484984e-17
Dcaf6	0.428013	5.45092354594602e-17
Abca8a	1.36295	5.46107089762606e-17
Pten	-0.493899	5.46107089762606e-17
Nexmif	1.97269	7.2976471618871e-17
Magel2	1.78604	8.77715853025404e-17
Serping1	0.991774	8.80686242305453e-17
Arhgef3	1.11862	8.93938428077905e-17
Cox4i2	-1.16942	9.14017337263251e-17
Mical3	0.619783	9.68377633587672e-17
Cadm2	-1.53212	9.9180278899379e-17
Cdh4	1.41579	1.22877622254643e-16
Rtl1	0.929656	1.34739889205449e-16
Grasp	-0.642722	1.43360874287874e-16
Igfbp3	1.50124	1.57878690652238e-16
Copa	0.300908	1.67613947255255e-16
Arhgdib	-1.21054	1.76414826494657e-16
Rfx2	0.770569	1.87370189270035e-16
Fat1	-0.437418	1.91541573065911e-16
Axin2	-1.0592	2.17468041990743e-16
Acbd3	0.326789	2.44219850291389e-16
Alpl	-2.15811	2.86039539347516e-16
Pdlim1	0.942936	3.05766720261014e-16
Pamr1	1.39008	3.18482451637967e-16
Cdon	0.820203	3.53193156589492e-16
Lamp2	0.435084	3.59542392382766e-16
Scaper	0.582591	3.6922868616491e-16
Mirg	1.16899	3.77441755448599e-16
Armcx3	0.472379	3.95373099423575e-16
Dync1i1	-1.74097	4.28439050281257e-16
Nid1	0.619874	4.49887819242116e-16
Postn	0.812861	4.70435682195509e-16
Nid2	1.02547	4.85846864496534e-16
Xrcc4	-0.531086	5.37706410916866e-16
Dgkb	1.48589	5.66707088172214e-16
Nkd2	-1.23856	6.21895016245653e-16
Ren1	3.53843	9.19172520492525e-16
Tceal6	-1.79502	9.49844874652919e-16
Sema4d	-0.910343	1.03341066174986e-15
Pdxp	-1.01729	1.28070231348254e-15
Ttpa	-1.60473	1.28070231348254e-15
Lama1	-1.14801	1.29819413108206e-15
Hs6st1	0.667309	1.56748566803498e-15
F2rl1	2.28708	1.60890196400463e-15
Npr3	1.20749	1.71923206934668e-15
Kcnj8	2.36773	1.80327516441282e-15
C030017B01Rik	1.53198	2.10218709231202e-15
Dtna	0.756407	2.11984618557083e-15
Tmeff2	1.42358	2.23155057954288e-15
Flnc	0.758169	2.39789569642826e-15
Col3a1	0.739665	2.62479963947698e-15
Gria3	0.703064	2.63874053271861e-15
Mia3	0.43014	3.1093383456575e-15
Frem1	-1.38753	3.30827364627043e-15
Sult5a1	1.16069	3.4191682890405e-15
Rrm2	-0.883911	4.20594957679019e-15
Ccdc6	0.728182	4.36695126841387e-15
Chd7	-0.890416	4.70858046999572e-15
Rnase4	0.808637	5.21461137096426e-15
Poglut3	0.71366	5.39865538093554e-15
Adk	-0.638282	5.75890604797346e-15
Itm2a	1.29373	6.40116822037357e-15
Pim3	-0.619054	7.53180557430649e-15
Ppp2r2b	1.2067	8.58704286343844e-15
Smim1	1.4292	9.56733956530182e-15
Akap12	0.791842	9.82136768240978e-15
Prr5	0.811523	9.98209458735347e-15
Efna5	-0.649374	1.02040911734432e-14
Ly6h	1.60184	1.03203705881735e-14
Smad6	-1.16523	1.0439012048189e-14
Dpf3	1.20927	1.13734933814417e-14
Ncald	0.636647	1.13734933814417e-14
Tmem100	1.06643	1.14831547867132e-14
Dop1a	0.491509	1.27917897192289e-14
Mpp6	0.527363	1.37757978023898e-14
Cacna1e	1.44425	1.4827266172825e-14
Crnde	-1.66676	1.55208305108918e-14
Htr7	1.88405	1.65240514654849e-14
Tppp3	1.16869	1.72397835329509e-14
Ttc37	0.416615	1.86382992490194e-14
Lrfn2	1.6535	1.87700922302373e-14
Prkg1	-0.630775	2.19859378329782e-14
Nefl	2.42096	2.29859983409836e-14
Mfap5	2.5217	2.67000322919731e-14
Caln1	-1.03065	2.85958155088622e-14
Id4	-1.0391	2.88622308226828e-14
Atp1b1	1.30273	2.97290198630488e-14
Col5a1	0.623374	3.14115769108147e-14
Spata13	-1.69174	3.63217781434168e-14
Slc16a7	-0.985065	4.60956462563367e-14
Zdhhc9	0.543803	4.90281344329442e-14
Hmgcll1	-0.734698	4.91378998043425e-14
Smpd3	-1.70659	5.03970790579309e-14
Pfkl	-0.577969	5.33028914213489e-14
Ypel3	0.489724	6.23039832348616e-14
S100a4	-1.85473	6.23039832348616e-14
Map1b	0.804196	6.84090972906765e-14
B4galt1	0.568829	7.20554406803509e-14
Taok3	0.660148	7.79976681970265e-14
Fndc5	1.06304	8.0422488334936e-14
Heg1	0.608905	8.35813617127915e-14
Hpcal4	3.0225	8.99229489521943e-14
Ston2	0.717153	9.30952908079576e-14
Ank2	0.420994	1.19871206202401e-13
E430024P14Rik	1.07143	1.39605148022422e-13
Spon1	-1.13023	1.46569783756542e-13
Pappa	0.797363	1.48322963231833e-13
Foxc2	-1.36234	1.6079605131735e-13
Hebp1	1.0294	1.64424020550139e-13
Gpm6a	-1.96366	1.70231934032352e-13
Corin	1.07537	1.86304167751339e-13
Psat1	-0.864477	1.86304167751339e-13
Myo1b	-0.429656	2.0016798737653e-13
Cald1	-0.421218	2.01640473386652e-13
Grik4	0.739354	2.21908506340844e-13
Srr	0.469736	2.43049503572275e-13
Sec24a	0.488979	2.71703321238198e-13
Sema3e	-1.62527	2.77272232446482e-13
Eps8	0.761509	2.87097491279567e-13
Agrp	0.669404	2.876766012174e-13
Unc5c	-0.79895	2.87759626206299e-13
2610035D17Rik	-1.09228	2.9454207691986e-13
Lgalsl	-0.758875	3.06642948568771e-13
Slc35f3	1.82537	3.26007714454134e-13
Abcg2	0.503039	3.37341583463665e-13
Tgfbr3	0.717893	3.4282556383296e-13
Adamts16	1.95336	3.70146342032775e-13
Yipf5	0.350657	3.78492982060689e-13
Xkr4	0.942036	4.01193230572747e-13
Tmem132c	-1.37499	4.06065206410445e-13
Plat	0.886556	4.42196026096849e-13
Bcl7a	-0.947791	4.81437381837845e-13
Obsl1	0.572394	4.82523553281935e-13
Ctbp2	-0.624343	4.89813138610365e-13
Pik3r3	-0.528227	5.04179254971949e-13
Fam174b	-1.23182	5.3096224315697e-13
Casp12	2.29719	5.58182988031118e-13
Rasl10a	2.31481	5.74741118254999e-13
Ppp1r9a	0.732088	5.8645083669607e-13
Ddah1	-0.486407	5.96205360476769e-13
Aim2	-1.95477	6.40959220133391e-13
Antxr1	0.638604	7.11417632447549e-13
Hs3st3b1	-0.776431	7.11417632447549e-13
a	-1.26831	7.13494096171382e-13
Manea	0.612921	7.44797012169025e-13
Rasa4	0.978845	8.10096860704646e-13
Cilp	2.19236	8.1136364858081e-13
Rprm	-1.22239	8.1251423422867e-13
Etv6	0.485387	8.7342875785515e-13
Grik3	-1.69927	9.15264088267392e-13
Shisa9	1.18524	9.3236579336512e-13
Mtus2	0.884965	9.47426840480627e-13
Il6st	0.733233	9.79278749403164e-13
Gabarapl1	0.503511	1.04158675419979e-12
D7Ertd443e	1.75668	1.05725297696947e-12
Fdx1	0.831917	1.05973793573681e-12
Sgcz	-1.53851	1.15176048806054e-12
Cpq	-1.03836	1.15258238646806e-12
Cfap74	1.19271	1.20298820735153e-12
Gpd2	-0.633188	1.2816621895737e-12
Ankrd55	1.22204	1.35789965592064e-12
Rarg	-0.867689	1.46326213940987e-12
Sulf2	0.400013	1.52530559068764e-12
Dchs2	0.983683	1.63580647795966e-12
March8	0.570084	1.82464750167007e-12
Pou3f3	-1.29515	1.86498273011252e-12
Tnfsf12	0.704947	1.87995492999329e-12
Asap3	0.842294	1.96823771993181e-12
Diaph1	0.452772	2.21455493616775e-12
Sema5a	-0.50542	2.32470668380776e-12
Sostdc1	-1.44723	2.6079251733073e-12
Sdc4	-0.854672	2.74416685236518e-12
Dph3	0.400899	2.7717140496677e-12
Fgf18	0.746101	2.83118913298099e-12
Rint1	0.43234	2.8566498922843e-12
Arsj	1.03	3.19793440465973e-12
Ypel2	-1.01329	3.19793440465973e-12
Cux1	-0.352857	3.5391412272846e-12
Cers6	0.337877	3.78321577604421e-12
Slf2	0.508889	4.18040273685452e-12
Epb41l5	-0.760735	4.20651581133578e-12
Phex	1.55073	4.57891936040639e-12
Dach1	-0.912849	4.64954026689529e-12
Creb3l2	0.404962	4.72556247857873e-12
Cd1d1	-0.767516	4.94476015150265e-12
Spink2	1.63762	5.38246725658635e-12
Syne4	0.688463	5.38246725658635e-12
Msi1	-0.533564	5.86163096939652e-12
Hs3st5	-1.35066	6.72299077497074e-12
Vldlr	0.799712	6.74220051774289e-12
Peg10	1.59204	7.07055516910056e-12
Nhsl2	0.583531	7.23546565376387e-12
Hs3st6	-3.05071	7.72357477772684e-12
B3galt1	-0.445376	7.90975765871115e-12
Sec23a	0.387896	8.40870565986048e-12
Cenpv	-0.731096	8.44226611790946e-12
Fam124a	1.01067	9.02483004262249e-12
Npnt	-0.869105	9.48180102263131e-12
Ldb2	0.6927	9.79848961813443e-12
Pfkfb3	-0.871923	1.08085186209935e-11
Cntn6	-3.23716	1.08172790098261e-11
6330403K07Rik	0.397449	1.0833356778279e-11
Dleu2	1.04704	1.09528665873511e-11
Slc38a4	0.677313	1.09528665873511e-11
Bcl7c	0.35601	1.16518241113542e-11
Lpar1	0.493871	1.16568594547302e-11
Cisd1	-0.711037	1.17520529321749e-11
B3glct	-0.639144	1.18188348413896e-11
Ccdc102a	0.594535	1.19782316847302e-11
Atf7ip2	-1.38113	1.28289946928552e-11
Pax7	-2.34673	1.28851993187553e-11
Dpysl3	0.759056	1.40799203393128e-11
Tmem196	0.885197	1.47763951371722e-11
Ptprz1	-0.886614	1.48097537853569e-11
Syn2	1.71004	1.54175854072618e-11
Ebf4	-0.505801	1.56878341488167e-11
Nktr	0.28045	1.58361542169708e-11
Gm29418	-1.56839	1.68043886337043e-11
Ttc19	0.353867	1.78041784918896e-11
Gramd1b	-0.906137	1.78087722121402e-11
Mme	-0.836164	1.99991887193582e-11
Hs3st3a1	-0.807389	2.28769802230443e-11
Gm16201	1.06668	2.54434084413311e-11
Col6a3	0.856571	2.65428942714755e-11
Pdgfrb	-0.644456	2.79988827173472e-11
Cfap69	0.756058	3.00373496311918e-11
Dio3	2.2322	3.40191939105705e-11
Pitx1	1.19662	3.53030041285402e-11
Arhgap26	1.40609	3.66732966679507e-11
Mthfd1l	-0.821902	3.86825863686114e-11
Pde4a	-0.795659	4.17577434330889e-11
Gm48749	-0.990845	4.28535844973525e-11
Fuca2	1.06556	4.39521785091007e-11
Tmem108	1.0197	4.44191543522152e-11
Zbtb16	-1.51169	4.46123261212277e-11
Galntl6	-1.76269	4.78086891672191e-11
Spp1	-1.92299	4.91581030027826e-11
Itga11	-0.806689	5.05266954494628e-11
Cask	0.359063	5.49727256003519e-11
Fmo5	1.25179	5.55909012293646e-11
Wdr17	-1.84812	5.56415989795084e-11
Gm49958	1.09599	6.04359438742519e-11
Wwp2	-0.56478	6.07700765449281e-11
Cldn1	1.1328	6.15993477221157e-11
Sox11	-0.899832	6.30595444094348e-11
Mast4	0.822177	6.3266965195561e-11
Pdxdc1	0.421005	6.33592328498174e-11
Akap11	0.423818	6.66232518425978e-11
Rcor2	-1.08612	7.48569231252365e-11
Ifitm5	-2.5275	7.76099799051553e-11
Thbs4	3.14408	8.36081710976820e-11
Vat1l	1.35192	9.33744769457635e-11
Zfp947	1.09037	9.98247369108867e-11
Creb5	0.699698	1.05628487131894e-10
Dlgap1	0.77637	1.05842759555617e-10
Crispld1	-0.922667	1.30010086171421e-10
Aplp2	-0.301681	1.33774760998982e-10
Pja2	0.277837	1.37679187464121e-10
Tnrc6a	0.34743	1.4116042454443e-10
Sgip1	-0.723784	1.55310115618361e-10
Rbm46	1.08181	1.6247876148476e-10
Lrrc75b	-2.38288	1.62706071962508e-10
Tbcel	0.396394	1.63185313982653e-10
Ctnna2	-1.756	1.65464909569957e-10
Gm10125	0.676049	1.66118647706201e-10
Gm15520	1.78486	1.84232595676892e-10
2610316D01Rik	-0.937035	1.86730776534571e-10
Rrbp1	0.429195	2.00944936837542e-10
Rras	0.750164	2.26380354534898e-10
Zcchc18	-0.888439	2.49541701029374e-10
Gmppb	0.870921	2.50765569561372e-10
Whrn	0.735876	2.57891573196511e-10
Syt16	-0.789897	2.90285835515552e-10
Irf8	1.6808	2.99630757495529e-10
Gm16036	1.02303	3.02841927224479e-10
Avpi1	-0.782232	3.33975965442548e-10
Fam199x	-0.596474	3.37001554766259e-10
Pak7	-1.24389	3.41940931353459e-10
Dkk1	-2.38255	3.58734231313086e-10
Bex2	-0.681485	3.79301801313316e-10
Nudt19	-0.704047	3.79301801313316e-10
Erc2	-0.744303	3.79301801313316e-10
Neat1	-1.50348	3.91506360725312e-10
Rtn3	0.411091	3.97808322955913e-10
Slitrk1	1.68922	4.06137561753758e-10
Cited1	1.76613	4.19490289843153e-10
Dnph1	-1.17409	4.21051619342968e-10
Csmd2	1.23911	4.24741970197607e-10
Fam45a	0.478839	4.3534422335996e-10
Tnks2	0.279488	4.5690620215534e-10
Matn1	-2.84886	4.64831453064175e-10
Sema5b	0.901626	5.07299546436833e-10
Dab1	0.566744	5.09670811609511e-10
Tanc2	0.556034	5.21436174099614e-10
Tom1l2	0.368921	5.28667406016806e-10
Arhgap21	0.667	5.41116456498441e-10
Ptpn14	-0.723565	5.41116456498441e-10
Fcgrt	0.58426	5.90005539931758e-10
Tshz2	1.21491	5.95715248336044e-10
Khk	0.969234	5.95715248336044e-10
Unc5b	-1.2595	6.24618528687801e-10
Asah2	0.628496	6.57101707967352e-10
Fgfr2	-0.695111	6.85940912455708e-10
Eif1ax	-0.465078	6.92788977288972e-10
Gfra1	1.13835	7.5361875536114e-10
Dock4	-0.460742	7.5361875536114e-10
Gprin3	-1.74004	7.60636489942764e-10
Panx3	-5.17485	7.75759276572828e-10
Smarca2	0.544371	7.85598532366282e-10
Spc24	-0.941618	8.06182707861108e-10
Ptk7	-0.418351	8.77665097295611e-10
Dhx35	-0.800784	8.80627922773822e-10
Cenpj	-1.05693	8.96400007911277e-10
Mtss2	-0.653655	8.9852433689744e-10
Kcnn3	1.23061	9.03143804142455e-10
Il1rapl2	1.83658	9.0637208626555e-10
Qprt	2.01204	9.23037939898265e-10
Snap47	0.395683	9.45032951394039e-10
Rcc2	-0.746521	1.06824606714975e-09
Derl1	0.386921	1.13276208376161e-09
Emid1	-0.949691	1.15342564982119e-09
Gpr153	0.654784	1.26385046174111e-09
Ephb1	0.644289	1.39603150964783e-09
Vkorc1	0.709245	1.44482593301837e-09
Gm26688	-2.36529	1.50087596720697e-09
Prcp	-0.66252	1.57321624413079e-09
Ccnb3	2.78848	1.69052518204972e-09
Dcn	0.883857	1.7978191565285e-09
Slpi	-1.84681	1.81652778493123e-09
Ptprr	-1.68907	1.82786386339376e-09
Cnrip1	0.483045	1.918103666537e-09
Cnmd	-1.24772	1.98698913346245e-09
Pbx3	-0.446679	2.02808044114202e-09
Rbpj	-0.419141	2.16810741100977e-09
Hpca	1.54351	2.18327813085045e-09
Zeb1	0.821152	2.20888361638053e-09
Xrn1	0.216385	2.2119861007206e-09
Ggta1	1.3916	2.24183260413644e-09
Selenoi	0.455167	2.29711900167599e-09
Scara5	1.32764	2.66986732808355e-09
Fam114a1	0.441313	2.67811245759574e-09
Il18	-1.22841	2.71126616437824e-09
1110019D14Rik	0.737755	2.86378690597479e-09
Srf	-0.818026	3.01941161557193e-09
Zfp950	0.324901	3.08842546712343e-09
Lhfpl1	2.25914	3.29542863363387e-09
Stx4a	0.40941	3.49556562953172e-09
Bzw2	-0.388198	3.51216374272274e-09
Tspan2	-0.73804	3.55190898872625e-09
Ccnd3	0.399114	3.64932075041908e-09
Slc6a15	-1.21019	3.92967286791967e-09
C430049B03Rik	1.02915	3.94391001343659e-09
Wnt9a	0.846616	3.94391001343659e-09
Igdcc3	-0.978503	3.94391001343659e-09
Insrr	1.53058	4.16067550296329e-09
Nrgn	-1.35975	4.25671019278931e-09
Ppfibp2	-0.606025	4.54368050217372e-09
Ptx3	0.653791	4.68475210054248e-09
Yipf3	0.553327	5.00970266946968e-09
Slc25a5	-0.497223	5.11407612379033e-09
Fmnl3	-0.47203	5.15881976853046e-09
Hnmt	1.84296	5.56673616642517e-09
Des	1.28408	5.61592874427401e-09
Prkcg	1.07271	5.69049085804584e-09
Asph	-0.504086	5.70627681579107e-09
Fam227b	1.05885	5.71764866325001e-09
Ajap1	1.63057	5.91698998404624e-09
Tmed3	0.55929	6.94463139028432e-09
Kif26b	-0.766923	7.03730828477725e-09
Tshz1	0.562365	7.14557866103855e-09
Zeb2	-0.767754	7.50775023655033e-09
Prxl2a	-0.669053	7.57455270193419e-09
AI314278	1.52596	7.88353233405895e-09
Mapk8ip1	0.536374	7.95399926164055e-09
Pkdcc	0.412117	8.10296355305138e-09
Dlx3	-2.13506	8.10296355305138e-09
Pantr1	-1.35545	8.12162562133566e-09
Irak3	1.35963	8.3005955521497e-09
Il1rl2	1.36114	8.60705299918255e-09
Prnp	0.503782	8.7752085611748e-09
Tmem132cos	-1.46746	8.82235902166566e-09
Lix1	-1.02769	8.85458753026974e-09
Cdh7	-2.16738	8.85458753026974e-09
Asb3	0.329055	9.07072056866315e-09
4930503L19Rik	-0.811619	9.35349187863863e-09
Rnf144b	-0.86526	9.78890931193439e-09
Slitrk6	-1.44547	9.78890931193439e-09
Pik3r5	1.39044	9.82304279314595e-09
Glp2r	1.69163	9.94101196993984e-09
Dclk3	-1.92325	1.03040770363202e-08
Pinx1	-0.560167	1.10872120593013e-08
Gab1	0.34761	1.16230664565188e-08
Begain	0.952117	1.16881440309445e-08
Cltc	0.257928	1.19061712136696e-08
Olfr920	1.26743	1.30801431837736e-08
Pmf1	-0.78724	1.35438380831833e-08
Trak1	0.616061	1.36691094896898e-08
Mcc	0.906759	1.39249832090859e-08
Pank1	-0.722948	1.44503429218667e-08
Gabra3	0.859844	1.50468670108994e-08
Prkd1	-0.341723	1.51347287879301e-08
Cast	0.498672	1.56759383897945e-08
Rab2a	0.187915	1.59775376035163e-08
Mybpc1	-1.62797	1.67570329089448e-08
Nptx1	1.55315	1.72080472277324e-08
Cdc16	0.309169	1.73658096979069e-08
Sh3pxd2b	0.449203	1.8003048573077e-08
Morn4	-0.758777	1.82184628656191e-08
Map7d2	-1.14118	1.96869009586685e-08
Barx1	1.00249	2.04940017985817e-08
Clec2d	1.19939	2.05238332861816e-08
Gpr107	0.412533	2.07960992441551e-08
Tfpi	0.723072	2.09465922075103e-08
Siah2	-1.08763	2.13422156441929e-08
Tfap4	-0.770069	2.1963165316091e-08
Hivep3	0.764616	2.21578450442254e-08
Lpl	1.90866	2.21817614045038e-08
Ctnnb1	-0.241643	2.21946361636307e-08
Tspan12	-0.929203	2.21946361636307e-08
Kcnmb4	-0.460943	2.27894489789929e-08
Tst	-1.76628	2.32172041775879e-08
Klf13	-0.832781	2.35367573670437e-08
Mmd	-0.505317	2.52116642665862e-08
Stx5a	0.28835	2.98339679097382e-08
Pkm	-0.510637	2.98456463114278e-08
Slc40a1	0.846627	3.12095532207145e-08
Kcnab1	0.766216	3.12095532207145e-08
Ran	-0.471137	3.12095532207145e-08
Mbnl3	0.554382	3.13115422399222e-08
Ssc5d	1.0229	3.16452160985451e-08
Rragb	-1.21345	3.19974711016415e-08
Ripor1	0.624147	3.39378380466722e-08
Spire1	-0.452348	3.39378380466722e-08
Ajuba	-0.980429	3.47096358091549e-08
Rbm47	0.709883	3.47690173949764e-08
Gm45716	-0.927544	3.50600693386152e-08
Sar1a	0.301073	3.56892367365479e-08
Gm45847	1.08455	3.64952643828509e-08
Tbx2	-0.811552	3.75103103466158e-08
Tmem123	-0.467905	3.83068873302666e-08
Aif1l	-0.906263	3.83068873302666e-08
Eya2	-0.380373	3.85430695186054e-08
Gm15155	-1.40674	3.90031131570233e-08
Pxn	0.683902	3.94208317974018e-08
Abca3	0.793522	4.08391313775924e-08
Trpm5	1.20403	4.24061271716296e-08
Tnxb	1.4352	4.47115322657756e-08
Atp11c	-0.357503	4.62324213710028e-08
Gm42439	-0.349327	4.88906557917964e-08
Slc22a1	1.02614	4.98830812376791e-08
Rbpms	0.550125	5.19098995235247e-08
Cxcl9	3.22925	5.27500501071556e-08
Desi2	0.313022	5.30781984644414e-08
Ybx1	-0.393244	5.34487402337569e-08
Hs6st2	0.721689	5.3601843066457e-08
Sdk2	0.606211	5.56232646200658e-08
Efcab2	0.594678	5.68764190223019e-08
Plxna2	-0.767741	5.72162002622667e-08
Sult1a1	1.77422	5.72979240912557e-08
Gas7	1.27449	5.72979240912557e-08
Gja1	-0.463382	5.91590429630253e-08
Lats2	-0.486149	5.97765570529999e-08
Ntrk2	0.784721	5.98851152540426e-08
Tle4	-0.418303	6.02083415950782e-08
Syt1	-1.53531	6.06241932692077e-08
Tmem158	1.49538	6.15844243076356e-08
Gm28154	-1.4491	6.18024295601148e-08
Smoc1	-0.654152	6.18647186748146e-08
Gab2	0.53786	6.32826673213371e-08
A530020G20Rik	3.11328	6.41020288290402e-08
Kif16b	-0.509353	6.98970849438629e-08
Epyc	-1.30996	7.05464674009253e-08
Mbnl1	-0.342958	7.14888578222312e-08
Fam8a1	0.372012	7.18789323369496e-08
Pex11a	-1.58127	7.25240749896531e-08
Adcy5	-0.770705	7.60997469065326e-08
Slc12a6	0.331643	7.62621039123211e-08
Egfl6	1.24126	7.70949463626221e-08
Col9a2	-0.886133	7.99835528127562e-08
Aak1	0.425477	8.01068300617817e-08
Prss35	1.03473	8.30169819740506e-08
Pcdh10	-0.722338	8.30169819740506e-08
Gm34759	2.16749	8.38676980892664e-08
Coq8b	0.803244	8.38676980892664e-08
Wdfy1	0.304878	8.47365085883246e-08
Yrdc	-0.55181	8.47365085883246e-08
Tada2a	0.320008	8.65702892287597e-08
Mpzl2	1.01464	8.69125737051684e-08
Opcml	0.607403	8.73280748450655e-08
Socs3	0.641679	9.0611512325257e-08
Cyp4f13	0.862053	9.26860400914665e-08
Gm8773	-2.28198	9.57460943456014e-08
Prune2	-1.58357	9.7955678516228e-08
Msra	-0.663228	9.80480064237094e-08
Cbln4	-2.96338	1.01254169976691e-07
Atoh8	-0.818096	1.0126640340634e-07
Runx2	-1.53739	1.05329287658891e-07
Rras2	-0.499657	1.05491978130582e-07
Rassf2	1.52898	1.05571102586904e-07
Kcnq1ot1	0.762379	1.12579400836868e-07
Lzic	-0.440491	1.14887791685612e-07
Ddx21	-0.399859	1.162622647353e-07
Gm10860	1.81779	1.17765752116609e-07
Nrk	1.87817	1.19358007924375e-07
Dnmbp	0.566275	1.19548466753321e-07
Erlec1	0.353291	1.19760822689822e-07
Cib4	1.36175	1.21007261761655e-07
Pantr2	-1.24374	1.22032643617348e-07
Asb13	-0.845239	1.22240819114331e-07
Itih5	1.36831	1.23425633566453e-07
Clic1	0.41035	1.23425633566453e-07
Gpr83	2.53115	1.23441381156141e-07
Cryzl2	-1.4086	1.25331691541982e-07
Ly6e	0.685666	1.27232784129249e-07
Pde7b	-0.60948	1.28289068121289e-07
Zfp395	0.436244	1.30129761082108e-07
Csrnp2	-0.650704	1.334298377568e-07
Tm9sf4	0.283864	1.37124694832604e-07
Slc13a5	-3.41966	1.4032394843991e-07
Galnt13	-1.30101	1.44341157188444e-07
Flrt3	-0.552495	1.46482892036046e-07
Agbl3	-0.720965	1.46979825937335e-07
Incenp	-0.75951	1.47667955846512e-07
Gm49732	1.42718	1.47687364731613e-07
Tcp11l1	-0.427562	1.55795709058925e-07
Hmcn1	-0.511191	1.55870082890897e-07
Rev3l	0.427905	1.56103812698666e-07
Crtac1	-0.856836	1.58399551821261e-07
Aqp1	-1.26266	1.65031839547761e-07
Cdkn1c	1.14961	1.66123519757943e-07
Tpd52l1	-0.55865	1.73362674751329e-07
Amigo2	1.38858	1.73473328129551e-07
Mapk10	1.12788	1.73473328129551e-07
Gm16070	-1.26248	1.73473328129551e-07
Snx1	0.358963	1.75468038631446e-07
Tnfsf13	1.03844	1.928018885252e-07
Rlim	0.248324	1.97667471543553e-07
Usf2	-0.379373	1.99092474661823e-07
Ror1	0.473155	2.01943518234504e-07
Kazn	0.616743	2.04853292689906e-07
Pttg1ip	0.366565	2.04998726940154e-07
Zswim6	-0.448691	2.08663497060467e-07
Hmgb3	-0.857585	2.08663497060467e-07
6330411D24Rik	1.25723	2.18624623172638e-07
Pdgfd	0.776812	2.3275226706889e-07
Gpr45	-0.937083	2.3275226706889e-07
Cdc20	-1.07095	2.37699967533857e-07
Farp2	-0.366199	2.38417089582839e-07
Inip	-0.660082	2.43166727441008e-07
Actn1	-0.494911	2.46102399149304e-07
Dnah7b	0.596051	2.47513109688851e-07
Fbln5	0.553064	2.49706236614755e-07
Col5a3	1.99545	2.54381173141294e-07
Cry2	0.820398	2.57206260381223e-07
1700047F07Rik	-2.75479	2.62390699570666e-07
Plpp5	0.431713	2.67020088788775e-07
Camk1	0.344892	2.74854468967503e-07
Gm36283	-1.21911	2.79831497891451e-07
Knstrn	-1.0394	2.80331451278445e-07
Lysmd3	0.368364	2.88516758399743e-07
Omd	-1.17934	2.91644052999247e-07
Gm31087	3.27996	2.99820957507398e-07
Slc14a1	1.79543	3.01055207152399e-07
Grin3a	-0.68574	3.05549691561066e-07
Klhl29	0.81991	3.05797071690591e-07
Neil3	-1.03535	3.12757306181408e-07
Pcca	-0.693888	3.16226273222963e-07
Kif11	-0.969778	3.23664652073026e-07
Gm8113	-3.17512	3.26939192658131e-07
Nxpe3	-1.02706	3.27068391357386e-07
Ikbip	0.346282	3.37865268155774e-07
Rybp	0.356408	3.38027533369326e-07
Klf2	0.896031	3.49317876586481e-07
Gstm2	0.817525	3.547846737428e-07
Heatr5a	0.265889	3.547846737428e-07
Nucks1	-0.324787	3.55384382237039e-07
Tcf24	1.82487	3.67411269598082e-07
Jmjd1c	0.565544	3.7081655801473e-07
C1qtnf7	1.0382	3.73003147428938e-07
Gpm6b	0.935388	3.75045668632485e-07
Serpinb6a	0.503962	3.76994177605269e-07
Snai1	-1.57918	3.80977766336166e-07
Gm27224	-4.44721	3.95774314341711e-07
Kcnrg	1.05061	4.01887398977794e-07
Eml1	0.66737	4.13799196654898e-07
Aff4	0.1848	4.13799196654898e-07
Nenf	0.472283	4.15117089530536e-07
Ccnd1	-0.509116	4.20397889922735e-07
Gm49003	0.593424	4.26622536043868e-07
Sdc2	-0.729061	4.39743267643278e-07
Prdx6	-0.528611	4.4321773671207e-07
Tpm2	-0.726547	4.55593250556499e-07
Osbpl2	0.433783	4.67177651194325e-07
Adamts6	-0.450206	4.75934539447274e-07
Dhx32	0.6397	4.76814478566788e-07
Arfgap3	0.365882	4.81407235974385e-07
Tmc6	-0.974362	4.81407235974385e-07
Ccna2	-0.958006	4.81442994863834e-07
Golga5	0.304706	4.82071164897548e-07
Anp32e	-0.387862	4.91096846487819e-07
Hnrnpa1	-0.392357	4.94424276379724e-07
Grk5	-0.663083	5.00874834813683e-07
Hivep2	0.570564	5.28522902951434e-07
Lama2	-0.462114	5.34235075059482e-07
Arfgap1	0.432159	5.55960076454968e-07
Calcoco1	0.382269	5.67719825603522e-07
Rap2a	0.382376	5.72473284570578e-07
Azin2	0.451364	5.72691620924856e-07
Fam102b	0.318182	5.72691620924856e-07
Sgsm2	0.607712	5.81100454784607e-07
Slc25a13	-0.524928	5.87567903760566e-07
Ralyl	-0.961345	5.99092607602072e-07
Snx18	-0.428805	5.99104741012563e-07
Draxin	-1.39651	5.99560286912894e-07
Dyrk2	0.316097	5.99741917713101e-07
Stac	1.29071	6.02153769432629e-07
Lztfl1	0.286182	6.09331010404515e-07
Sox8	-1.96259	6.10582148923881e-07
Entpd7	-0.590292	6.30984520788192e-07
Foxl2	-1.23165	6.3100191417903e-07
Nog	-1.00006	6.36870279243379e-07
Zfp354c	0.31911	6.45075689009889e-07
Vamp5	-1.21129	6.47267268695536e-07
Apela	-1.21068	6.52472793360191e-07
St3gal1	0.463369	6.54034079160312e-07
Prmt5	-0.4838	6.54034079160312e-07
Bmp7	-0.596068	6.54034079160312e-07
Rcl1	-0.474092	6.55766272393917e-07
Tmem175	0.42264	6.65786437441776e-07
Cdca8	-0.963913	6.69124820666722e-07
Mef2c	-1.16693	6.73775000736894e-07
Slc16a2	0.607654	6.82880527351058e-07
P2ry14	-0.977186	6.98644865892732e-07
Gm26771	0.621951	7.20284214209238e-07
Scfd1	0.337807	7.20561243632421e-07
Sclt1	0.342362	7.40653776543715e-07
Cdk17	-0.31784	7.4833648544108e-07
Unc45b	-2.4965	7.60139636115112e-07
Vapb	0.405954	7.6420834558708e-07
Rfx7	-0.291113	7.6420834558708e-07
Rasl11b	-0.869794	7.6420834558708e-07
Pa2g4	-0.290423	7.70508953018631e-07
Sept10	-0.473267	7.70508953018631e-07
Palm3	0.754416	7.72695367468307e-07
Vcl	-0.6591	7.72695367468307e-07
Bok	-1.22606	7.74991058561723e-07
Tmcc3	1.35813	7.80238561450138e-07
Bcl11a	-0.656387	7.87424766541219e-07
Hey2	-1.24597	7.96160698946322e-07
Adgra2	-0.93784	8.04819842122425e-07
Lrrc8b	-0.792338	8.08772904454793e-07
Ugp2	0.380803	8.2199564477957e-07
Utp18	-0.353811	8.26357722357489e-07
Tmem263	0.255757	8.26898685609098e-07
Lmo4	-0.541584	8.26898685609098e-07
Tcf15	1.35692	8.33837742348547e-07
Fer	0.360008	8.66670524740898e-07
Nrg3	-1.06181	8.66719164044882e-07
Uaca	0.651897	8.7343753029009e-07
Tex2	0.47055	8.99045833518184e-07
Galnt17	0.60855	9.6241145920495e-07
Ogn	0.673285	1.00230600775785e-06
Uchl3	-0.381092	1.00787770333524e-06
Mapk8ip2	1.13049	1.01385485502373e-06
Cdca3	-1.03982	1.03583271611273e-06
P3h1	0.315065	1.0419169717954e-06
Anln	-1.07781	1.07611817198395e-06
Tbc1d16	0.65971	1.09483926152877e-06
Tanc1	-0.703448	1.10155044125817e-06
Socs2	0.588672	1.10309218872849e-06
Mpc2	0.325417	1.10523666251855e-06
Zfp229	0.521183	1.10934028879679e-06
Fank1	1.19868	1.13012816688532e-06
Hus1	-0.77714	1.13012816688532e-06
Sytl5	0.626699	1.1473699877415e-06
4930444A19Rik	-0.574714	1.15192134442594e-06
Iqgap2	0.516135	1.199055852059e-06
Fpgs	0.476052	1.21419502121128e-06
Col6a6	2.32625	1.21623515998333e-06
Rab3gap2	0.393917	1.22527919238853e-06
Irgm1	1.46881	1.23615419144228e-06
Prkaa2	-0.893833	1.27024468919316e-06
Abcc1	-0.602655	1.27862591978922e-06
Zfp101	-0.488006	1.28706307483371e-06
Scrn1	0.91808	1.34196715051693e-06
Ntng1	-0.52259	1.34196715051693e-06
Rbm20	-0.753474	1.34244326084527e-06
Atp1b2	0.639046	1.38555573830045e-06
Eno1	-0.737234	1.40267111345208e-06
Gm5127	-2.11592	1.41962737224719e-06
Cotl1	0.468743	1.42616489006518e-06
Nol4	0.812017	1.48403701628647e-06
Apod	-1.41275	1.48403701628647e-06
Tnn	-1.42549	1.49347800763587e-06
Surf4	0.24108	1.49796182661906e-06
Virma	0.229267	1.50026424046075e-06
Ankrd44	-0.609876	1.50105930160784e-06
Gpr20	2.21632	1.52741455597448e-06
Apex2	0.321355	1.54369577021081e-06
Gramd2	-1.41886	1.55690802713322e-06
Baz1a	-0.71073	1.63627040325436e-06
Cadps	-1.5228	1.65241887545044e-06
Prkcq	-0.911172	1.66580306901703e-06
A230057D06Rik	0.230871	1.70102458399344e-06
Lrfn5	-1.04361	1.71920929419391e-06
Wls	-0.268471	1.73587583198474e-06
Nts	-2.34476	1.75289915124177e-06
Kif23	-1.1372	1.75528528169921e-06
Brdt	0.45586	1.76371829605412e-06
Golph3l	0.421172	1.7740153585359e-06
Acly	0.409495	1.84126403581433e-06
Rap2b	-0.472483	1.84614887112935e-06
Sox5os4	-1.43082	1.88360402052068e-06
Chst3	-0.921847	1.89818433367194e-06
Ccdc114	0.811755	1.9121033318034e-06
Fbxw8	0.322746	1.91808704198067e-06
Thbs3	0.543044	2.03188949965459e-06
Celsr1	-1.37293	2.03188949965459e-06
Mgat4e	2.07859	2.07106660146488e-06
Gm41335	-1.79632	2.12989134819655e-06
Elovl6	-0.464372	2.13682169067191e-06
Plekhh2	0.637791	2.14999895309404e-06
Ephx4	0.771473	2.15014553263858e-06
Gm5089.1	-2.28487	2.18315837051366e-06
Xpnpep3	0.415581	2.25640942191054e-06
Sipa1	0.831727	2.2600086530664e-06
Irf9	0.648609	2.28406334239444e-06
Nbr1	0.291924	2.28566107042521e-06
4932438H23Rik	2.94216	2.29259112082155e-06
Tnc	0.6006	2.35363583969245e-06
Gm5095	2.44479	2.35949244867256e-06
Serinc3	0.288529	2.50572449245185e-06
Ggt5	1.1149	2.52645024437023e-06
Arcn1	0.225927	2.52645024437023e-06
Dhrs3	0.921357	2.52888949355609e-06
Map1a	0.845536	2.5350936119151e-06
Ube2b	0.253559	2.54059725859352e-06
Eef1e1	-0.49685	2.55378641554866e-06
AI506816	-0.426061	2.57767699252029e-06
Akt2	0.314224	2.59643673289234e-06
Kcnq5	-1.72174	2.60720980927793e-06
Bub1	-1.14587	2.64663086521611e-06
Cdca7l	-0.994426	2.64911927305907e-06
Kdr	1.5589	2.67787769605537e-06
Slc24a3	0.678455	2.67787769605537e-06
Gm37768	0.404552	2.69235129933245e-06
0610043K17Rik	0.614092	2.75958512799004e-06
Tbrg1	0.392281	2.76145784783979e-06
Ninl	-0.548098	2.7692815754901e-06
Gm43647	4.05913	2.78082923803397e-06
Fyn	0.490945	2.81732214407567e-06
Ccbe1	1.24304	2.85331779932719e-06
Ogfod3	0.555077	2.86133111886184e-06
Tnfrsf1a	0.515213	2.86306719549232e-06
Cep112	0.424851	2.92418843617628e-06
Trpc3	0.577552	2.95870193888582e-06
Gimap9	0.870014	2.97764243110025e-06
Lamc1	0.489351	3.01970307311862e-06
Dmpk	0.803761	3.04313939636313e-06
Arhgef6	-0.683597	3.05046239539836e-06
Fgfr1	-0.35266	3.06302049211729e-06
Steap3	1.01765	3.06984243866098e-06
Klhl13	0.451703	3.1482951028968e-06
Atp6v0d1	0.365296	3.16017475850569e-06
Cdk6	-0.757478	3.18188126386878e-06
Syne2	0.596157	3.18691094624321e-06
Mipol1	0.307244	3.23554317921398e-06
March2	0.452309	3.25295561832025e-06
Ptma	-0.494946	3.27303126937561e-06
Slc4a4	0.592288	3.27738975066546e-06
9530026P05Rik	0.988691	3.31844075667014e-06
Zbtb12	-0.470265	3.36064458689602e-06
Pgm3	0.297527	3.39010567383358e-06
C2cd2l	0.717162	3.52343999384904e-06
Man1a	0.844138	3.52435339688334e-06
Rell1	-0.412009	3.53698452721962e-06
Parp9	1.27066	3.59676349178068e-06
Tpbg	-0.677	3.59676349178068e-06
Rbms3	0.304201	3.64090896661208e-06
Col11a1	-0.816825	3.64669761433712e-06
Cyp27a1	-0.876652	3.68909150335594e-06
Has2	1.07786	3.7450174241024e-06
Chrd	1.06321	3.7450174241024e-06
Gfpt1	0.300919	3.7450174241024e-06
Pabpc1	-0.214896	3.7450174241024e-06
Camk2a	0.833959	3.76607590170566e-06
Mknk1	0.439646	3.76918578867073e-06
Nck2	-0.314268	3.77763826522982e-06
Sp5	-2.70842	3.77763826522982e-06
Armcx6	0.522731	3.81501565886746e-06
Bard1	-0.935376	3.89764057335085e-06
Rhoc	0.438511	3.89882502428061e-06
Morc4	0.502258	3.96989881731732e-06
Copz2	0.594341	4.01586884989657e-06
Kremen1	-0.464273	4.06638937520005e-06
Bpgm	-0.513233	4.18874015085118e-06
Pgam1	-0.440022	4.31361866426305e-06
Ubxn11	0.662983	4.34053035338416e-06
Erg28	0.32097	4.34849416193634e-06
Gpc1	-0.474977	4.3560812395612e-06
Chpf	0.458301	4.58930336181676e-06
Tmem164	0.489118	4.6078058831405e-06
Ubc	0.382705	4.6078058831405e-06
Col22a1	-1.82093	4.6078058831405e-06
Sdc1	-0.437642	4.67538485126998e-06
Eif1a	0.312923	4.7588117082304e-06
Edaradd	-0.938573	4.81987332784917e-06
Cnksr2	-0.708977	4.82066384535009e-06
Bicc1	0.666658	4.83218545275972e-06
Slc7a8	0.985413	4.85363144160589e-06
Chst15	-0.664699	4.89137707473148e-06
Srsf3	-0.348187	4.91061441956241e-06
Fam122b	1.07648	4.95528564246326e-06
Hhip	-1.38998	5.00787671102059e-06
Gm49969	0.666327	5.00869099863787e-06
Arsb	0.544159	5.01154716239511e-06
Fat3	0.529335	5.0370357748165e-06
Tmem39a	0.296812	5.0394827397835e-06
Mpnd	-0.524942	5.04337897244186e-06
Cdca7	-0.570306	5.11246692111662e-06
Ifrd1	-0.282385	5.12036947367833e-06
Fgf8	1.67291	5.12611626267178e-06
Dnah5	2.13373	5.16846483484693e-06
Sec31a	0.273369	5.17953112295464e-06
Apba1	0.408464	5.19676799087051e-06
Fmn2	-0.56752	5.24012953040342e-06
Sptbn1	0.398755	5.24160644923255e-06
Galnt16	0.92905	5.27201866164521e-06
Gpr180	0.600122	5.27201866164521e-06
Trmt13	0.377708	5.27201866164521e-06
Carmn	-1.233	5.27201866164521e-06
Strip1	-0.374658	5.30572385446191e-06
Cdh8	-0.905494	5.3712044254663e-06
Selenbp1	0.580017	5.4129816573534e-06
Gm40999	-1.40919	5.42053173335023e-06
Fam162b	1.98731	5.42103906878682e-06
Lrrc59	0.265364	5.45369339951867e-06
Glt1d1	-1.41567	5.45369339951867e-06
Sfrp2	1.06468	5.47839643536846e-06
Fjx1	0.660486	5.54907241564749e-06
Mphosph10	-0.49794	5.60926152766673e-06
Fancc	-0.63887	5.65360343080815e-06
Gm13944	2.06159	5.67252606682283e-06
Nde1	-0.492858	5.68584958814331e-06
Grid2	-0.817246	5.71246302621681e-06
Iqgap3	-1.6109	5.72529415930826e-06
Frzb	-1.41897	5.81772031992834e-06
Folh1	3.57014	5.84487548627649e-06
Ngly1	0.346877	5.8820870472823e-06
Gm34354	1.47244	5.9130842395445e-06
Stk39	-0.352664	5.95164647141538e-06
Nagk	0.404738	5.97453368384245e-06
Susd2	1.38666	6.18838016946937e-06
Dock11	0.805925	6.20978400618459e-06
Dlc1	0.46825	6.35712694975788e-06
Sub1	0.549983	6.39333655421493e-06
Gm33497	-1.46189	6.49992979731459e-06
Col6a1	0.66243	6.58336116185796e-06
Ly75	-0.782274	6.77354489282296e-06
Elk3	-0.315823	6.85389614251077e-06
Pacrg	0.878396	7.12089991619456e-06
Cdhr4	0.621864	7.13474220396881e-06
Srsf2	-0.437914	7.1776601154619e-06
2610318N02Rik	-1.09708	7.30565949930866e-06
Mir22hg	0.812041	7.31443734240244e-06
Dhdds	0.277872	7.31443734240244e-06
Lrfn4	-0.531192	7.32440412339691e-06
Olfml2a	-0.842773	7.41229151838737e-06
Gm30075	2.35715	7.46754340387373e-06
Jph1	-0.577899	7.53981303396347e-06
Plxnb1	-1.08266	7.80333130059269e-06
Atrnl1	0.327894	7.83515163231319e-06
Ppp4r4	-0.970173	7.83515163231319e-06
Gm37240	-0.357778	7.91401879753694e-06
Rbmx2	-0.563589	7.91401879753694e-06
Tek	0.986658	7.95948301877761e-06
Igfbp5	0.783927	8.06848928098665e-06
Car13	-0.896307	8.11516338331004e-06
Sntg1	1.48402	8.12112681599567e-06
Rpl5	-0.225768	8.14871646022349e-06
Pgk1	-0.369618	8.26124718258803e-06
Gm15050	1.21971	8.34554116111849e-06
Foxf2	-0.93384	8.41938038372022e-06
Mmp16	0.314259	8.66691959740967e-06
Gm13052	0.631568	8.80557735867077e-06
Mtch1	0.312543	8.84899703931225e-06
Gm14226	-2.27197	8.84899703931225e-06
Elf4	0.551679	8.9631824598616e-06
Tfrc	-0.643227	9.12906026218867e-06
Msantd3	-0.365877	9.20925583302078e-06
Vamp8	0.482237	9.21421974161254e-06
Chst5	1.28565	9.24836399970136e-06
Tmem120b	0.643894	9.24836399970136e-06
Gm16351	-1.55472	9.27323098157534e-06
Pcnx	-0.338665	9.28821159692765e-06
Gm50321	-2.83133	9.28821159692765e-06
Ica1	-0.587697	9.34972513776209e-06
Dock1	0.410263	9.57478146154562e-06
Gbp9	2.15247	9.59447739839218e-06
Olfr921	1.71048	9.82242305800978e-06
Nmt2	-0.309772	9.94453243051128e-06
1700123M08Rik	0.611948	1.00103307976886e-05
Qrsl1	-0.661895	1.01019179969606e-05
Gm28153	-0.953479	1.02322229229719e-05
Rab3gap1	0.215916	1.02589857661946e-05
Cuedc1	0.4347	1.02780623642957e-05
Hinfp	0.396971	1.03169843904563e-05
Dclk2	-0.767906	1.04463505284318e-05
Lratd2	-1.01715	1.04828656616553e-05
Lxn	-0.49551	1.05469713707598e-05
Prkar1b	0.501725	1.0618686918506e-05
Galns	0.591932	1.07396174537877e-05
Cenpw	-0.843516	1.08594512522598e-05
Sst	-2.32178	1.11067531000823e-05
Cpne5	-0.622393	1.11963697349689e-05
Lamb1	0.848133	1.12381935955802e-05
Vamp4	0.401028	1.14115606743769e-05
Tunar	1.36845	1.14115806562735e-05
Agpat4	0.393825	1.15877003281903e-05
4933407L21Rik	1.67785	1.16814956558516e-05
Zfp46	0.467257	1.1711749866014e-05
Gm31243	-1.23671	1.17167845057806e-05
Slc27a3	-0.8242	1.17576991091723e-05
Cenpf	-1.13953	1.18042149804494e-05
Arfgef3	0.883539	1.19917002761394e-05
Snx4	0.221914	1.19917002761394e-05
Atp5g2	-0.483822	1.19917002761394e-05
Tnip1	0.393054	1.20849628439497e-05
Shisa5	0.493742	1.21371201333582e-05
Osbp	0.257128	1.21863571530432e-05
Nbl1	-0.521028	1.21863571530432e-05
Cyp20a1	0.358925	1.22024118872185e-05
Mroh3	-1.27134	1.22024118872185e-05
Alb	-3.74712	1.22234505813963e-05
Gm26713	-4.13376	1.26598883442037e-05
Abat	0.373907	1.27392582400425e-05
Gm29530	-2.84766	1.27392582400425e-05
Ptpre	-0.655338	1.32422042907451e-05
Fbln1	0.454791	1.33411195474714e-05
Ikzf1	1.4453	1.34956768128871e-05
Csgalnact1	0.965914	1.34992951354023e-05
Dpp4	1.50263	1.37479874257294e-05
Ggh	-0.493984	1.42294240789232e-05
Paxx	0.662074	1.4257345861317e-05
D16Ertd472e	-0.318206	1.43025582701318e-05
Mob3b	-0.570544	1.43069210051236e-05
Plch1	-1.02988	1.43759484589079e-05
Trhr	2.58488	1.4420742794274e-05
Kctd16	1.14267	1.45616882654937e-05
Stat4	-1.31758	1.45616882654937e-05
Adcy8	-1.26255	1.46183972465767e-05
8030423F21Rik	1.7469	1.48423581454311e-05
Trpc5os	1.7134	1.53047217479826e-05
Clip4	0.532307	1.53357114817651e-05
Slc18b1	-0.544351	1.54358281166807e-05
Ptn	0.769816	1.55492409833918e-05
Notum	-1.98139	1.58256265025288e-05
1810055G02Rik	0.349742	1.60951871690099e-05
Nr5a2	1.97377	1.61420865581796e-05
Rab9	0.38534	1.61503187527562e-05
Gm5089	-1.12678	1.61920610653726e-05
Lfng	-1.2785	1.62021597976075e-05
Prlr	1.96564	1.63910671480133e-05
Igf2	0.70375	1.68178712670741e-05
1110018N20Rik	1.33788	1.68190265788583e-05
Gm15787	0.485273	1.68926696133296e-05
Crabp2	0.513875	1.70542062835958e-05
S100a16	1.7213	1.7872719266212e-05
Sec22b	0.34234	1.78860984866213e-05
Arpc5l	-0.308523	1.78860984866213e-05
Dpf1	-0.658715	1.79101536183864e-05
Pid1	-0.597565	1.82157689904295e-05
Hdgf	-0.409974	1.82317307293563e-05
Gm14066	-0.83867	1.84247124576954e-05
Fam180a	-2.34609	1.86960625115051e-05
Gsdmd	0.765413	1.90659629446821e-05
Zbtb18	-0.758937	1.90768438853008e-05
Frmd5	-1.1425	1.91595882917996e-05
Marc2	0.285657	1.92424777273535e-05
8030453O22Rik	0.725207	1.93294018165195e-05
Gm46440	0.641839	1.93294018165195e-05
Pdgfb	1.34874	1.94690195500967e-05
Numbl	0.3428	1.9771375640026e-05
Cadm1	-0.854968	2.00248735558024e-05
Gas2	1.12573	2.00560607074622e-05
Dnajc12	-0.67861	2.04960572471052e-05
Rhobtb1	0.343841	2.07182871118163e-05
Ndn	1.04292	2.07765437257804e-05
Inava	-0.836614	2.13165298596956e-05
Mif	-0.475285	2.15323866710129e-05
Akap17b	-0.507467	2.15399486189607e-05
Tmem67	0.57035	2.17459388714516e-05
Naaladl2	-0.366445	2.17858467995433e-05
Adarb2	1.56402	2.22985794599898e-05
Nbas	0.289498	2.22985794599898e-05
Tox	-0.490461	2.25208571974015e-05
Pld5	0.654806	2.40545541821245e-05
Herpud2	0.280309	2.40545541821245e-05
Smarcd1	-0.427863	2.45434773518792e-05
Mapre3	0.456527	2.49050351049512e-05
Ptgfr	-1.04683	2.49050351049512e-05
Kit	0.596965	2.50348856611151e-05
Neto1	1.04664	2.50788853187283e-05
Entpd2	2.88194	2.51185254518962e-05
Dach2	-1.01358	2.53535465634934e-05
Gm42702	0.645715	2.54733167281029e-05
4933411O13Rik	-2.70871	2.56581746030827e-05
Nefm	2.19459	2.5792657380281e-05
Sertad1	-0.448702	2.59798511627594e-05
Rspo2	0.959901	2.60951388718556e-05
Disc1	0.575845	2.65577516470515e-05
Mecomos	-0.680009	2.67857294491617e-05
Gbf1	0.318779	2.78384861793012e-05
Tnnt1	1.31828	2.83346099764631e-05
Ehd3	-1.00868	2.83346099764631e-05
Tagln	-0.618742	2.8568810902454e-05
Dpep1	-1.4578	2.86468660614625e-05
4931414P19Rik	-0.526346	2.92816267573193e-05
Vstm2a	0.815777	2.94502386315481e-05
4930412C18Rik	0.954601	2.94840350852061e-05
B230334C09Rik	-0.992283	3.02445065694102e-05
Sass6	-0.450369	3.04516084946157e-05
Sec16b	-0.899383	3.0627446733164e-05
Vps13d	0.263444	3.0637876420567e-05
Prkar2b	-0.383774	3.0637876420567e-05
Mir670hg	1.3538	3.07080021191252e-05
Uck2	-0.500066	3.07080021191252e-05
Tlr4	1.59106	3.18914207507476e-05
Pdp1	0.601965	3.25259117788749e-05
Lypla1	-0.337458	3.25259117788749e-05
Dhx29	-0.367372	3.28435796840853e-05
Lsp1	0.978622	3.34364345148346e-05
Gaa	0.580161	3.36452275430736e-05
Gm37876	-1.12635	3.39073340973488e-05
Mycl	-0.642293	3.42526443268229e-05
Lamc3	-1.06806	3.46352134072371e-05
Lrrc17	0.446569	3.57049127148191e-05
H2afz	-0.673679	3.57049127148191e-05
Shcbp1	-0.798455	3.57874773201042e-05
Cenpe	-0.883323	3.60116521148642e-05
Far2	-0.554159	3.63421894119116e-05
Vgll4	-0.346349	3.65858203622383e-05
Dnal1	0.358345	3.66033776033492e-05
Zadh2	0.579201	3.67322985706712e-05
Mlip	-2.19538	3.67404118819372e-05
Colgalt2	0.658513	3.67767625745833e-05
Arhgap1	0.324781	3.67903554643932e-05
Them7	1.56524	3.68402179382338e-05
Hnrnpab	-0.363909	3.71331276544089e-05
Jakmip2	-0.723361	3.7804297631659e-05
Mid1	0.501657	3.78754259640403e-05
Kcnmb2	-0.68676	3.79104943495456e-05
Spr	-0.425658	3.79964268669199e-05
2810459M11Rik	1.88232	3.84062946510326e-05
Slitrk5	-1.19	3.85924217720494e-05
Anxa6	0.360294	3.94560018292991e-05
Racgap1	-0.793306	3.94560018292991e-05
Cflar	0.300818	4.03631063143262e-05
Atp8a2	-0.503705	4.06033176928186e-05
Alg11	0.339194	4.07855951627369e-05
Gm4211	1.14447	4.08326424217279e-05
Golga3	0.312571	4.10527716923651e-05
Gm48898	-1.36703	4.12465082006188e-05
Rsph4a	1.40822	4.15817348850838e-05
Phc2	-0.261098	4.1992069935706e-05
Id2	-0.675011	4.2441852886435e-05
Cnr1	-1.02664	4.28543755369707e-05
Ankrd29	-1.12473	4.34543269520102e-05
Bfsp1	0.775142	4.37422766480912e-05
Alg13	0.419902	4.44255378235716e-05
Col6a5	2.17377	4.46090927406317e-05
Lrpap1	0.30082	4.4610232667946e-05
Mrpl23	-0.589716	4.4610232667946e-05
Sap30	-0.737429	4.47947378147726e-05
Dpy19l1	-0.36729	4.54923020648952e-05
Tafa1	0.925663	4.58875109634793e-05
Dusp9	-0.934963	4.60045448121671e-05
Slain1	-1.05868	4.70555457850619e-05
Ddx25	0.48509	4.72786649793054e-05
8030451A03Rik	0.689646	4.76073516714123e-05
Ogdh	0.246685	4.80126274281487e-05
Htt	0.231068	4.83151566591109e-05
Nostrin	0.62957	4.83911182771547e-05
Gm43260	0.798229	4.89045926156517e-05
Bad	0.293949	4.90261119856405e-05
Mettl7a1	0.500347	4.93546867388495e-05
Ubfd1	0.285056	4.93546867388495e-05
Anapc15	-0.58162	4.93546867388495e-05
Dnase2a	0.694724	4.94250415587323e-05
Zfp36l2	-0.475869	5.00656295650541e-05
Mad2l1	-0.706185	5.04267822561308e-05
Grn	0.317591	5.04645275526534e-05
A730049H05Rik	0.833176	5.0657830944651e-05
Adh7	-1.89416	5.10479347567634e-05
Tacc3	-0.855941	5.15469813057118e-05
Ncapg	-0.890769	5.21244363389654e-05
Rasef	1.22318	5.24634607530584e-05
Ppp2r3a	0.307914	5.36176675096236e-05
Gpc2	-0.510509	5.43976801003402e-05
Aldh1a3	1.1777	5.45332230970379e-05
Gm15866	0.84948	5.50665784743855e-05
Ate1	-0.38378	5.50678320852126e-05
Mxra8	0.716459	5.58651671171035e-05
Colec12	0.309835	5.58942881003864e-05
Lifr	0.459155	5.65209657155446e-05
Erbb4	-0.624337	5.67535572854831e-05
Ift88	0.3139	5.67651407202181e-05
Prss23	-0.634007	5.68107896212141e-05
Sik1	0.539652	5.69394949850323e-05
Lrrn3	-0.730492	5.70292452609998e-05
C79798	-0.574179	5.70357490652901e-05
Gm42884	-2.13232	5.70862895400745e-05
Tubb6	0.70055	5.72773233237052e-05
Ppp1r3c	0.989255	5.74212904019425e-05
Slc22a22	1.62211	5.79871794838355e-05
Trpv4	-1.27594	5.79871794838355e-05
Aldoc	-1.31604	5.79871794838355e-05
Rfc5	-0.486346	5.84262109347601e-05
Antxr2	0.315361	5.85605814080951e-05
Dnajc25	0.303567	5.92988556190345e-05
Sned1	0.801269	6.00882380693553e-05
St8sia1	-0.739056	6.00882380693553e-05
Tspan14	-0.442632	6.02460836250749e-05
Mki67	-0.92637	6.04145492011494e-05
Ahnak2	1.35846	6.10259491222169e-05
Fgf11	0.749677	6.13044385075082e-05
Prdm16	-0.945214	6.27495459891916e-05
Stard9	0.687436	6.31108629952606e-05
Pakap.1	-0.897705	6.32529186511089e-05
Cobll1	0.560224	6.34279587486015e-05
Armc2	0.479141	6.34279587486015e-05
Gramd3	0.505234	6.36330518424881e-05
Kcnn2	-0.835973	6.36330518424881e-05
Sinhcaf	-0.566201	6.42541586025016e-05
Gm15902	0.850464	6.44195035235042e-05
Pogz	-0.321779	6.479521894666e-05
Ism1	-1.07566	6.479521894666e-05
Cped1	-1.11725	6.48368620790965e-05
Cacnb4	0.379569	6.50356329182888e-05
Ccpg1	0.467386	6.55383887333874e-05
Polr3g	-0.654786	6.58818024505571e-05
Arhgap20	0.860788	6.61386434760918e-05
Sapcd1	-1.01286	6.77582883133795e-05
Rangap1	-0.487253	6.77726359498707e-05
Egfros	0.918327	6.78550961099756e-05
Gm48748	-1.45232	6.81965673437327e-05
Runx1t1	0.45734	6.83505778545774e-05
Sema6a	-0.325094	6.85948156298539e-05
Tmem132e	1.27413	6.88713587637016e-05
Cdc42ep2	0.997579	6.916443608989e-05
Fkbp14	0.533664	7.01563117995286e-05
Ift81	0.31012	7.02037762981883e-05
Plcl1	1.07891	7.03800736296783e-05
Rtl3	0.814829	7.18285875573036e-05
Enc1	-0.597	7.18911734579517e-05
Rmdn1	0.207583	7.19202001504188e-05
Hacd1	-0.293752	7.23153549720295e-05
Cp	-1.43904	7.25203150411267e-05
Tbc1d15	0.298184	7.28107210281346e-05
Dennd4c	0.252883	7.30289154600339e-05
Bach1	0.380599	7.38641918089295e-05
Pawr	-0.907223	7.38641918089295e-05
Kbtbd11	-1.1823	7.5239183632896e-05
D030025E07Rik	-4.48832	7.54281182309782e-05
Egfr	0.912145	7.58810723641018e-05
Gstt2	0.899717	7.62485978981983e-05
Mamdc2	1.07607	7.73432678702885e-05
Dkk2	0.631005	7.73432678702885e-05
Arl2bp	-0.293945	7.75561100675023e-05
Zc3h8	-0.607084	7.77367051011268e-05
2310022B05Rik	-0.351979	7.79159865286293e-05
Gm10941	0.751148	7.81855568562895e-05
Nod2	-1.28143	7.87023310409591e-05
Lsmem1	-0.683974	7.89959236865971e-05
Rpl39l	-1.48336	7.90662482001593e-05
Nsmce1	0.381029	7.93253381572028e-05
Zfp655	0.333541	7.94501566097824e-05
Gm10369	1.50091	7.97097512406996e-05
Mak	1.08989	7.97097512406996e-05
Kcnb1	0.579073	7.98372777350725e-05
Sec24d	0.4466	8.0261249174312e-05
C1s1	1.32273	8.04720717424399e-05
Ptger3	0.798582	8.04720717424399e-05
Melk	-0.979054	8.06730148756449e-05
Abca6	0.998039	8.0714213577407e-05
Phlda1	0.849869	8.0714213577407e-05
Agtr1a	1.21334	8.13420217833807e-05
St3gal5	0.28249	8.16855630776961e-05
Bend4	-0.721891	8.26146104623492e-05
Rtl5	0.706662	8.37246065823552e-05
Pde9a	0.39453	8.38153029140525e-05
Arglu1	-0.222517	8.39372523408267e-05
Lactb2	-0.51282	8.43435588062052e-05
Krt18	1.20735	8.44073752068338e-05
Qk	-0.234261	8.48134307921067e-05
Tm4sf1	0.96338	8.54788252589991e-05
Prodh	-0.651488	8.59427895185186e-05
Uso1	0.238033	8.61101891569424e-05
Fnip2	-0.323609	8.64196167416742e-05
Arl2	-0.409762	8.64196167416742e-05
Cavin3	-0.714945	8.64196167416742e-05
Spin2c	-0.772957	8.64196167416742e-05
Med14	-0.260463	8.90701008983511e-05
Gli3	0.242583	8.9677288041137e-05
H2-Eb1	1.66068	8.98345495579529e-05
Slc25a1	-0.406599	8.99890203550203e-05
Akr1b3	-0.335424	9.03962806399872e-05
Pimreg	-1.56788	9.05502245209459e-05
Bmp5	-0.650708	9.10853613366287e-05
Dram2	0.399196	9.14174964685878e-05
Scyl1	0.386392	9.18610822589188e-05
Nradd	-0.492145	9.18610822589188e-05
Plpp2	-0.701862	9.22387253288737e-05
Vrk1	-0.350591	9.29477286682523e-05
Gm9885	1.68556	9.49772129095783e-05
Smc1b	0.740379	9.49772129095783e-05
Cep78	-0.506242	9.51739605752843e-05
A330015K06Rik	0.74103	9.51768269681067e-05
Gnasas1	0.635287	9.53091485065011e-05
Kif15	-0.756859	9.5796653811823e-05
Cmas	0.341356	9.62907156786988e-05
Gm4117	-0.634629	9.63358207240683e-05
Astn1	-0.512504	9.68107507349741e-05
Gtpbp2	0.416919	9.70070337876756e-05
Ube2cbp	-0.462836	9.70070337876756e-05
Pccb	0.492035	9.82832233618947e-05
Pop1	-0.492605	9.82832233618947e-05
Sv2b	1.33603	9.83026649424857e-05
Scarb1	-0.524049	9.85886471754592e-05
Samd5	-0.631823	0.000100356
Gm36529	2.43721	0.000100454
Pex3	0.384513	0.000101519
Zswim8	0.272299	0.000102653
Tox3	0.383639	0.000102983
Agbl1	1.12661	0.000103929
Rnf165	0.364431	0.000103934
Stag3	0.845419	0.000104691
Fam135a	-0.252999	0.000105612
Rcc1	-0.471916	0.000105612
Shisal2a	1.71258	0.000105816
Gadd45g	-0.679109	0.000106195
Zmynd12	1.55141	0.000107267
Ooep	-1.42801	0.000108098
Scrg1	-1.70854	0.00010839
H19	0.531789	0.000108576
Gas1	0.478448	0.000108685
Pycr1	0.6486	0.000109311
Lypd6	-0.45434	0.00011046
Tagln3	-0.899149	0.00011046
Gpc3	0.574498	0.000110988
Map2	-0.527122	0.000110989
Rbpms2	0.50565	0.000111354
Gmds	-0.470189	0.000111421
Rnf103	0.248451	0.000111452
Erlin1	0.333734	0.000111936
Cenph	-0.67924	0.000112887
E130102H24Rik	0.528547	0.000112945
Gm28320	1.06502	0.000112945
Sec61a1	0.201358	0.000113939
Tcta	0.613028	0.000114015
Cbr2	-3.13213	0.000114758
Hspa1a	-1.1243	0.000114911
Ormdl3	0.296094	0.000115804
Thap4	-0.391907	0.000116501
Dnajc2	-0.32988	0.000116994
Rbfa	0.416271	0.000117293
Tmem106b	0.279062	0.000117867
Anp32b	-0.219966	0.00011787
Klhl14	-1.38737	0.00011787
Ttyh2	0.9815	0.000117875
Git2	0.307708	0.000117932
Gm31641	-1.13059	0.000118053
Gm29019	1.23444	0.000118604
Phactr3	-0.949149	0.000119966
Xpot	-0.254628	0.000120168
Dusp3	0.498377	0.000120733
Vps72	-0.313148	0.000121136
Snai2	-0.383557	0.000122007
Gkap1	0.434365	0.00012239
Atp6v1a	0.247987	0.000122541
Sqstm1	0.333234	0.000123011
Sfxn5	0.450393	0.000123099
Gimap6	1.10154	0.000123398
Mindy3	-0.331626	0.000123619
Pcsk5	0.371238	0.000124376
Hmgcs2	-1.65558	0.000125005
Fam118a	0.395985	0.000125594
Mapk4	0.671661	0.000125961
Xpr1	0.487777	0.000125991
Bend5	-0.448722	0.000126078
Raph1	0.50514	0.000128162
Pwwp3b	0.784951	0.00012819
Car2	-1.26263	0.00012819
Dok5	0.519996	0.00013068
Pofut2	0.406973	0.0001314
Stxbp2	-1.54929	0.000131634
Ostn	-2.34926	0.000131648
Pard3b	0.378197	0.000132662
Ddr1	0.42781	0.000133222
Lrrc20	-0.495362	0.000133475
Atxn7l1os2	0.897543	0.000133866
Chn1	-0.424316	0.000134255
Pick1	0.348483	0.000134639
Mycn	-1.0967	0.000135216
D830036C21Rik	1.07976	0.000135652
Rims1	-0.443893	0.000135835
Trip12	0.233476	0.000136355
Hsd17b11	0.407926	0.000136365
Set	-0.316368	0.000137609
Lin7a	-0.915561	0.000137946
Irx2	-0.892587	0.000138365
Gm12526	-0.896527	0.000139455
Lef1os1	-1.75214	0.000139503
Sra1	0.277319	0.000139967
Tmem165	0.291909	0.000144915
Rplp0	-0.250815	0.000145318
Ska1	-1.48595	0.000147124
Kcnc2	2.31101	0.000147714
Arhgap23	-0.357674	0.000149774
Zfp428	-0.475121	0.000149774
Gm5532	2.72866	0.00014995
Oxnad1	0.625161	0.00014995
Fndc3c1	0.681747	0.000150233
Ift27	0.482763	0.000152017
Dock9	0.928184	0.000155291
Ube2w	0.198776	0.000155587
Ralgds	0.385581	0.000156111
Birc5	-0.747092	0.000157229
Rab3c	-1.29323	0.000157615
Bet1l	0.345843	0.000157971
Cse1l	-0.320558	0.000158525
Rpsa	-0.329704	0.000162261
Npdc1	0.796571	0.000162718
Crebrf	0.299816	0.000163055
Cd248	0.482091	0.000165398
Gm27017	0.966524	0.000166191
Pdpn	0.71835	0.000166191
Bcas3	-0.250317	0.000166191
Ddit4l	-0.53187	0.000166191
Trim46	-0.570528	0.000166191
Dnajb9	0.490878	0.000166324
Anp32a	-0.321615	0.000168326
Tom1l1	-0.43564	0.000168326
Slc12a7	-0.554076	0.000168393
Kdm5b	0.187443	0.000168693
Tgfbr1	-0.333704	0.00016891
Wdr46	-0.543839	0.000170277
Gnai1	-0.473135	0.000172878
Daam2	-0.618463	0.000173386
Dnajc9	-0.361765	0.000175178
Pcgf6	-0.414435	0.000175178
Rttn	-0.384384	0.00017651
Pnpla8	0.224802	0.000178075
Ube2q2	-0.266691	0.000178101
Wdr78	0.415731	0.000178368
Zfp867	0.375022	0.00017992
Egfl7	0.533505	0.000180023
Hgf	0.979413	0.000180764
Cip2a	-0.675345	0.000180764
Eri3	0.22519	0.000182022
Adgrb3	-0.436593	0.000182022
Sept11	0.240879	0.000186177
Prr11	-0.729609	0.000186253
Grp	1.41794	0.00018642
Arl13b	0.361243	0.000186564
Maob	-0.863403	0.000186564
Ech1	0.351803	0.000186649
Tigd2	0.479312	0.000187
Jund	0.414509	0.000189034
Traf6	-0.412653	0.000189034
Npy	1.52201	0.000189452
4833439L19Rik	-0.415249	0.000189734
Sugct	0.544463	0.000190896
Pskh1	0.291089	0.000193131
Spns2	-1.11512	0.000193376
Tm9sf2	0.20881	0.000193725
Abhd14b	0.679394	0.000195145
Mei4	-0.686326	0.000195332
Akr1b10	-0.859342	0.000195873
Plau	1.16598	0.000195969
Aarsd1	-0.300414	0.000195969
Fam149a	0.559507	0.000196025
Ggcx	0.408664	0.000197184
Nipal1	1.85123	0.000197531
Myof	0.330785	0.000198301
Gm11551	2.1618	0.000199939
Selenos	0.420526	0.000203534
N4bp2l1	0.470733	0.000205993
Dnah11	-1.06628	0.000205993
Gpt2	-0.634648	0.000206237
Lmntd1	1.45359	0.00020635
Atf2	0.198533	0.000206739
Gm42902	0.795249	0.000206999
Cbx6	0.344114	0.000208494
Ambn	-2.92844	0.000209599
Ppfia3	-0.577213	0.000211447
Kif14	-1.44805	0.000212983
Dnaja1	0.44514	0.000213567
Gstt3	1.28161	0.000218339
Hpse	-0.839595	0.000218339
Lrp5	-0.360817	0.000220474
Ggact	-0.553025	0.000220561
Apbb1ip	0.76703	0.000221239
Chst10	-0.773823	0.000222158
G3bp1	-0.218238	0.000223426
Gbp8	2.34901	0.000224896
Gm20646	-0.950403	0.000226637
Trio	0.309119	0.000226781
Tgfbr2	0.649634	0.00022811
Hacd4	-0.612516	0.000229599
Gdf6	1.08587	0.000231521
Slfn5	1.46005	0.000232463
Runx3	-1.70987	0.000232634
2510009E07Rik	0.303389	0.000233145
Fgd5	1.04167	0.000235731
Qrfpr	1.52374	0.000236593
Gm43138	0.749591	0.000236593
Fam155a	0.628194	0.000236593
Zfp820	0.479297	0.000237648
Slc10a7	0.231879	0.000239508
Gm49853	-3.35822	0.000240985
Zmiz2	-0.378822	0.000244908
3010001F23Rik	0.394259	0.000244985
Kitl	1.16248	0.000247183
Amer2	-0.995484	0.000247345
Rimkla	1.49838	0.000249009
Dock7	0.245423	0.000250529
Eln	0.950614	0.000251551
Npas2	1.57652	0.000252841
Agtrap	0.712981	0.000258163
Gm48155	-3.46798	0.000258779
Sorcs2	0.372167	0.000258931
Actn4	-0.281348	0.000259089
Smap2	0.345122	0.000259173
Crym	-0.980353	0.000259373
Vwa2	-1.12599	0.000259373
Sh3bp4	0.411609	0.000259619
Ccdc40	0.724803	0.000260102
Itga3	-1.04808	0.000260102
Palld	-0.287545	0.000260436
Gdpd2	1.23384	0.000260705
Oxr1	-0.420979	0.000261631
Rap1b	0.289915	0.000263394
Rsl1d1	-0.264097	0.000263394
Brinp1	0.712128	0.000266768
Tob2	-0.277423	0.000268322
Spdl1	-1.11885	0.000268548
Zfp385b	1.91337	0.000269453
Hddc2	-0.416832	0.000269453
Kcnj2	-0.715971	0.000269453
Tmem178b	0.961129	0.000272291
Baiap2l2	-1.16808	0.000274131
Ddx39	-0.423623	0.000274395
Ctsk	0.502963	0.000274886
Ezh1	0.287059	0.000280143
Pla2g4a	0.348339	0.000280514
Foxc1	-0.865531	0.000280761
Fgd3	-2.49475	0.000283765
2810032G03Rik	0.690209	0.000284584
Crispld2	-0.797721	0.000287787
Gm14582	0.598127	0.000287822
Hnrnpm	-0.25416	0.00028989
Kif20b	-0.674233	0.000292732
Gm28376	-0.667965	0.000292802
Plxnc1	0.672266	0.000293306
Apaf1	0.370306	0.000293887
Atp10a	0.511645	0.00029682
Prex1	-0.490977	0.00029682
Mgat2	0.393765	0.000297507
Rcan3	0.517813	0.000297827
Gm20033	0.819149	0.000301778
Fryl	-0.314176	0.000307333
Smc4	-0.473413	0.000307333
Gm10134	1.46427	0.000308116
Dancr	-0.615467	0.000309001
Atp4a	1.459	0.000309657
Dlgap5	-0.924685	0.000311486
Agmo	1.07124	0.000311636
Itpr2	0.651163	0.000314981
Sdsl	1.13412	0.000317111
Il1r1	0.86692	0.000317111
Nrp1	0.602149	0.000317991
Plac1	2.1627	0.000319582
Chpt1	-0.248689	0.00032134
Ntf3	-0.742868	0.0003225
Gpsm2	0.513928	0.000323535
Fntb	0.335999	0.000324542
Zfp541	1.45393	0.00032585
Mga	0.269531	0.000326656
Ccn2	-0.891308	0.000326852
Col27a1	-0.260856	0.000327126
Gsdme	0.372778	0.000330357
Itgb7	-0.642909	0.000334017
Ankrd27	0.354933	0.000335307
Zfp2	-0.572738	0.000335575
Gm11476	-0.975609	0.00033615
Tgfbi	0.369576	0.000336819
Zfp185	0.521964	0.000337048
Auts2	-0.258004	0.000338012
H1f0	-0.411652	0.000339239
Dusp2	-1.45973	0.000344535
Klhl3	0.441303	0.000344968
Zbtb1	-0.455921	0.000346202
Dusp18	0.514208	0.00034743
Npb	1.34897	0.000348781
Tle5	0.313201	0.000353204
Lrsam1	0.538121	0.000355397
Os9	0.263131	0.000355397
Mphosph9	-0.425794	0.000355397
Trim16	-0.596677	0.000356822
Tln2	0.248494	0.000357951
Dnaaf3	0.768428	0.000360031
Dner	-0.659862	0.000363723
Relb	0.406497	0.000364744
Appl2	0.367336	0.000367779
Tmem241	0.310975	0.000373183
Mctp1	-0.668471	0.000376976
Cfap300	0.386736	0.000379939
5730455P16Rik	-0.36498	0.000380006
Ncam2	-0.907793	0.000383769
1700016P03Rik	1.00803	0.000387839
Gm16364.1	0.548278	0.000388417
Gm35217	-1.92921	0.00038936
Tex30	-0.47985	0.000391392
Gm28055	-0.556623	0.000394462
Gm15169	-1.15146	0.000397828
Tk1	-0.57433	0.000402032
Pon2	0.635338	0.000405292
Cdc42ep3	-0.744818	0.000405881
Adtrp	2.36568	0.000406253
Slc6a14	5.27776	0.000408405
Ifitm2	0.395979	0.000416029
Tex9	-0.582396	0.000416267
Dtx3	0.240871	0.000420945
Shpk	1.10664	0.000424862
Gm13703	-1.48021	0.000425773
Gm35438.1	1.04364	0.000427069
Nptx2	1.43656	0.000427804
Gtdc1	0.359283	0.000429501
Enho	-0.424902	0.000429662
Cyp2d22	0.764739	0.000429839
Itpkb	0.391017	0.000429839
Arnt2	-0.353274	0.000429839
Tro	0.565706	0.000435449
Procr	1.39642	0.000436167
Gm10848	-0.821261	0.000436167
Heatr1	-0.393029	0.000440449
Plcxd3	-0.901343	0.000441471
Nrsn2	1.12953	0.000441614
Pir	0.586489	0.000442572
Ncl	-0.236449	0.000448179
Mblac2	-0.585893	0.000448179
Gas2l1	0.449166	0.00044993
Top3b	0.279275	0.000451313
Arnt	0.261891	0.000451313
Nmnat2	1.1318	0.00045293
Bckdk	-0.510108	0.00045486
Amigo1	0.798531	0.000462732
Chrm3	1.16124	0.000462804
Dhx57	0.257964	0.000463392
Eif4ebp1	-0.580063	0.000463498
Maoa	-0.337353	0.000466437
Kif1b	0.281211	0.000467429
Eif5a	-0.336015	0.000468528
Zc3h4	-0.503275	0.000468833
Zik1	-0.539414	0.000470303
Stk26	0.828594	0.000471173
Prr7	-0.485889	0.000471176
Galnt2	0.28521	0.000473046
Gm34342	1.77866	0.000474362
Ptpn21	-0.500686	0.000477883
Sspn	-0.673845	0.000483423
Capns1	0.27852	0.000483719
Cltb	0.442489	0.000485813
Klhl22	0.273544	0.000487168
Selenom	0.586284	0.000488727
Synpo2	-0.655082	0.000493462
Per3	0.602921	0.000495207
Rbm38	-0.759263	0.000497657
Cnpy4	0.270819	0.000500356
Nt5c	-0.38256	0.000501461
Gap43	-0.769842	0.000502598
Camsap2	-0.24156	0.000503041
Arhgap17	0.240267	0.000508128
Gata2	-1.74833	0.00050969
Xxylt1	-0.392176	0.000514639
Btbd6	-0.837459	0.000515157
Sept5	-0.824093	0.000520399
Nsmce2	0.238068	0.00052162
Atp2a2	0.244566	0.000524538
Rangrf	-0.396097	0.000524538
Por	0.467823	0.00052781
Ddx58	0.398103	0.000528255
Ctdspl	-0.244444	0.00052926
Tbc1d4	-0.39097	0.00052926
Hmmr	-1.00691	0.000530931
Tcp11l2	0.543835	0.000531292
Ifi27	0.937834	0.000533431
2810433D01Rik	1.24674	0.000536723
Shkbp1	-0.426058	0.000539146
4930414N06Rik	0.540965	0.000540425
Haus7	-0.504192	0.000544458
Gm13889	-0.627561	0.000544458
Nuf2	-1.05616	0.000547164
Gm19303	-1.85304	0.000547668
Ebf1	0.5191	0.000553207
Ccdc30	0.826529	0.000555363
Cntn1	-0.79326	0.000559625
Ttk	-0.679081	0.000560662
Trim8	-0.454514	0.000573194
Mdga2	-0.830039	0.00057354
Cxcl1	1.12722	0.000579881
Cab39	-0.273666	0.000583145
Nudt5	-0.263342	0.000587063
Vsig10	0.612423	0.00058777
Zbtb2	-0.580086	0.000588578
Ucma	-1.83566	0.00059407
Lrrtm1	-0.824184	0.000595398
Ssbp4	0.263818	0.000597107
Cdip1	0.254107	0.00059855
Ube2c	-0.840032	0.000600559
1700001K23Rik	0.906177	0.000603429
Rbfox1	0.747227	0.000607777
Vegfc	0.284214	0.000608591
Gmpr	-0.473519	0.000618913
Fuom	0.491031	0.000620044
Txnrd3	-0.572149	0.000620371
Mapk8ip3	0.227129	0.000622337
Asns	-0.378554	0.000622355
Tbc1d23	0.336648	0.000628473
Gm11755	1.11621	0.000630425
Matn3	-0.798478	0.000632148
L3mbtl2	-0.723592	0.000632338
Kif1a	-0.508437	0.000636134
Dstn	-0.321195	0.000638795
Ccdc124	-0.368982	0.000643444
Samd12	0.477858	0.000644989
Gm5099	-0.759263	0.000650639
Coq3	-0.364928	0.00065117
Sez6l2	1.06589	0.000652717
2700069I18Rik	-0.461084	0.000653119
Map2k6	-0.534009	0.000654071
Pafah1b1	0.133869	0.0006562
Gm9866	-1.65856	0.000657673
Tgfb1	-0.613988	0.000664001
A430018G15Rik	0.809418	0.000665279
Camk2b	0.71321	0.000665279
Faim	-0.34293	0.000668626
Blcap	0.289571	0.000670447
Slc35d1	-0.301729	0.000670834
Pltp	-0.594845	0.000672084
Patz1	-0.406557	0.000673987
Uba5	0.278795	0.000680644
Tmem161a	-0.305659	0.00068236
Zfp644	-0.318142	0.000690836
Fkbp3	-0.30565	0.000694774
Mthfd2	-0.449717	0.000698376
Psmc3ip	-0.465057	0.000698792
Tmem98	-0.566009	0.000701917
Fam20c	0.805553	0.000702504
Afg3l1	0.250328	0.000714275
Gm30003	0.543104	0.000714512
Adamts8	0.924186	0.000719097
Adamtsl1	-0.349519	0.000719381
Amz2	0.273123	0.000719564
Stmnd1	1.53364	0.000720473
Cul9	-0.391997	0.000738978
Zdbf2	0.775675	0.00074141
Triobp	0.502295	0.00074141
Ankrd26	-0.321995	0.000743946
Rnf150	0.42455	0.000765213
Wdr86	-0.7039	0.000765213
Coro1c	-0.379451	0.000767268
Hspa1b	-1.08805	0.000771168
Armh1	0.611659	0.000779327
Sms	-0.566048	0.000787364
Gm17057	0.643187	0.000789632
Serp2	0.554263	0.000791884
Cxcl5	1.56723	0.000796246
St8sia4	-0.568866	0.000798653
Tnfsf13b	1.16687	0.000799685
Sec11c	-0.365682	0.000809546
Bfar	0.203648	0.000811108
Spata5	-0.236864	0.000817333
Phf6	-0.26926	0.000822235
Gm11417	2.13877	0.000823761
Alx4	-0.975609	0.000823893
Meis1	0.330922	0.000825622
Ier2	-0.576796	0.000826933
S100a1	-0.990499	0.00083324
Bmpr1b	0.474801	0.000834085
Cul4b	0.324986	0.000836656
Sipa1l1	-0.370931	0.000836656
Sipa1l2	0.578626	0.000836933
Calb1	-1.45707	0.000836933
Chtop	-0.232382	0.000837438
Galnt14	0.720072	0.000844204
Esr2	0.664364	0.0008468
Gpr155	-0.5403	0.0008468
Cdr1os	0.990458	0.000851852
Scin	-1.17787	0.000853229
Azin1	-0.300823	0.000859318
Acbd6	-0.162196	0.000859356
Ss18	-0.268209	0.000859356
Kctd15	-0.618717	0.000859356
Gm26854	-1.23392	0.000859356
Gm3468	-1.32091	0.00087344
Gm47271	-0.42615	0.000873688
Hspa12a	0.811379	0.000874602
Pkig	0.353389	0.000876096
Ppp1r14c	-0.956969	0.000882258
Klhdc3	0.279196	0.000883627
Ccdc18	-0.689726	0.000891423
Trpc4ap	0.245657	0.000892876
Myo9a	0.189763	0.000899211
Osmr	1.18626	0.00090906
Cd38	0.990404	0.00090906
Lipi	-4.31376	0.000910756
Mettl1	0.332973	0.00091365
Dcaf17	-0.324075	0.00091365
Gm28730	1.2108	0.000915251
Extl1	-1.87031	0.000918911
Lgals8	0.371449	0.000919591
Thnsl1	0.611799	0.000919949
Trp53	-0.381726	0.000923584
Brd8	0.160706	0.000924011
Me3	-0.836139	0.000929996
Sephs1	-0.25262	0.000934657
Tfcp2	0.333546	0.000935086
Adra1a	0.799097	0.00093927
Stag2	0.173541	0.000941615
Reck	-0.311166	0.000945514
Prkca	0.452996	0.000948203
Gse1	-0.457268	0.000951716
Plce1	0.681434	0.000952412
St6gal1	-0.489724	0.00095783
Atp9b	0.189969	0.000958343
Gpr50	1.46223	0.000959052
Xbp1	0.303786	0.000959052
Lhx8	-0.556257	0.000961579
Adam15	0.465209	0.000962501
Mtfr1	-0.250337	0.000964602
Rsph3a	0.481108	0.000965754
Cept1	0.23025	0.000968081
Ptbp2	-0.283861	0.000984874
Cks2	-0.597681	0.000987968
Gm47101	-3.60214	0.000987968
Slfn2	-2.436	0.000988556
Cap2	0.687749	0.00099499
4930402F06Rik	1.22899	0.000996206
Zfp667	0.507325	0.000997282
Syde1	-0.458274	0.000998984
Gm31522	2.69107	0.00100602
Rhbdl3	0.520663	0.00100649
Irak1bp1	0.306731	0.00100969
Poglut1	-0.280925	0.00100969
Dzip1l	-0.45018	0.00101199
Seh1l	-0.24274	0.00101214
Slc9a9	-0.626038	0.00101214
Gm29007	2.63112	0.00102129
Gm48617	0.94177	0.00102573
Midn	-0.34755	0.00102573
Srsf6	-0.233618	0.00104221
Ttc3	0.288306	0.00104839
Dcc	0.795918	0.00104939
Gm47644	0.801168	0.00105082
Gm17399	0.947983	0.0010595
Tnik	0.721338	0.00106029
Gm43434	1.97909	0.00106393
Haus8	-0.35999	0.00108994
Dctpp1	-0.343462	0.001093
Sorbs3	0.574207	0.00109457
Ubr5	-0.23224	0.00109497
Tmem86a	0.464734	0.00109546
Gbp7	1.15301	0.00110034
[truncated: 18,572 more rows]
