# Supplementary material for: Eed controls craniofacial osteoblast differentiation and mesenchymal proliferation from the neural crest
Source: eLife. 2025 Dec 2;13:RP100159. doi: 10.7554/eLife.100159 (PMC12671911; doi:10.7554/eLife.100159)
Supplement: Supplementary file 4. [file elife-100159-supp4.xlsx]

## Sheet: Supplementary_File_4
Supplementary File 4. Differential gene expression between C5 and C0 from single-cell RNA sequencing.
gene	log_fc	padj
Mecom	-2.79794	9.14208877915262e-292
Sparc	1.54276	1.03196231672122e-240
Akap12	2.43336	1.33755504415971e-190
Col1a2	1.68043	1.76485911708689e-188
Gxylt2	1.10307	2.59581763235958e-173
Veph1	3.97309	4.83676258084785e-168
Tnmd	2.98755	4.25074266306506e-151
Satb2	-2.40986	4.69083836889712e-147
Lox	1.91516	8.91575957413465e-124
Wnt11	1.60332	3.72125704384723e-121
Trps1	-1.68981	4.25871732815161e-106
Ntn1	1.93142	7.22742270077376e-106
AW551984	1.56995	9.61501734031147e-101
Cavin3	1.81684	9.61501734031147e-101
Col1a1	1.82699	8.63304866131872e-99
Galnt17	1.71743	1.68609795755407e-96
Ptch1	-1.54061	4.10491210435889e-96
Cpz	3.31926	2.41447578963414e-92
Fibin	1.51609	9.39519531992372e-92
Thbs1	1.27894	1.32381084937951e-88
Fbn1	1.02811	3.52113124710143e-87
Dpp4	3.43448	8.95466836715753e-86
Rian	1.3151	1.1049417891058e-85
Tgfb1i1	0.833586	3.70063654002955e-80
Necab1	1.86667	4.01034425196769e-79
Cyp26b1	-1.82652	5.04990905395787e-79
Twist2	1.60495	1.1794302264859e-78
Grem2	2.07678	1.75405407998051e-78
Dcn	2.78794	5.28166130973328e-78
Col6a2	1.12546	1.5277113578142e-77
Prdm16	-1.69692	3.78073135295556e-77
Lrrc17	1.38855	6.6074441547394e-77
Crym	-2.62192	2.54206934778488e-76
S100a10	1.49192	3.18899217371666e-75
Col6a1	1.37456	4.74267100478504e-75
B830012L14Rik	1.44686	6.41875322630807e-74
Cryab	3.2046	6.75367514518445e-74
Col5a2	0.887103	2.22781620620732e-73
Map1b	0.950608	5.4257922021794e-73
Gm44593	-4.06735	1.47926081566358e-72
Arhgdib	1.97062	7.95957080404677e-72
Cux1	-0.868518	4.63946357386558e-71
9130024F11Rik	-2.78672	5.87388921788383e-71
Rnase4	1.72056	2.03050231465485e-70
Lgals9	2.13711	3.38041246274084e-69
Dpysl3	1.26195	3.43802610371086e-69
Aass	2.04855	2.39298500069739e-68
Hic1	1.71402	4.07612701257137e-67
Adam12	1.47007	5.34192367092808e-67
Meg3	1.20768	1.06798365307115e-66
Npas3	1.10898	6.13364667208195e-66
Tgfbr3	1.27777	7.86353328317549e-66
Wnt4	1.93162	1.60116004679932e-65
Serping1	1.7048	4.40526602426899e-65
Il1rapl2	2.27342	9.12665193703826e-65
Crlf1	-1.4643	2.78953659669735e-63
Cdon	1.36134	3.14240087117793e-63
Grn	1.01724	3.62913267477722e-63
1700018A04Rik	-2.96947	4.42565270009989e-61
Ypel2	-1.24797	5.16402766215e-61
Nnmt	3.42753	2.15842800641691e-60
Hmx1	2.71265	2.44439104839502e-60
Cecr2	-1.30679	1.03998529325548e-59
Nid1	0.944277	1.37878542940062e-59
Sulf2	0.77628	1.37922436099113e-59
Acta2	3.9346	1.70119388344506e-58
Gpr153	1.18551	3.41761707117762e-58
Eya1	-1.71434	3.96568074802396e-58
Enox1	0.862255	2.00446125023271e-57
Ier2	-1.13741	3.12129614610663e-57
Lipa	1.20279	1.9133387945495e-56
Egfl6	1.59842	3.24345609219753e-56
Gatm	2.60131	4.07084624829515e-56
Mpped2	-1.19948	8.18453530763034e-56
Adamts16	2.88203	9.54938385895702e-56
Sorcs2	1.06455	1.32253007133309e-55
Serpinb1a	3.83833	9.74218746063047e-55
Rcn1	0.882141	1.19406275492865e-54
Adamts2	1.2416	1.36607696668764e-54
Col3a1	1.54147	2.71474684625964e-54
Lhx8	-2.11545	4.09261380625283e-54
Cdc42ep2	2.36441	1.48208398079512e-53
Tbx2	-1.74527	2.56355647076749e-53
Svep1	1.18244	6.32974103429504e-53
Dlk1	2.14556	7.25870991684964e-53
Dnah8	1.78073	8.60741311233072e-53
Lum	2.08125	1.12902486785654e-52
Map2	-1.0617	1.37999716755983e-52
Chd7	-1.27656	1.69466036955874e-52
Cdkn1c	0.646624	2.24214692536112e-52
Zfp469	1.34533	2.24214692536112e-52
Fam114a1	1.0067	4.76568109110958e-52
Ptx3	1.85761	5.96069449271014e-51
Vim	1.24076	7.19705426170205e-51
Adam33	1.82902	1.09799080411878e-50
Pax3	-2.63974	1.42620495231428e-50
Sox9	-1.79982	2.70198356003373e-50
Rcn3	0.813282	2.99356719173123e-50
Ch25h	1.97014	6.74733479425771e-50
Aopep	-0.923422	2.77056362376233e-49
Nppc	2.35364	3.55893337512342e-49
Hoxd1	3.1908	4.98804451526843e-49
Ptchd4	2.05119	5.12194498677065e-49
Pcolce	1.31575	1.81541416405636e-48
Vat1	1.0545	3.75863045520845e-48
Apod	2.42891	8.49475687009404e-47
Pthlh	-3.04622	8.52076624545411e-47
Cd34	1.85393	1.87444246727331e-46
Adamts17	0.795141	2.50057106333381e-46
Dab1	1.00864	5.57469552360045e-46
Ptprj	-0.919668	9.92929831197417e-46
Brinp1	1.86978	1.0320979685389e-45
Chka	-0.74919	1.28643034141742e-45
Irx1	1.40086	2.54085816002141e-45
Egr1	-1.40107	2.62044668847491e-45
Gm48742	1.68872	1.20885865128803e-44
Slc4a4	0.839074	2.66765209057935e-44
Ankrd55	1.86534	8.044308875295e-44
Haglr	3.4489	1.03072309649524e-43
Vgll3	1.75235	1.69828954101925e-43
Ptgs2os2	3.59043	1.84368070686708e-43
Apba2	1.29237	2.06654428588614e-43
Stard9	0.881502	2.74430035584713e-43
Ctnna2	1.21686	4.01261017283728e-43
Tpst1	0.76491	2.24811351647233e-42
Lpar1	0.588088	2.41226548432262e-42
Wnt2	2.69923	7.76278794795139e-42
Tagln	1.54907	8.4678503950926e-42
Cdc42ep5	0.787156	1.74356909880301e-41
Gm45187	3.09784	1.7514023871754e-41
Sema3c	1.78932	2.30821788984749e-41
P4hb	0.463335	2.38404650015564e-41
Celf2	1.48902	4.26388110782885e-41
Srpx	1.29972	1.42474419486863e-40
Fmo1	1.79909	1.88948687271268e-40
Adgra3	-0.958379	2.38446492861244e-40
Hist3h2ba	-1.16048	2.39187440189255e-40
Dlx2	-1.94137	3.13567829823452e-40
Creb3l1	1.25497	3.72577539827507e-40
Zfp185	1.44136	5.40441320422143e-40
Mia	-2.28721	2.72489490031424e-39
Anxa2	1.05733	2.72489490031424e-39
Myo1d	-0.960838	3.19552920815985e-39
Arhgef28	-1.21717	4.64832872346687e-39
Mecomos	-2.66967	1.11897864917255e-38
Sobp	-0.832477	1.22066157136725e-38
Sh3rf1	-0.810276	1.7443387777192e-38
Capn6	-1.05802	1.91877142576555e-38
Vav3	0.948724	2.04606034670757e-38
Xkr4	1.47743	2.35337295651543e-38
Lgals1	1.0843	6.40369870870984e-38
Pycr1	1.13447	1.03591276796262e-37
Adh7	2.41884	1.24842852572238e-37
Bmpr1b	-1.1785	1.69893262768143e-37
6720468P15Rik	2.23716	2.3836301238158e-37
Ckap4	0.663732	2.39624376143128e-37
Sh3bgrl3	0.965752	4.42304375849544e-37
Fbn2	0.559061	4.55151395493219e-37
Scube1	-1.15024	4.56630534708797e-37
Lvrn	1.39334	6.09917817311818e-37
Sox5	-1.39455	1.84612480181158e-36
Klf4	0.841144	2.10672887930151e-36
Msi2	-0.785604	2.89568865613433e-36
Gnas	0.484132	4.28935649947977e-36
Gm37240	-0.841709	4.59354264591307e-36
Ctsk	1.49371	6.56876949326951e-36
Runx2	-1.17163	7.50783821553786e-36
Sox6	-1.77683	7.69344895630932e-36
Cavin2	1.09873	9.25182484695226e-36
Pou3f4	-2.31065	9.35792117129807e-36
Lrrc8d	-1.10401	1.10612487059315e-35
Ldhb	-0.706094	1.41743868227802e-35
Cdk17	-0.687637	1.56736552633999e-35
Ivns1abp	-0.604421	1.58813144181742e-35
Ptprz1	-0.910755	2.63583674772471e-35
E130308A19Rik	-0.901012	2.73008388390404e-35
Tango2	0.987549	2.85412985209193e-35
Ccn1	-1.06651	2.87793093226223e-35
Spock1	-2.2924	3.53648130475628e-35
Npnt	-1.44719	6.69664927396594e-35
Tmem132c	1.07561	8.60436975080964e-35
Col9a1	-1.23375	1.60491925827275e-34
Fancc	-0.845039	2.10625856394983e-34
Dcbld1	-0.93172	2.89442916816373e-34
D16Ertd472e	-0.936605	3.98615680803371e-34
Fli1	-0.72674	1.0509689854682e-33
Car10	1.817	1.0509689854682e-33
Gm16599	-1.10635	1.79533494862463e-33
Eya2	-1.55191	2.14110329299287e-33
C1qtnf3	4.39888	2.16343984381206e-33
Mfap5	3.3095	2.63744102833145e-33
Nt5dc3	-1.10136	2.72001769003382e-33
Nebl	1.26301	2.9429556158854e-33
Cobl	-1.08431	2.98042745986601e-33
Mybpc1	1.5213	2.98042745986601e-33
Tmem200a	1.05685	3.60057807889716e-33
Prkcg	1.43116	3.60057807889716e-33
Ehd2	1.01816	3.65859387061885e-33
Ehd1	0.667843	7.46570231126306e-33
C130021I20Rik	2.48684	1.0465386688974e-32
Stard8	1.63501	1.06492158884263e-32
Col5a1	1.01178	1.42516150946206e-32
Bbx	-0.520376	1.6222644264926e-32
Itpk1	-1.03409	1.91768190076082e-32
S100a11	1.28707	1.99163098797853e-32
Ahnak2	2.90301	2.14849914353817e-32
Gm20125	2.24824	2.25204611561695e-32
Tfpi	1.50802	2.32265618209691e-32
Tfap2a	-2.08918	2.32265618209691e-32
Zpld1	3.55452	2.38320587436248e-32
Tex15	1.14086	2.72150805149665e-32
Six1	-0.812869	2.78243879015024e-32
Gpx7	0.874962	2.84390861425096e-32
Sdk1	0.664236	4.43452682984055e-32
Mirg	1.45748	6.41234051672628e-32
Pcdh19	1.39258	7.25049628710907e-32
Timp3	-0.644566	7.94882505580129e-32
Rpl39l	2.16192	9.06104917152626e-32
Slc45a2	3.50026	9.47191536384603e-32
Adamtsl1	0.744465	1.03476852154239e-31
Nts	-3.55586	1.14402759368538e-31
Flnc	0.970998	1.44817717115823e-31
Slc4a7	-0.833369	1.57403801726086e-31
Abca8a	1.93323	3.96979612905302e-31
Cxadr	-0.876761	4.10717163359849e-31
6530403H02Rik	2.72472	4.35179226979085e-31
Plcl2	-0.772561	6.00739937578477e-31
Xpnpep2	1.99029	6.13348545181123e-31
Colgalt1	0.617787	6.33939242606342e-31
Crip1	1.74323	8.83998372227641e-31
Elk3	-0.66208	1.45059688246392e-30
Gm29101	1.75155	1.48311048135296e-30
Serpinh1	0.846839	1.83532348745018e-30
Fzd10os	1.07892	2.52518302672821e-30
Ngf	1.0418	2.91439961876203e-30
Nxn	0.622472	3.87219359051905e-30
Cd200	-1.85653	4.40755341151e-30
Serpinf1	0.638365	4.62351986361597e-30
Add3	0.779219	4.83690279998525e-30
Pawr	-1.27321	7.11873026261677e-30
Sema3e	-1.40927	7.4770136025622e-30
Mllt3	-0.973001	1.14976753990766e-29
Arap1	1.56245	1.53023823176356e-29
Sh3rf3	1.03385	1.56141332203448e-29
C1qtnf6	0.910428	1.57631439713137e-29
Alx1	-1.89925	2.1015954185465e-29
Spats2l	0.804309	2.37928396328998e-29
Spock3	1.10975	3.20146521839126e-29
Gm10125	1.09748	3.31883243818403e-29
Copb2	0.472951	5.8311830159473e-29
Alpl	-2.20747	6.51298192473151e-29
Ogn	1.06018	8.53805815721646e-29
Sorbs2os	-1.81532	9.17541156342847e-29
Tspan5	1.00242	1.00182124657721e-28
Cadm2	-1.04533	1.14741193146814e-28
Pim3	-0.808675	1.25461089059881e-28
Fkbp14	0.890444	1.26855694698463e-28
Ghr	0.778337	1.3391129870342e-28
Dusp5	-1.4365	1.68413178951372e-28
Gli3	-0.451226	1.93753809689857e-28
Ccdc80	0.864462	2.72330968373727e-28
Kctd8	1.32545	2.77647103580133e-28
Sfrp2	1.45563	8.4268060107843e-28
Gna14	1.51899	1.21090347465414e-27
Pdgfrl	1.267	1.55788628177887e-27
P3h1	0.621103	2.44459131217575e-27
Pde1a	-2.0922	2.89727930598121e-27
Gm5127	-3.40575	3.3649544646801e-27
Col24a1	1.09088	3.9483827655516e-27
Col20a1	0.893667	4.41247171856882e-27
Ahnak	0.90932	4.41247171856882e-27
Trac	3.3982	4.42244720510028e-27
Wls	0.523578	5.9898848071263e-27
Efemp1	0.771414	7.86526428257672e-27
Peg3	0.646141	8.27603513765154e-27
Fendrr	-2.80069	1.14551062573609e-26
E130114P18Rik	-1.49612	1.37528400257861e-26
Wnk2	-1.30966	1.50216504677343e-26
Poglut3	0.905709	2.04933046478412e-26
Sema5a	0.58954	2.46553109696696e-26
Tbx15	1.35067	2.50890146850016e-26
Dgkd	-0.570946	2.655618397054e-26
Msi1	-0.857744	2.67901090139739e-26
Bpgm	-1.10476	2.7027815721073e-26
Cacna1d	-0.853788	3.04092600343096e-26
Ctbp2	-0.704975	3.07328468381368e-26
Radil	1.12423	3.24491974128018e-26
Dio3	2.09335	3.53606435257389e-26
Adgrg6	1.38035	3.89492615875219e-26
Nid2	1.10185	4.3383128273938e-26
Cd248	0.959722	4.62422658174828e-26
Nagk	0.833688	4.72700109363023e-26
Cxcl14	1.4902	4.86512000475374e-26
Gm40383	2.76411	4.93391023262475e-26
Add1	0.590422	5.26048686977891e-26
Agtr2	1.913	5.81391600560209e-26
Emx2os	1.37017	7.48864317979079e-26
Megf6	0.615601	7.98492776857465e-26
Zfp711	-0.683362	1.00283725179002e-25
Thbs2	1.55186	1.06520083999277e-25
Tek	2.47996	1.34089519374453e-25
Phc2	-0.480198	1.47611207965235e-25
Scg2	2.19972	2.10999080154522e-25
Sp4	-0.742972	2.38866546727602e-25
Ccdc152	1.16697	2.44683390365717e-25
Bcl7c	0.420546	2.49125273278852e-25
Antxr2	0.763777	2.75027066054505e-25
Nt5e	1.85727	4.02515455442183e-25
Eva1b	0.829753	4.34859276536597e-25
C1qtnf2	2.39205	6.86361098983158e-25
Cyb5a	0.781482	7.71768446997142e-25
Dlx6	-1.90193	7.90745077848941e-25
Ntm	1.06552	8.01213689338502e-25
Gm28730	2.50138	8.2245285670027e-25
1190005I06Rik	0.705228	9.06684013227889e-25
Six4	-0.950066	1.0386020857886e-24
Psap	0.589668	1.07304781425655e-24
Dleu2	0.790543	1.35912967665724e-24
Nck2	-0.624877	1.42342503946145e-24
Txndc5	0.558398	1.44238668444773e-24
Kdelr3	0.84067	1.47823634771196e-24
Gm49767	2.7343	2.06604830384499e-24
Serinc2	-0.87743	2.09067303435183e-24
Abcc1	-0.95858	2.18138583604988e-24
Gamt	1.02974	2.19773941388299e-24
Plin2	0.619772	2.25928990869777e-24
Kynu	4.31068	2.41425657748486e-24
Lix1	0.989028	3.4771634353869e-24
Kcnrg	1.23892	4.12510595312082e-24
Fkbp9	0.488891	4.40308140983947e-24
Rhoc	0.668204	4.55478480654987e-24
Efemp2	0.735729	5.29466580739558e-24
Yif1a	0.826584	6.20984522387189e-24
Otor	-1.87777	7.14524009341947e-24
Rrbp1	0.644874	7.61739887871007e-24
Heg1	0.993513	7.80859337858338e-24
Osr2	0.872532	7.97356717561727e-24
Glt8d2	0.649179	8.96216452937769e-24
4930447K03Rik	1.54279	9.14399519078531e-24
Carmil1	-0.69744	9.48262566073679e-24
Dlx1	-1.64514	9.52610916832731e-24
Myl6	0.825417	1.30045251092757e-23
Npr3	1.47046	1.42264036498455e-23
Rgs2	-0.963797	1.70250071098484e-23
Mtch1	0.574811	1.70508281038416e-23
Smap1	0.401115	1.85632598745694e-23
Ecscr	2.64507	1.85632598745694e-23
Reep5	0.519533	1.91832257422803e-23
Xpnpep1	0.500414	1.99796056083786e-23
Rnf180	-0.845786	2.10414760647656e-23
Susd5	-2.41273	2.10414760647656e-23
Prkd1	-0.54497	2.21731712785872e-23
Snca	1.96046	2.68912957608277e-23
Tpm2	0.931234	2.7254386353823e-23
Gm45025	-2.43427	2.85480519427852e-23
Thra	0.516783	3.09155487179164e-23
Igfbp4	0.529606	3.90788625689618e-23
Nav3	0.857653	3.95171241039441e-23
Tent4b	-0.565635	4.24439850885871e-23
Rassf2	2.49589	4.24439850885871e-23
Stk26	-0.931466	4.27517581608661e-23
Usp6nl	-0.643947	4.30595516892474e-23
Sp7	-2.46561	4.47490378756528e-23
Kcnab1	0.718672	4.76865033898076e-23
Mgat5	-0.689509	4.76865033898076e-23
Aox1	1.84578	4.96120481486016e-23
Phldb2	0.5359	5.74401000173648e-23
Myadm	1.16147	8.84172412032115e-23
Calm3	0.548086	1.08018846249654e-22
Gclc	-0.984391	1.16227646434195e-22
Lmntd1	1.98318	1.92507347556128e-22
Tmeff2	2.01474	1.93424964930717e-22
Lhfpl2	0.688475	1.99756783814876e-22
Rorb	-1.56878	2.15288017874919e-22
Caln1	-1.44463	2.17134613179952e-22
Plpp3	0.593995	2.37673847453386e-22
Abca6	1.48498	2.63764376926475e-22
Cmtm3	0.528295	2.70812620502537e-22
Anxa3	1.17195	2.79667898566724e-22
Pcgf5	-1.12773	3.31323575806947e-22
Zic3	2.38092	3.33366786140867e-22
Vcam1	1.68876	3.66223805734079e-22
Myh8	6.3828	4.35054688852592e-22
Col12a1	1.0545	4.55959783382587e-22
Surf4	0.561602	4.63313020863879e-22
Adh1	3.80066	5.25351069595676e-22
Smoc1	-0.920111	5.60884364123829e-22
Ank	-1.31134	5.7407737275188e-22
Kif21a	-0.716311	5.94058528121982e-22
Lhx6	-1.91687	8.10903764973612e-22
Fndc1	1.51955	8.26884752092017e-22
Lrig1	0.729508	8.59258519770781e-22
Kera	2.01804	9.13856821543099e-22
Tiam2	-1.07318	9.46932338117059e-22
Lemd3	-0.500166	9.68724292078662e-22
Nhsl2	0.672678	1.09873004289201e-21
Bend5	0.809225	1.10612604003739e-21
Pcdh17	-1.05736	1.12422638183618e-21
Mb21d2	-0.715109	1.34460944538818e-21
Dpt	3.83169	1.35807880030732e-21
Sri	0.544057	1.35807880030732e-21
Rfx2	1.04377	1.84300640698239e-21
Cast	0.667851	2.10178992050864e-21
Rmnd5a	-0.361197	2.20520785764699e-21
Dlx1as	-1.46071	2.56769508327834e-21
Cpq	0.623124	2.61030768413004e-21
Ston2	0.995048	2.64244790611295e-21
Gm47507	1.52047	2.81909165426719e-21
Foxc2	-1.61934	2.89519831088418e-21
Scara5	1.78008	3.06942994824578e-21
Fam163a	1.49305	3.11681576097416e-21
C430049B03Rik	1.22572	3.82794884529932e-21
Timp2	0.375641	4.3176569960716e-21
Sept11	0.388148	4.90765653601507e-21
6030407O03Rik	1.49008	5.83430205599972e-21
Ptpn1	-0.582961	5.86732988362993e-21
Maml3	-0.732088	6.34087832444309e-21
Serpinb6a	0.726374	7.43243313125311e-21
Hdlbp	0.414241	7.55625583543947e-21
Maged2	0.615552	8.23320398204428e-21
Ntf3	-0.793401	8.39002206029127e-21
Ilk	0.465347	8.42573257433014e-21
Gsc	-1.52799	8.70145434629229e-21
Phka2	-0.634241	9.87950336069053e-21
Tmem100	1.13691	1.10326651107677e-20
Zdhhc9	0.60535	1.2045734230115e-20
Kcnd2	0.884624	1.40295672242991e-20
Rsu1	0.50908	1.45266121754612e-20
Atp6v0d1	0.427704	1.46550539172038e-20
Capns1	0.543099	1.58254654032267e-20
Gprin3	-2.08334	1.70290108640293e-20
Dok6	-0.845602	1.71872085857122e-20
Fhl2	-0.952148	1.77123793848958e-20
Eid1	0.386995	1.81505036942132e-20
Lrriq1	-4.50312	1.92386829152525e-20
Adk	0.322583	2.08133094769795e-20
4930444A19Rik	-0.704739	2.27782691885249e-20
Wsb1	-0.518123	2.35382202345588e-20
Vwa5a	0.824409	2.35382202345588e-20
A330015K06Rik	1.01204	2.86910490150087e-20
Esyt1	0.800896	3.56167438054145e-20
Lrrc8c	-0.54585	3.95312185458037e-20
Zfhx3	0.718008	4.08834011581424e-20
Btaf1	-0.435248	4.08834011581424e-20
Ccn4	0.999692	4.14562881564335e-20
Colec12	0.568704	4.22923871610835e-20
Prdm16os	-3.00413	4.46878271633061e-20
Tubb2b	1.30769	5.00579193479187e-20
Tanc1	-0.774257	5.3064140194078e-20
Aebp1	1.27236	5.39592659981409e-20
Man1a	0.926806	6.2733223978845e-20
Sorbs2	-1.54259	6.48552250680264e-20
Pitpnc1	0.513876	6.69068629146405e-20
Selenom	0.942682	6.94886133627241e-20
Ctnnal1	-0.9471	7.47002941239384e-20
Myo1e	-0.564168	8.17567371402505e-20
Fgfr2	-0.549432	8.25588741260425e-20
B3galt1	-0.493924	8.30390129895677e-20
Gm10115	1.98607	9.86411682322615e-20
Sept3	-0.790983	1.00415457830008e-19
Bcl2	-0.585391	1.10229487915523e-19
Ttc39b	-0.923	1.11047210742289e-19
Sar1a	0.424143	1.17080844484488e-19
Plin3	0.513497	1.20919262426055e-19
Kcnk2	0.86931	1.23777973926117e-19
Rapgef5	-1.55353	1.29771179975085e-19
Ift57	-0.630424	1.49281187051345e-19
Chst12	1.03805	1.51447741159191e-19
Calb2	2.78959	1.6038939140719e-19
Ptpn14	-0.720216	1.6038939140719e-19
Ptpn2	-0.451977	1.74495379613295e-19
Uchl1	1.08509	1.86704342647587e-19
Rit2	1.96493	1.98370198975391e-19
Cdc14b	-0.499085	2.01699746693094e-19
Calr	0.445943	2.16662710766931e-19
Lrrc32	1.69655	2.4221683026778e-19
Frem1	-0.852279	2.72317737799069e-19
Rasl11a	-1.94352	2.74613066932687e-19
Emcn	-2.07666	2.74677164030078e-19
Tbc1d4	-0.725724	2.78761396404999e-19
Htr7	1.86101	3.10148736465226e-19
Hoga1	1.02553	3.22421517114755e-19
Apba1	0.678814	3.22421517114755e-19
Amacr	1.10668	3.23699478224325e-19
Foxd2os	-1.81365	3.42343881421612e-19
Fkbp10	0.66751	4.05489421880612e-19
Gstm2	1.17466	4.28697495228618e-19
Fank1	1.64731	4.29965341646923e-19
Inhbb	2.18541	4.59917136412446e-19
Lef1	-1.06593	5.03695423411837e-19
Marcks	0.778351	5.22434614068414e-19
Gask1b	1.4348	5.29042672420519e-19
Prickle1	0.600448	5.4102131365509e-19
Cemip	1.71883	5.42394040415711e-19
Trpc5	-1.53244	5.77277967845052e-19
Pla2r1	1.39033	5.99390179750652e-19
Gm47271	-0.947665	6.35177972285235e-19
Prkg2	-1.46092	6.43159596532077e-19
Efr3b	-0.847187	7.30186972218514e-19
Prkcq	-1.61102	7.73133988743649e-19
Fgf18	0.796123	7.8470213153442e-19
Eif4e2	0.400814	8.33828505916838e-19
Cpe	-0.532649	9.44365712719827e-19
Barx1	-1.51178	9.71679534121622e-19
Glod4	0.474661	1.1145990578876e-18
Pds5a	-0.376676	1.17642177001549e-18
Adamts7	0.907965	1.24608666410697e-18
Casz1	1.26197	1.38451781253732e-18
Rarres2	1.66469	1.42904793720466e-18
Asb4	-1.33141	1.42904793720466e-18
Hey1	-1.47378	1.56627979110645e-18
Anxa6	0.646652	1.75695602712274e-18
Lrp5	-0.700072	1.96007509035172e-18
Rtl1	0.917857	2.11045260133919e-18
Etl4	0.844082	2.46545795546438e-18
Tle1	-0.547525	2.57067174431285e-18
Dtnb	-0.416339	2.67348401736737e-18
Pcdh9	0.963925	2.92477229234718e-18
Reck	0.630999	2.9762919103573e-18
Pde7b	0.776702	3.32146326481139e-18
Arhgef26	-1.28909	3.33148716648392e-18
Tbrg1	0.626907	3.34458966864335e-18
Vcl	-0.659264	3.37995792253687e-18
Col16a1	1.03618	3.46166535272682e-18
Ddah1	0.582512	3.51906516095223e-18
Med14	-0.49699	3.55942755061172e-18
Cdh4	1.06813	3.57088765747893e-18
Abca9	1.50696	3.62165094318702e-18
Zfp654	-0.558285	3.8545217351778e-18
Slc25a25	-1.13861	4.06952861043888e-18
Fn1	0.875413	4.82312644950026e-18
St6galnac5	1.02091	5.05648776127689e-18
Fndc3c1	-1.45411	5.94798773389514e-18
2610035D17Rik	-0.955627	6.66236894849325e-18
Ube2q2	-0.571621	6.69691367056175e-18
Rell1	-0.682524	6.72103385981751e-18
Cers6	0.366156	7.95930099290944e-18
Ptpre	-1.14732	8.03030208004003e-18
Frat2	-1.08601	8.82982291790649e-18
Ctsb	0.552795	8.82982291790649e-18
Mturn	0.771558	8.82982291790649e-18
Nr5a2	-2.36725	9.03089337335469e-18
Ston1	0.548603	9.26557031093871e-18
Mlec	0.494055	9.3641516879891e-18
Wwp2	-0.882611	9.46981860448247e-18
Il17d	0.886636	1.1479966198971e-17
Asb13	-1.30728	1.23113550165007e-17
Armcx2	0.447004	1.37598478309745e-17
Ralgapa2	-0.616921	1.63613265305692e-17
Slc35d1	-0.616597	1.70236785304294e-17
Pcp4l1	-1.68035	1.96507153849428e-17
Egfem1	-1.91871	2.00201020610075e-17
Capzb	0.335924	2.33327121665918e-17
Ndn	0.646125	2.43699502002242e-17
Parp8	-0.481094	2.67610184237245e-17
Rassf3	-0.642433	2.67851573284174e-17
Epb41l3	0.391412	2.73949695807344e-17
Zfp280c	-0.43798	3.43198861375561e-17
AI427809	2.36366	3.55701159707024e-17
Map3k1	-0.686764	3.55701159707024e-17
Vps8	0.754329	3.62911773884541e-17
Fgfrl1	-0.61172	3.6796896639991e-17
Elf2	-0.327283	3.95869588450151e-17
Olfr920	1.53926	4.22327611215397e-17
Npy1r	2.10595	4.22591013310158e-17
Smad7	-0.646918	4.39489488659549e-17
Hmgcll1	-0.71764	4.42028616137949e-17
Shisa5	0.688202	5.14123705244219e-17
Vegfd	2.04468	5.42100340024986e-17
2810429I04Rik	-1.45395	5.45301634227886e-17
Fam210b	-1.00602	5.649217444992e-17
Sox8	-2.90347	6.06452826614143e-17
Qk	-0.358294	6.0652511758162e-17
Vps37b	-0.678028	6.25970002440321e-17
Ppm1h	-0.761087	6.79601775677614e-17
Znrf2	-0.575506	8.40513961562627e-17
Rcor2	-0.879686	8.44355026712029e-17
Smg7	-0.451699	9.01585304794308e-17
Lmx1b	1.97251	9.2559784251617e-17
Dennd1b	-0.468276	9.27422583881489e-17
Olfml2b	1.28574	1.02165073764765e-16
Tsc22d1	-0.403738	1.11347900898796e-16
Sept7	0.285754	1.16597205111014e-16
Tlk1	-0.494623	1.19441291711285e-16
Nfkbiz	-0.811819	1.28222882181931e-16
St7	0.457267	1.37419721197019e-16
Chsy3	-0.456037	1.46482066536051e-16
Rgl1	0.543225	1.4870382143991e-16
Chodl	1.1765	1.52375733533987e-16
Pdia3	0.44163	1.53209438502903e-16
Gm17749	1.3919	1.5385591874268e-16
Ldlrad3	-0.468629	1.63516410825505e-16
Ptgs2os	1.70353	1.67817998484483e-16
Fbln2	0.569152	1.69273510967854e-16
Plac1	1.55077	1.82805717057104e-16
Foxf2	-2.1558	2.04950750526874e-16
Tspan7	-0.854053	2.14119739527701e-16
1810034E14Rik	-0.794173	2.21409425204162e-16
Crtap	0.725836	2.21685754840732e-16
Birc3	0.667837	2.36116069697507e-16
Pitx2	-1.39892	2.43968120339675e-16
Zcchc3	-0.49331	2.44819887902665e-16
Tmed3	0.777246	2.49652716741185e-16
Gpr88	3.13663	2.49732263692178e-16
Hand2os1	-1.11291	2.50158109395579e-16
Gsta4	-0.61751	2.60854172143836e-16
Marveld1	0.556035	2.77098985420181e-16
Gm49678	2.36916	2.80205097477645e-16
Tax1bp3	0.493664	3.0908010004156e-16
Dnajc15	0.503236	3.33588234980967e-16
Gm26936	-0.787478	3.52382303207857e-16
Numbl	0.564896	3.52382303207857e-16
Gpx3	1.17472	3.72238337887451e-16
Plpp5	0.73498	4.00971679515315e-16
Gm35330	2.83852	4.59129719926911e-16
Ergic3	0.415064	5.34989091093346e-16
Mir17hg	-1.25472	5.65745772160259e-16
Bex2	-0.851343	5.72360876902088e-16
Kpna4	-0.510221	6.27127230106074e-16
Rims1	-0.534618	6.3395639087398e-16
Lrpap1	0.478418	6.51518009080211e-16
Gm26771	0.897673	6.74962276762629e-16
Pld5	1.17688	7.05570510731373e-16
Smox	-0.687839	7.05570510731373e-16
Zfp804b	1.5633	7.51802345732346e-16
Bmp3	-0.95114	7.55832553928181e-16
Gm32442	1.71805	8.27705829824263e-16
C630043F03Rik	-0.991904	9.37577259662451e-16
Nab2	-0.761154	9.8535908656755e-16
Slc38a4	0.658683	1.01081731299487e-15
Ankrd44	-0.641171	1.05390701657832e-15
Mmp14	0.471274	1.1036590688481e-15
Dach1	-1.09457	1.18886064887862e-15
Il13ra1	-0.971789	1.24608775578423e-15
Spon2	1.32592	1.36137604530617e-15
Emb	-1.6024	1.38305710771652e-15
Eva1a	-0.955369	1.38534593899145e-15
Cltc	0.282495	1.46037430316493e-15
Arl1	0.413532	1.50365730954631e-15
Ust	0.51204	1.52120307788789e-15
Pik3r3	-0.60223	1.54724599871503e-15
Ostf1	0.636679	1.57094830017111e-15
Sinhcaf	-0.932532	1.57430653092355e-15
Itga3	-1.75649	1.59416579651589e-15
Mageb18	2.75674	1.59814375756347e-15
Unc13b	1.01418	1.79067795492353e-15
Six2	-1.44273	1.82707956762048e-15
Bmp2	-1.31833	1.86787611229741e-15
Rasa3	-0.82367	1.8680295299119e-15
Plekha3	-0.526411	1.95646453800923e-15
Txndc17	0.555387	2.04463931405506e-15
Clcf1	-1.23289	2.05070207902434e-15
Slc38a1	-0.590106	2.08988176719146e-15
2700069I18Rik	1.07487	2.2999529949798e-15
Swap70	-0.70809	2.4257210989834e-15
BC006965	-1.45134	2.4257210989834e-15
Trmt9b	-1.28877	2.44854896504236e-15
Fbxw7	-0.514146	2.55145047199226e-15
Gadd45b	0.683589	2.63318246039131e-15
Fam57a	0.910906	2.66121485838007e-15
Col4a1	0.512927	2.80922168420035e-15
Dipk2a	-0.803686	3.08571807132877e-15
Cdkl5	-0.684102	3.47062119409905e-15
Cldn11	-1.55148	3.53905300009144e-15
Vgll4	-0.452405	3.57335042697986e-15
Myorg	1.50409	3.7373407444077e-15
Crabp1	1.19354	3.8282094570887e-15
Prelid1	0.4829	4.02458990870964e-15
Elovl1	0.822007	4.07089413769752e-15
Hipk2	-0.496409	4.40935635678381e-15
Rabac1	0.589889	4.87918863438846e-15
Khdc4	-0.328375	4.99938714936284e-15
Adamts12	0.930177	6.08068195979675e-15
Fads3	0.9181	6.85117365157618e-15
1700012D14Rik	0.68662	6.98054427332459e-15
Syt11	-0.828355	7.28527330007424e-15
Alx3	-1.21214	7.34584671494845e-15
Syn3	-0.53049	7.56878586229397e-15
Eya4	-0.738388	8.1931409260534e-15
Hist1h2bc	-1.09173	8.54557466192209e-15
Gm49003	0.787154	8.577150003743e-15
Pmepa1	0.447584	8.60331404717946e-15
Dach2	-0.912824	8.90438924085411e-15
Nol10	-0.644003	9.20666617985476e-15
Spata5	-0.424376	9.33908374607852e-15
Tprgl	0.482642	9.33908374607852e-15
Pcdh10	0.687596	9.41716601737205e-15
Rflna	-0.822094	9.55120829642884e-15
Cdo1	0.893098	9.55120829642884e-15
Sap30	-0.962071	9.66622775472973e-15
Asap1	-0.4304	9.87688967615386e-15
Kcne4	1.74926	1.00825749971074e-14
Gm34517	-1.41119	1.01866246056424e-14
Gm4258	-0.572828	1.03010143753681e-14
Casp12	2.4033	1.05387386312212e-14
Tmem108	0.866273	1.23239245916738e-14
Tfap2c	-1.91538	1.23281467187748e-14
Arpc1a	0.509139	1.27063189466295e-14
Tra2b	-0.46023	1.4702274652965e-14
Sv2b	1.90005	1.47807402912891e-14
Anxa5	0.673334	1.51462647202686e-14
Fxyd6	0.564826	1.55398544530833e-14
Pim1	-0.828396	1.59458635295951e-14
Tcn2	0.67643	1.61187489151802e-14
Fzd8	-0.874949	1.65618159264614e-14
Sdc4	-0.633864	1.69470477528583e-14
Slc22a1	1.15995	1.85156246529591e-14
Adgre5	0.803562	1.85458109793261e-14
Kif26b	-1.12857	1.88501480339243e-14
S100a13	1.01467	1.91426487749834e-14
Ccl11	2.17143	1.9216732074725e-14
Hpse2	-1.12414	1.97870287664311e-14
Nenf	0.566107	1.97870287664311e-14
Znrf3	-0.504024	1.97901464975154e-14
Rpn2	0.440871	2.02322033074061e-14
Fer	0.395226	2.08967517324444e-14
Ctsz	0.577556	2.12513979224183e-14
Rap2a	0.564836	2.13439034667799e-14
Bcas3	-0.370163	2.19474393418181e-14
Adamts20	0.763936	2.25410521870074e-14
Mgat2	0.550562	2.37339227220882e-14
Acvr2a	-0.457728	2.39137002663529e-14
Azin1	-0.442705	2.63066572364008e-14
Acat1	0.427574	2.63423652866192e-14
Arhgap20	1.14689	2.67866186218193e-14
Igsf10	0.710316	3.08746345992383e-14
Pogz	-0.42361	3.09189363161979e-14
Snhg4	-0.754187	3.10323965486857e-14
Lamp1	0.496847	3.16397805368291e-14
Cntn4	-1.58369	3.21777951529349e-14
Tenm3	0.534088	3.33177365889876e-14
Medag	1.7543	3.33738467378207e-14
Gm13889	-1.324	3.62276189858642e-14
Nans	0.610306	3.64757223418693e-14
Yes1	-0.386482	3.67992659787859e-14
Wdr17	-1.93602	3.70471293397406e-14
Gsn	0.53035	3.90397634901876e-14
Inip	-0.78742	4.26282684181352e-14
Atad2b	-0.392514	4.30993977884369e-14
Rcc2	-0.711224	5.34124387130019e-14
Slc25a4	0.362489	5.45852099065051e-14
Pdlim3	-1.62833	5.50394488247699e-14
Abr	-0.562463	5.84423071441222e-14
Gypc	0.60786	6.07709133273263e-14
1110032F04Rik	2.19496	6.08475365169249e-14
Sfmbt1	-0.447194	6.08686452720703e-14
Rtl4	-1.33726	6.09011908780248e-14
Foxc1	-1.00267	6.41768272324662e-14
Prdx4	0.546476	6.47466633697487e-14
Tceal6	-1.99528	6.75249742638384e-14
Tox3	-0.671146	6.92650061469562e-14
4933424G05Rik	-0.999067	6.96208526477194e-14
Slc7a8	1.13917	7.00069412505469e-14
Pcnx	-0.565467	7.53190634207657e-14
Cytl1	-3.61673	7.54663072794923e-14
Nlk	-0.388682	7.68761343538057e-14
Chpf	0.634469	7.69365390393969e-14
Lman1	0.392343	7.86982662135451e-14
Hs3st1	1.12534	7.92076503656385e-14
Sox11	-0.771591	7.93520594718842e-14
Nfatc1	0.550935	8.27173557858838e-14
Sirt1	-0.510556	8.38023417021235e-14
Man2a1	0.991727	8.56873389127158e-14
Prrt4	1.77872	8.66149724307545e-14
B4galnt4	-0.790702	8.70432384230509e-14
Ly86	2.15005	9.31838243240474e-14
Pgm3	0.392625	9.36466399384967e-14
Rbms3	0.546839	9.44867159045999e-14
Khdrbs2	-0.950121	9.61973655084315e-14
Zfp36	-1.15593	9.90366125589782e-14
Hand1	-2.96668	1.00976930206623e-13
Baz1a	-0.616963	1.04400570283609e-13
Ren1	3.62488	1.05409041720292e-13
Bmp6	-1.03539	1.11990855909255e-13
Pcolce2	-1.50955	1.13704395982621e-13
Trib2	-1.04065	1.2089880394051e-13
Zc3h6	0.709111	1.34036453926709e-13
4930402H24Rik	0.538042	1.36826035753192e-13
Ap1s3	-0.794371	1.4400721651234e-13
Ifi27	1.06795	1.47670968722236e-13
Cdkn2aip	-0.746119	1.52376710345185e-13
Adamts5	0.985702	1.61247169242725e-13
Sptbn1	0.546386	1.76892911334696e-13
Ass1	2.02347	1.86960997762959e-13
Ang	1.24571	1.95090739497802e-13
Foxo1	-0.69109	1.9864709832632e-13
Ptbp2	-0.381799	2.09532295107345e-13
Pgm5	0.890071	2.11103769849052e-13
Wasf1	-0.790724	2.16436260326031e-13
Fez1	0.452262	2.2094651589157e-13
Ppib	0.502657	2.32912609276016e-13
Nsdhl	0.901425	2.36489509641771e-13
Slc8a1	-0.704918	2.4754508502124e-13
C9	1.22528	2.49152849678086e-13
Pth1r	0.547007	2.50356580890256e-13
Unc5c	-0.91641	2.52162505656161e-13
Ddost	0.623501	2.93082044593894e-13
Pde9a	-0.708023	3.05739765939498e-13
Anpep	1.07009	3.37714202732535e-13
Iqsec2	0.63405	3.40140269013951e-13
Gli1	-1.17938	3.44461558522276e-13
Gm48957	1.3026	3.47085008008346e-13
Xrcc4	-0.487187	3.62913282361638e-13
Sumf2	0.41505	3.70805525254214e-13
Aga	0.716571	4.02550102112273e-13
Fstl1	0.333819	4.0735279198185e-13
Tmem132cos	1.01157	4.09011630989222e-13
Arih2	-0.376426	4.13005400104465e-13
Nme2	0.51594	4.23278786716063e-13
Mfap4	0.56145	4.3513516119561e-13
Krit1	-0.430686	4.55049062768924e-13
Zbtb11	-0.375301	4.80385938940583e-13
Plekha5	-0.356188	4.94055872149935e-13
Dpyd	-0.730999	5.05806607492324e-13
Sp5	1.74672	5.46714261965871e-13
Ttc23l	0.905283	5.53609739782443e-13
Lrp1	0.429074	5.55531278891782e-13
Calb1	1.66845	5.55810403419977e-13
Nrp1	0.983884	5.90066847391116e-13
Erlin2	0.645122	5.96020019401922e-13
Spaca1	1.23293	5.96669491573957e-13
Trpv4	-1.5927	5.98561818270893e-13
Irx2	1.02811	5.99280225768949e-13
S100a6	1.34314	6.05470639059945e-13
3110056K07Rik	-0.513096	6.17361518957111e-13
A730056A06Rik	1.02216	6.37443816856228e-13
Eif4ebp1	0.852386	6.46638161242985e-13
Krcc1	0.572146	6.53062220459131e-13
Tmprss7	1.06342	6.53062220459131e-13
9330175M20Rik	1.55211	6.61224809281489e-13
Cobll1	-0.885144	6.693676870067e-13
Pi4k2b	-0.40522	6.73181984024154e-13
Cpsf6	-0.382644	6.78141730928106e-13
Tril	0.927184	7.08040060040304e-13
4930523C07Rik	1.00412	7.36552196977816e-13
Ctsa	0.480926	7.5215826528067e-13
Gm13684	-0.743073	7.57969243263586e-13
Luzp1	-0.372063	7.61033134377037e-13
Irx5	0.780233	7.72364273953411e-13
Ifi27l2a	2.42453	7.86531657251527e-13
Hist3h2a	-0.94862	8.36521438771057e-13
Oaf	0.4419	8.41381451224688e-13
Mpv17l2	0.912253	9.03149253822474e-13
Car3	-2.93918	9.26206997247459e-13
Tmsb4x	0.682609	9.3260969502909e-13
Cacnb2	-0.544174	9.56495901800484e-13
Gm26827	-0.767281	9.62371330464204e-13
Rfx7	-0.356453	9.95105140865664e-13
Spink13	1.74763	1.01783254937297e-12
Mbd2	-0.398872	1.04238901205519e-12
Sorcs1	-1.14985	1.0975698686638e-12
Ints6l	-0.708686	1.10506623959791e-12
Olfml2a	0.767524	1.14615512325275e-12
Lrrc8b	-0.705017	1.16771363168379e-12
Gabarap	0.544104	1.16790611897954e-12
Tmem132e	1.92106	1.17500425316819e-12
Abhd5	0.583958	1.17833539627979e-12
Ftl1	0.468716	1.18831466191191e-12
Slc9a1	0.56279	1.23885178433108e-12
Bcl11a	-0.922629	1.24566876318694e-12
Col4a2	0.445094	1.28701539190744e-12
St3gal6	-0.878907	1.29447584847391e-12
Dlc1	0.602358	1.29881995605055e-12
Tfdp2	-0.434218	1.31874905355641e-12
Os9	0.427895	1.34124883175719e-12
Slc25a13	-0.484242	1.38363435304416e-12
Plekhg1	0.371297	1.46497432854788e-12
Selenon	0.460835	1.48041316428129e-12
Myl9	0.861139	1.6411958158483e-12
Phtf2	-0.623325	1.64708853719645e-12
Gm28320	1.95498	1.66315261347661e-12
Ccbe1	1.25805	1.66364292243083e-12
Loxl2	0.584712	1.68924625457638e-12
Rras	0.706949	1.70675237767947e-12
Fjx1	0.58712	1.77430134789836e-12
Qtrt2	-0.579855	1.8034998626118e-12
Tubb2a	0.96557	1.88168968787929e-12
Gm26691	0.577893	1.908881629854e-12
Stx8	0.508864	1.9456962079697e-12
1600010M07Rik	-0.559114	1.9456962079697e-12
Tfap2b	-1.31874	1.9562525761337e-12
Ramp3	1.47462	1.96144080885193e-12
Mmp11	0.6726	1.99785982841276e-12
Cntn6	-2.41592	1.99785982841276e-12
Cbln2	1.07846	2.06636808325258e-12
Gm6994	0.777898	2.1581794337515e-12
Vapb	0.400176	2.17840358680903e-12
Trhr	2.68707	2.25476602490353e-12
Ube2cbp	-0.951979	2.29135779385179e-12
2310022B05Rik	0.472277	2.3161159801911e-12
Jph1	-0.905393	2.36195825159982e-12
8030462N17Rik	-0.490826	2.36195825159982e-12
Smpd3	-1.55817	2.36994525711615e-12
Entpd3	-1.58708	2.42929556745189e-12
Specc1	-0.417944	2.46423122270284e-12
Ctnnd1	-0.374139	2.47800045707432e-12
Mdga1	0.630808	2.49636855314643e-12
Xdh	2.44948	2.61115114317624e-12
Frem2	-1.38367	2.64938171587464e-12
Svbp	0.543376	2.66484475943729e-12
Fmo4	2.23344	2.72516747152603e-12
Tent5a	0.48843	2.77742950884212e-12
Pdia6	0.578548	2.81697270191111e-12
Copg1	0.347402	2.9609767794912e-12
Cntfr	0.685211	3.02571435240232e-12
Aim2	-1.5099	3.09660425524579e-12
Pmm1	0.671501	3.10618535286028e-12
Fam199x	-0.614151	3.1418902641638e-12
Hebp2	0.82774	3.1418902641638e-12
A730090N16Rik	0.781996	3.15082701744845e-12
Gpx8	0.576882	3.16814768964607e-12
Matn1	-2.82344	3.29751190309742e-12
Gm34184	2.28437	3.39408535347863e-12
Gm15886	-1.06506	3.55203793181999e-12
Stim2	-0.410053	3.5879123584268e-12
Cnksr2	-0.885181	3.74515780404814e-12
Dsel	0.483322	3.74515780404814e-12
Fbln1	0.581768	3.7770612290201e-12
Mboat2	-0.65343	4.0310279548086e-12
Efna5	0.603609	4.22715503948771e-12
Igdcc4	0.496682	4.24139070945001e-12
Tmbim6	0.297337	4.28165756090221e-12
Tmem119	0.591018	4.31202878335708e-12
Cep126	-0.745861	4.36675577092246e-12
Ndrg2	-0.972965	4.73353228500952e-12
Arl15	-0.532195	4.79041287689404e-12
Terf1	-0.414357	4.86350861968048e-12
Tiam1	-0.660149	4.88257721033548e-12
Tspan13	-0.752566	4.93079113366714e-12
Sema4d	-0.690523	4.95809274282249e-12
Fras1	-0.669359	5.00348722264022e-12
Rab8b	-0.402984	5.06963169477097e-12
Metrnl	0.776648	5.17661605103621e-12
Lncbate1	0.932037	5.37298435121772e-12
Hoxd8	3.42319	5.41301766009961e-12
Olfr959	2.8672	5.65599676981404e-12
Lrrc15	1.56891	5.69390066789285e-12
Wapl	-0.309118	5.69947555392277e-12
Grin3a	-0.855731	5.81476512305618e-12
Efhc1	0.741591	5.85679131654301e-12
Jcad	0.843979	6.16177893879789e-12
Atp11c	-0.431198	6.17859003425338e-12
Ddb1	0.355407	6.33320146738355e-12
Gm32531	1.81549	6.4119820106187e-12
Fubp1	-0.307472	6.52986329337134e-12
Zbtb12	-0.565333	6.57093551573182e-12
Cacnb4	-0.631099	6.58891822890179e-12
Osbpl6	-0.397783	6.87861922875966e-12
Ip6k2	-0.399358	7.0205668820806e-12
Tubb6	1.02125	7.06803323761266e-12
Tnfsf12	0.721514	7.38481051622519e-12
Cdc40	-0.363651	7.43165779195579e-12
Gdf5	-2.39336	7.60464808643041e-12
Cmc2	0.509541	7.72625951027972e-12
Gm28376	-1.1606	7.73496666633917e-12
Zbtb20	-0.68888	7.91818209898104e-12
Rcl1	-0.527885	7.93950332359894e-12
Plb1	1.59594	8.031101270684e-12
Bgn	0.689116	8.45409151991876e-12
Ppm1d	-0.494979	8.56206460285061e-12
Corin	0.8712	8.58452022617343e-12
Prokr1	1.51423	8.76787662493156e-12
Zic4	2.1514	8.8360235303679e-12
Basp1	0.758678	9.22285267168007e-12
Etv1	-0.745137	9.22350715364881e-12
Ythdc1	-0.31314	9.29873409778609e-12
Cxxc4	0.807839	9.31557740021703e-12
Scd1	0.798972	9.70872838424458e-12
Erich2	1.20966	9.83664948572653e-12
Nlgn3	-0.668375	9.88118559791574e-12
Igfbp2	0.935382	9.9883922550955e-12
Dap	0.394954	1.04622202275619e-11
Foxd2	-1.86884	1.05987413910969e-11
Lrp12	-0.612052	1.06349356976987e-11
Pmp22	0.795375	1.06565632063542e-11
Ddx25	0.718918	1.06960647235457e-11
Gm40999	1.41184	1.08342802571774e-11
2310014F06Rik	0.689702	1.13413845883794e-11
Gm45716	-0.942147	1.14779583276998e-11
Ccdc82	0.644414	1.1514732353097e-11
Dram2	0.480531	1.20411920880883e-11
Copz2	0.746683	1.20813410994949e-11
Col2a1	-0.817267	1.2168911411694e-11
Nfam1	1.78497	1.22345603854601e-11
Ddr2	0.43634	1.25959354547953e-11
Plxnb2	0.481261	1.27488338001513e-11
March2	0.455852	1.28001740195178e-11
Emilin1	0.404685	1.28742416232065e-11
Lrrc7	0.500244	1.29290859292242e-11
Capn1	0.880064	1.31720431774558e-11
Pttg1ip	0.394563	1.32729184808724e-11
Hipk1	-0.562037	1.32918803949131e-11
Pkp4	-0.780512	1.33594940582784e-11
Hcfc1r1	0.524511	1.33824663690308e-11
Ankrd27	0.519742	1.4546144606051e-11
1500004A13Rik	-0.504147	1.52603956266522e-11
Ifitm2	0.64597	1.54208425387848e-11
Pax7	-3.18899	1.55747813622509e-11
Gm37229	-1.11894	1.56360985691642e-11
Hacd4	0.757004	1.56784710785602e-11
Tmem173	1.3768	1.56784710785602e-11
Cask	0.316341	1.56784710785602e-11
Ifi30	0.7897	1.57610409683525e-11
Emilin2	0.793481	1.57630692735761e-11
Rsbn1	-0.383707	1.60491828420904e-11
Cspp1	-0.318028	1.62832331695116e-11
Gas1	0.617011	1.65127079742107e-11
Irf2	-0.404231	1.67954128718477e-11
Vps29	0.489961	1.69508156698204e-11
Csad	-0.435449	1.71443599310942e-11
Pspc1	-0.322293	1.80028699951809e-11
E330013P04Rik	0.889535	1.82372240703688e-11
Tbc1d1	-0.472105	1.8326672066942e-11
Plxdc2	0.443829	1.84214281432361e-11
Slc12a7	-0.754607	1.89517336916352e-11
Cdyl2	-0.497568	1.91981853263101e-11
Mest	0.648736	1.99254143706727e-11
Fndc3b	0.356101	2.02943462150482e-11
Trib1	-1.46807	2.08348290608626e-11
Erp29	0.392047	2.08635890076512e-11
Gm48226	-0.783663	2.16226703459474e-11
Car14	-1.30862	2.17125759917988e-11
Dlx5	-1.18616	2.22239713919403e-11
Sgce	0.377455	2.22733114905257e-11
Ankrd13c	-0.356888	2.36109255393773e-11
Kif16b	-0.526935	2.37621513504965e-11
Nrk	1.02624	2.43215715387164e-11
Loxl1	0.984516	2.45012857549691e-11
2610316D01Rik	0.736275	2.47654940719201e-11
Myl12a	0.449823	2.51812400097546e-11
Bzw2	-0.343989	2.5205587021861e-11
Adamtsl3	-0.708403	2.55273824137969e-11
Foxq1	-2.28591	2.619512372291e-11
C1qtnf7	0.831009	2.67961804012126e-11
Gm35024	2.56634	2.71761933948748e-11
Tmem246	0.572789	2.8185693156171e-11
Tbc1d9	-0.972421	2.81912572820094e-11
Entpd1	-1.412	3.02282728433328e-11
Dag1	0.3867	3.03204253310526e-11
Tgif1	-0.729611	3.06371986201241e-11
Gm30075	2.9055	3.06371986201241e-11
4732440D04Rik	0.645423	3.07678800883278e-11
Pygb	0.626879	3.07961410193167e-11
Wee1	-0.466185	3.07961410193167e-11
Nucb1	0.359203	3.10020544476336e-11
F3	-1.03513	3.43303776264357e-11
Olfr921	2.04094	3.45070854371154e-11
Pnisr	-0.316204	3.47797324410349e-11
Cnot6l	-0.383167	3.49116310930783e-11
Neto2	-0.641303	3.50964696280373e-11
Mgst1	0.676823	3.51011947609565e-11
Rif1	-0.550187	3.59010485221981e-11
Numb	-0.327187	3.67682341905883e-11
Erbb4	0.981631	3.92131354629673e-11
Cd44	0.749846	3.97823491416198e-11
Dusp16	-0.497012	4.05691797127346e-11
Slc38a2	-0.346603	4.22076188370503e-11
Kcnmb2	-1.34604	4.30711120923006e-11
Gm30524	2.15801	4.3899170229403e-11
Col8a2	0.825626	4.4088735333753e-11
Ikbip	0.402698	4.4591873893569e-11
Lrrtm1	1.15726	4.52551041264403e-11
Igf1	0.570187	4.64928827975258e-11
Ccdc117	-0.476422	4.72579356981661e-11
Chst14	0.645152	4.88025416146305e-11
Msh3	-0.542359	5.4141016569954e-11
Rnf138	-0.373241	5.43699663306488e-11
Zfp24	-0.510173	5.66839562681254e-11
Taf3	-0.412289	6.01424711994725e-11
Snx4	0.282912	6.03741043588575e-11
Atp1b1	1.18121	6.44833713267816e-11
C1galt1	-0.592296	6.54328984713887e-11
Sema5b	0.801136	6.64387527773415e-11
Dnm3	0.578595	6.67850223557101e-11
Calu	0.335556	6.75768357884344e-11
Fbxo33	-0.500021	6.83454152210279e-11
Cep85l	0.606709	6.84279077188757e-11
Ppic	0.656066	6.85912891664926e-11
Zim1	0.617305	6.9407600045564e-11
Lamtor2	0.407145	7.24520095575150e-11
Khdrbs3	-0.602948	7.4550637454556e-11
Lmo4	-0.565002	7.4550637454556e-11
Pfkfb3	-0.82296	7.46549711220484e-11
Btbd11	-0.60028	7.50716020630722e-11
Sin3b	0.410369	7.85164200607717e-11
Lingo1	0.786811	7.97015502014539e-11
Cerk	-0.625669	8.43641335159019e-11
Adam15	0.751111	8.45822220200123e-11
Gprc5b	-0.982624	8.47093217878956e-11
Nupr1	1.18633	8.53962777968348e-11
Spire1	-0.491021	8.67794491108809e-11
Smco4	0.546173	8.70620271838542e-11
Cdc37l1	-0.369096	8.82753089754674e-11
Emp1	0.883347	8.98477507067921e-11
Flvcr1	-0.524503	9.40815003239727e-11
AI606473	-2.29407	9.58150072704905e-11
Rer1	0.444674	9.63149224800922e-11
Clec1a	2.74506	9.69373979466816e-11
Cep97	-0.608103	9.7968536824673e-11
Carhsp1	0.478085	9.82409909066494e-11
Cadm4	-0.799915	9.95227759944353e-11
Dusp14	0.630802	1.05414388749637e-10
Mir100hg	0.688173	1.0597083415892e-10
Dmd	0.75119	1.10440714422667e-10
Syt9	-1.11884	1.10735673886749e-10
Twf1	0.418039	1.11043440555337e-10
Anapc11	0.383797	1.11237932658776e-10
Grik4	-0.62914	1.13130668570289e-10
Piwil2	0.783917	1.13951599705752e-10
Daam1	-0.539287	1.14754958779305e-10
Iqcb1	-0.310494	1.16547261133037e-10
Prdx5	0.489095	1.16960230348674e-10
Dab2	0.492797	1.1955655690313e-10
Ier5l	-0.807523	1.22951133235637e-10
Lax1	0.848381	1.23701524910166e-10
Sytl5	-0.934366	1.23769046473087e-10
Pld3	0.468983	1.29398486085772e-10
Rnf227	-0.626187	1.30467209428357e-10
Cat	0.478696	1.38015262386169e-10
Yaf2	-0.341746	1.3911429142613e-10
Gmds	-0.506825	1.40354788122104e-10
Meox2	0.886598	1.40641355782835e-10
Ipo7	-0.324346	1.46757973929752e-10
Fgfr3	-1.00131	1.49311166212556e-10
Map3k3	-0.372971	1.54232576878643e-10
Pde3b	-0.571927	1.56607019732997e-10
Pld1	1.06654	1.57234997047006e-10
Rundc3b	-0.62869	1.59325106704835e-10
Afap1	0.397733	1.64065161920733e-10
Lrrc59	0.368484	1.65291505557973e-10
Gas2l1	0.646838	1.6540219090165e-10
Lasp1	0.427478	1.66537278699855e-10
Irs1	-0.368443	1.68384675634283e-10
Kcnq1ot1	0.62381	1.70518661778126e-10
Gap43	0.694982	1.70518661778126e-10
Ddx21	-0.449794	1.71760965959102e-10
Kit	-0.943372	1.76701318588743e-10
Ggta1	1.26724	1.78870725463595e-10
Tmsb10	1.00628	1.82017544556887e-10
Dkk2	0.846828	1.82179565440156e-10
Gata3	-2.39438	1.88877371604259e-10
Fkbp1a	0.522738	1.88877371604259e-10
Syt13	1.735	1.9921451213943e-10
Cyb5r3	0.428041	2.00766535075782e-10
Foxo3	-0.521758	2.01344397723238e-10
Errfi1	-1.28761	2.02210518092055e-10
Atrnl1	0.400346	2.1411355882841e-10
Rsf1os1	-0.528699	2.1411355882841e-10
A230057D06Rik	0.343125	2.20678647342859e-10
Prune2	-1.22142	2.21592164835285e-10
Klf13	-0.561766	2.28055823691849e-10
Mindy3	-0.477817	2.37948340194343e-10
Gtf2a1l	1.04966	2.45650736364431e-10
Zfp365	-1.19104	2.47571586788728e-10
Lpin2	-0.420242	2.49988537313841e-10
Anks1	-0.516289	2.53906731975406e-10
Trp53bp2	-0.429244	2.54739086537209e-10
Mtx2	0.425902	2.55336296576507e-10
Samd8	-0.418915	2.60049492404419e-10
Gm11077	1.57194	2.62624723839315e-10
1700019D03Rik	0.939214	2.6506193762325e-10
Cadm1	-0.936445	2.6669383382607e-10
Tob2	-0.502102	2.67721169401986e-10
Mydgf	0.458381	2.83350686858957e-10
Alk	1.25086	2.98063805083299e-10
Gm15563	-0.664218	2.99474635003487e-10
Morrbid	1.3053	3.05318492252422e-10
Fat1	-0.459043	3.10978922311577e-10
Rere	-0.26761	3.11775924908216e-10
Camta1	-0.313271	3.30932549755581e-10
Ppp1r15a	-0.697677	3.38381681553087e-10
Fgfr1	-0.372205	3.39158926144363e-10
G630064G18Rik	2.25267	3.4470864946956e-10
AC142100.1	0.709674	3.46425013065362e-10
Pdxp	-0.911584	3.49267145510359e-10
Usp28	-0.497628	3.49439294443593e-10
Rassf8	0.800276	3.55776273661552e-10
Htr2a	0.96246	3.63409389327202e-10
Sybu	0.927359	3.64677064491846e-10
Mfap2	0.516501	3.71682809998321e-10
Gm41335	-1.9294	3.87335516582145e-10
Gm29325	2.41588	3.88585841640332e-10
Lonrf1	-0.699007	3.94589500044632e-10
C530008M17Rik	-0.497634	4.00943273893085e-10
Mdn1	-0.494375	4.08275830199831e-10
Laptm4a	0.563089	4.08285652767763e-10
Morn1	0.50572	4.32678356490134e-10
Fgfbp3	-0.76853	4.32678356490134e-10
Galk1	0.423617	4.38105815879428e-10
Cavin1	0.783758	4.52538327463082e-10
Prkar2b	-0.523361	4.71391145971028e-10
Rbm10	-0.439211	4.86312609739725e-10
Ssc5d	1.25592	5.13827196604394e-10
Trpm3	-0.982947	5.24004397830101e-10
Cenpb	0.598212	5.30083125602566e-10
Nfix	0.54242	5.30083125602566e-10
Hist1h1c	-0.810467	5.45726589037484e-10
Pofut2	0.497855	5.4789217574321e-10
Tanc2	0.349611	5.54196438001234e-10
0610012G03Rik	0.384376	5.64138363194147e-10
5330438D12Rik	-0.365594	5.6582776835244e-10
Bend3	-0.774981	5.66266275326222e-10
Chd1	-0.446755	5.82405431328404e-10
Siah2	-0.729222	5.91408692602345e-10
Ppm1l	-0.479577	5.99312711730351e-10
Nxpe3	-1.01612	6.03187541621279e-10
Jup	0.558142	6.08510064708321e-10
Sgcd	0.464767	6.26739631410592e-10
Mpp2	-0.579302	6.59133190591245e-10
Phf24	0.865381	6.6509047509982e-10
Prss35	0.923465	6.72064060550026e-10
Srgap1	0.39141	6.74334529309214e-10
Ing3	-0.442185	6.77341440994147e-10
3222401L13Rik	1.0446	6.8712742908132e-10
Ptpn3	-0.510248	6.92399861682575e-10
Ap1ar	-0.397646	7.01002174327097e-10
Proser1	-0.541948	7.09730626499832e-10
Sms	-0.632987	7.09730626499832e-10
Gpm6a	-1.47008	7.09730626499832e-10
Dnpep	0.530322	7.1507880950385e-10
1700001K23Rik	1.24792	7.2018963143867e-10
St3gal2	0.466536	7.2236423384541e-10
Maoa	0.481593	7.35560026088141e-10
Kctd10	0.468973	7.36468292195667e-10
Actg2	1.71644	7.37442062358455e-10
Glt8d1	0.351449	7.38201862337968e-10
Suz12	-0.277059	7.43206569237415e-10
Cercam	0.75636	7.43686423313107e-10
Top1	-0.31646	7.50044966083137e-10
Slc16a12	1.40764	7.74718719810014e-10
Mpzl2	-1.33249	7.82606829369233e-10
Slc39a7	0.370238	7.82844372848553e-10
Pcsk9	1.43717	7.82844372848553e-10
Cntnap5b	0.962956	7.88025319205479e-10
Seh1l	-0.374516	7.93115205397408e-10
Cep57	-0.369278	8.18943819219228e-10
Vps35	0.312582	8.27488120125288e-10
Plscr3	0.44226	8.32508992390819e-10
Gldn	-2.26577	8.3504912077366e-10
Smchd1	-0.307089	8.38597906585242e-10
Fbln5	0.551018	8.38597906585242e-10
Klf3	0.462769	8.73061595112244e-10
Tmem106a	0.669257	8.8338989408696e-10
Txndc8	1.56735	9.03724469941204e-10
Tgfbr1	-0.520748	9.24112274141466e-10
Pdpn	0.93171	9.245460071625e-10
Dpep1	1.28503	9.44985304303626e-10
Tnfsf11	-2.76253	9.55633062275229e-10
Gmppb	0.773466	9.64171673985627e-10
Nipal2	0.521163	9.67913957171678e-10
Tmem243	-0.420619	9.71645546715218e-10
Mtfr1	-0.489365	9.82248828735672e-10
Impa2	-0.638828	1.0392155855098e-09
Alg5	0.542168	1.04811265055928e-09
Rb1	-0.443419	1.04811265055928e-09
Cntn1	-1.28401	1.05487920971141e-09
Hnrnpll	-0.329253	1.06316336672908e-09
Zbtb10	-0.484074	1.08178422195866e-09
Adamtsl5	1.79662	1.09622878184722e-09
Abl2	-0.368829	1.12356824398544e-09
B3galnt1	0.57526	1.15332222452557e-09
Nbas	0.351612	1.15507712829348e-09
Gm48740	1.11937	1.18205645340446e-09
Slc12a2	-0.432437	1.19782211905801e-09
Fam13c	-1.04421	1.20700718929818e-09
Hectd2	-0.489893	1.20700718929818e-09
C9orf72	-0.63209	1.20861493972576e-09
Gm15675	2.14164	1.23151377775311e-09
Zcchc2	-0.567232	1.23440220168056e-09
Ralb	0.41851	1.23578047421006e-09
Pde4b	-0.502088	1.24277536340915e-09
Lama2	0.735491	1.2608874834484e-09
Tapt1	-0.422506	1.27083148499806e-09
Cd63	0.738341	1.27414012112172e-09
Car13	-0.963321	1.27479834434531e-09
Map4k4	-0.265175	1.27534284855433e-09
Tle5	0.351992	1.30100538971191e-09
Dcaf1	-0.323662	1.3070419042626e-09
Crispld2	0.756456	1.32074796815289e-09
Ube2e1	-0.36719	1.3533509193745e-09
A830019P07Rik	2.76576	1.36858172145058e-09
Msx1	-1.81515	1.38342607671063e-09
Chordc1	-0.339051	1.39240994333783e-09
Pigk	0.450621	1.39872892985715e-09
Btg1	-0.427879	1.39872892985715e-09
Gm40841	0.758627	1.40698176585781e-09
Dpp3	0.472771	1.43782418760988e-09
Sigmar1	0.434009	1.43904278034683e-09
Gpc3	0.515201	1.47058297750907e-09
Abcg1	-1.14263	1.47671031473368e-09
Zswim6	-0.355358	1.48212353458289e-09
Gm16070	-0.676655	1.48298657003172e-09
6720427I07Rik	-0.365348	1.49241943074185e-09
Ntng1	-0.574872	1.52115537521066e-09
Lin52	-0.469462	1.52115537521066e-09
Adam23	0.759081	1.52359640578248e-09
Fbxl2	-0.445106	1.53130849421151e-09
Crebzf	-0.308911	1.53130849421151e-09
Fem1c	-0.336706	1.53130849421151e-09
Ppat	-0.44506	1.53924901015921e-09
Apcdd1	0.74125	1.61422096612157e-09
Tnfrsf21	-0.787134	1.64735443900846e-09
Erg28	0.511986	1.6498122690806e-09
Tnrc6c	-0.419068	1.65625593366343e-09
Epas1	-1.77205	1.65792177800176e-09
Gm26688	-1.93423	1.67170040797307e-09
Sf3b5	0.444142	1.6727306545235e-09
Cyld	-0.456767	1.6727306545235e-09
Mab21l2	-1.01445	1.6727306545235e-09
Usp2	0.841674	1.69726916064776e-09
Egr2	-1.51596	1.71458018590522e-09
Mafb	-0.466809	1.72546575696447e-09
Aspn	0.784048	1.72993618901132e-09
Ccnt2	-0.296646	1.80721480499007e-09
Syde2	-0.816266	1.80725539676963e-09
Alx4	-0.952247	1.81424977535369e-09
Malt1	-0.919779	1.82412896811456e-09
Mrpl33	0.502665	1.84370951703544e-09
Asxl2	-0.306182	1.86001941665245e-09
Muc13	1.40608	1.90588034780567e-09
Usp31	-0.448455	1.91375115595132e-09
Cx3cr1	0.752448	1.93148606400174e-09
Rgma	0.753496	1.93565883395084e-09
Fbxw11	-0.285214	1.96036728279776e-09
Cdc16	0.282149	2.04796842955082e-09
Psme4	-0.250883	2.09317095336753e-09
Cpsf7	-0.297802	2.1174514390896e-09
Sox5os4	-1.54799	2.17741667384752e-09
Paip1	-0.372456	2.20994217360702e-09
Plod2	-0.410323	2.21390027047719e-09
Lrrn4cl	1.65265	2.22101619374755e-09
Rai14	0.370438	2.24207970195604e-09
Churc1	0.517444	2.24789661415183e-09
Epb41	-0.390111	2.25039192932476e-09
Hist1h4i	-0.708945	2.30218933552891e-09
Pou2f1	-0.42226	2.30237869673973e-09
2810032G03Rik	0.768749	2.3440204241559e-09
Vezf1	-0.300741	2.3860786221991e-09
Cep70	-0.551825	2.3860786221991e-09
Clic1	0.445158	2.42683606581107e-09
Gtpbp1	-0.508755	2.49749786784835e-09
Slc1a5	-0.829722	2.59652804085305e-09
Etv4	-1.20862	2.62797176203033e-09
Trpv2	0.840408	2.63740980282101e-09
Acss3	1.00062	2.77724995502526e-09
Ptgfr	-1.37953	2.94010289046764e-09
Ccnt1	-0.252433	2.97750703302253e-09
Nup153	-0.293078	3.0778377080685e-09
Cmtm4	-0.379298	3.46746936513602e-09
Cpeb2	0.662658	3.51767668243898e-09
Atp8a2	-0.613449	3.53253698662353e-09
Actn4	-0.382173	3.59601420093568e-09
Zdhhc12	0.699877	3.68818987664163e-09
Nell1	0.939012	3.72660354525361e-09
Fam76a	0.316644	3.72936359586725e-09
Sfrp5	2.68535	3.74061285523434e-09
Nostrin	0.976014	3.74519545026092e-09
Lsamp	0.528074	3.79151585210718e-09
Dubr	0.642302	3.83643169324559e-09
Syndig1	1.21757	3.8474643104476e-09
Gm536	1.2629	3.9595950798229e-09
Wwox	-0.496514	4.04095800292605e-09
Paqr3	-0.616718	4.05458878634786e-09
Scyl2	-0.447907	4.15136157202657e-09
Zmat1	0.600416	4.2457696142352e-09
Castor1	1.33019	4.26378139687058e-09
Lamb1	0.469418	4.27067127854763e-09
Gata2	-2.4466	4.27361572139025e-09
Csnk1a1	-0.244559	4.29425657071343e-09
Ppp1r1c	0.989094	4.29995296664343e-09
Mtf2	-0.428876	4.30064199840674e-09
Slc39a12	2.89777	4.30064199840674e-09
Rnf152	0.853219	4.30064199840674e-09
Rab39b	-1.09285	4.38324809296361e-09
Ifit1bl2	2.04647	4.43426388710601e-09
Adgrd1	2.80236	4.48218809236406e-09
Pmvk	0.523512	4.50806111807512e-09
Kmt2c	-0.322171	4.66976527178272e-09
Nefl	1.07669	4.7575797134603e-09
Stk39	-0.334771	4.77247569768461e-09
Map3k5	-0.88928	4.88454855421797e-09
Dtx3	-0.302548	4.89052816910738e-09
Kansl2	-0.368624	4.94156211721983e-09
Ccnl2	-0.270185	4.99914671867229e-09
Gm26839	1.02944	5.02461865308883e-09
Emp3	0.749715	5.14637963314968e-09
Sec61b	0.477991	5.21486828919081e-09
Plpp2	-0.934648	5.25275287644464e-09
Col9a3	-0.76323	5.39174786095201e-09
Ebf2	-1.11719	5.41686914033328e-09
Reep1	0.719227	5.52167237490496e-09
Snx12	0.401697	5.6311062123934e-09
Nr6a1os	-0.528953	5.89882869003792e-09
Med9	0.504703	5.93793002930619e-09
Dynlt3	0.526369	5.97920445081649e-09
Tshz2	0.766808	6.05589986482637e-09
Pitx1	-1.14685	6.12009353990427e-09
1110065P20Rik	0.417859	6.19123424427182e-09
Shank2	-0.908366	6.58531676426951e-09
Cdc14a	-0.763365	6.62391328629391e-09
Slc41a3	0.990759	6.76526309745167e-09
Fam111a	0.930582	6.92305078548918e-09
Rnf219	-0.505947	6.95713778076252e-09
Cotl1	0.499163	7.10942511473015e-09
Rfwd3	-0.463203	7.20109580539449e-09
Uxs1	-0.38418	7.44022453695538e-09
Ttpa	-1.09206	7.4591177029853e-09
Arhgap1	0.379596	7.48724194674515e-09
Zfand5	-0.368498	7.60634090441922e-09
Rgs9	0.73997	7.75062569680604e-09
Slc24a3	-0.802753	7.81344956512844e-09
Gm8773	1.57125	7.9078017481326e-09
Tram2	0.334946	7.95137726704896e-09
Mss51	0.534469	7.9812914739602e-09
Vps13a	0.543153	8.27975470262295e-09
Kifap3	0.446337	8.40559677405416e-09
Nova1	0.813301	8.4917852213241e-09
Exoc3	0.313367	8.62573550310153e-09
9130410C08Rik	-1.85476	8.63907760304165e-09
Kctd1	-0.900603	8.63907760304165e-09
E2f3	-0.491927	8.66921726466551e-09
1700123M08Rik	0.632875	8.74306777916262e-09
Grip1	-0.368141	8.91135677225374e-09
Igf2bp2	-0.311959	8.98122556668986e-09
Cxcl13	4.46187	9.06841005012787e-09
Slc6a15	-1.34998	9.09194655175791e-09
Bambi	-0.757456	9.7904912904973e-09
Arid4a	-0.425433	9.83350595452663e-09
B230334C09Rik	0.893041	9.93642820474095e-09
Zmat4	-1.30733	1.00996586831405e-08
A2m	2.89067	1.01265478616448e-08
Ing2	-0.448718	1.01272536931333e-08
Col8a1	0.49582	1.0233349198293e-08
Ccnl1	-0.341548	1.02652819231005e-08
Arsb	0.733692	1.02652819231005e-08
Tbx3	-1.31691	1.06302062592012e-08
Zfp184	-0.643348	1.08013579747667e-08
Lzts1	-0.881081	1.08648236990958e-08
Gbe1	-0.474356	1.09907926945216e-08
Hexb	0.512346	1.11297372052755e-08
Tspan11	0.643137	1.12025527129603e-08
Slc4a10	1.92499	1.13391260933341e-08
Phf20l1	-0.290662	1.14775091310435e-08
Cep112	0.39983	1.14903510833944e-08
Wdhd1	-0.520044	1.15082999924538e-08
Rnf38	-0.540768	1.17256863523737e-08
Prkg1	0.534527	1.17652461827927e-08
Gm17308	1.87272	1.20319456191646e-08
Mapkapk2	-0.403058	1.21185658258827e-08
Gm17106	-0.341621	1.21185658258827e-08
Copa	0.228423	1.21660871993392e-08
B3gnt9	0.749923	1.22035412450781e-08
Cope	0.335024	1.22094888008708e-08
Plekhh1	-1.09943	1.23427363750207e-08
Zmym2	-0.304616	1.25133587745712e-08
Ebpl	0.404522	1.2567087950524e-08
Col15a1	-1.62254	1.28002037726556e-08
Rspo1	0.863938	1.28002037726556e-08
Ctsc	0.947437	1.33383471736447e-08
Shisa3	-1.33726	1.34414257743957e-08
Itgbl1	1.11754	1.34618260191933e-08
Gm47076	1.48855	1.36090528415107e-08
Srek1	-0.247117	1.3757368963589e-08
Atp13a3	-0.430501	1.40075093997867e-08
Sec31a	0.274397	1.41013799380432e-08
Coa3	0.384766	1.43164994029608e-08
Gnai2	0.341818	1.44351981643533e-08
Tex26	1.8688	1.44919379016515e-08
Trpc3	-0.791672	1.46595802373919e-08
CJ186046Rik	-1.96709	1.46693440615551e-08
Gm28055	0.597005	1.50785453250735e-08
Ptpn9	-0.336895	1.53144531768418e-08
Ap2s1	0.370953	1.55919449220516e-08
Cnn1	0.95501	1.58459762415529e-08
Dlx6os1	-1.27965	1.60114845708856e-08
Hsd17b12	-0.389618	1.60974277910377e-08
Itm2c	0.434238	1.61033405448663e-08
Med10	0.405341	1.66029032538406e-08
Ppa2	0.335005	1.66178597381511e-08
Rbpj	-0.366474	1.69737182119098e-08
Il18	0.805934	1.72008570531893e-08
Rnf128	-1.30505	1.72190590265389e-08
1110017D15Rik	0.818744	1.72892567165985e-08
Ppp3ca	-0.386546	1.72892567165985e-08
Frzb	-2.11532	1.74218678895143e-08
Gm11627	0.771506	1.74289352060266e-08
Ptcd3	-0.340009	1.74745121789605e-08
Isoc1	0.434886	1.75160137540072e-08
Gm41790	1.09085	1.76729319137536e-08
Gm12305	2.46052	1.80594074002047e-08
Wnt9a	0.758234	1.82476330147131e-08
Shisa2	-0.727867	1.82476330147131e-08
Dusp2	-2.26638	1.83309749673557e-08
Cthrc1	0.696657	1.85175406416143e-08
Mmp9	-1.41162	1.90740857313906e-08
Rab13	0.516887	1.93044680037476e-08
Fam135a	-0.398091	1.93044680037476e-08
Sdhaf4	0.378204	1.97329763781589e-08
Snx7	0.705098	1.97329763781589e-08
Rgs3	-0.457898	1.99926958989564e-08
Ptbp3	-0.299134	2.01594808034048e-08
Cd81	0.63759	2.04205805377695e-08
Herc3	-0.50027	2.07777687982743e-08
1700120O09Rik	-1.24513	2.17191874273693e-08
Calm1	0.378118	2.21849488311733e-08
Stom	0.632596	2.23068731101029e-08
Zfhx4	0.576178	2.23440409196153e-08
Pheta2	0.805151	2.2522043813305e-08
Oxr1	-0.543992	2.27814387212321e-08
Gm13561	1.67176	2.28191464967727e-08
Kansl1	-0.217974	2.30198256212245e-08
Hnrnpa1	-0.294265	2.380697433824e-08
Gm35696	1.44826	2.38698837676742e-08
Gm15283	-0.56128	2.39048570223729e-08
Rps6ka2	-0.588717	2.42766838597171e-08
Gm12064	-0.970291	2.49780207367562e-08
Cx3cl1	-1.60044	2.49780207367562e-08
Zfp9	0.355688	2.52631200770158e-08
Utp14a	-0.350157	2.52631200770158e-08
Vegfa	-0.43633	2.55135048640963e-08
Ss18	-0.338148	2.55135048640963e-08
Zfp422	-0.408092	2.56026436540563e-08
Zfp787	-0.461717	2.6809472126521e-08
Heatr1	-0.539189	2.72505513837495e-08
Zar1	1.18484	2.74623997802351e-08
Col13a1	-0.842305	2.81222662795084e-08
Ncln	0.591328	2.85189160589541e-08
Srm	0.381271	2.87947168542081e-08
Pigs	0.410609	2.92003789137239e-08
R3hdm1	-0.366933	2.94206348236843e-08
Pdzrn4	-0.937045	2.95329754629307e-08
Kpna1	-0.335928	2.97228263076266e-08
Gm20732	-0.390493	2.99006363050574e-08
Lratd2	-1.14227	3.00167103244819e-08
Olfml3	0.77905	3.0772804719088e-08
Wdyhv1	-0.454149	3.11834825887817e-08
Axl	0.485565	3.19413881517607e-08
Cyba	0.570118	3.19413881517607e-08
Me3	-1.27297	3.22954287485579e-08
Zfp503	0.78743	3.35473167539312e-08
Dancr	-0.754469	3.59072524456532e-08
Txlnb	0.863818	3.59378842446809e-08
Tuft1	-1.12216	3.62614751451728e-08
Taok3	0.501035	3.63107793676815e-08
Arhgdia	0.400479	3.63107793676815e-08
Mvk	0.652479	3.64738341807247e-08
B2m	0.730457	3.65356461643537e-08
Fabp5	0.624726	3.65490644480016e-08
Prps1	-0.511296	3.67206908684546e-08
Rnh1	0.37843	3.67988845496114e-08
5430416N02Rik	-0.473091	3.74018657176145e-08
Cox4i2	-0.657593	3.75842760089348e-08
Grip1os3	-1.17595	3.76820902681272e-08
Gm16552	-0.616047	3.82406284848997e-08
Glipr2	0.570502	3.85837709299393e-08
Cry1	-0.348772	3.96487426315044e-08
Nedd4	0.21342	3.99493134586555e-08
Clock	-0.37966	4.08498745111155e-08
Chmp3	0.284184	4.12257276318181e-08
Pard3b	0.321707	4.12386581455479e-08
Ubc	0.392442	4.19080626303664e-08
Fmnl3	-0.4679	4.19555840637137e-08
Ssr1	0.36652	4.23603336946529e-08
Myoz3	0.890103	4.26900560938903e-08
Tspan2	-0.538819	4.34913094720651e-08
Chpf2	0.486809	4.36243177172313e-08
Ippk	-0.460049	4.47576293375994e-08
Sema6c	0.583777	4.48051506944952e-08
Gnb2	0.364524	4.51635902620595e-08
Mcm7	-0.522642	4.54021729811355e-08
Pdzd11	0.372436	4.58129469410479e-08
Tank	-0.347538	4.60284419045066e-08
Gtf2f2	-0.352622	4.69104588856197e-08
Ak5	0.66708	4.71619300056431e-08
Dock1	0.338827	4.79174649125262e-08
Grasp	-0.374544	4.83698436414379e-08
Cnksr3	-0.525296	4.88664352286293e-08
Ptprt	-1.23059	4.8955478483462e-08
0610040J01Rik	-1.47121	4.9804776191268e-08
Tex29	1.23708	4.98918829009961e-08
1600020E01Rik	-0.45077	5.17948896800781e-08
Hykk	0.459242	5.24829794695747e-08
Lrmda	0.836715	5.30731764129076e-08
Hs3st3a1	-0.533031	5.34516240563288e-08
Krt19	2.62052	5.3507507630265e-08
Phgdh	-0.487725	5.44008062702614e-08
Dgke	-0.758162	5.48191786000458e-08
Hmga2	-0.779281	5.50556415854761e-08
Papola	-0.217239	5.66002854795225e-08
Idh1	0.537091	5.7124342275147e-08
Chst15	-0.565371	5.72668108619862e-08
Rbfox1	0.697254	5.79684751764452e-08
Racgap1	0.727983	5.84046225276363e-08
Npdc1	0.992458	6.06835076633798e-08
Steap3	1.16677	6.25631175480609e-08
Chid1	0.491506	6.27429357100507e-08
Akirin1	-0.367947	6.31524180756547e-08
Rbm20	-0.794394	6.48430291088744e-08
Gm11084	0.560006	6.62034283567253e-08
Gm1113	2.27932	6.63313505630247e-08
Ptgr1	0.45944	6.73492458035177e-08
Dlg3	-0.557912	6.79321612844959e-08
Pinx1	-0.442305	6.85148497399368e-08
Gcnt1	-1.7485	6.85264633796759e-08
Gm47644	0.824433	6.85264633796759e-08
Mtpn	0.228126	6.85798138185906e-08
Pcnx4	0.455624	6.92472690079053e-08
Arih1	-0.298583	6.93168780813136e-08
Arpc1b	0.637195	7.01659979915515e-08
Gm30003	0.787789	7.01823741826911e-08
Mesd	0.35617	7.09861764864486e-08
Aida	0.311948	7.09861764864486e-08
Sulf1	-0.412876	7.16475181361481e-08
C79798	-0.648694	7.16475181361481e-08
Rasa2	-0.257852	7.16475181361481e-08
Ric8a	0.500986	7.21165444749921e-08
Atraid	0.440149	7.31533506013492e-08
Spred2	-0.349849	7.34647873659966e-08
Mxd1	-0.528191	7.46047631460378e-08
Smad1	0.350638	7.49225802062204e-08
Ralbp1	0.296878	7.56703662135562e-08
Ets1	-0.621223	7.56703662135562e-08
Adra2c	2.34802	7.86600221980615e-08
Actl6a	-0.433447	7.90407651360538e-08
Ednrb	-1.1962	8.08672369491493e-08
Hsp90b1	0.370216	8.27900557636539e-08
Arhgap24	-0.701824	8.3218399437084e-08
A430106G13Rik	-0.769691	8.3218399437084e-08
Arhgef7	0.365975	8.48233028992769e-08
Pcp4	-1.11259	8.89828059836511e-08
Ppp1r12b	0.305009	9.11479900473868e-08
Ssr2	0.438546	9.13016975479055e-08
Tmem132b	0.928507	9.34138983790431e-08
Adprh	0.427229	9.38945513012897e-08
Enc1	-0.642373	9.38945513012897e-08
Gm13919	-0.647547	9.38945513012897e-08
Wasf3	-0.529368	9.38945513012897e-08
Dnah11	0.866787	9.4124127701172e-08
Gpbp1l1	-0.283542	9.47643270388086e-08
Elovl5	-0.400643	9.4955039553764e-08
Tm9sf4	0.252548	9.57312989329668e-08
Cables1	-0.729469	9.8546015041773e-08
Slc18b1	-0.540984	1.01264871026855e-07
Gatad2b	-0.235713	1.02185598625913e-07
Pdia5	0.554725	1.02848473602094e-07
Gm10848	-0.867125	1.02914233388202e-07
Slain1	-1.42177	1.032413693324e-07
Arf5	0.459563	1.03834537512676e-07
Btg3	-0.434322	1.03834537512676e-07
Camk1	0.297594	1.06117752342073e-07
Snap25	0.884006	1.07122007759859e-07
Brdt	0.425994	1.07771647602923e-07
Fabp7	-0.98535	1.08740564231788e-07
Pcgf6	-0.561598	1.1140003115959e-07
Pdlim4	-0.354959	1.11753541091595e-07
Dlg1	0.206436	1.12807801247638e-07
Lefty1	1.3602	1.12807801247638e-07
Klf8	-0.71954	1.12850540552464e-07
Pik3cb	-0.535208	1.12960739791705e-07
Tgfa	-1.76357	1.13527288606498e-07
Fam20a	-0.558822	1.13918331586334e-07
Mdm2	-0.279292	1.14656666984345e-07
Mgarp	0.937636	1.16277789036812e-07
Syngr2	0.591666	1.16893036263905e-07
Uhrf1bp1l	-0.407965	1.21365757831695e-07
Tspan15	-0.98649	1.2214203877611e-07
Hsd17b10	0.344114	1.22820978326238e-07
Zdhhc21	-0.441922	1.2362858476643e-07
Slc25a11	0.306459	1.24675401632017e-07
Acp5	1.4641	1.24680087246035e-07
Tmem50a	0.32218	1.25171454888141e-07
Olfr1033	1.16617	1.26308805936122e-07
Entpd5	0.635538	1.31331516057426e-07
Upp2	0.469246	1.32090140685981e-07
Cmtm8	-0.921837	1.32090140685981e-07
Tln1	0.345344	1.32411073931059e-07
Gm48837	1.98952	1.34240162484095e-07
Cd55b	2.65688	1.34240162484095e-07
Fzd7	-0.408201	1.34933945195381e-07
Zfp385b	2.16004	1.34933945195381e-07
Gpi1	0.343762	1.35048122433584e-07
Prok2	1.57832	1.35099324447598e-07
Hmgxb3	-0.375063	1.36051985745465e-07
Gm6567	4.56855	1.37109509978734e-07
Slco1c1	0.813689	1.38718215104764e-07
Scfd1	0.300378	1.39049427702495e-07
Triobp	0.431875	1.39049427702495e-07
Faxc	-0.437639	1.39049427702495e-07
Lims2	0.732754	1.4206622378543e-07
Snhg11	0.807901	1.44209435665055e-07
Rbm26	-0.234252	1.45152601912331e-07
Selenow	0.35204	1.45160917087132e-07
Fzd9	-1.13012	1.45579940170735e-07
Zfp644	-0.353129	1.45920927097908e-07
Trappc1	0.507409	1.46137913554047e-07
Gpc2	-0.529209	1.46608965697266e-07
Dclk3	-1.4415	1.47114668319088e-07
Yrdc	-0.517848	1.48688716080984e-07
Rap1b	0.237184	1.49628251502987e-07
Osbpl9	-0.217642	1.52827264132194e-07
Col11a2	-0.782293	1.55584801531092e-07
Mical3	-0.392036	1.57535648165902e-07
Rab5a	-0.198298	1.57931253276516e-07
Gm26749	-0.459246	1.57931253276516e-07
Ddhd1	-0.45149	1.62028540269106e-07
Dclk1	0.456748	1.62365609108608e-07
Podn	0.833927	1.62700604834413e-07
Car2	-1.19139	1.63687823318684e-07
Lrrc1	-0.611185	1.63975236147818e-07
Gm33206	-3.28355	1.64015213573118e-07
Epc1	-0.297812	1.64920206849006e-07
Gm32067	-1.44987	1.65101300349422e-07
Ptprd	0.391874	1.65649445303374e-07
Siae	0.453921	1.66738543606072e-07
Irx3	0.689408	1.66965944527211e-07
Rprd1b	-0.313418	1.671790074426e-07
Lamtor4	0.448122	1.70468470299042e-07
Cox6a1	0.389721	1.72549898494922e-07
Il11ra1	0.36406	1.7255745404805e-07
Mef2c	-0.897684	1.73490014177511e-07
Hs2st1	-0.494534	1.75583193104251e-07
Ttyh3	0.386465	1.83597492415571e-07
Maged1	0.36586	1.83880110696999e-07
Nfxl1	-0.388083	1.83880110696999e-07
Gm6878	-1.46493	1.84577421378097e-07
Inava	-0.754945	1.87890312593079e-07
Arpc3	0.393693	1.88239923829572e-07
Grpr	1.53102	1.90906335108591e-07
Fbxw8	0.303043	1.91127118190354e-07
Tmem120a	0.48334	1.91273597953467e-07
Cbfb	-0.388848	1.91289673504624e-07
Nasp	-0.407873	1.95910303640499e-07
Slc6a20a	0.760866	1.959893157336e-07
Hcrtr2	-1.47181	1.97715973021182e-07
Med12l	-0.540803	1.98776885025594e-07
Ccdc42	2.62327	2.00485557941984e-07
Luc7l	-0.245588	2.01484128499649e-07
Akr1b8	0.802164	2.04929488653038e-07
9330182L06Rik	-0.648724	2.06274518486918e-07
Gm38560	1.24208	2.06500508042927e-07
Sh3glb1	0.252838	2.06873554584836e-07
Dok5	0.526612	2.1100269569712e-07
Apoe	0.845831	2.11229308467693e-07
Simc1	-0.349812	2.1138387830628e-07
Gm37982	-1.11362	2.14491094198562e-07
Alcam	0.757286	2.16077514193033e-07
Mpv17	0.37107	2.17803613604152e-07
Col4a5	0.508611	2.24010299835332e-07
Moxd1	-1.24091	2.24811589147856e-07
Kdelr2	0.533438	2.2635226626834e-07
Dzip1l	-0.483846	2.29925922243504e-07
Ambra1	-0.202919	2.38257621073788e-07
Fth1	0.408201	2.40562490132283e-07
Selenop	0.875031	2.41431262042307e-07
1810058I24Rik	0.394058	2.45047903987009e-07
Exoc6	-0.806159	2.45593142251275e-07
Gtpbp4	-0.335405	2.46687970002896e-07
Naa15	-0.323311	2.47246899595862e-07
H3f3b	-0.414931	2.49353216659742e-07
A330093E20Rik	1.61212	2.51724596097898e-07
Ubxn7	-0.232606	2.52576218857011e-07
B4galnt3	-1.40679	2.55283375718289e-07
Spata13	-0.646155	2.56246786525279e-07
Sorcs3	0.662601	2.5632358483892e-07
Cep44	-0.34095	2.565878976109e-07
Tacc1	-0.447727	2.66032608161101e-07
Utp6	-0.386046	2.69986365515593e-07
Sptssb	1.51493	2.71253878340333e-07
Col9a2	-0.82186	2.78103763910771e-07
Foxp4	-0.532238	2.82631886603363e-07
Efhb	0.579427	2.82897018140927e-07
BC048602	0.93852	2.87579500595162e-07
Epyc	0.971021	2.90591180056009e-07
Gm960	0.595725	2.92444076080061e-07
Mrln	0.886865	2.94376059366212e-07
Wipi1	0.388074	2.95799485960418e-07
Gabrb1	-0.857347	2.96480514968316e-07
Gm17501	-0.492629	2.96566331075399e-07
Mcrip1	0.402251	2.96895422316185e-07
Mia3	0.249996	3.06003913304376e-07
Cttnbp2nl	-0.582028	3.13727570628787e-07
Npc2	0.370422	3.15648588970599e-07
Rassf1	-0.397517	3.15658965351688e-07
B3gat1	-1.19139	3.15815442165442e-07
Grm3	1.18614	3.17810573101705e-07
Mthfd1l	0.41204	3.17810573101705e-07
Frrs1l	0.46744	3.19174749194858e-07
Pea15a	0.400948	3.25474434464528e-07
Cnrip1	0.489521	3.27408364888248e-07
Nxnl2	1.2998	3.32140756679302e-07
Rrs1	-0.537202	3.32207518535846e-07
Pcsk7	-0.375017	3.32559977485052e-07
P3h4	0.545786	3.3755473865266e-07
Cdr1os	0.448698	3.42385246775958e-07
Htra3	1.44985	3.46526186151502e-07
Snrnp48	-0.286561	3.47246859551684e-07
Fbxo2	-1.84343	3.48371340270838e-07
Mpc2	0.334369	3.48388396797364e-07
Xpo7	-0.256958	3.50302955809066e-07
Nln	0.427665	3.6066506027009e-07
Ywhab	0.286459	3.61983030303033e-07
Kitl	1.40669	3.61983030303033e-07
Srfbp1	-0.42914	3.62649423985578e-07
Rgs22	0.603439	3.631191035061e-07
Thoc6	-0.499594	3.65517082360445e-07
Snn	0.473986	3.65906957224925e-07
D7Ertd443e	1.31795	3.77917447516275e-07
Gm29418	-1.12002	3.86002421929675e-07
Gm33474	4.49854	3.91568448748901e-07
Rnf115	-0.307061	3.93785751106685e-07
Snhg20	-0.53718	3.95496312324315e-07
Rac1	0.211649	3.9553445865116e-07
Ephx4	0.811003	3.98445652010836e-07
Gabbr1	-0.325774	3.98705840051073e-07
Ubn2	-0.254006	4.08674325855814e-07
Dip2c	-0.207859	4.08995982033147e-07
Bicc1	0.443767	4.08995982033147e-07
Arc	-2.00437	4.09167759014643e-07
Krtcap2	0.483881	4.09473365347412e-07
Txk	1.46628	4.13282118616844e-07
Gm46401	1.89166	4.18881652052998e-07
Rnd3	0.396966	4.23313949874074e-07
Yif1b	0.417703	4.25865926498656e-07
Camk1d	0.735327	4.3489069003278e-07
Hexa	0.435096	4.3489069003278e-07
Foxf1	-2.36907	4.37205907530947e-07
Ubxn2a	-0.395511	4.37402200092834e-07
Gm16564	-1.00612	4.37447885385119e-07
Fam53b	-0.854181	4.4087898875124e-07
Tmem43	0.491885	4.4087898875124e-07
Prpf40a	-0.245388	4.42680578346867e-07
Atp11b	-0.383524	4.42680578346867e-07
Gm11250	-0.955097	4.43175327798601e-07
Kantr	-0.366372	4.45062992984443e-07
Mrgprf	2.58192	4.46334062323929e-07
Slc25a31	1.08387	4.46787502553592e-07
Sike1	0.342658	4.46787502553592e-07
Ndst3	-1.07947	4.46865870139905e-07
Gm13944	2.35335	4.53152769882064e-07
Rbm47	-0.495281	4.55591615202149e-07
Mob3b	-0.870716	4.57621630844288e-07
Gria3	0.462342	4.57621630844288e-07
Fgf9	1.2014	4.6019661563157e-07
Col6a6	2.37059	4.63812272808019e-07
Mak16	-0.431904	4.66506194169355e-07
Gm49575	1.87852	4.75481691524614e-07
Blnk	-2.66766	4.80579163699879e-07
Trerf1	0.340579	4.82623883255825e-07
Coro1c	-0.356753	4.82623883255825e-07
Rab40b	0.619077	4.82817758755126e-07
Map1lc3a	0.38131	4.83468471042478e-07
Tle4	-0.447709	4.8904368521113e-07
Tcta	0.681858	4.93229467704361e-07
2810013P06Rik	-0.49291	4.95792878807219e-07
Kcna4	1.32891	4.95792878807219e-07
Rad54l2	-0.400992	5.00667665641768e-07
Pank1	-0.528204	5.03914468378595e-07
Tcf7l2	-0.418699	5.05127574972302e-07
Stk32b	-1.0508	5.06618404674627e-07
Fxyd7	-1.04652	5.07131677157532e-07
Rora	-0.415549	5.0773147187594e-07
Tbc1d2b	0.498008	5.0773147187594e-07
4930438E09Rik	-1.17159	5.16649785041184e-07
Mea1	0.439129	5.16649785041184e-07
Tmem42	0.700949	5.20706833244353e-07
Akap17b	-0.537032	5.2682206075076e-07
Ctdp1	-0.525445	5.26876587694475e-07
Zfp326	-0.292689	5.32283931256496e-07
Cdkl4	0.633333	5.39554531222361e-07
Msn	0.326011	5.43131613113243e-07
Ccdc134	-0.561934	5.51872671309891e-07
Myef2	-0.290207	5.55294401729093e-07
Ubac2	0.341294	5.56650266443376e-07
Kcnh7	-1.20262	5.67178491043517e-07
Canx	0.241446	5.67776771453527e-07
Helb	-0.482355	5.71074209717563e-07
Dmp1	-3.63634	5.72025781508743e-07
Sgca	1.35562	5.76974378880939e-07
Stx6	-0.368743	5.8360377773141e-07
Rad21	-0.218893	5.90277868086411e-07
Cyp26a1	-2.49171	5.93833623936707e-07
Xpr1	-0.583185	5.99529567078798e-07
Cab39	-0.359486	6.01156970210176e-07
Rragb	-1.11055	6.12382152813276e-07
Pcf11	-0.281392	6.1398126817402e-07
Cntn3	0.62879	6.19114048417476e-07
Ctdspl	-0.312877	6.20272246534313e-07
Tceanc	0.656248	6.2652714740361e-07
Col5a3	1.63935	6.27565966929355e-07
Cstb	0.525794	6.27752313570315e-07
Stac	-1.39921	6.32554740695738e-07
Atxn10	0.204725	6.3336013792239e-07
Gm11444	-1.27075	6.41946474465257e-07
Polb	-0.27645	6.4834466841056e-07
Cspg5	0.480893	6.597993780073e-07
Mon1a	-0.711983	6.60230111125136e-07
Mlf1	0.665477	6.60230111125136e-07
Rgs7bp	0.795395	6.62514161951591e-07
Sspn	0.538769	6.6323191713242e-07
Hhip	-0.9927	6.70664041439501e-07
Fat3	-0.672018	6.75985637295335e-07
Prl2c3	1.31262	6.76358864144052e-07
Gltp	0.523591	6.76358864144052e-07
Armh4	0.670213	6.76358864144052e-07
Mrps24	0.349803	6.79066373094271e-07
Impad1	-0.279578	6.80042381459965e-07
4930503L19Rik	-0.494925	6.84847364890158e-07
Sept8	0.505145	6.87063158393609e-07
Dyrk1a	-0.331342	6.93807660043447e-07
Fnip2	-0.412995	7.01358206551237e-07
Cdca7	-0.5626	7.02650044421473e-07
Rasef	-1.87355	7.03553420065599e-07
Cfap74	0.684601	7.04031145283837e-07
Ythdc2	-0.365623	7.2167876899436e-07
Anxa7	0.323341	7.26887025347795e-07
Rab22a	0.31076	7.35103197244384e-07
Wasl	-0.21558	7.36293908202569e-07
Matn2	0.783938	7.39330889909573e-07
Zfp219	-0.580651	7.59490234596031e-07
Ccdc112	-0.365453	7.60494411805634e-07
Bora	-0.480199	7.66476314622834e-07
Plp2	0.669228	7.69759131001177e-07
Traf3ip1	-0.491182	7.69824562225703e-07
Zbtb25	0.453499	7.70551183142604e-07
Itpripl2	0.386133	7.75109681240954e-07
Lmtk2	-0.363987	7.75583215724785e-07
Ilf2	-0.284916	7.7564553386521e-07
Aldh1a2	-1.77219	7.82603529970901e-07
Mtmr10	-0.495662	7.91490114703983e-07
Ric1	-0.315026	7.96568603614071e-07
Map2k4	-0.268364	8.01398348762993e-07
Snap23	0.315809	8.11497575393592e-07
Gm9844	1.02813	8.14398844453783e-07
Qrsl1	-0.623973	8.23050280511365e-07
Hs3st6	-1.50279	8.4346214013362e-07
Brwd3	-0.428645	8.43568256119164e-07
Hoxb3os	1.37508	8.43664638977954e-07
Arsa	0.721732	8.46218794740504e-07
Fkbp11	0.590788	8.47823244880517e-07
Tjp2	-0.488298	8.50897276555553e-07
Syt14	-0.425921	8.51291395955281e-07
Huwe1	-0.289836	8.52883709900654e-07
Ngly1	0.34136	8.57055893115868e-07
Emp2	0.404958	8.81044325363743e-07
Ascc3	0.228283	8.85964929833634e-07
B230217O12Rik	0.69593	8.89790333085633e-07
Rph3al	-0.829904	8.94126813999121e-07
Bsg	0.401716	8.97809295576092e-07
Tmem106b	0.350021	8.99274070488779e-07
Tmc6	-0.805128	9.14842163153026e-07
B4galt4	0.56719	9.1671271575814e-07
Slc1a1	-1.6785	9.19443878304325e-07
Decr1	0.538454	9.19606698383622e-07
Fastk	0.394256	9.22438642385002e-07
Smtn	0.52489	9.28854571294565e-07
Cacna1h	-0.688581	9.3434425813058e-07
Map1a	0.778576	9.36148589250576e-07
Tpm4	0.292836	9.59453066184306e-07
Vps35l	0.295672	9.63285051197301e-07
Atp8b5	0.77103	9.659518711853e-07
March6	-0.237213	9.73542382266953e-07
Csnk1g3	-0.231425	9.85185491166416e-07
Hsd17b7	0.456785	9.8601920783651e-07
Fgf21	2.49252	9.90837357521934e-07
Zc3h12c	-0.385277	9.98732985591893e-07
Acsl1	-0.832288	1.01853346164605e-06
Itgav	-0.315294	1.0280036287592e-06
Pank2	-0.256229	1.06686354077062e-06
Gm19303	-3.27	1.07499913709774e-06
Mrgprd	4.60672	1.07984308138084e-06
Hoxd3os1	2.97152	1.10286223084242e-06
Tmem120b	0.584202	1.11571520236893e-06
Pir	0.969607	1.117820443143e-06
Atoh8	0.535808	1.12470511595887e-06
3010003L21Rik	-0.755487	1.12846216445944e-06
Cd1d1	-0.506158	1.13533943428665e-06
Phf6	-0.443031	1.1420625021183e-06
A930004D18Rik	0.651235	1.15171914274526e-06
Kank4	0.454682	1.15247984991728e-06
Yipf5	0.248141	1.1586079972898e-06
Cstf3	-0.27444	1.1692102168221e-06
5031425E22Rik	0.323241	1.17782527455407e-06
Slc7a6	-0.402251	1.18583007348669e-06
Mfsd2a	-1.71753	1.18789031626043e-06
Cdh11	0.489914	1.19825505654385e-06
Fkbp7	0.528364	1.20104695120835e-06
Cmtm5	-1.77627	1.20213273591923e-06
Tulp1	0.707579	1.21359598509589e-06
Kdelr1	0.425793	1.21725438815544e-06
Synj2bp	-0.240688	1.22109319857781e-06
Mrtfa	-0.306987	1.22315593616804e-06
Tnfrsf1a	0.419869	1.23241075192548e-06
Zc3h8	-0.627757	1.24329031393954e-06
Slc5a3	-0.463873	1.24489627004481e-06
Efnb2	0.440429	1.25735353246921e-06
Osgin2	-0.669054	1.26458868507308e-06
Col6a3	0.534708	1.273742196658e-06
Fgf7	1.00205	1.29389651252517e-06
[truncated: 19,697 more rows]
