# Supplementary material for: Eed controls craniofacial osteoblast differentiation and mesenchymal proliferation from the neural crest
Source: eLife. 2025 Dec 2;13:RP100159. doi: 10.7554/eLife.100159 (PMC12671911; doi:10.7554/eLife.100159)
Supplement: Supplementary file 5. [file elife-100159-supp5.xlsx]

## Sheet: Supplementary_File_5
Supplementary File 5. Differential gene expression between C4 and C5 from single-cell RNA sequencing.
gene	log_fc	padj
Twist2	-2.56287	1.30191350453974e-145
Sparc	-1.41827	1.30191350453974e-145
Col1a2	-1.51035	5.30989735313036e-144
Mecom	2.07483	1.32312537412459e-109
Col1a1	-1.81158	7.83427124819385e-107
Veph1	-3.57158	1.24151766435751e-104
Erc2	-1.25321	2.43186606032774e-103
Arhgdib	-3.18965	9.87754515283711e-100
Grem2	-3.5004	1.659910368538e-94
Apcdd1	-2.90974	1.659910368538e-94
Acta2	-4.54686	4.42864462250872e-87
Irx5	-2.63883	1.37929668551492e-85
Lum	-2.56689	3.64048319703413e-83
Slc24a3	1.47848	1.56470659386406e-82
Nebl	-2.61526	4.06924960853023e-81
Pth1r	-1.37715	1.12040236639603e-78
Apod	-3.81842	1.65190483976756e-77
Vgll3	-3.39508	2.06695619046739e-77
Irx1	-2.75892	4.34433510415941e-77
Akap12	-1.64373	5.51022959084355e-77
Irx3	-3.15754	6.56585857007098e-77
Cavin3	-2.51714	7.12475598697099e-77
Capn6	1.8156	5.73294752488776e-71
Trpc5	3.5966	3.96212608457986e-70
Itgbl1	-4.61581	4.31525910084948e-70
Col9a3	-2.49048	1.53816803084831e-68
Sema5a	-1.09928	5.36597051289818e-68
Wnt4	-2.23714	5.79997156752127e-68
Zic4	-3.10162	2.45081437504054e-66
Ebf2	3.26626	2.45081437504054e-66
Rtl4	3.10135	2.52767009355635e-66
1700120O09Rik	3.38058	3.70182611252398e-66
Sema3c	-1.86972	5.21956571110357e-66
Asb4	3.37254	9.93102576191445e-62
Tagln	-2.1716	1.19474962649121e-61
Fzd8	1.96808	1.41512539760568e-57
Rgs6	-1.99822	2.83880713477197e-57
Tnmd	-3.19489	4.74913452209012e-57
Meox1	3.10201	1.49573484136616e-56
Fzd4	1.66412	4.26216277556354e-53
Fbln2	-1.42463	1.81704142116694e-52
Grik4	1.36339	9.80444425343647e-52
Col2a1	-2.00593	1.05898181207937e-51
Fzd10os	-2.75995	1.63810102370126e-51
Mical3	1.0088	6.97247810027941e-51
Cryab	-3.50471	2.54830413841847e-50
4930438E09Rik	3.28271	2.82544511417574e-49
Ebf3	1.29619	1.27092466259113e-48
Robo2	-0.82818	1.35736812507367e-48
Mpzl2	2.34265	1.20435664642747e-47
Tmem132c	-2.45255	2.03328067967784e-47
Wls	-0.796713	6.13229904527459e-47
Stard8	-2.32084	8.28778121092806e-47
Haglr	-3.26874	1.42811440453796e-45
Spock3	-1.4699	1.70385808188667e-45
S100a10	-1.23936	8.34645726633713e-45
Ddah1	-1.07	9.99519005427923e-45
Hpgd	-2.48732	1.21690363364796e-44
Fhl2	1.12471	3.72018374184216e-44
Cpxm2	-3.75272	1.21062788240054e-43
Pde7b	-1.39015	4.00918970462971e-43
Wnt5a	-1.33999	1.90551968359859e-42
Amot	1.6518	2.1897968521871e-42
Npas3	-1.2685	6.54751531188775e-42
Bend5	-1.26501	1.98417104371698e-40
Cntn5	-2.26226	3.51424076212608e-40
Sobp	0.89215	1.81858906262455e-39
Kynu	-3.92919	1.99552490994211e-39
Hmx1	-2.22482	1.02655906396367e-38
Lrrc7	-2.11721	1.83986989424681e-38
Cpz	-2.90479	2.44280304402963e-38
Rpl39l	-3.62849	2.44280304402963e-38
Dab2	-1.03741	3.00012606091494e-38
Dgkk	2.31375	4.277955997149e-38
Bcl11b	-2.25615	9.3750529032163e-38
Lix1	-2.01343	2.97587540226453e-37
Hpse2	-1.68115	4.42112844644827e-37
Scg2	-3.0871	4.85467845325667e-37
Gm40999	-2.80975	7.62901234168035e-37
Anxa2	-1.13327	1.11984616736165e-36
2610316D01Rik	-1.68042	1.2909138103784e-36
Igf1	1.1827	1.5843964721985e-36
Dcn	-1.90761	1.72280143820041e-36
Pitx1	2.33926	4.74833838666647e-36
Gm6878	3.38405	5.6355315219783e-36
Prokr2	2.93833	8.74018345361575e-36
Efna5	-1.25589	1.11639491303824e-35
Col7a1	-3.13129	2.88778970216577e-35
Calb2	-4.39442	3.05748143992182e-35
Ptchd4	-2.94009	8.82841544566826e-35
Cdh2	0.794202	9.84236919791112e-35
Lox	-1.60905	1.96422364783887e-34
Hacd4	-1.38591	3.7096215378256e-34
Serpinh1	-0.874013	5.18220256305638e-34
Vim	-1.34332	8.84131293466073e-34
Thbs1	-1.47548	1.25787835810812e-33
Ank3	0.929073	2.2016264732359e-33
Lgi1	3.66194	2.77688377883687e-33
Gli3	0.689529	3.56613875988648e-33
Adk	-0.96536	3.84536161667998e-33
Serinc2	1.1343	4.09233828981219e-33
Bbx	0.633851	5.50874653206599e-33
Svep1	-1.36831	1.28547695324472e-32
Lgals9	-1.64806	1.99122014716157e-32
C1qtnf3	-3.39845	2.11029870139926e-32
Cpq	-1.66276	4.66248987986518e-32
Serpinb1a	-4.20256	1.02418929073105e-31
Mybpc1	-3.14907	1.13215307603629e-31
Col8a1	-1.90646	1.55153627684217e-31
Rspo1	-3.35031	4.59121521597866e-31
Erbb4	-1.6089	5.74214176083073e-31
Bmpr1b	1.65008	8.96390586319807e-31
Hoxd1	-3.43736	9.53134781315825e-31
6530403H02Rik	-3.54073	1.34325565818515e-30
Twist1	-1.40779	1.42919201767108e-30
Pcolce	-1.47433	2.46010454781083e-30
Gm49708	-3.03982	2.49053399384106e-30
Thbs2	-1.63167	2.85048959960448e-30
Adh7	-4.33345	3.35722824411854e-30
Prkg1	-1.16898	1.93877453611198e-29
Barx1	2.51276	2.20788306605615e-29
Apba2	-1.71607	2.219860052103e-29
Tpm2	-1.6575	4.00336729010928e-29
Ctnna2	-2.97606	4.64875146914701e-29
Srpx	-1.31425	1.5209120696367e-28
Trps1	0.831779	1.57331781846859e-28
Mthfd1l	-1.22883	1.80295153088985e-28
Pde1a	2.41073	2.60230225513206e-28
Id4	-1.36443	2.94350274676777e-28
Fat3	1.19808	3.36950220552591e-28
Gm29101	-2.53918	3.91867158125021e-28
Eif4ebp1	-1.4339	6.81249941228977e-28
Gatm	-3.02495	7.94321268983886e-28
Fndc1	-2.16776	1.17015431644848e-27
AW551984	-0.663401	1.32006622011755e-27
Kirrel3	0.989638	1.60909336169625e-27
Aass	-1.72734	1.84789803841474e-27
Reck	-0.944177	1.86899634520425e-27
Ch25h	-2.41368	2.88936082519848e-27
Adamtsl1	-1.09793	4.79767948622637e-27
Lipa	-1.0191	4.9239547883821e-27
Nt5e	-2.26725	5.11314530399335e-27
Ntn1	-1.54768	1.51340714161955e-26
1190005I06Rik	-0.940235	1.98467557334332e-26
Racgap1	-1.51877	3.22700631377672e-26
Galnt17	-1.11234	3.42390930548505e-26
Itga4	-2.34126	3.4509823480233e-26
Nkd1	-1.54796	7.81725028654707e-26
Gna14	-1.63603	9.41404271732237e-26
Snca	-2.48063	1.10946442049116e-25
Zbtb20	0.669162	1.86788891851188e-25
Aebp1	-1.61588	1.92181458044404e-25
Gpx7	-1.20884	2.14539456598087e-25
Lrrc17	-0.947744	2.90544983223763e-25
Pde9a	1.09874	3.07090642754172e-25
Tmem132cos	-2.4798	3.28485669458762e-25
Gm29478	-3.27445	3.28485669458762e-25
Stac	2.68598	6.34984930454481e-25
Stmn2	-1.64513	6.91294506144687e-25
Diaph1	0.597445	1.15712137447357e-24
Klhdc10	0.889372	1.33361513060478e-24
Kctd8	-1.6202	2.24482981289764e-24
Aqp1	-1.96361	2.71298065745242e-24
Hist3h2ba	1.39082	7.04645428079645e-24
Cacnb4	1.00498	2.61621779156177e-23
Fndc3c1	2.13618	4.2985900237114e-23
Fbn2	-0.568961	4.32927293036577e-23
2310022B05Rik	-0.82823	5.84245980742565e-23
Cobll1	1.44367	7.13584446967155e-23
Ptgs2os2	-3.51406	7.87829837613869e-23
Adgrg6	-2.05409	1.22577596340271e-22
Gm45187	-2.67864	1.38034472575645e-22
Zfp469	-1.06411	1.38034472575645e-22
Prex2	-0.863127	1.53993224211303e-22
Il18	-2.03549	1.55176510845818e-22
Gsc	1.88549	1.59331403404874e-22
Kit	1.53696	1.69084543819525e-22
Axin2	-1.44375	1.83518009365273e-22
Edil3	-1.48787	2.2180754699895e-22
Atf7ip2	-1.9649	2.6337956384314e-22
Emcn	2.61882	2.97582329612321e-22
Vav3	-1.17859	3.66288491267736e-22
Pcdh10	-1.4184	7.1177898133058e-22
2700069I18Rik	-1.54549	7.78858875274672e-22
Lhx8	1.55595	8.25668102321336e-22
Tnrc6a	0.504107	1.60203288713949e-21
Rab3c	-2.22037	1.73636785616708e-21
Kcnh1	1.94955	1.97120137195639e-21
Irx2	-1.91302	2.49197001675313e-21
Radil	-1.13793	2.76060515480436e-21
Pdlim3	2.10653	3.91642254683377e-21
Wnt2	-2.0789	4.53004662218635e-21
Ptprj	0.69661	6.75102196233333e-21
Gm8773	-3.85622	8.19755381124817e-21
Syne4	1.20351	8.42481357432586e-21
Gm40383	-3.16968	1.22226912924416e-20
Zfp804b	-1.57917	1.4904858783458e-20
S100a4	-2.40322	1.51385264607847e-20
Lrrc15	-2.75689	1.76709187693858e-20
Nalcn	-2.14655	2.14002813948156e-20
Fkbp9	-0.596935	2.19277638572056e-20
Epyc	-2.28966	2.62132843584223e-20
Ass1	-2.76012	3.71923890850056e-20
Foxd1	0.773001	4.1633889670049e-20
Bgn	-1.10357	4.34076927048449e-20
Ghr	-0.629331	4.34076927048449e-20
Arap1	-1.18073	4.54426261850095e-20
Prrx2	-0.804172	4.80421326625314e-20
Zpld1	-5.61169	5.8471235835863e-20
Foxd2os	1.63769	6.79910900466759e-20
Plb1	-2.84132	9.64998743611826e-20
Ptx3	-1.21106	9.9263869217688e-20
Gm48742	-1.4492	1.09603796087022e-19
Calm3	-0.632983	1.09603796087022e-19
Gsta4	0.885369	1.234665574199e-19
Lama2	-1.19683	1.57971607800225e-19
Pcdh19	-1.3113	1.78825805244654e-19
Hebp2	-1.24246	1.91512034840668e-19
Aff2	0.66271	2.40210709418538e-19
Tpst1	-0.64758	2.40210709418538e-19
Sorcs2	-0.697185	3.17674392899432e-19
Grin2a	1.59618	3.28285229748243e-19
Rprm	-1.86145	3.84743106370317e-19
Pthlh	2.65518	3.92230245067757e-19
Atoh8	-1.36257	4.52281817514118e-19
Trpc3	1.3623	4.52281817514118e-19
Xpr1	1.0674	4.66855016685188e-19
Sema3d	-1.80837	5.24252261935132e-19
Fli1	0.655796	5.81800043868263e-19
Tox3	1.05163	6.79803848360049e-19
Marveld1	-0.763567	7.75162035988019e-19
Acss3	-1.30408	7.75162035988019e-19
Itga11	-1.57888	7.77714521697564e-19
Tubb2b	-1.25589	8.4371074683991e-19
Rasl11a	2.53903	1.09500423961202e-18
Daam1	0.731751	1.55757880895292e-18
Osr2	-1.05446	1.76447091089455e-18
Rcn1	-0.81969	3.15257582640823e-18
6720468P15Rik	-2.31337	3.17747801354747e-18
Olfml2a	-1.61929	3.34495752259538e-18
B230334C09Rik	-1.89637	4.56503792555387e-18
Ggh	-0.871979	4.68712259461234e-18
Calb1	-3.10791	5.30915689480937e-18
Map3k1	0.85365	5.73727766806723e-18
a	-1.43783	5.83480844700261e-18
Vamp5	-1.82249	6.01685718897564e-18
Ift57	0.862987	7.04253667948691e-18
Fzd10	-2.76749	7.13419930793117e-18
Rbm47	1.20172	7.13980185142626e-18
Farp2	-0.556448	7.49827205906037e-18
Agbl3	-1.33617	7.57102971873203e-18
Cd34	-1.6138	7.59943241953334e-18
Dlx2	1.53248	8.73439727370263e-18
Magel2	2.07752	9.4095215101062e-18
Cobl	1.52064	9.55979041905457e-18
Lvrn	-1.69228	1.00374827930381e-17
Nr5a2	4.35897	1.25785893407123e-17
Myl6	-0.686943	1.45984961549091e-17
Ifitm1	-1.3683	1.47542831743472e-17
Ppic	-0.823773	1.52087630786236e-17
Grn	-0.706168	1.66010720744187e-17
Sp5	-4.45816	1.91616356251574e-17
Cnmd	-1.43936	2.1741290242348e-17
Dyrk2	0.614845	3.42903560145933e-17
Dlx6	1.86273	3.97226855012061e-17
Crispld2	-1.57051	4.49792613237621e-17
Chka	0.557264	4.64194771490495e-17
Lama1	-1.34415	4.77685819587005e-17
Whrn	1.22967	5.85301843263716e-17
Ntrk2	0.91844	5.93164411600153e-17
Gab2	0.866946	6.14876337106181e-17
Car14	1.56216	8.63576091890284e-17
Wnt11	-0.774378	8.75957518009115e-17
Hdac9	-1.20341	9.51098138226318e-17
Dnah11	-1.93579	1.17514921480626e-16
Abcg2	0.566511	1.41528324504116e-16
Mtus2	1.12303	1.50070508125961e-16
Myh8	-5.43476	1.67448723254046e-16
Rasa3	0.903815	1.81057840779874e-16
Zfp185	-0.927916	2.31406605948546e-16
Tmem196	1.35717	2.64193243476799e-16
Ctsk	-0.994097	2.89936233177419e-16
Tex15	-0.981739	3.65154814023561e-16
Gm47507	-1.76767	3.76285610825104e-16
Ppp1r9a	0.883543	3.87283284160222e-16
Dgkd	0.558243	4.53334554665468e-16
Sytl5	1.56594	4.77482004762551e-16
Gm16599	0.819628	5.40898478645267e-16
Rap2b	-0.701936	5.55316493471728e-16
Unc13b	-1.0862	6.18523129630013e-16
Numb	0.494805	6.26511164805471e-16
Fam174b	-1.74744	6.43347132624018e-16
Kcnn2	-1.72195	6.86115505917723e-16
Col12a1	-1.26815	7.26867461792389e-16
Dnajc15	-0.650669	7.33244916087654e-16
Lrrtm1	-1.97137	7.67304100625521e-16
Glod4	-0.588898	7.88537866356547e-16
Cadm4	1.00521	8.27537331435604e-16
Emx2os	-2.21212	8.79130645344821e-16
Galnt13	-1.41706	1.06410013558151e-15
Sox5	-1.2003	1.1624569471011e-15
Adgre5	-1.04924	1.26154290638682e-15
Maoa	-0.816935	1.39409267096478e-15
Ckap4	-0.483956	1.39491003231814e-15
Gm536	-1.93758	1.47740242998172e-15
Gm28055	-1.15956	1.75505778823243e-15
Crnde	-1.85759	1.77437520317974e-15
Irs1	0.582669	1.77437520317974e-15
Lhfpl1	2.48074	1.84323403472268e-15
Slc25a4	-0.442848	1.86444592284925e-15
Pgam1	-0.665564	1.8701170592154e-15
Eya2	1.17227	1.91002081578742e-15
Rnf180	0.847752	1.94606463534005e-15
Rspo2	1.67039	2.18299314991099e-15
Creb3l2	0.462382	2.18299314991099e-15
Gm35330	-4.58338	2.21306638315465e-15
Kif21a	0.758376	2.22385371799068e-15
Pde4a	-1.33079	2.38980966394592e-15
C9	-2.03917	2.46618637729797e-15
Xpnpep2	-1.90044	2.63000419563035e-15
Prcp	-1.12873	2.85244990926666e-15
Tcf24	3.08882	3.01434487813855e-15
Rgs2	1.23037	3.65154555910707e-15
P4hb	-0.349149	3.87359469640118e-15
Dpep1	-2.73851	4.13061909194841e-15
Gadd45b	-0.878149	4.16716147982667e-15
Grik3	-2.07049	5.24375247910905e-15
8030451A03Rik	1.07918	5.26350303709356e-15
Chst12	-1.1406	5.87960698675665e-15
Txn1	-0.507849	6.4427969956992e-15
Lgals1	-1.03607	6.48537874304858e-15
Dpyd	0.706272	6.53988442839784e-15
Cited1	2.36995	6.86657024739993e-15
Slc35f3	2.16004	9.08216927826163e-15
Col6a2	-0.832377	9.40818861622119e-15
Nppc	-1.57149	1.05895475506301e-14
Nfib	0.440986	1.08498345262296e-14
Txndc5	-0.477734	1.13224752786261e-14
Tsc22d1	0.435295	1.42348252865733e-14
Tpbg	-1.11627	1.50269705217636e-14
Gm49767	-3.70465	1.51971792433803e-14
Tgfbi	0.814598	1.58855299062492e-14
Cecr2	1.30262	1.7047489001313e-14
Mpp6	0.529817	1.83227816503142e-14
Fendrr	2.52792	1.96691816198918e-14
Sorcs1	2.00735	1.9771629827296e-14
Gap43	-1.47073	2.12079016287246e-14
Dnah8	-1.18599	2.14543738270352e-14
Frat2	1.02638	2.17366837729159e-14
Eva1b	-0.6782	2.91138167758237e-14
Dpp4	-1.97086	2.91688019302799e-14
Malt1	1.29092	3.27986212331162e-14
Cdh7	-2.60429	3.32245238450446e-14
Emid1	-1.32765	3.73204826410353e-14
Eid1	-0.320212	4.36038190948157e-14
Nradd	-0.969295	4.38820235654431e-14
Fkbp1a	-0.615557	4.81379956550345e-14
Stk26	1.76077	4.94275990334052e-14
Cnnm1	-1.4968	5.06710188452703e-14
Dync1i1	-1.60503	5.10762806978979e-14
Tbcel	0.505222	6.16310598039913e-14
Plxna4	-1.02806	6.83735439964164e-14
Dtx3	0.537895	6.83735439964164e-14
Rnase4	-0.923666	6.84578403531093e-14
Olfml2b	-1.23089	6.91121362876529e-14
Tmem200a	-0.755771	7.0661404606364e-14
Myoz3	-1.44019	7.30444920830324e-14
Kcnk2	-1.21957	1.07872926714978e-13
Dpt	-2.74076	1.10314918642941e-13
Socs3	0.997093	1.10332470712989e-13
Tbc1d9	1.07973	1.10464489430028e-13
Slc16a7	-0.880514	1.13765437415436e-13
Otud7b	0.515208	1.15673655626358e-13
C1qtnf2	-1.6575	1.18177425510579e-13
Dgkb	2.01008	1.27689175834666e-13
Adgra3	0.753678	1.32231667435608e-13
Kctd10	-0.787479	1.6848935795911e-13
Slc27a3	-1.11794	1.84908996895872e-13
Nkd2	-1.14991	1.85194975688328e-13
Fap	1.03273	2.11265208136652e-13
Sh3bgrl3	-0.711259	2.25660736384645e-13
Dchs2	1.1809	2.47541770876798e-13
Cux1	0.513862	2.48111959959414e-13
Cyb5r3	-0.551573	2.91995546869295e-13
Emc10	-0.539571	2.97772902175804e-13
Cdo1	-1.12999	3.32346485266541e-13
1700024B18Rik	-2.88614	3.59554349710916e-13
Manea	0.619984	3.73402493731772e-13
Asph	-0.747156	4.01177070927409e-13
Sspn	-1.20272	4.12785180747041e-13
Plcl2	1.0273	4.64979946148321e-13
Mmp14	-0.562654	4.77961797301857e-13
Ppm1e	1.11564	4.96123772377252e-13
Cdc42ep5	-0.559934	5.05695568916784e-13
Rab5a	0.315828	5.18237557239716e-13
Camta1	0.467544	5.6611349890305e-13
Psme4	0.320368	5.96620841679486e-13
Ypel3	0.515061	6.19540222817699e-13
Lin7a	-1.46172	8.63705063126297e-13
Rcn3	-0.648769	1.1057771644086e-12
Gsn	-0.454085	1.13747616828915e-12
Tcf15	2.47465	1.16265297701686e-12
Iqcb1	0.430756	1.16362582621883e-12
Nupr1	-1.41288	1.28914726918022e-12
Wee1	0.685906	1.31386722885985e-12
Mecomos	1.95473	1.48417283245832e-12
Rcan2	-1.17139	1.57811970729948e-12
Gm15336	1.33927	1.64000804350779e-12
Pygb	-0.652936	1.64000804350779e-12
Erich2	-1.88023	1.72719056522855e-12
Ttyh3	-0.661502	1.74419298090242e-12
Chpt1	-0.467276	1.85210479155597e-12
Foxd2	1.79143	1.86379736765035e-12
Gm10860	3.42751	1.89328197717182e-12
Necab1	-1.40073	1.91024013883224e-12
Cdh13	0.879157	2.02794565703098e-12
Arhgap28	-0.659324	2.30479693032842e-12
Klf14	1.4093	2.37221911925882e-12
Prelid1	-0.599644	2.55011076066176e-12
Angptl1	1.16368	2.61211100812395e-12
Col3a1	-0.805759	2.69978116807735e-12
Timp3	0.575396	2.80208174461119e-12
Slc16a12	-2.06815	2.84199464883002e-12
Knstrn	-1.08306	3.15726426437893e-12
Stk38l	0.640813	3.29088367656666e-12
Smg7	0.533126	3.43486354588809e-12
Inhbb	-1.87737	3.79543208554462e-12
Igfbp3	1.13391	3.93586997988925e-12
Sfrp1	0.637941	3.93586997988925e-12
C630043F03Rik	0.896666	3.99046622901741e-12
Calm1	-0.508431	4.03452922924372e-12
Vat1l	1.71802	4.29553013182022e-12
E330013P04Rik	-1.32512	4.71258730882503e-12
Phlda1	1.67621	4.72340113006062e-12
Apela	-1.7521	4.91564480673585e-12
Spr	-0.678638	4.91564480673585e-12
Ngf	-1.17687	5.0710815972283e-12
Agrn	-0.668629	5.09336492207143e-12
Pdlim1	0.919948	5.31021283070226e-12
Ehd2	-0.771933	5.31303845466174e-12
Usp53	0.945457	5.36635173691672e-12
Gm5089	-1.20637	5.62920791819675e-12
Scd1	-1.02821	5.91909152494717e-12
Prxl2c	0.777623	6.17061028867313e-12
Hs3st5	-1.31789	6.4244846199211e-12
Upf3b	-0.566348	7.02282230738046e-12
Dlx6os1	1.39886	7.30501112307642e-12
Lrrc32	-1.81918	7.68697038202309e-12
Eps8	0.823319	7.81632056733561e-12
Pdgfb	2.54345	8.00308972354453e-12
Zfp521	-0.731991	8.39353955582311e-12
Gm49678	-2.75716	8.46956454395355e-12
S100a6	-1.48709	8.78179176174215e-12
Vegfd	-1.93354	1.033979873885e-11
Lxn	-0.864065	1.08953284639834e-11
Fam114a1	-0.569564	1.22973950952531e-11
Gja1	-0.771739	1.25172817413148e-11
Ecscr	-2.04204	1.26887062093643e-11
Ldlrad3	0.453518	1.29430439126102e-11
Zic3	-2.46095	1.30863194394667e-11
Creb3l1	-0.95407	1.31070039847055e-11
Cald1	-0.416956	1.3262724313531e-11
C1galt1	0.801292	1.36457724028477e-11
Tmem26	-0.874833	1.39728224156449e-11
Gfpt2	0.846596	1.39817748451033e-11
Cpeb2	-0.854982	1.47446351276908e-11
Crip1	-1.94125	1.49953886971119e-11
Tnks2	0.291684	1.50551561781033e-11
Crmp1	-0.954832	1.52198046380474e-11
Ptk7	-0.472471	1.5534357549788e-11
4930469K13Rik	-3.34603	1.5534357549788e-11
Rasef	3.10019	1.59940680388442e-11
Ptch1	0.649391	1.6101790332547e-11
Dhrs3	1.55683	1.70102205547527e-11
Anxa3	-1.14987	1.99932682911542e-11
Sdc2	-0.872935	2.15274951414033e-11
Serping1	-0.717922	2.25847739713629e-11
Vat1	-0.811446	2.29939596697406e-11
Arhgef7	-0.53839	2.3530023414198e-11
Klf3	-0.698941	2.4948517319672e-11
Adamts20	-1.15425	2.5064305834864e-11
Wnk2	1.02489	2.56789879231194e-11
Slco1c1	-1.04861	2.61676335753938e-11
F3	1.36105	2.62480123135236e-11
Ostf1	-0.564669	2.75989522614767e-11
P3h2	0.50872	2.77197948148373e-11
Scx	0.939488	2.86185665056235e-11
Cryzl2	-1.87467	3.14989992077666e-11
Calr	-0.420753	3.66075142640651e-11
Enho	-0.824118	3.66651784401243e-11
Lax1	-0.997509	3.83832376983554e-11
Zdhhc12	-1.08692	3.86376203786226e-11
Ldha	-0.731308	4.42009799293432e-11
Zbtb16	-1.49226	4.64899485686131e-11
Rasa4	1.20051	4.97347823504225e-11
Trim16	-1.14918	5.04463861084217e-11
Arhgef6	-0.965139	5.15816436777656e-11
Atp8b5	-1.59001	5.4278788481197e-11
Nudt19	-0.815968	5.4278788481197e-11
Sema3a	-0.785239	5.91585292344509e-11
Tuba1a	-1.21672	6.07141451217274e-11
Csgalnact1	1.57528	6.0919301493985e-11
Gm20721	0.650258	6.42233849207718e-11
Hmcn1	-0.66414	6.70019584306275e-11
Gpcpd1	0.776466	6.7330684829205e-11
Aox1	-1.42424	8.12306243846238e-11
Dusp16	0.694043	8.24193583311022e-11
Spon1	-1.04109	8.33938728794e-11
Ftl1	-0.531421	8.64454488174813e-11
Spock1	2.0081	8.91573636761942e-11
Prdx6	-0.791385	9.01998332094894e-11
Atp5b	-0.369302	9.89360421030982e-11
Tox	-0.757239	9.89360421030982e-11
Ctsb	-0.509083	1.01432306489474e-10
Tmem246	-0.844699	1.0499716520664e-10
B4galt1	0.514783	1.0849762117505e-10
Tfpi	-0.789937	1.09796708642568e-10
Churc1	-0.79368	1.11650835049135e-10
Tacc1	0.644448	1.13179468741162e-10
9530026P05Rik	1.32132	1.17330482118036e-10
Col9a1	-1.80051	1.30040589101731e-10
Sec24a	0.513417	1.30490562974053e-10
Cdca3	-1.22539	1.48936081509656e-10
Galntl6	-1.87501	1.62044939271754e-10
Wsb1	0.461757	1.67809670583826e-10
Myl12a	-0.457338	1.69870014835514e-10
Sdc1	-0.478801	1.71319204286593e-10
Mest	0.587642	1.75504304148628e-10
Adamts7	-0.779942	1.86322399286423e-10
Slc45a2	-2.52715	1.87128742156187e-10
Avpi1	-0.94317	1.87371126757632e-10
Sh3rf3	-0.900555	1.90976796590173e-10
Vsnl1	-1.22173	2.06608149619776e-10
Adcy8	-1.46799	2.06721787402102e-10
Kcnip4	-1.97064	2.2109481099152e-10
Gm37240	0.481517	2.2109481099152e-10
Dcx	1.21487	2.22856829678819e-10
Fam57a	-0.979374	2.29186276326082e-10
Mrtfa	0.494077	2.34570458825971e-10
Esr2	1.3609	2.35689656135847e-10
Col16a1	-1.03542	2.58951125826068e-10
Nrgn	-2.21374	2.74483054136216e-10
Kctd1	0.973429	2.83172355370147e-10
Parp8	0.910394	2.8382217963445e-10
Ccna2	-1.40737	2.84481427828928e-10
Ntrk3	1.37148	2.89254834535107e-10
Itpk1	1.00928	2.89942107326474e-10
Hpca	2.00532	3.06313746795254e-10
Ier5	0.753363	3.10067417929245e-10
Cdh8	-1.63742	3.158165886791e-10
Megf6	-0.674572	3.21936232530378e-10
Smox	0.769314	3.43805045342617e-10
Mpv17l2	-0.980997	3.43805045342617e-10
Cspp1	0.356572	3.44734000246257e-10
Vcam1	-1.22821	3.44734000246257e-10
Yif1a	-0.542901	3.8833252033536e-10
Fat4	-0.55179	3.99554965683254e-10
Atp2a2	0.48985	4.02074725976524e-10
Prrt4	-1.88026	4.13069043050378e-10
Gxylt2	-0.832834	4.13495507614389e-10
Syndig1	-1.14136	4.29169519345414e-10
Hsp90b1	-0.436799	4.3140545958111e-10
Adh1	-2.67222	4.49973990441667e-10
Myo1b	-0.480095	4.6359951460247e-10
Tacc3	-1.24555	4.65167701591573e-10
Tgfb1i1	-1.02869	4.74166710222833e-10
Six4	0.768097	5.16381420500378e-10
Uchl1	-0.680881	5.79645365470281e-10
Plekhh1	1.38247	5.79645365470281e-10
Prelp	-2.32792	5.79764306628731e-10
Myl9	-0.878941	6.03195366410191e-10
Rmnd5a	0.31444	6.17123465095287e-10
Akr1b3	-0.588882	6.17864862316545e-10
Efr3b	0.700134	6.27093269642297e-10
Cep126	0.8127	6.29648626691273e-10
Rnf150	0.71929	6.4915374081578e-10
Abr	0.583467	6.57534331313864e-10
Lpin2	0.442328	6.82746025412036e-10
Cmtm8	1.19564	6.8998522497597e-10
Cdon	-0.544535	7.42503674179318e-10
Nnmt	-2.58567	7.61237076833867e-10
Ube2b	0.347744	7.62850639072835e-10
Fmod	-2.169	7.62850639072835e-10
Rras2	-1.14799	7.71824207509042e-10
Glo1	-0.443319	8.07552757370648e-10
Satb2	2.40415	8.08247290188132e-10
Hmgn3	-0.733225	8.3619601398903e-10
Swi5	-0.445858	8.73192795754785e-10
Col5a2	-0.654197	8.82953451486784e-10
Smco4	-0.608523	9.05391767998491e-10
Fstl1	-0.275976	9.32355041461144e-10
Gm34517	-1.68517	9.38666197144667e-10
Gpx1	-0.520276	9.40533881658356e-10
Slf2	0.470487	9.5722486949912e-10
Atp5g2	-0.603141	1.00900273153154e-09
Hey1	1.10267	1.02207701195663e-09
Ldhb	1.02968	1.02360861794213e-09
Cx3cr1	-0.766932	1.09654700333992e-09
Wnt6	-1.63794	1.12486447858379e-09
Pias2	0.370272	1.13131085491759e-09
Etv4	1.36025	1.13683076020126e-09
Sp4	0.755285	1.15436215095565e-09
Pex5l	-2.06702	1.15834094913856e-09
Gm11077	-1.54027	1.20957568592839e-09
Glt1d1	-2.16291	1.27263601336027e-09
Gnas	0.352035	1.27277276676073e-09
Reep5	-0.449717	1.29072845995321e-09
Gm37459	-1.43986	1.32820737679759e-09
Scarb1	-0.736151	1.35258759706337e-09
Pmepa1	-0.515509	1.39834555958827e-09
Mb21d2	0.618436	1.41797806253014e-09
Sh2d4b	-0.865153	1.42661568557885e-09
Iqgap2	0.786791	1.49668365594580e-09
Tgfbr3	-0.564283	1.5239902877552e-09
1110032F04Rik	-2.71903	1.54459381870932e-09
Nt5c	-0.618668	1.54997246090382e-09
Lgalsl	-0.646451	1.56462383154705e-09
Cbln4	-3.29532	1.65778798678423e-09
Ahnak	-0.639372	1.70698616667101e-09
Tspan7	1.00835	1.72397666481353e-09
Emp2	-0.942644	1.81461639259025e-09
Srek1	0.28237	1.81729860506763e-09
D16Ertd472e	0.610929	1.87241034032541e-09
Vwa2	-1.64854	1.88448827291604e-09
Actg2	-2.09315	1.88911361154858e-09
Lrrc75b	-2.53101	1.8954567083815e-09
Msantd2	0.346772	1.99630622913194e-09
Spp1	-1.69334	2.00854714213213e-09
Tnn	-1.72427	2.00988564059019e-09
Mapre3	0.702394	2.03858357776104e-09
Adamts2	-0.938351	2.07507326254399e-09
Cdh11	-0.747686	2.09018822670892e-09
Tom1l1	-0.71359	2.14663627502894e-09
Fam180a	-2.93703	2.17063338270411e-09
Pgk1	-0.434493	2.22792197758493e-09
Tek	-1.49242	2.2296777090648e-09
Ccnd1	-0.669878	2.25115766953421e-09
Plpp3	-0.490557	2.26421070432277e-09
3222401L13Rik	-1.31839	2.5315174215118e-09
Gm36033	-1.68541	2.54836086803184e-09
Klhl13	0.659555	2.65341501498145e-09
Ssr1	-0.436882	2.67286132254694e-09
Egfem1	1.63423	2.75604188220179e-09
Gm13052	0.881667	2.78581761199049e-09
Zfp711	0.660485	2.85326022331418e-09
Phactr2	1.17568	2.85573236721171e-09
Alcam	-1.1314	2.85573236721171e-09
Sh3pxd2a	-0.425155	2.91046145990866e-09
Gabarapl1	0.521605	2.98771976305262e-09
Fndc3b	-0.384987	3.06664576903949e-09
Dph3	0.374523	3.08035317894996e-09
1700018A04Rik	1.49275	3.1976582284413e-09
Hand1	3.37891	3.2548774910884e-09
Tango2	-0.685789	3.39631645425589e-09
Smap1	-0.295834	3.41087937370753e-09
4930447K03Rik	-1.07518	3.58562068466465e-09
E130308A19Rik	0.620718	3.58711417157406e-09
Rtl5	1.27046	3.58711417157406e-09
Nfxl1	0.606263	3.70545166737e-09
Crispld1	-0.83453	3.74127592004777e-09
Gm46323	-2.72119	3.80717732049403e-09
Sp1	0.369613	3.81808144567932e-09
Mmrn2	-0.690668	3.88973053360622e-09
Nrxn3	-0.907332	3.93464533681270e-09
Gm35024	-5.16417	3.98539200644766e-09
Etv1	0.818239	3.9971181683243e-09
Sned1	1.17441	3.9971181683243e-09
Ptpn1	0.551188	4.08777442269784e-09
Dbi	-0.641153	4.20468493269966e-09
Nexmif	1.52841	4.29122767999117e-09
Il17d	-0.693285	4.3588192120735e-09
Mbd2	0.45434	4.40995037544622e-09
Pcsk9	-1.81081	4.40995037544622e-09
Lhx6	1.43282	4.46626956265644e-09
Egfr	1.24732	4.48722028352243e-09
Prlr	2.37315	4.49875797731739e-09
Selenon	-0.563393	4.66360652912735e-09
Ralgapa2	0.503354	4.67000712277037e-09
Pnisr	0.319502	4.73744778559993e-09
Tle2	0.699336	4.80319539363644e-09
Ralyl	-1.25513	4.82159377837083e-09
Ldb2	0.56835	4.82609049637546e-09
Shisal2a	2.62342	4.87956495162372e-09
Gm10635	-2.57945	5.06520975278855e-09
Gm26839	-1.25055	5.20560376123591e-09
Setx	0.463504	5.21617237607783e-09
Ttc19	0.35488	5.39672079660499e-09
Phactr1	1.09349	5.54360885190181e-09
Ankrd26	-0.491578	5.58330597943507e-09
Epcam	1.31104	5.59833114753126e-09
Dennd2a	0.528877	5.60955867871289e-09
Gm33497	-1.68324	5.7437820023428e-09
Etv6	0.443298	5.90949281661831e-09
Rac3	-0.658008	5.95945248896105e-09
Gm10578	1.52401	6.090811753427e-09
Pcdh17	0.972366	6.14358597688127e-09
Pnp	-0.691167	6.22216340263461e-09
Mid1	0.530461	6.26383755482839e-09
Gamt	-0.672097	6.30148727967852e-09
Pou3f3	-1.54536	6.41713068859516e-09
Fibin	-0.517244	6.60268232518411e-09
Slc25a27	0.502533	6.74816710695549e-09
Cpa6	-2.94233	6.74816710695549e-09
2310014F06Rik	-0.963381	7.08037263241071e-09
Cenpv	-0.603307	7.23797382337649e-09
Cp	-2.02549	7.30979755420876e-09
Tbc1d2b	-0.743871	7.30979755420876e-09
Gipc1	-0.475784	7.39049164098426e-09
Lamp1	-0.471829	7.70101187676672e-09
Foxf1	2.22459	7.8083035499799e-09
Bok	-1.45174	7.85327002422752e-09
Hs6st2	1.17049	7.9444276849278e-09
Pla2r1	-1.77027	8.2506123469965e-09
Tspan11	-0.758894	8.56034723201413e-09
Trib1	1.65162	8.5719617165407e-09
Zic5	-2.24053	8.92920114697585e-09
AI506816	-0.516206	9.17713805389281e-09
Msra	-0.675503	9.17713805389281e-09
Tmsb10	-1.13561	9.17713805389281e-09
Egfros	1.4526	9.49500445142813e-09
Crym	1.64378	9.49603301771487e-09
Gm10000	2.13779	9.49603301771487e-09
Scaper	0.48126	1.00933826108404e-08
Clk4	0.385629	1.02961994051332e-08
Rora	0.457169	1.08088415693585e-08
Birc5	-1.08128	1.08633650061669e-08
Pten	-0.352313	1.08904162851421e-08
Mir100hg	-0.710572	1.09304840598232e-08
Thra	-0.391955	1.10909687880175e-08
Hipk1	0.462245	1.14415453344177e-08
Npy1r	-1.85914	1.14415453344177e-08
Insrr	2.00016	1.14642041209262e-08
Hs6st1	0.57799	1.1523826279807e-08
Syne2	0.75978	1.16460587917289e-08
Ehd1	-0.439063	1.2279750239125e-08
Slc7a6	0.5105	1.27158466691787e-08
Sulf2	-0.380843	1.29968642761459e-08
Ampd1	-0.674288	1.3118635809026e-08
Colgalt1	-0.38442	1.35495230595742e-08
Sec16b	-1.39379	1.35885601826569e-08
Tank	0.435181	1.40958127776923e-08
Hcfc1r1	-0.490666	1.4124692807087e-08
Tpm4	-0.397328	1.41590351734666e-08
Ppp1r14b	-0.649941	1.42346827616841e-08
Gdf5	2.31019	1.44643228168405e-08
Apex2	0.363366	1.46938547192842e-08
Ppp2r2b	1.17296	1.65635697114712e-08
Spats2l	-0.492921	1.65784556360372e-08
Tmem132b	-1.13577	1.6736193794154e-08
Adgrd1	-2.42735	1.69177735910164e-08
Ly6h	1.2361	1.6981848199366e-08
Nrip1	0.532951	1.72331564895796e-08
Anln	-1.31422	1.72642618425613e-08
Sox6	-1.10948	1.73412256229828e-08
Irx3os	-2.35444	1.82100966849184e-08
Mak	1.72193	1.86340182453132e-08
Rgs22	-0.997644	1.89842253578532e-08
Cdc42ep2	-1.36851	1.99501362111984e-08
Magi2	-0.628766	2.03398383690284e-08
Tubb5	-0.687378	2.04078804678555e-08
6330403K07Rik	0.395521	2.13539140230716e-08
Mtx2	-0.392166	2.31184043438257e-08
Anks1	0.495583	2.31732761307192e-08
Zfp947	1.21619	2.42891579168982e-08
Birc3	-0.67836	2.49446729160084e-08
Cenpb	-0.624891	2.49979041865829e-08
Plod3	-0.517721	2.50799490251686e-08
Nfam1	-2.27495	2.55578214899018e-08
Bicd1	0.944904	2.55897181701509e-08
Eif1ax	-0.445331	2.65942719674219e-08
Kif11	-1.1269	2.67822925770275e-08
Gm4258	0.430575	2.74093943083088e-08
Slc16a3	-1.33173	2.74093943083088e-08
Plpp4	1.82463	2.80491565294538e-08
Hpcal4	3.06238	2.93087727760849e-08
Mctp2	1.35775	2.93639806445526e-08
Kcnmb4	-0.687059	2.93748313848388e-08
Desi2	0.415966	3.03967610213172e-08
Plin3	-0.406824	3.06957548642397e-08
Lsamp	-0.631791	3.19870020105115e-08
Mea1	-0.604231	3.36267182114036e-08
Tubb4a	1.17004	3.40451775613594e-08
Hsd17b10	-0.436575	3.40451775613594e-08
Coch	-1.02504	3.41392451121109e-08
Gatad2b	0.340914	3.49059879404656e-08
Actb	-0.62035	3.49757519099648e-08
Lefty1	-1.66084	3.49871418364633e-08
Map2k4	0.297529	3.55034635498665e-08
Galk1	-0.522522	3.60142915357395e-08
Egfl7	0.837716	3.63198431021712e-08
Slc4a7	0.632751	3.64849765548614e-08
Nbl1	-0.664422	3.64849765548614e-08
Galnt14	1.07584	3.66220142889637e-08
Dkk1	-2.02924	3.6817855204339e-08
Ybx1	-0.456018	3.71696115805395e-08
Tmem123	-0.50755	3.71950273926921e-08
Fam118a	0.586558	3.77893839144242e-08
Zfhx4	-0.866812	3.95455537342648e-08
Pgrmc1	-0.393813	4.03594931922073e-08
Myorg	-1.82562	4.03963824166758e-08
Ahnak2	-1.53624	4.03963824166758e-08
Capzb	-0.380979	4.03963824166758e-08
Fzd9	-2.07181	4.07023691200247e-08
Ddost	-0.597137	4.07664678341823e-08
Ogdh	0.372934	4.08505792350189e-08
Anxa5	-0.554687	4.11778313328358e-08
Stx16	-0.372388	4.18845426407085e-08
Trac	-2.20804	4.31798946050128e-08
Lsmem1	-0.980103	4.32409206897648e-08
Parvb	1.3595	4.33601841917686e-08
Adamts6	-0.701621	4.40671249376773e-08
Yes1	0.361743	4.45723505131752e-08
Lpar6	0.785297	4.48168330735256e-08
Ern1	0.486124	4.52645948335033e-08
Cyp27a1	-1.13125	4.63979495829603e-08
Stx6	0.459114	4.65437903987411e-08
Cry1	0.454453	4.75053525190782e-08
Tmprss7	-1.1053	4.9446695874459e-08
Nme2	-0.525822	5.05104892613704e-08
Top1	0.310005	5.10922373522958e-08
AI314278	1.96049	5.22016271975995e-08
Pkm	-0.581394	5.2886967256938e-08
Map3k5	1.25151	5.33872119174123e-08
Slc25a1	-0.842588	5.48353970904898e-08
Sec61a2	0.348039	5.77198220343118e-08
Rarb	0.833172	5.77498667224004e-08
Wdhd1	0.640584	5.80481010008895e-08
Gm20554	-2.59184	5.82260054916376e-08
Snai2	-0.489066	5.95359850605862e-08
Asap1	0.331536	6.21231078609959e-08
Id2	-0.810963	6.23635260800339e-08
Apobec3	1.5629	6.55613818204166e-08
Arih2	0.316846	6.68800775757206e-08
Plce1	1.1969	6.75484731986069e-08
Kazn	0.613075	6.83124847617562e-08
Ccnl2	0.294073	6.93421387060174e-08
Cbln2	-1.20446	6.93443578675366e-08
Mrpl33	-0.467912	7.32056397589963e-08
Pde4b	0.510401	7.36054103835215e-08
Cx3cl1	1.6498	7.69018361966227e-08
Klf4	-0.560476	7.71984619663328e-08
Prdx4	-0.510058	7.96005948158099e-08
Adamtsl5	-2.08978	8.04310048225044e-08
Kctd16	1.46274	8.10267585872694e-08
Trpm3	1.40845	8.50209703162943e-08
Gm34184	-2.53142	8.66007575345984e-08
Pimreg	-1.95612	8.66007575345984e-08
Agpat4	0.502693	8.69954348098554e-08
Ncald	0.563993	8.81910505663963e-08
Cdhr4	0.893652	9.28087370492566e-08
Brinp1	-1.16332	9.28087370492566e-08
Cenpf	-1.1426	9.32878208474834e-08
Slc24a2	-1.84045	9.43657611440392e-08
Virma	0.276873	9.75744603809835e-08
Itga8	-0.845043	9.78342831934903e-08
Fxyd7	1.1939	9.97992550484539e-08
Adarb2	2.0357	1.00989002945022e-07
Slc48a1	-0.888555	1.01359067983793e-07
Tram2	-0.659546	1.04627853784767e-07
Oxct1	-0.363868	1.0570357778726e-07
Gm5089.1	-2.32033	1.10394474321336e-07
Tex2	0.528265	1.130523314321e-07
Wdfy2	0.453902	1.14700214721794e-07
Spon2	-1.18034	1.17500695627097e-07
Gpr88	-2.25818	1.2034092732609e-07
Bckdk	-0.80965	1.20686269588462e-07
Gm10837	-3.16762	1.20752575673799e-07
Aldh1a2	2.78569	1.22220418064981e-07
Ubr1	0.448404	1.2430640587249e-07
Akirin1	0.39913	1.25799573880359e-07
B3gnt9	-1.16737	1.29466558737299e-07
Eif2ak2	-0.578632	1.31407696208186e-07
Nt5dc3	1.03048	1.33473869138273e-07
Sesn1	0.461727	1.35362599347908e-07
Gm16201	0.779658	1.37917219423212e-07
Igdcc4	-0.433174	1.38098413587664e-07
Glt8d2	-0.696864	1.42303853585854e-07
Cdk17	0.365649	1.46426460336089e-07
Krt18	2.32321	1.46426460336089e-07
Rasa2	0.274771	1.47694517751027e-07
Plagl1	1.16005	1.52250165303029e-07
Xkr4	-0.537682	1.54857870185268e-07
Acan	-1.65017	1.56401905411791e-07
Gm46606	3.22843	1.60875061005463e-07
Rnf115	0.388298	1.62152827957145e-07
Parva	-0.347268	1.62772780535938e-07
S100a11	-0.766315	1.65539615249285e-07
Arpc3	-0.39705	1.74118097760379e-07
Hgf	1.52209	1.75988351975387e-07
Glis1	-1.18586	1.77307781831448e-07
Khdc4	0.385888	1.78868800090328e-07
Atp11b	0.469756	1.78868800090328e-07
Gas2	1.25751	1.79137497408767e-07
Irf8	1.65813	1.82794459727341e-07
Dst	0.450261	1.84208234372179e-07
Larp4	0.295945	1.85890025111367e-07
Hivep2	0.563385	1.89456471547983e-07
St3gal6	0.571127	1.89862827269859e-07
Pantr2	-1.69948	1.89862827269859e-07
Antxr2	-0.451836	1.90368592853015e-07
Irak1bp1	0.45428	1.91212385346653e-07
Clcn5	0.735209	1.91534035873467e-07
Ahcyl1	0.384274	1.94545614890425e-07
Has2	1.22399	1.95435542696953e-07
Acsl3	0.438773	1.95680993060159e-07
Ccdc6	0.572365	1.97813051750194e-07
Ttc21a	-1.01281	1.97813051750194e-07
Gm42303	-1.17236	2.0558993280836e-07
Hapln1	-1.62854	2.08167972225009e-07
Eno1	-0.903735	2.17446391037432e-07
Basp1	-0.758799	2.27538062260105e-07
Jam3	-0.406039	2.27739003576796e-07
Tubb4b	-0.716614	2.32439971529415e-07
Gpm6b	1.06831	2.32439971529415e-07
Scyl2	0.439091	2.48679956015223e-07
Marcks	-0.644761	2.53114246242268e-07
Phex	1.25335	2.54595856239399e-07
Ncam2	-1.27699	2.61587705989212e-07
Elf2	0.373146	2.71534401701852e-07
Peg10	1.22457	2.71534401701852e-07
Cenpe	-0.96123	2.72806496693775e-07
Pdxdc1	0.381055	2.76417223748376e-07
Dab1	-0.444438	2.76417223748376e-07
Spred2	0.531167	2.77788560715299e-07
Hey2	-1.28461	3.05779998662627e-07
Kif4	-1.29406	3.0923386848291e-07
Tiam2	0.971038	3.20111765383423e-07
A730046J19Rik	1.80827	3.21817689314364e-07
Scube1	1.1362	3.23623481631427e-07
Ppib	-0.338547	3.30089300490757e-07
Znrf2	0.531066	3.30313727939764e-07
Gm31641	-1.42432	3.34540504411811e-07
Ogfod3	0.677967	3.38493123087872e-07
Acbd3	0.2803	3.3905638859736e-07
Ntn4	-1.33245	3.42741404119257e-07
Vps13b	-0.451946	3.51151379410921e-07
Nktr	0.265616	3.52453211874263e-07
Sult5a1	0.750687	3.5900678870228e-07
Emx2	-1.39895	3.64038252052206e-07
Ebpl	-0.413759	3.64038252052206e-07
Atp13a3	0.433223	3.718446375803e-07
Gm13684	0.599747	3.72960434197746e-07
Vps8	-0.610923	3.83735727818031e-07
Bak1	-0.57151	3.87020994349575e-07
Slc37a3	0.438084	3.94436182100689e-07
Mme	-0.666399	4.00533380590268e-07
Stk24	0.376807	4.00533380590268e-07
St6gal2	-1.59765	4.03580388554315e-07
Snap25	-1.15676	4.14914989916207e-07
A830012C17Rik	1.80882	4.15651428719534e-07
Pappa2	-2.77897	4.2293784419913e-07
Col11a1	-0.904803	4.2293784419913e-07
Zfhx2	0.747302	4.33415042925109e-07
Gprasp2	0.447706	4.33855740557847e-07
Pdia6	-0.518902	4.4938003581433e-07
Hsd17b12	0.319869	4.4938003581433e-07
Trpc5os	4.52827	4.53371933627607e-07
Frrs1l	-0.66712	4.57004709306129e-07
9330182L06Rik	0.695226	4.59782406893362e-07
Tspan5	-0.650768	4.71579893845587e-07
Pdzrn3	-0.279989	4.72800233632079e-07
Psap	-0.424364	4.72800233632079e-07
Bub1	-1.3906	4.84519634058291e-07
Sec61b	-0.438696	4.90599896000091e-07
Dtna	0.428924	4.97739557554243e-07
6030407O03Rik	-0.88929	5.02028174995647e-07
Jpt1	-0.769853	5.02622093202068e-07
Mboat2	0.643278	5.08239887476608e-07
Masp1	-1.70697	5.16191849509205e-07
1700061N14Rik	-1.03469	5.18524966208724e-07
2810404M03Rik	-1.96014	5.19485981914243e-07
Gm37768	0.526674	5.21645656412112e-07
Pik3r5	1.27546	5.31984666558659e-07
Ran	-0.484594	5.38353427251746e-07
Rlim	0.314512	5.39093489902005e-07
Adarb1	0.710186	5.43904240880674e-07
Stra6	-1.52475	5.4914795976235e-07
Lzts1	1.02085	5.59060340727711e-07
Lactb2	-0.773569	5.98355213508083e-07
Gm10941	1.02647	6.18851974793357e-07
Tbx2	0.917696	6.27299668012181e-07
Fam129a	1.28395	6.45606665140893e-07
Kifap3	-0.48921	6.57480004262991e-07
Arfgef3	0.604739	6.73656155535233e-07
Fbxo7	0.607009	6.73656155535233e-07
Aga	-0.573793	6.86755937926221e-07
Akap11	0.361403	6.9781286210156e-07
Pmm1	-0.514311	7.19781327427128e-07
Lpl	1.73453	7.24521195247425e-07
Ubxn11	0.71062	7.38318647891057e-07
Nab2	0.709099	7.3885009013868e-07
D5Ertd579e	0.502555	7.49373587496109e-07
Pigk	-0.593725	7.49373587496109e-07
Gm47027	0.890881	7.91577345775892e-07
Zfp395	0.462725	8.22932630119768e-07
Usp37	0.303409	8.26001427932846e-07
Adamts4	-0.958563	8.29266177052516e-07
Epb41	0.453332	8.5158503241918e-07
Pianp	1.51649	8.67151859133398e-07
Gm40841	-0.854962	8.67540623733674e-07
Slc25a36	0.475807	8.68169357903901e-07
Aak1	0.40046	8.88899682890959e-07
Tpgs2	-0.604679	8.95645278621441e-07
Ppp1r15a	0.881522	9.00624407218443e-07
C530008M17Rik	-0.551821	9.09695229151822e-07
Gpr137c	0.692378	9.12066774400432e-07
Tada2a	0.320677	9.22022038518979e-07
Bsdc1	0.454332	9.43580266254944e-07
Fam13b	0.284083	9.6377964676427e-07
Oaf	-0.519541	9.76108957607816e-07
Grb10	0.35849	9.79818281140359e-07
Scube2	-0.873528	9.88641665466552e-07
Lgi2	1.341	1.00150413343777e-06
Tle1	0.398699	1.0112157249182e-06
Cdkl4	-0.764805	1.02350815215315e-06
Ooep	-1.56495	1.03010344999283e-06
Col13a1	0.5739	1.05432796077618e-06
Rdh10	0.598966	1.05432796077618e-06
Trmt9b	0.871862	1.05763938680648e-06
Fmo2	-1.92279	1.06730486403169e-06
Klhl15	0.51417	1.07679163642693e-06
Prkg2	0.855903	1.09708875100954e-06
Coa5	-0.570437	1.13470141584573e-06
Cdca8	-1.0334	1.13804050594572e-06
Emp3	-0.791934	1.14338715031814e-06
Ccdc152	-0.73605	1.15429963621013e-06
3010001F23Rik	0.541319	1.18436958430264e-06
Hsph1	0.718979	1.18560174845567e-06
Cul9	-0.49884	1.20225296320039e-06
Shcbp1	-0.980381	1.22588001913755e-06
Plod2	0.6823	1.22645386450945e-06
Haus8	-0.552249	1.2391313298903e-06
Fads3	-0.839997	1.2391313298903e-06
Tiam1	0.500965	1.25804546857641e-06
St6galnac5	-1.6424	1.26180119027152e-06
Gm37229	1.03201	1.27583962837046e-06
Opcml	0.772582	1.29008605697179e-06
E2f3	0.323621	1.29828580816579e-06
0610043K17Rik	0.756687	1.31097966415327e-06
Sept7	-0.215622	1.31243816725967e-06
Fgf1	0.768394	1.32545631364231e-06
Rnmt	0.360005	1.32927536974139e-06
Thy1	-1.91005	1.33348267517962e-06
Adgra2	-0.942015	1.33891446861482e-06
Stxbp6	0.814605	1.35420846159812e-06
Gm9844	-1.22456	1.35456657815911e-06
Diaph3	-1.08866	1.37788269595441e-06
2700054A10Rik	-1.02242	1.38833043065696e-06
Stx3	1.45401	1.39546210503956e-06
Lrp1	-0.339961	1.40936982539568e-06
Npc2	-0.447416	1.43586293985829e-06
Selenow	-0.381575	1.44840316340776e-06
Col6a1	-0.714449	1.44840316340776e-06
Gab1	0.349736	1.44840316340776e-06
4930523C07Rik	-0.809469	1.45005209238248e-06
Apbb2	-0.4411	1.45292444062585e-06
Gm28652	-3.37584	1.45329907751337e-06
Notum	-2.53823	1.46735793641954e-06
Tnfsf9	1.47172	1.48581311232313e-06
Cd38	1.75715	1.4904192789927e-06
Atf2	0.238199	1.49734701103951e-06
Mdga2	-1.18434	1.499017965731e-06
1600010M07Rik	0.457217	1.50263113099437e-06
Plscr1	0.870064	1.51874831860869e-06
Gm49959	0.770805	1.53953524471166e-06
Mvk	-0.785268	1.55308106280328e-06
Sde2	0.376001	1.55308106280328e-06
Fndc3a	0.839456	1.55308106280328e-06
R3hdm1	0.390714	1.55977761466277e-06
Ttbk1	-1.06983	1.5785962629722e-06
Reep1	-0.989172	1.63151027099948e-06
Lef1	-1.47846	1.63151027099948e-06
Nedd4	-0.184704	1.6323224775481e-06
Gpx3	-1.02765	1.65803163624357e-06
Cpsf6	0.26943	1.67940101682085e-06
Greb1	1.09888	1.71075222501378e-06
Map6	-0.854556	1.73485614114684e-06
E130102H24Rik	0.666609	1.73713516225905e-06
Efnb1	-0.530804	1.75486417846959e-06
Coa3	-0.495531	1.77654820316162e-06
4933424G05Rik	1.00926	1.84433807643556e-06
Dpp3	-0.459672	1.85395122402517e-06
Dsg2	1.76611	1.86990728319905e-06
Acadl	-0.499652	1.8963039024164e-06
Cox6a1	-0.378139	1.93330208425949e-06
Gm11476	-1.21846	1.94255555049597e-06
Gm17749	-1.16827	1.96607537787446e-06
S1pr1	0.953125	1.97735826495103e-06
Gm49890	2.03601	2.02074037394776e-06
Dlgap1	0.540241	2.03514404656032e-06
Ccl11	1.04941	2.06858689925742e-06
Cox6b1	-0.414811	2.11326824543931e-06
Ajap1	1.58737	2.13843735036147e-06
Fsd1l	-0.41329	2.1859205272902e-06
C030017B01Rik	1.3916	2.1859205272902e-06
Aldoa	-0.417399	2.19131847384957e-06
Ssbp4	0.405009	2.21120456704846e-06
Tubb2a	-0.715744	2.21236846103965e-06
Park7	-0.363068	2.21236846103965e-06
Phyhipl	1.61892	2.21236846103965e-06
Mipol1	0.401587	2.24611696069463e-06
Tbxa2r	-1.16835	2.26220167239972e-06
Map4k4	0.322069	2.26220167239972e-06
Fnbp1	-0.403079	2.27065265213425e-06
Selplg	-1.17905	2.28800540165484e-06
Pik3c2a	0.454849	2.28800540165484e-06
Tmem236	-1.11889	2.29576372730383e-06
8030453O22Rik	0.931563	2.29724505052363e-06
Ckap2l	-1.08844	2.36463639424209e-06
Ptprd	-0.48698	2.37859920151807e-06
Gpr153	-0.532515	2.39254153806313e-06
Xpo7	0.226872	2.3952572605007e-06
Camk2a	0.999097	2.39881469828546e-06
Pknox2	0.66515	2.40659222969079e-06
Cntfr	-0.519724	2.40975267760102e-06
Jmjd1c	0.53559	2.41216915604152e-06
Blnk	3.75441	2.43675339041366e-06
Samm50	-0.38309	2.46133637819592e-06
Trib2	1.28156	2.46409196378074e-06
Adgrb3	-0.544319	2.46409196378074e-06
Actg1	-0.464442	2.47345862567179e-06
Lrrc1	0.570859	2.50460269759823e-06
Jpt2	-0.565467	2.51123527248017e-06
Layn	-1.45196	2.56223884278729e-06
Hinfp	0.434619	2.57224786988609e-06
Tex29	-1.40444	2.59056479470492e-06
Pdgfrb	-0.452174	2.63545264809736e-06
Zswim5	0.871445	2.69554487295752e-06
Ythdf3	0.228371	2.7301053118657e-06
Cth	-1.03777	2.78546402137303e-06
Dlx5	0.880111	2.80664470054012e-06
Spry2	0.860955	2.81596701602731e-06
Scn8a	-0.531991	2.84010857670913e-06
Gm38409	2.93477	2.8456949405976e-06
Brd8	0.249109	2.86387158396899e-06
Gm45051	1.05135	2.86558065410031e-06
Ppp1r12b	-0.290122	2.87285547638869e-06
Nfkbiz	0.843702	2.87481999384572e-06
Tuba1b	-0.622724	2.90268811994434e-06
Hivep3	0.83441	2.90405903265655e-06
Prpf39	0.312017	2.90443695175079e-06
Mtr	0.375995	2.90604193576102e-06
Tbc1d8	0.862331	2.97162435994057e-06
Tbc1d1	0.390286	2.99479433106287e-06
Pdlim2	-0.859208	2.99599202963791e-06
Pdgfrl	-1.35441	3.0279870224279e-06
Txndc8	-1.83375	3.05470079125085e-06
Col18a1	1.25581	3.05641719851312e-06
Cavin1	-0.995715	3.15962417591647e-06
Ptprb	-1.16274	3.1838229379758e-06
Mlec	-0.368217	3.1838229379758e-06
Egln1	-0.306331	3.19161195527776e-06
Tmsb4x	-0.394773	3.22453833957386e-06
Kank4	-0.536373	3.24481346857602e-06
Cebpg	0.531131	3.26825591183131e-06
Psmg1	-0.389312	3.30986479533108e-06
A430106G13Rik	0.751267	3.30986479533108e-06
Tmem135	0.409451	3.32825469371854e-06
S1pr3	-0.596317	3.35723355474047e-06
Ube3c	0.273465	3.37609543951419e-06
Psmd2	-0.315161	3.41674400222382e-06
Gm48957	-1.16897	3.41674400222382e-06
Adcyap1r1	2.18576	3.44206410652052e-06
Cgref1	-1.06942	3.4533893922731e-06
Ryr3	-1.20657	3.45350417013392e-06
Rundc3b	0.860373	3.45350417013392e-06
Smad6	-0.840777	3.45820846662046e-06
Rnf138	0.334424	3.46799306713006e-06
Tcf7l2	0.731649	3.46879811267341e-06
Iyd	-3.61835	3.51496344942404e-06
Cdc42bpa	-0.446623	3.51784595495788e-06
Uqcrc1	-0.343297	3.58801718981835e-06
Saa1	5.27846	3.62815973367504e-06
Gprc5b	0.908037	3.63097211260177e-06
Hspd1	0.489093	3.63353215297581e-06
Cyp26a1	2.54933	3.65582152677782e-06
Adamtsl3	1.0208	3.68438899586149e-06
Cbln1	-2.59629	3.72475526683568e-06
Ccnb1	-1.32165	3.7629810339437e-06
Dpysl3	-0.505513	3.77547902152117e-06
Igf2r	0.628406	3.780763569076e-06
Mtpn	-0.25694	3.78969172156929e-06
Rabac1	-0.332456	3.80161600326506e-06
Gnai2	-0.45975	3.80161600326506e-06
Pcca	-0.64992	3.83362981767838e-06
Surf4	-0.325751	3.85370942074188e-06
Fabp5	-0.615177	3.9223685089826e-06
Ddb2	0.549313	3.93227301007008e-06
Dync2h1	0.331711	3.96078826015817e-06
4930483K19Rik	-1.59095	3.98719210343537e-06
Lamtor2	-0.413004	3.98811470635362e-06
Abi2	0.283962	3.99065976756806e-06
Dner	-0.679952	4.01128066914324e-06
Igsf10	-0.784501	4.0373520695195e-06
Myoz2	-1.7728	4.08796452000399e-06
Col4a2	-0.4234	4.1859884226569e-06
Tgfb2	0.618386	4.19817295261742e-06
Pid1	-0.683743	4.20473009519603e-06
Epha6	-1.12808	4.25264398975518e-06
Sparcl1	0.805188	4.25290935413972e-06
Mapk8ip1	0.558708	4.27878613598964e-06
Uggt2	0.385541	4.30125188752803e-06
Ntrk1	3.82066	4.37747421896548e-06
Dok6	0.760916	4.40232158619416e-06
D930020B18Rik	1.72954	4.40938528419205e-06
Il13ra1	1.40584	4.45031278453475e-06
Mapk3	-0.526393	4.48756471099166e-06
Ube2c	-0.851572	4.52294674950428e-06
Adra2a	-1.26463	4.53593609521705e-06
Ly6e	0.749827	4.56161963523159e-06
Abracl	-0.868191	4.56161963523159e-06
Kdm2a	0.267887	4.60896384363186e-06
Klhl3	0.61213	4.61246001585067e-06
Ythdc1	0.223832	4.62208598800385e-06
Plch2	-1.02994	4.640302133911e-06
Taldo1	-0.40305	4.64249261585609e-06
Slc5a3	0.741603	4.69648457609829e-06
Snai1	-1.41936	4.69648457609829e-06
Dynlt3	-0.54696	4.75087468409783e-06
Gm15155	-0.985832	4.76387178935031e-06
Mfge8	-0.468283	4.76387178935031e-06
Pfn1	-0.564599	4.76387178935031e-06
4921539H07Rik	-1.76966	4.78702409785365e-06
Ppp1r1c	-1.22937	4.81365073528938e-06
Zfp266	0.331485	4.82806338314265e-06
Entpd1	1.05819	4.87485828578634e-06
Gm11084	-0.635494	4.88571556444306e-06
Grp	1.66909	4.88571556444306e-06
Anapc15	-0.69822	4.89635479462946e-06
Zranb1	0.227484	4.89635479462946e-06
Alg5	-0.401699	4.90294829503937e-06
Ccnl1	0.322951	4.90826703252054e-06
Pgm5	-0.543397	4.94562820674575e-06
Mrps24	-0.352452	4.9592633685016e-06
Gm11884	-1.64247	4.97803351831295e-06
Sigmar1	-0.505924	4.99978688887944e-06
Csrp2	-0.583665	4.99978688887944e-06
Gm17308	-2.44614	5.16250951028778e-06
Dnmbp	0.542574	5.16359060754725e-06
Ccl7	-1.55642	5.18671774850196e-06
Atp6v0a4	-0.598304	5.20035430601014e-06
Zfp787	0.484454	5.22407449057195e-06
Ccdc38	-1.0194	5.24856135914771e-06
Bzw1	-0.289593	5.36695521812594e-06
Kif23	-1.10219	5.37228904464532e-06
Kantr	0.394246	5.41327317377128e-06
St6galnac3	-0.355255	5.431878628307e-06
Limd1	0.348779	5.43199869478539e-06
Gm48740	-1.26542	5.46609621616484e-06
Spink13	-1.65294	5.49346064552307e-06
Gm48084	-1.61373	5.54243502713115e-06
Pspc1	0.248731	5.54633355215653e-06
Cdh6	-1.22027	5.55265275780152e-06
Gm48155	-4.09601	5.56029510475787e-06
Rpsa	-0.354304	5.57350308492306e-06
Cnih1	-0.352094	5.68428350097918e-06
Trmt13	0.426491	5.77076487208755e-06
Efnb2	-0.977154	5.77383301880836e-06
Iqgap3	-1.88024	5.85147639170949e-06
Usp6nl	0.443046	5.86444386167378e-06
Hoxd3os1	-2.1967	5.90832014130359e-06
Zbtb10	0.672374	5.9892525713439e-06
9130024F11Rik	2.53064	6.01570765377729e-06
Ifi30	-0.645472	6.03226018121512e-06
Zfp36l2	-0.508957	6.09615372913e-06
Hmmr	-1.39366	6.14897886446502e-06
Lss	-0.77549	6.14897886446502e-06
9130410C08Rik	1.81215	6.19744632903582e-06
Rit2	-1.43224	6.25247352459069e-06
Gm49732	1.67654	6.26433213884954e-06
Gm50399	-1.05946	6.2993491061453e-06
Dusp5	1.01566	6.30223390367896e-06
Spred3	0.84828	6.33705943684603e-06
Melk	-1.22297	6.34093731832318e-06
Bcar3	0.74337	6.34512932681752e-06
Tpd52	0.814395	6.34624020487831e-06
2600014E21Rik	-3.30752	6.43019222810825e-06
Baz2b	0.225191	6.51101155657375e-06
Kdm5b	0.257787	6.5300574986299e-06
Tra2a	0.218848	6.63856480204971e-06
Arhgap26	1.23796	6.72820772175961e-06
Nagk	-0.431917	6.73306915453396e-06
Apoe	-1.24356	6.74764613642205e-06
2700089I24Rik	-1.87564	6.76644396142634e-06
Gpc6	0.815363	6.76711341153672e-06
Mdm1	0.506962	6.82829509705776e-06
Trp53bp1	0.393407	6.8310479119457e-06
Zfand4	-0.5617	6.89111186114358e-06
Cemip	-1.9906	6.91695070052659e-06
Txndc17	-0.429251	6.92346333537145e-06
Dip2c	0.215445	6.94376670950371e-06
Camkv	1.22964	7.01986628192092e-06
Gm35696	-1.57658	7.09351887330028e-06
Gm28403	-1.00895	7.20140213057355e-06
Stard13	0.737384	7.24525157329477e-06
Msh3	0.458743	7.3738001357759e-06
Lgr4	0.631636	7.46580694908616e-06
Ptpn12	0.446031	7.48244635735428e-06
Mpzl3	1.23585	7.52330405102338e-06
Baiap2	0.855623	7.6229775378258e-06
Rsbn1l	0.344057	7.62964871855699e-06
Dusp14	0.728762	7.69718905831121e-06
Dnpep	-0.466228	7.73366680462337e-06
Gm15886	0.883503	7.81625938756507e-06
9630014M24Rik	0.617747	7.88660069671621e-06
Pea15a	0.373802	7.92702946354012e-06
Ephb1	0.674329	7.94988451624584e-06
Gm30524	-2.05136	7.97381420308759e-06
Efcab11	-1.06551	8.10258515802379e-06
Taf3	0.337842	8.14823097185076e-06
Ank2	0.241431	8.26202773263502e-06
Gm15563	0.580927	8.28980333247543e-06
Nxn	-0.625962	8.3183426439653e-06
Cldn1	1.00254	8.31985225465563e-06
Osgin2	0.728061	8.43913144567656e-06
Sel1l3	1.34419	8.47340002427529e-06
Lemd3	0.330265	8.56778137048526e-06
Ccnb3	1.69666	8.56778137048526e-06
Lrfn2	1.09387	8.62937718113362e-06
Tmem64	-0.468057	8.62937718113362e-06
Gm49622	-1.83086	8.78404057467465e-06
Itga10	-0.802444	8.85167954471942e-06
Cat	-0.326825	8.86667464907689e-06
Rab3gap1	0.304995	8.97392068777423e-06
Stk10	-0.529366	8.99762225759936e-06
Mbnl3	0.776882	9.20871584892214e-06
Tex10	0.346177	9.20996855618932e-06
Eif2ak3	0.37311	9.28680570674127e-06
Myo1e	0.519964	9.33174111808317e-06
Nucks1	-0.309139	9.37423816526548e-06
Stx8	-0.390019	9.58975249660332e-06
Adamts5	-0.863883	9.68069516143241e-06
Papola	0.227248	9.7531751901248e-06
Pcdh9	-0.682591	9.80769587151414e-06
Mb	-0.95496	9.87980084894409e-06
Prl2c3	-1.70228	9.95877437264533e-06
Cyb5a	-0.668541	1.00779988234539e-05
Ccnb2	-0.739044	1.01336266808846e-05
Nol3	-1.12922	1.01545696913713e-05
Ergic3	-0.32857	1.01743451480461e-05
Gm45075	-1.59513	1.02418672374814e-05
Mylk	-0.690722	1.03452083683262e-05
Muc19	-2.20706	1.04908060534151e-05
Hist1h1c	0.779241	1.06847841715087e-05
Lman2l	0.355298	1.07661644803626e-05
Tmem160	-0.412838	1.09469767400861e-05
Sybu	-1.30792	1.10678882223644e-05
Hist3h2a	0.792142	1.11417465010677e-05
1110017D15Rik	-1.0697	1.11671265856276e-05
Nans	-0.449322	1.11671265856276e-05
Cd200	1.44544	1.12727760154517e-05
Pkdcc	0.479915	1.12774435426969e-05
Svbp	-0.393592	1.13200170490536e-05
Ppa2	-0.373196	1.14053229121019e-05
4930452B06Rik	-1.14452	1.14131567219235e-05
Rere	0.296581	1.14595288720749e-05
Plk2	-0.676773	1.16206627711843e-05
0610040J01Rik	1.65975	1.16328790717023e-05
Gm15787	0.671245	1.17597231299037e-05
Spc24	-0.890639	1.17707096636992e-05
Ccdc124	-0.55676	1.17707096636992e-05
Dcaf6	0.272553	1.19987706713335e-05
Trak1	0.569075	1.21767805997335e-05
Nefl	1.34984	1.22960303936284e-05
Cxcl14	-2.61568	1.23019147222221e-05
Nptx2	2.12928	1.23147642054454e-05
Prxl2a	-0.422274	1.23557759124168e-05
Mpnd	-0.502373	1.25727383785193e-05
Fam13a	1.01611	1.25785732471266e-05
Plscr3	-0.552775	1.25830417395364e-05
Itpr2	0.844727	1.2697877628947e-05
Stat4	-1.68862	1.27562267088075e-05
Trp53bp2	0.409684	1.28620127388857e-05
N4bp2	0.286148	1.28818308556092e-05
Abhd3	1.19031	1.2917418803173e-05
Gtdc1	0.419083	1.30327851026531e-05
Mxd4	-0.339109	1.31901784485851e-05
Rnf6	0.434795	1.32115251395493e-05
Gtpbp2	0.438983	1.33781158080594e-05
Arhgef12	0.326218	1.34398727741604e-05
Ubl4a	-0.512796	1.34398727741604e-05
Gm11802	-1.04784	1.35932544918589e-05
Wipf3	2.47523	1.3723242919025e-05
Qtrt2	0.498486	1.3723242919025e-05
Cntnap3	2.80875	1.3954578266111e-05
Xpo6	0.36336	1.40034329723853e-05
Pip5k1b	1.2869	1.40936052384715e-05
Spsb4	0.837525	1.40936052384715e-05
Atp5o	-0.412446	1.41069638168689e-05
Galnt12	1.71143	1.41421150311972e-05
D030068K23Rik	-1.75376	1.44860404562742e-05
Lysmd3	0.348585	1.45308697210383e-05
Dtnb	0.288681	1.4629024771553e-05
F11r	1.20415	1.46544436996657e-05
Ptchd1	0.910828	1.47032835117166e-05
Egr1	1.06126	1.47190216763031e-05
Cped1	-1.17263	1.48034770681125e-05
1700012D14Rik	-0.694023	1.48906673741507e-05
Pla2g4a	0.495775	1.49710989804085e-05
Polb	0.295913	1.51283215651222e-05
Mdm2	0.271247	1.51643264561431e-05
Lsm10	-0.529891	1.52259546106342e-05
Phka2	0.673886	1.53056134969483e-05
Luc7l2	0.376618	1.54505189113675e-05
Chst14	-0.557512	1.55158396801112e-05
Usp32	0.293721	1.56024095699807e-05
1700016P03Rik	1.31814	1.5698068117946e-05
Gabarap	-0.371194	1.57010615101292e-05
Parp9	1.3916	1.57493521354587e-05
Arhgef3	0.81106	1.58562930949699e-05
Avl9	0.536666	1.59133702172507e-05
Atp1a2	-1.1838	1.61087865365498e-05
Slc39a10	-0.306682	1.61780176789958e-05
Tbx15	-1.1722	1.62109516157232e-05
Ip6k2	0.310609	1.62779547433775e-05
Tfcp2	0.433495	1.62850767227877e-05
Rint1	0.323973	1.62977102728786e-05
Flywch2	0.660895	1.65578287283278e-05
Ptpn3	0.523596	1.66704223926927e-05
Smap2	0.412904	1.68852663500408e-05
Tigd2	0.734686	1.72343925182097e-05
Gm29681	-1.29863	1.72343925182097e-05
Igfbp5	1.07133	1.73205214316184e-05
Gm2164	-0.986035	1.77374801723736e-05
Efhb	0.682589	1.77876175745927e-05
Wipf1	0.422569	1.79319788973095e-05
Fam162b	2.24531	1.79658953350019e-05
Prkd2	0.386045	1.79925109531041e-05
Txnip	0.347485	1.802814102215e-05
Slc8a3	-0.683456	1.80296424897872e-05
Plekha3	0.388758	1.81040323871551e-05
A330008L17Rik	-2.22865	1.81150773330934e-05
Ust	-0.438664	1.86023847848652e-05
Rp1	-3.3347	1.86427192528683e-05
Gm16863	-1.00199	1.86560623238922e-05
Xndc1	0.403978	1.87212664443944e-05
Zfp719	0.600762	1.88647977458099e-05
Zfp609	0.362066	1.89236829914203e-05
Hook1	0.912981	1.8972528049644e-05
Maob	-1.05747	1.89979866501027e-05
Psmd7	-0.316366	1.92440024667268e-05
Batf3	0.949055	1.92440024667268e-05
Chd3	-0.399508	1.92440024667268e-05
Cnn2	-0.780944	1.94877286439538e-05
Lrrc8d	0.81866	1.95767695154257e-05
Wasl	0.215818	1.96211370173144e-05
Stk32a	-0.959557	1.97936527811318e-05
Zbtb44	0.33809	1.99193158438236e-05
Adcy5	-0.670634	1.99700172671572e-05
Dnase2a	0.75541	1.99733547279301e-05
Shq1	0.406242	2.00448117973813e-05
Adgrl2	-0.498999	2.01478502110671e-05
1810034E14Rik	0.666023	2.0367122245446e-05
Esyt1	-0.476416	2.03705065379148e-05
Ppia	-0.484549	2.04014799059798e-05
Xlr	-1.61757	2.04047673307347e-05
Dpysl2	-0.650131	2.05947304365213e-05
Cadps	-1.68854	2.06597389616365e-05
Kmt5b	0.273921	2.08261845607532e-05
Ftx	0.521728	2.11487125156162e-05
Gm26936	0.650339	2.11487125156162e-05
Fam168a	0.306711	2.12216452527702e-05
Kif1a	-0.632685	2.13184706168435e-05
4930445E18Rik	-0.989798	2.20734167426385e-05
Gpx8	-0.36332	2.21431279318334e-05
Etl4	-0.520426	2.22535716686569e-05
Depdc7	-0.721614	2.26260989883343e-05
Socs2	0.526057	2.26685011761841e-05
Gm49750	-1.10637	2.29622345800663e-05
Fbxo42	0.511537	2.30302794636719e-05
Erp27	-2.24084	2.38151626844236e-05
Sfrp5	-2.84859	2.38151626844236e-05
Gm28730	-1.29708	2.40318053144896e-05
Pcp4	2.30087	2.41804294521749e-05
Rab3d	-0.966978	2.42006243972646e-05
Gprasp1	0.300604	2.42079630421408e-05
Ebp	-0.612465	2.43472554091266e-05
Arl15	0.511082	2.4444564006114e-05
Dnajb4	0.457683	2.46010901189371e-05
Tmem170	0.554759	2.4846571107977e-05
Ugp2	0.333015	2.54806975449255e-05
Prkce	0.349933	2.55917660550735e-05
Gm20646	-1.48877	2.57051872363701e-05
E230016M11Rik	-0.639626	2.58425105114658e-05
Spin2c	-0.849298	2.58471465515764e-05
Plekhg1	-0.726196	2.58584457356817e-05
9930021J03Rik	0.313236	2.59366295990625e-05
F2rl1	0.996489	2.59366295990625e-05
Gm11638	-0.903396	2.59711827662166e-05
Khdrbs2	1.23791	2.60216040092315e-05
Lrrc8c	0.615273	2.62299891433265e-05
Elk3	0.344635	2.63127879942037e-05
Deptor	1.17059	2.63164031789118e-05
Igfbp4	-0.385855	2.63735888378315e-05
Noc3l	0.450358	2.63735888378315e-05
Fkbp10	-0.378075	2.65174782197179e-05
Col5a1	-0.392312	2.65505555197184e-05
Pmvk	-0.493441	2.65541811970505e-05
Gfpt1	0.259467	2.6900286061126e-05
Xpnpep1	-0.310742	2.72049066608808e-05
Entpd7	-0.506956	2.73267764257699e-05
Tcf7	-0.991068	2.7362088696072e-05
Rps2	-0.50813	2.7362088696072e-05
March6	0.276548	2.74510099000997e-05
Ccdc30	1.13268	2.75124072563816e-05
Pdia3	-0.276402	2.75338394951578e-05
Gpc5	0.960587	2.7547423688544e-05
B2m	-0.640151	2.79633761797336e-05
Ubn1	0.227362	2.80287697476751e-05
Mxd1	0.522162	2.8036649284448e-05
Gm41556	-0.946692	2.84983730667798e-05
Akr1b8	-0.956407	2.88629672302918e-05
Dennd5a	0.338915	2.92587775582997e-05
Plin2	-0.387809	2.93541251645789e-05
Airn	0.679499	2.93541251645789e-05
Cd248	-0.486689	2.93929857341151e-05
Anxa11	0.856725	2.95579867987131e-05
Npat	0.401632	2.96465629361358e-05
Fam163a	-1.28994	2.99988801842683e-05
Rac1	-0.202739	3.02282058209621e-05
Mapk10	0.961823	3.02282058209621e-05
Eya1	0.514409	3.02282058209621e-05
Atp6ap2	0.561662	3.04715297981991e-05
Pax9	2.17939	3.08418990454216e-05
Pick1	0.451948	3.09297746783052e-05
Arhgef28	0.950914	3.10166145099753e-05
Slc29a3	-0.651562	3.10545768526034e-05
Agbl1	1.27923	3.14668394700394e-05
Six1	0.751001	3.16468418925889e-05
Bax	-0.333592	3.22957190338145e-05
Rgs20	1.09676	3.25258985733512e-05
Arhgap45	-0.972111	3.27890599845731e-05
Add1	-0.340537	3.28692579816301e-05
Lpp	-0.253248	3.28692579816301e-05
Pkp4	0.974194	3.29732301223611e-05
Arpin	-0.785663	3.29960714122621e-05
Dnah12	-1.1455	3.31225870292e-05
Gm30382	-0.76016	3.3134676309452e-05
Ccdc112	0.414311	3.34469955631865e-05
Gm50138	1.18508	3.34730794036498e-05
Mafb	0.540856	3.37144351969593e-05
Ankrd55	-0.645669	3.39882850931354e-05
Psat1	-0.743755	3.39936208367278e-05
Myo3b	-0.884783	3.40411692602452e-05
Rnf25	0.330907	3.40411692602452e-05
Mki67	-1.03161	3.4107598704304e-05
Ppp1r3c	1.1321	3.42464017793419e-05
Prickle1	-0.434818	3.44951404862741e-05
Rwdd1	-0.292248	3.53604001461463e-05
Gpr83	1.91395	3.55180415122749e-05
Tjp2	0.670494	3.59787372832034e-05
Nf1	0.349017	3.60723029649993e-05
Alkbh1	0.392271	3.60758903433736e-05
Stmn1	-0.871761	3.60758903433736e-05
Syt9	1.06255	3.61040214552894e-05
Rnf165	0.394969	3.63535644046427e-05
Eif5a	-0.399786	3.67446010139501e-05
Gtf2ird2	0.423865	3.67511173543042e-05
Pantr1	-1.31728	3.71387310656791e-05
Camk2b	0.858068	3.71513709547221e-05
Spag16	-2.12681	3.71548501221222e-05
Tafa5	-0.445782	3.76809802372896e-05
Efemp2	-0.455523	3.85485865444963e-05
Kcnb2	0.749623	3.86401706235437e-05
Dnajc9	-0.34512	3.90746216995651e-05
Nup153	0.281373	3.95089426857214e-05
Rsbn1	0.258679	3.96922222976266e-05
Cdc37l1	0.301971	3.97225588909553e-05
Gm20559	-1.34192	3.98266785778739e-05
Prickle2	-0.425401	4.03544288270861e-05
Gm48748	-1.58828	4.03943964445831e-05
Ninj1	-0.481639	4.04275786985527e-05
B4galnt4	0.593804	4.04989333437261e-05
Flrt3	-0.531801	4.11572352286434e-05
2900052N01Rik	-2.39677	4.11969771658358e-05
Wdr60	0.337049	4.13261401903831e-05
Kcnk3	1.54268	4.1619310817111e-05
Pfkl	-0.382215	4.1619310817111e-05
Klk8	1.58905	4.1619310817111e-05
Ccdc3	1.05575	4.25930470235219e-05
Phka1	0.444336	4.27233981318183e-05
Myef2	0.302912	4.31357955232216e-05
Doc2b	0.630634	4.33753040788655e-05
S100a1	-1.05896	4.38429998737742e-05
Gm12305	-2.3671	4.4181596960033e-05
Slc15a4	-0.630071	4.4465928486534e-05
Tmem42	-0.713946	4.45087970559122e-05
Cenpa	-0.668169	4.48970898224347e-05
P3h1	-0.311465	4.52330595075737e-05
Rreb1	-0.348304	4.55088796981278e-05
Cacna1e	0.998803	4.5614005861162e-05
Pard6b	1.31777	4.58242816364944e-05
Cdc20	-0.918496	4.61452793748204e-05
Limd2	-0.520691	4.7075755111904e-05
Stk3	-0.263678	4.7147319395045e-05
1500009L16Rik	-0.402192	4.72068088538159e-05
Ankrd50	0.590445	4.74759828993192e-05
Arf3	0.347455	4.778453641747e-05
Dnah7b	0.673907	4.7834473646046e-05
Kcnd2	-0.561982	4.78417520852595e-05
Brd4	0.220858	4.93471088042147e-05
Psmd6	-0.426292	4.93471088042147e-05
Pcp4l1	1.11142	4.93954748078506e-05
A830008E24Rik	-2.68101	4.9481552751391e-05
Mif	-0.456076	4.97361812735053e-05
Ttc23l	-0.753532	4.98427049566924e-05
Gm43948	-0.396829	5.01629147490002e-05
Ctsc	-0.892384	5.03101155498513e-05
Scmh1	0.291856	5.03101155498513e-05
Cenpj	-0.765258	5.03101155498513e-05
Mid2	0.797505	5.05236322478394e-05
D430019H16Rik	0.49189	5.06243395056671e-05
Nav3	-0.761388	5.11181107887048e-05
Ppm1b	0.29356	5.13206636029151e-05
Cenph	-0.709147	5.13399597711496e-05
Gm14858	0.695516	5.13399597711496e-05
Fbxo44	1.02854	5.13529985867151e-05
Slc35b2	-0.424264	5.13987998753283e-05
Gm49698	-1.55585	5.16750232169481e-05
Med10	-0.391704	5.17469303941944e-05
Tshz1	0.433084	5.24206979104645e-05
Plk3	0.84887	5.2579974250548e-05
Rpl5	-0.175406	5.26393165849599e-05
Kcnip1	-1.0191	5.27771581959703e-05
Dusp4	1.53836	5.31599203052739e-05
Zeb2	-0.639085	5.3682402769479e-05
Chst10	-0.853592	5.38792567796696e-05
Dmp1	3.75514	5.48702814630424e-05
Gm20125	-1.86631	5.49015242438961e-05
Tgm4	-0.701699	5.50169540046753e-05
Socs5	0.442098	5.53876118488288e-05
Sri	-0.37783	5.55027523526311e-05
Sgca	-1.37751	5.59974733637104e-05
Rbm26	0.25229	5.66878284385554e-05
Endod1	-0.629607	5.69241457125832e-05
Map9	0.562043	5.71767972089635e-05
Alg13	0.641913	5.77687666950424e-05
Gca	2.35779	5.85886102228806e-05
Mink1	0.511835	5.87195067582948e-05
Slpi	-1.43132	5.87195067582948e-05
Fxyd5	-1.89485	5.87767437625687e-05
Zbtb18	-0.870407	5.87767437625687e-05
Fh1	-0.355401	5.88774113523563e-05
Ccny	0.186819	5.94572027452111e-05
Col11a2	-0.856861	5.95828806918624e-05
Il34	-0.598246	5.96931331516829e-05
Ric1	0.369626	5.96931331516829e-05
Matn2	-0.661163	5.96931331516829e-05
Scd2	-0.413861	5.99995476689491e-05
Gm48715	2.38792	6.01082727929514e-05
Zswim7	0.447489	6.11615965527797e-05
Msx2	-2.38068	6.1606633609385e-05
Minar2	-0.804133	6.1606633609385e-05
Tnnt1	1.26088	6.1826944900571e-05
Rev3l	0.355431	6.21250984265129e-05
Mmp11	-0.648926	6.26024256752e-05
Carhsp1	-0.458446	6.30478024902207e-05
Pappa	0.430542	6.33871522852636e-05
Dlx1as	1.4271	6.45155215637853e-05
Tmem150a	-0.614376	6.45231034760859e-05
Spink2	1.13848	6.50669045429953e-05
Calhm5	-1.39193	6.53597435905e-05
Btn2a2	1.84904	6.56489147626046e-05
Mr1	0.845061	6.56489147626046e-05
Slc2a3	0.95278	6.61036670813396e-05
Calcb	2.36744	6.619603289846e-05
Msrb1	-0.509264	6.71804704858832e-05
Vezf1	0.220081	6.72636803104295e-05
Atf7	0.235145	6.76532918362493e-05
Mapk8ip3	0.3426	6.82828650347126e-05
Gm16552	0.672282	6.90673253981751e-05
Mgarp	-1.38825	6.99620428031146e-05
Tnrc6b	0.240429	7.04242640321519e-05
Cyld	0.434874	7.04251776153067e-05
Phf10	0.263231	7.05947328028286e-05
Epas1	1.7646	7.10384353135245e-05
Morrbid	-1.2444	7.15930875162966e-05
Lrrn4cl	-1.50809	7.16992253434709e-05
Psmc5	-0.361704	7.18132560609074e-05
Npas2	1.99029	7.25818497333215e-05
Ppp1cb	0.225304	7.27471635911979e-05
Nsdhl	-0.91354	7.27865656351309e-05
3830403N18Rik	-2.31201	7.4514386679343e-05
Gm47728	-0.958999	7.46240257910522e-05
Sike1	-0.353083	7.53567578618134e-05
Urb2	0.609542	7.54373001749684e-05
Ola1	-0.250495	7.55104111504513e-05
Podn	-0.831374	7.5586312880869e-05
Clip1	-0.384196	7.61120501395025e-05
Dtx1	0.98476	7.61120501395025e-05
Gpha2	-1.59832	7.61120501395025e-05
Fgf13	0.547794	7.61349133213021e-05
Kif15	-0.832307	7.6219492389809e-05
Fbxo2	1.98489	7.62347366143422e-05
Aldh1a1	-2.37924	7.75749595246163e-05
Nol4	0.881577	7.76954876326078e-05
Cks2	-0.750795	7.76954876326078e-05
Palld	-0.274121	7.79842327173159e-05
Kcne4	-1.42584	7.79887101046428e-05
Foxl2	-1.06623	7.81143476293492e-05
Guk1	-0.398909	7.86186438888368e-05
4933436I20Rik	-1.74394	7.88991829491439e-05
Prkar1b	0.636749	7.89083476305253e-05
Smchd1	0.268771	7.93811306427727e-05
Tspan15	0.873661	7.95250563528998e-05
Tspan18	0.988023	8.04011670945759e-05
Nipal3	0.964468	8.07091667714486e-05
Dmxl1	0.321818	8.07122876772744e-05
Nsfl1c	-0.329747	8.09886177034879e-05
Kif13b	0.467112	8.15572358704927e-05
Mcfd2	-0.325678	8.27213524540899e-05
Incenp	-0.826635	8.2773684209272e-05
Adgrf5	2.29807	8.32475587802505e-05
Mtmr3	0.2873	8.36352974372271e-05
Gli2	-0.474211	8.37503517722602e-05
Tecpr2	0.369927	8.39347836666192e-05
Gm11240	4.67471	8.41579984564118e-05
Slc25a12	0.420999	8.41579984564118e-05
Msn	-0.508539	8.41579984564118e-05
Ikzf1	1.74758	8.43116215132539e-05
Tmem184b	-0.340744	8.45894038039371e-05
Frat1	1.07399	8.45894038039371e-05
Kdm3a	0.279812	8.45894038039371e-05
Ndst3	-1.23325	8.47213099527878e-05
Slc44a2	0.489343	8.57257768310031e-05
Kcna4	-1.29393	8.57969260619745e-05
Tmem178b	0.837134	8.57969260619745e-05
Hspa12a	0.854123	8.59611096442956e-05
Mlxip	0.494027	8.61041052200644e-05
Bdh1	-0.880429	8.61041052200644e-05
Gps1	-0.356067	8.65539167944287e-05
Nipal1	2.23371	8.78276490151908e-05
Cfap299	1.01887	8.90118366685967e-05
C1qtnf6	-0.590629	8.9223131098356e-05
Oxa1l	0.358721	8.9281015364797e-05
Gclc	0.664908	8.95083815858612e-05
Trappc1	-0.40502	8.95701783940256e-05
Gucy1b1	1.15524	9.07227934382527e-05
Txndc2	-1.77966	9.07227934382527e-05
Pccb	0.504259	9.11941894530628e-05
Clk1	0.210775	9.25706939788981e-05
Gm17106	0.315507	9.30267743456904e-05
Eya4	0.515437	9.31285181661895e-05
Bend3	0.584503	9.34371951974577e-05
Herc4	0.352652	9.38675986399816e-05
Gm46367	0.497807	9.40613530354106e-05
Zar1	-1.02708	9.45052160056031e-05
Adra2c	-2.19534	9.52775858559587e-05
Shisa9	0.724776	9.52775858559587e-05
Adamts12	-0.871751	9.52860248987217e-05
Kcnk1	0.637509	9.55857110983993e-05
Bcl7a	-0.576833	9.67192788250284e-05
Mrps36	-0.364983	9.68321510110441e-05
Osbpl10	0.595555	9.68321510110441e-05
Tnfsf11	2.83952	9.69611084142686e-05
Dnaja1	0.440671	9.69611084142686e-05
Prdm16os	2.07348	9.71410338074995e-05
Lrig1	-0.457793	9.76460568853651e-05
Zdhhc21	0.389318	9.76825349047958e-05
Ndrg1	-0.859644	9.86877294303009e-05
Exoc3	-0.360718	9.89713638010453e-05
Cox6c	-0.556958	0.000100557
Bag2	0.46297	0.000100591
Cables1	0.847966	0.000100923
Zfp941	0.981191	0.000101592
Lsm2	-0.447222	0.000101949
Nanos3	0.823504	0.000102436
Hdlbp	-0.253386	0.000102526
AI606473	1.63934	0.000104273
Asb3	0.238763	0.000104355
Snhg4	0.42593	0.000104466
Dap	-0.331338	0.000105214
Rer1	-0.284437	0.000105529
Cxcl12	0.935595	0.00010621
Gm44993	-1.56097	0.000106609
Acsl4	0.547021	0.000107632
Slc16a2	0.529992	0.000107769
AC142100.1	-0.743878	0.000108077
Tfap2b	-1.42448	0.000110489
Mios	0.459469	0.00011108
Ptprr	-1.35134	0.000111604
Mmp2	-0.436675	0.000111631
Gm48749	-0.904729	0.000111724
Cacul1	0.343751	0.00011199
Col14a1	-1.57641	0.00011239
Zbtb11	0.35678	0.000112494
Myl3	-1.53933	0.000114348
Tmem67	0.523031	0.00011497
Abl2	0.278569	0.0001166
Acat2	-0.660939	0.000118244
Gltp	-0.523684	0.000118595
Spry1	0.446758	0.000118727
Itih5	1.2644	0.000118911
Cep70	0.465782	0.000118945
Mrpl23	-0.591892	0.00012078
Kcnn3	0.845016	0.000120966
Osbpl5	-0.478334	0.000122496
Tspan13	0.462593	0.000125782
Foxp4	0.45641	0.000126286
Fbxw7	0.32615	0.000126504
Wdr26	0.205008	0.000127065
Gadd45g	-0.706314	0.000128071
Ssbp2	0.391521	0.00012828
Arhgef11	0.335732	0.000128496
Wwox	0.379566	0.000128537
Shtn1	1.59691	0.000129866
Ska3	-0.629655	0.000129866
Tmem131	0.404272	0.000131494
Nfrkb	0.354951	0.000131628
Zic1	-1.91393	0.000132577
Kdr	1.60043	0.000132806
Palm3	0.639774	0.000134311
Kremen1	-0.37617	0.000135012
Fbxl12	0.34496	0.000135382
Kif20b	-0.737648	0.00013552
Esrrb	1.21899	0.000137566
Pmp22	-0.655511	0.000137744
Lonrf1	0.657894	0.000138107
Trim47	-0.797142	0.000138384
Usp33	0.316709	0.000138657
Appl2	0.456996	0.000139455
Ppip5k1	0.57923	0.000139625
Kcp	-0.524719	0.000139647
Sort1	0.535586	0.000139903
Nck2	0.305657	0.000141264
Snhg18	-0.555719	0.000141387
Rrm2	-0.657758	0.000141426
Epha5	-0.950422	0.00014159
Dlx1	1.13616	0.00014159
Snx31	-1.09015	0.000141604
Fam149a	0.584234	0.000141999
Fabp4	1.71152	0.000144765
Nuf2	-1.19247	0.000145025
Paqr7	-1.30018	0.000145488
Itgb6	-1.01386	0.000147438
Snf8	-0.283631	0.000147744
Gabra3	0.625051	0.000148635
BC048602	-0.911683	0.000148635
Cnn1	-1.15469	0.000149038
Hk1	-0.389254	0.000149038
Kif5c	0.850195	0.000149123
Gm49189	0.712119	0.000150183
Prrx1	-0.656832	0.000150187
Bscl2	-0.500592	0.000150337
Emb	1.26404	0.000150925
Fgfr3	-0.888368	0.000151001
Dennd1b	0.545199	0.000151948
D030018L15Rik	-2.56459	0.000151948
Ets1	0.673054	0.000152159
Tpp2	0.238973	0.000152976
Filip1	1.18297	0.000157011
Colec12	-0.26179	0.000157011
Arsj	0.592151	0.000157812
Prpf6	0.252379	0.000157976
Ercc6	0.386744	0.000158586
Qprt	1.36751	0.000159714
Trit1	0.404308	0.000160417
Pnck	0.929714	0.000160417
Serpinf1	-0.519165	0.000161172
Mroh9	-2.42497	0.000161173
Trnp1	-0.787982	0.00016135
Spint2	1.14408	0.000164461
Atg13	0.285412	0.000166177
Ift81	0.334545	0.000167929
Atxn3	0.356048	0.000167929
Arl6ip5	-0.298847	0.000170398
Klhl12	0.452529	0.00017043
Smarca1	0.259572	0.000171494
Barx2	2.29069	0.000175113
Ifit1bl2	-2.07643	0.000175877
H3f3b	0.344114	0.00017862
Gm29019	1.50404	0.000178696
Myo1f	-0.650257	0.000179022
Asb9	-1.53398	0.000179022
Gm11551	3.79945	0.000179395
Dcaf1	0.244889	0.000179475
Gm14226	-1.97365	0.000179619
Thbs4	2.08978	0.000185096
Patj	0.492492	0.00018523
Helb	0.49726	0.000185252
Batf	-1.09712	0.000185622
Unkl	0.330028	0.0001859
Sgo2a	-0.977182	0.000186189
Socs4	0.372709	0.000186402
Elovl5	0.524836	0.000186862
Fam221a	0.577006	0.00018839
5033426E14Rik	-4.11748	0.000189502
Stim2	0.323331	0.000190112
Slc29a4	-0.775646	0.000190934
Obsl1	0.384474	0.000191769
Ctnnb1	-0.175847	0.000191769
Tbx3	1.1876	0.000192285
Bdp1	0.226366	0.000192492
Scrn1	0.740254	0.000192911
Trpm5	1.02339	0.000195918
Zfp654	0.405076	0.00019606
Fnbp1l	0.440851	0.00019606
Fdps	-0.828602	0.000198343
Irf6	1.49851	0.000198722
Trpv2	-0.766343	0.000198763
Hoxd8	-2.80374	0.000199562
Cthrc1	-0.800191	0.000199916
Idh1	-0.585813	0.00020075
Dnm3	-0.513616	0.000204115
0610012G03Rik	-0.295151	0.00020432
Snx14	-0.358028	0.000204856
Gm32067	1.43468	0.000205402
Fbxo8	0.33195	0.000207072
Gm15902	0.972256	0.000207684
March8	0.353974	0.000208206
Sdhaf4	-0.38387	0.000209522
Gm6567	-3.5576	0.000209522
Slc1a3	0.568787	0.000209721
Ext1	0.31941	0.000210104
Slc16a13	-1.58337	0.000210104
Gpatch8	0.276288	0.000211946
Ric8a	-0.464427	0.000212009
Fzd1	-0.825974	0.000212009
Nhsl1	-0.389558	0.000213132
Arsi	-1.11112	0.000213132
Csmd2	1.25386	0.000213133
Sema4c	0.476676	0.000213133
Gm43647	3.574	0.000213203
Zfhx3	-0.945138	0.000213203
Zbp1	-1.21681	0.000214209
Spata13	-1.0546	0.000215528
Pld5	-0.531019	0.00021573
Crtap	-0.407345	0.000217114
Cenpw	-0.761824	0.000217703
Sclt1	0.255662	0.000221124
Firre	0.507297	0.000221809
Zfp36	0.975069	0.000222651
Serp1	-0.31098	0.000223862
Commd2	-0.418937	0.000225486
Cops6	-0.370244	0.000225582
Gm49860	-2.02536	0.000226488
Pou3f4	-1.38735	0.000228471
Mmp17	-0.950856	0.000229434
Xxylt1	-0.498633	0.00023205
Sult1a1	1.43658	0.000232724
Asah1	-0.349399	0.000233296
AC163685.1	0.967442	0.000233511
Gm45609	-1.39747	0.000234769
Runx1t1	0.451228	0.000236172
Atf6	0.389083	0.000236258
Slc4a10	-1.48487	0.000240136
1110065P20Rik	-0.348862	0.000242478
Ndufs2	-0.236882	0.000242478
Sim2	2.12939	0.000242658
Pds5b	0.362476	0.000242658
Ntn5	-2.05599	0.000242667
AC103362.1	-0.954842	0.000243638
Ccnt1	0.205352	0.000245041
Atpif1	-0.515282	0.000245496
Ric8b	0.317484	0.000245496
Fkbp3	-0.356137	0.000246608
Mrgprf	-2.94203	0.000246774
Wnt5b	0.488555	0.000247261
Arpc5l	-0.289624	0.000247261
2310002F09Rik	1.57335	0.000247261
2810429I04Rik	0.946179	0.000247434
Arl13b	0.409068	0.000247735
Sbno1	0.272775	0.000248313
Gramd3	0.461768	0.000248313
Pheta2	-0.835964	0.000248947
Ube2q2	0.299735	0.000249221
Ush2a	-0.747037	0.000250675
2010013B24Rik	-2.49379	0.000250839
Igdcc3	-0.793453	0.000252706
Naalad2	0.93532	0.000253231
Cpne8	-0.57114	0.000256775
Pear1	0.499021	0.000257589
Cstb	-0.374736	0.000258123
A430010J10Rik	-1.24424	0.000258582
Sgk1	0.6963	0.000259447
Dcun1d4	0.60701	0.000260113
Gm46401	-2.21716	0.000260807
Nefm	1.88968	0.000260903
Rnf103	0.322391	0.000260903
Sh2d3c	0.890687	0.000261796
Asah2	0.4773	0.000262079
Cct8	-0.256209	0.000262302
Mxra7	-0.307383	0.000265461
Wwc2	-0.380746	0.000265848
Mad2l1	-0.659789	0.000266083
Rif1	0.381731	0.000267108
Ndufa1	-0.588724	0.000268836
Pgbd5	-0.999031	0.000268836
Nid1	-0.326111	0.000268836
Nlk	0.215584	0.00026884
Wapl	0.268069	0.000269459
Gm32442	-1.38027	0.000270085
Ddhd1	0.524892	0.000270479
Rab33a	-0.923874	0.000270551
Tm7sf2	-0.725054	0.00027142
Xdh	-1.81491	0.00027236
4930414N06Rik	0.607469	0.00027236
Gm28791	0.509831	0.00027465
[truncated: 18,739 more rows]
