# Supplementary material for: Eed controls craniofacial osteoblast differentiation and mesenchymal proliferation from the neural crest
Source: eLife. 2025 Dec 2;13:RP100159. doi: 10.7554/eLife.100159 (PMC12671911; doi:10.7554/eLife.100159)
Supplement: Supplementary file 6. [file elife-100159-supp6.xlsx]

## Sheet: Supplementary_File_6
Supplementary File 6. Differential gene expression between genotypes in C0, C4, C5, and C7 from single-cell RNA sequencing.
gene	log_fc	padj
Cdkn2a	8.16957	0
Nrn1	2.87578	3.34061351322772e-187
Vax2	5.26601	2.81466495470474e-160
Skap2	2.52326	4.59953192241218e-120
Vax2os	5.58084	9.21519445940195e-120
Hoxa5	4.35283	2.48782782142731e-104
Zfp385b	1.87435	5.97656129891825e-101
Kcnc2	2.1723	2.98869785391741e-92
Ano3	2.14377	9.57700315561664e-92
En2	4.07336	8.91823739080466e-90
Zc3hav1	2.57481	1.61299755948132e-88
Cdkn2b	3.63857	2.45323017910004e-84
Gata4	6.61989	2.59897740251292e-83
Wipf3	1.95152	1.53855766723699e-79
Srd5a2	3.15776	1.59633886329547e-79
Hoxb6	5.13121	4.04487906922351e-79
Wt1os	5.7318	2.77208478758411e-78
Cntn4	-1.46065	2.91420266486291e-75
Gas6	1.81396	1.35015943086027e-73
Gm53	6.95301	9.36629670717846e-71
Col6a6	1.99654	2.40671010533964e-70
Eif3j2	3.03952	1.59683251220203e-67
Chrm2	1.99087	1.4449601713512e-66
Lhx9	2.56257	1.81164106839565e-66
Tmeff2	1.18253	5.61242799594281e-65
Chrm3	1.54135	2.42527189755554e-64
Hoxc13	9.12675	5.74583742063616e-64
Nefm	1.79978	1.27769209441941e-63
C130071C03Rik	1.96635	8.37282435643874e-63
Hoxb5	4.37853	4.80100519806105e-62
Gas7	1.26577	1.86720621684969e-61
Dock5	1.22817	4.50024987749122e-61
Eda2r	2.3215	1.69663383391979e-60
Enpp1	1.64055	2.2413452977895e-59
Htra1	1.50063	2.6846209191766e-57
Nxph4	2.00664	5.97466244753444e-56
Hcn1	1.81655	1.08592751118332e-55
Flt1	1.52684	4.78767851180796e-54
Agbl4	1.21394	6.08144698052393e-54
Hoxc6	9.32368	9.08053776622482e-52
Icam1	1.73947	1.34620092259387e-49
Cpm	1.18332	1.26527795126963e-48
Abi3bp	1.12375	2.64621617959366e-48
Kcnma1	1.27503	3.98882375552162e-48
Hoxc5	5.99596	5.51158100770761e-48
Shtn1	1.798	8.52799485517666e-48
Esr1	2.19782	1.29883928043968e-47
Ccn3	1.93064	2.19041505676915e-47
Sim1	1.74472	4.8969441742618e-45
Ar	1.91979	3.35786870901332e-44
Plagl1	0.936799	6.93882934180646e-44
Guca1a	1.97187	1.24204605641245e-43
Htr2c	2.47697	1.33670196917589e-43
Kitl	1.22433	1.41859235091564e-43
Nkx2-3	6.11423	9.85885991932677e-43
Slc17a6	2.88661	1.38714064722863e-42
Tcf24	1.73305	1.93219468658266e-42
Hoxc8	10.1577	1.02156409121523e-41
Fgf12	1.25802	1.86226265794288e-41
Hoxa7	5.44074	7.32987219161543e-41
Tmem117	1.1369	1.94315951955973e-40
Bmi1	1.15378	1.99618967009623e-40
Tec	1.46551	4.79901225499096e-40
Lncpint	1.38662	1.02372833130001e-39
Nkx6-1	2.79143	1.22490603341117e-39
Hspb1	1.58821	1.93496244137181e-39
Grin2b	1.06248	1.93496244137181e-39
Hoxa3	3.63378	3.35869137961754e-39
Col14a1	1.15727	4.08968370626923e-39
Tox2	1.67397	4.59820806787611e-39
Nefl	1.37922	7.23099454790068e-39
Egfl6	0.840949	1.23473795342525e-38
Adgrg2	1.34151	9.12179329793962e-38
Cpa6	1.44162	2.48394805584705e-37
Adcyap1	2.35452	2.56567316507108e-37
Prmt8	2.09173	6.2995115244682e-37
Hoxa9	9.57037	7.2681203067805e-37
Sox6	-0.833455	2.72516512948612e-36
En1	1.5829	2.99798423992577e-36
Esrrg	1.24262	4.3305330101887e-36
Gata6	1.65267	5.63826165914596e-36
Atp8b1	1.07446	1.1869651192286e-35
Pmaip1	1.28291	1.38274023389885e-35
Rerg	0.896065	8.60090021643402e-35
Minar1	2.36117	1.2169851010594e-34
She	2.18144	1.34682762185386e-34
Tmcc3	1.07494	1.88379977929089e-34
Gm14964	2.236	2.12870534114871e-34
Piezo2	0.951044	2.82782730682604e-34
Gm13944	1.92549	3.70340813878064e-34
Gm12610	4.1064	5.82320894519831e-34
Slc24a4	1.45251	1.14936466853816e-33
Lgi1	1.7709	1.80601995413396e-33
Cdkn2c	1.77126	2.38996684375224e-33
Hoxb2	1.81148	3.13799938887456e-33
Pax2	3.43007	4.83275795744483e-33
3110099E03Rik	-1.92792	5.55158238187759e-33
E030030I06Rik	1.17309	6.95698828692577e-33
Lmx1a	1.4647	1.01489748205162e-32
Sez6l	1.58038	1.19310333925852e-32
Trank1	1.8404	1.80126662100922e-32
Dmrta2	1.88074	2.11924145979424e-32
Hlx	2.7658	6.63433849072344e-32
Tbx4	1.80895	1.12930856012273e-31
Dock9	1.09182	3.88057401723461e-31
Sorcs1	0.889257	5.3991107445936e-31
Gm12606	3.78598	8.68678458326714e-31
Cd55	1.44581	9.22702049234674e-31
Npy	1.66156	4.08452706656782e-30
Gas2	0.948088	4.46151744141893e-30
Meox1	1.15025	7.02839427941878e-30
Otud7a	1.5345	1.0666696958156e-29
Wt1	5.53791	2.65239958461079e-29
Gpm6b	0.803439	2.86343500933441e-29
Ddx43	1.84858	2.96082094141757e-29
Gm43050	4.1949	8.86015157576766e-29
Gabrg3	1.2683	1.85152839053098e-28
Sqor	2.39703	1.96144026821447e-28
CJ186046Rik	-1.09784	2.82330368604008e-28
Sfmbt2	0.95951	3.46845082414342e-28
Igfbp5	0.70415	4.55637369286045e-28
Filip1	1.04273	4.56081505577798e-28
Dock10	0.826012	5.91848122091354e-28
Hoxa10	11.6445	1.35753236691168e-27
Hoxb9	7.54419	1.63339181474038e-27
Npas2	1.27119	2.816625203821e-27
Cpeb1	1.79268	3.48362627663557e-27
Bst2	1.28763	5.42326118138757e-27
Kcnj8	1.91435	5.58965515601032e-27
Pcdh15	-0.937165	6.60391175006503e-27
Nos1ap	0.998379	9.64554254482187e-27
A2m	2.11752	9.66726304522549e-27
Pcp4	1.15123	9.73606745021059e-27
Ggta1	1.04685	1.03068141045745e-26
Dcc	0.857676	1.19736106440182e-26
Cdh12	-0.951077	1.48697421547127e-26
Plcl1	0.967328	2.23605078770389e-26
Pamr1	1.06404	2.35487419267411e-26
Ebf2	0.800103	2.6199466198282e-26
Ly6h	1.13257	2.9384903139091e-26
Cdh3	1.08407	8.05440284852402e-26
Tcea3	1.20058	8.51418229599985e-26
Slc24a2	0.961097	8.77855019512642e-26
Tap2	2.22867	1.07605860268026e-25
Hoxc10	12.8976	1.45568842072233e-25
Klk8	1.31971	2.27376887499401e-25
Angptl1	0.956333	3.22188321809473e-25
Hoxa13	9.12267	3.95383175924365e-25
Cadm1	-0.717119	4.20949168331164e-25
Tbr1	1.9164	1.26938231188103e-24
Cldn3	2.69445	2.37569033277695e-24
Sgk3	0.717721	3.75990709187203e-24
Itga6	0.860539	3.85452984774326e-24
Cap2	0.770056	3.85854631041332e-24
Zmat3	0.865149	4.14416816046759e-24
Sp7	-1.48257	5.93125785784364e-24
Hoxc11	12.5123	6.16599524497845e-24
Gem	0.870596	6.4509607537889e-24
Hpse2	-0.819616	7.96792752964373e-24
C1qtnf4	0.86588	8.86549011941844e-24
4930447C04Rik	0.936857	1.1452728661824e-23
Trhde	0.914492	1.93946300008614e-23
Fstl4	1.34281	2.27564753770392e-23
Ttc6	1.79943	2.27744576694806e-23
Fndc5	0.879579	2.72704283052689e-23
Arhgap26	0.939558	3.06793372504573e-23
Ccdc141	0.778194	3.50490217003185e-23
Otx2	2.33035	4.00954340054319e-23
Prdm6	1.16654	4.24673827944361e-23
Hoxc12	12.2524	4.91408955058533e-23
Rasgrf1	1.79459	5.57104819210871e-23
Thy1	1.23364	6.21311582489663e-23
Nrip3	1.29528	6.41513223521844e-23
Otx1	2.13045	6.73706905363634e-23
Tmem158	1.16834	1.02708068790982e-22
C1qtnf3	1.33578	1.28026939507263e-22
Kcns3	1.70719	1.30848921897042e-22
Gm49708	-0.9752	1.69553003896578e-22
Scara5	1.03855	2.24764768819859e-22
Hoxd13	12.0769	2.41137207889384e-22
Abca9	0.874932	2.49388906516711e-22
Eln	0.893049	2.65056553116698e-22
Hoxb13	12.0485	2.78274723937516e-22
Hoxb5os	5.00467	2.96485730565528e-22
Prss16	3.6994	3.1050985096672e-22
Gm10556	3.78174	3.61065431259045e-22
Frzb	-1.26418	3.76410561634989e-22
Lrfn2	1.07662	4.29567831500162e-22
Hoxd10	6.83116	6.84693127864428e-22
Hoxc9	10.346	7.46083506944484e-22
Rnf213	1.22354	7.6067177497334e-22
Gfra3	1.60575	8.67224905675741e-22
Mtcl1	0.792657	1.04122787658288e-21
Kctd12	0.640708	1.13780930585204e-21
2310002F09Rik	1.4103	1.1836550812812e-21
Abcc9	1.17349	1.28719081628892e-21
Csrnp3	0.738048	1.29486912290048e-21
S100a16	1.6824	1.29571085928302e-21
Fam129a	0.995687	1.46137802175976e-21
Itgb8	-0.715354	1.50450634980421e-21
Svil	0.720369	1.65016940490534e-21
Col5a3	1.63815	1.91660418793114e-21
Hoxc4	4.99088	2.29841870087226e-21
Vcam1	0.842702	2.49177367892073e-21
Hoxa11os	11.7515	4.1233176316942e-21
Snorc	1.95638	5.17536362061718e-21
Tnfaip8l3	2.06337	5.91607775766357e-21
Igfbp6	1.41181	6.30958972347617e-21
Npdc1	0.839008	6.89620085281233e-21
Casz1	1.00191	7.1919794725559e-21
4930438E09Rik	0.845372	8.55737368388755e-21
Lsp1	0.888151	8.59031252079269e-21
Ntrk3	0.923269	1.00473592007068e-20
Six3	2.28519	1.03189062286872e-20
Agtr2	0.90603	1.14836854568586e-20
Kctd16	0.908618	1.24668128356129e-20
Slc14a1	1.61447	1.29646227180292e-20
Hoxd11	10.0482	1.32287966218262e-20
Alpl	-0.914313	1.99882749685023e-20
Pax3	-0.90965	2.10354705102459e-20
Rims2	1.06112	3.74239258530048e-20
Chl1	1.49004	5.50566509218685e-20
Rtl4	0.792102	6.73643349195632e-20
Slc7a10	1.86522	8.51494849479812e-20
Igfbp3	0.809536	8.81671148007902e-20
Camk1d	0.817437	8.85757135564565e-20
Prdm8	2.34006	9.2498813232497e-20
Foxg1	1.70333	1.31148739707123e-19
Negr1	-0.655086	1.49690953110943e-19
Dmrt3	3.47119	1.60572984906875e-19
Tmem150c	1.30905	2.6249747958864e-19
Vegfd	0.970515	2.99294974011892e-19
Itih5	0.902768	3.02816443138342e-19
Gm12609	5.02419	3.41973924986334e-19
Tbx1	1.32524	5.01077964490121e-19
Dmc1	0.868473	5.87413752018088e-19
Sult4a1	1.46627	6.72023732660656e-19
2810049E08Rik	4.45065	6.85774432383506e-19
Egfr	0.744133	8.20583692405685e-19
Tap1	1.55816	1.23030023891167e-18
Nxnl2	1.14902	1.23030023891167e-18
Fgf14	0.665585	1.58239116880332e-18
Usp44	1.5152	2.57322145739907e-18
1010001N08Rik	2.09416	2.65574889688944e-18
Kcnn3	0.901785	2.67824985935136e-18
Ptprn	2.18423	3.34428791892636e-18
Rhoj	0.8357	3.66265924656674e-18
Tmem132d	-0.823169	4.30352844647471e-18
Col3a1	0.591173	6.13425458301392e-18
Nr2f1	-0.612013	8.61101984428279e-18
Tmem178	1.04006	8.66662004471644e-18
Zic1	0.947498	9.41867371364986e-18
Entpd2	2.72178	1.01479742774367e-17
Selenop	0.770974	1.23450003010116e-17
Rassf2	1.30313	1.33158283626286e-17
Hoxb8	2.79871	1.36705373511178e-17
Alx4	-0.810812	2.66585753087199e-17
Nmnat2	0.989977	3.01979098618584e-17
Il20ra	2.30444	3.4014857444797e-17
Fabp4	2.39875	3.4742679009721e-17
Zdbf2	0.723269	4.04083155111847e-17
Nckap5	0.649893	4.33064675271676e-17
Barx2	2.076	6.5295265969087e-17
Slc16a10	0.957929	8.0950105682387e-17
Nhs	0.670375	9.57200722883262e-17
Ccdc3	0.977172	1.01932793419073e-16
Thsd7a	0.615938	1.19353823160362e-16
Pappa2	0.854762	1.37923481566341e-16
Gabrb3	0.969449	1.58175851256435e-16
Dmrt2	1.64635	1.72193633400535e-16
Man2a1	0.581072	1.93996797959224e-16
3110039M20Rik	1.71531	2.17133718195695e-16
Il1rl2	0.988953	2.21302744855336e-16
Msx1	-1.03293	2.36245510451325e-16
Cav1	1.03158	2.39687175860307e-16
Syt13	1.20317	2.76456216550411e-16
Cacna1e	0.769766	3.18265547925129e-16
Pdgfd	0.724831	4.74589420974555e-16
Alx1	-0.902101	5.27011917246834e-16
Ucp2	0.766427	5.53848664812504e-16
Clu	0.977476	6.75479489202219e-16
Gstt3	1.29911	6.90863629413094e-16
Gpr88	1.43842	7.03874256306835e-16
Bcl2l11	0.596328	8.82532959644716e-16
Ifitm5	-1.65809	1.01124013847344e-15
Rbmxl2	4.85522	1.03622777098323e-15
Cystm1	1.02889	1.06167468825415e-15
Them7	1.32559	1.0987044155289e-15
Fmo1	0.870374	1.10639605197254e-15
Hoxa11	10.1742	1.11141744965055e-15
Tfpi	0.656993	1.22778254008655e-15
Celf2	0.566265	1.39330457338863e-15
Hoxb7	5.93048	1.48008646739517e-15
Htra3	1.20292	1.53812451142163e-15
Sorcs3	0.602756	1.63994413388059e-15
Shfl	2.01766	1.63994413388059e-15
Aldh1a2	-0.904101	1.88989313206562e-15
Lhfp	0.587808	2.12054458468287e-15
Dchs2	0.697051	2.25460778080404e-15
Fxyd1	0.943613	2.97460214784389e-15
Krt1	1.07723	3.7644586224998e-15
Igf2r	0.55752	4.42841755704581e-15
Hoxd9	1.96144	4.94309662238147e-15
Prrx1	-0.510445	5.8689187449478e-15
Ajap1	1.26704	5.93985979766658e-15
Islr	0.663346	6.37853569436617e-15
Adamts9	0.602563	6.39838223256962e-15
Isl1	3.59717	6.87147132151996e-15
Rgs7bp	0.894593	6.94115865939465e-15
Loxl1	0.629812	7.31943916643751e-15
Fgf2	0.918982	8.3151644026075e-15
Fmod	1.0809	8.34687983033875e-15
Irak3	1.03984	8.34687983033875e-15
Nfasc	1.12641	1.07085737932423e-14
Csgalnact1	0.580298	1.2338460739656e-14
Lmo7	0.679911	1.32103521546019e-14
Six2	-0.687336	1.32103521546019e-14
Nkain4	0.818837	1.37307390460819e-14
Mxra8	0.63643	1.50413968204297e-14
Epha4	-0.706522	1.5890860355166e-14
Gm11536	2.57193	1.61212594629482e-14
Rbm46	0.759865	1.86586730420299e-14
Man1a	0.64585	2.14504592733178e-14
Bhlhe41	1.33099	2.17603899874455e-14
Cxcl16	1.49728	2.20948246855541e-14
Spock1	-0.888405	2.20948246855541e-14
Tbx20	1.89703	2.35548728384777e-14
Atp1b1	0.862606	2.39319913314888e-14
Dmrt1	2.62808	2.75152512562863e-14
Zfpm2	0.516152	2.75152512562863e-14
Panx3	-1.77232	2.93287782793998e-14
Gm49144	2.24208	4.00819157970186e-14
Itga1	0.685604	4.26083844621908e-14
Tmem178b	0.874955	4.37820580861323e-14
Carmn	-0.89592	4.49176113000953e-14
Fbxl7	-0.505855	4.49176113000953e-14
Ccng1	0.741522	5.65935247176559e-14
Epha3	-0.52273	6.20164505079208e-14
Lhx8	-0.700567	6.84051407235873e-14
Tlx1	3.93052	7.95708964487344e-14
Pax6	1.30691	8.29300137926519e-14
Foxa1	4.42784	8.55412761501947e-14
3100003L05Rik	2.35901	8.80255374689342e-14
Gm2115	1.07313	9.2645967838868e-14
Col19a1	1.16515	9.42923783254e-14
Rbm24	0.975923	9.57560092599077e-14
Kcna1	1.09405	1.12466367675969e-13
Pianp	1.0492	1.13504941956941e-13
Man2b2	1.16877	1.15631992225015e-13
Procr	1.53943	1.19802752666747e-13
Pdzrn4	-0.748682	1.25701910834523e-13
Cep85l	0.523937	1.32893342856714e-13
Tshz2	0.781944	1.38915885397554e-13
Smoc2	-0.517659	1.43683555928851e-13
Lgi2	0.800104	1.57514513826716e-13
Agtr1a	1.00283	1.83324642983825e-13
Mfap5	1.05272	1.8486738743893e-13
Hotairm1	1.37909	1.97442855111536e-13
Igf1	0.54329	2.10221076056447e-13
Adam33	0.818274	2.16398920344265e-13
Hoxa4	3.69771	2.21482075415353e-13
Fxyd2	1.03426	2.28731975861982e-13
Hspa4l	0.686803	2.28787120932443e-13
Tcf21	3.66913	2.55163685125883e-13
Ifnlr1	1.47952	2.70675267570799e-13
Sox4	-0.491559	2.72346552959416e-13
Arhgap20	0.761172	2.89482330163885e-13
Hoxa6	5.21155	2.90115565339932e-13
Lrmda	0.70372	3.16622371975779e-13
Stox2	0.614415	3.18060982127585e-13
Tcfl5	0.877921	3.35433166760008e-13
Fgf7	0.718957	3.55071787699508e-13
Gpr176	0.937787	3.57424410817576e-13
Mcc	0.583443	4.10961228870319e-13
Cited1	1.00613	4.26469707081924e-13
Cyp1b1	1.09375	4.29831089490992e-13
Postn	0.64149	4.51332862338716e-13
Dpt	1.44763	4.5487591017023e-13
Mitf	0.56512	4.55879997545723e-13
4933413L06Rik	1.91032	4.56552659943347e-13
C1qtnf2	0.994603	4.94633165400831e-13
Ndst4	1.37267	5.03787669522164e-13
Gm29478	1.17446	5.76816859885151e-13
Trp53inp1	0.612454	5.9670507357058e-13
Slc24a3	0.487995	6.02476865341563e-13
Ano5	1.24208	6.84153292446046e-13
Ctnnd2	0.553971	7.51624941351714e-13
Pwwp3b	0.565297	7.51624941351714e-13
Rasl10a	1.54636	7.87936688353339e-13
Mapk10	0.677823	7.95500822534755e-13
Cldn11	0.810338	8.01899428392218e-13
Phlda2	0.991428	8.44962997502762e-13
Arhgap24	-0.463578	9.679434819311e-13
Inhbb	1.11114	1.0167331228489e-12
Mast4	0.567454	1.17498514819053e-12
Smpd3	-0.884855	1.29267632618254e-12
Gm49959	0.622665	1.48498729206975e-12
Sgcb	0.615846	1.5511569496616e-12
Gm28320	1.24273	2.04216923973353e-12
Aard	1.01884	2.20304794493503e-12
Glp2r	1.29728	2.32212570133611e-12
Junb	0.605979	2.3871253419669e-12
Hebp1	0.70692	2.69343596080674e-12
9330158H04Rik	2.20323	2.7487490634424e-12
Sgcz	-0.877225	2.87466495442213e-12
Il1rapl1	-0.493317	3.08231309150606e-12
Peli2	0.504459	3.48260518532578e-12
Kif5c	-0.608111	3.50738893002171e-12
Crabp1	0.728113	3.62003350145813e-12
Gm28175	-1.05177	3.94161847989315e-12
Phactr2	0.55127	4.74499083571208e-12
Sfrp4	0.88055	4.78216871842486e-12
Hoxd3os1	1.18296	4.82126839984259e-12
Ccn4	0.566082	5.0733259309508e-12
Dcn	0.776979	5.10417901449601e-12
Ppm1e	0.53303	5.10417901449601e-12
Pip5k1b	0.731899	5.80976867385571e-12
Zic2	0.912138	5.81760625438975e-12
Smim1	0.962684	6.77610546114907e-12
Trpm5	0.9533	6.78532652291033e-12
Nptx2	1.3033	6.82075170989323e-12
Plekhg3	0.704857	7.01926068198614e-12
Ren1	1.96659	7.77076669524331e-12
Fuca2	0.765618	8.34711371088834e-12
Pax1	0.585179	8.65182544542818e-12
Bhlhe22	1.54118	8.88466064027084e-12
Fam155a	0.65225	1.02788990101682e-11
Nr4a2	0.45833	1.0614403836289e-11
Krt18	1.19845	1.16741566548431e-11
Sox2	0.969656	1.26277362000008e-11
Arap3	1.25418	1.31102546101152e-11
Hspb8	1.03083	1.31187031274317e-11
Prkcb	0.761384	1.42868701341235e-11
Ecrg4	1.62575	1.46023159085657e-11
Sult5a1	0.660987	1.72442251738518e-11
Cebpd	0.736531	1.868871856393e-11
Lbhd2	1.45419	2.0234115973814e-11
Fign	-0.590067	2.11790870424315e-11
Glis3	0.473305	2.18724258075019e-11
Snhg11	0.689744	2.22503062906411e-11
Steap4	1.49864	2.27189539948458e-11
A4galt	1.30376	2.37898941216902e-11
Calml4	1.10537	2.43542297883177e-11
Rin3	0.741244	2.76899244353025e-11
Anxa4	0.670551	2.78353047545577e-11
Esx1	3.24431	3.09733617177836e-11
Ass1	1.00739	3.19438656185916e-11
Medag	1.13837	3.20053663177011e-11
Tgfbr2	0.544387	3.20602199442688e-11
Mex3a	-0.493723	3.33926397651009e-11
F13a1	1.63912	3.90400744848294e-11
Dnm3os	-0.701353	4.21519720704494e-11
Sntg2	0.811255	4.24785888364568e-11
Bcl11a	-0.581643	4.3861582683535e-11
Cldn7	1.525	4.82661113644161e-11
Elavl2	0.676678	5.57289122481783e-11
Cxcl10	1.89723	5.84611751665325e-11
Gng11	0.645525	6.00090011597124e-11
Hotair	8.53027	6.08388628285915e-11
Pdpn	0.677197	8.30047445530388e-11
Gm14636	1.16809	9.1741961342855e-11
Kcne4	0.951646	9.38624371997166e-11
Ccbe1	0.630373	9.53104634389251e-11
Rab27b	0.924746	1.1200841190487e-10
Pura	0.518865	1.1322377828165e-10
Ccno	1.46043	1.20910090269489e-10
Adgrv1	0.798592	1.22242808873118e-10
Mab21l2	-0.666555	1.22651501309508e-10
Tmem100	0.573978	1.2576860203623e-10
Rcan1	0.830195	1.49237629290339e-10
H2-Ab1	2.13885	1.53373554662286e-10
March3	0.506028	1.56360590131371e-10
Hspa2	0.880631	1.59934026890359e-10
Crlf1	-0.567502	1.64461872985466e-10
Airn	0.582461	1.65239817387462e-10
Slitrk2	1.25273	1.68717539658071e-10
Cyp26b1	-0.634637	1.71722025848184e-10
Gm15398	-0.878728	1.73748611206163e-10
Shc3	0.738628	1.80592546449514e-10
Trnp1	0.774349	1.88386661989811e-10
Reps2	0.665201	2.00257241061316e-10
Ctsh	0.824452	2.03450748163335e-10
Gabrb1	0.682469	2.03815735401379e-10
Runx2	-0.492404	2.09490170967589e-10
Gm13067	2.85361	2.11521095744689e-10
Disp1	0.629464	2.13277009890991e-10
Prss35	0.662608	2.13277009890991e-10
Chrd	0.859452	2.28825136199801e-10
Syn2	1.05603	2.3721742514674e-10
Jph4	0.795679	2.43001916719658e-10
Rmst	0.732736	2.43343897380368e-10
Iigp1	1.40896	2.53616849451235e-10
Igfbp2	0.613398	2.57732428367422e-10
Catsperz	2.36092	2.77345765180221e-10
Pde8b	0.655091	2.80281470638424e-10
Trim9	0.862149	2.89663445948387e-10
Bag3	0.619319	2.9828340459568e-10
Deptor	0.721085	3.23061504442022e-10
Kcng2	0.859992	3.38260699284851e-10
Arl4c	0.818733	3.81279728930713e-10
Pparg	1.31957	3.88335290434703e-10
Sox11	-0.560535	4.21677125239629e-10
Galntl6	-0.657597	4.40414657960126e-10
Gm13986	-0.755641	4.71879102850098e-10
Tacr1	1.08597	5.510656751304e-10
Meg3	0.418774	6.13580078720193e-10
Nr2f2	-0.580265	6.27377106794038e-10
Hoxaas3	2.52968	6.44380784540783e-10
Ifi27	0.739815	6.68796613475886e-10
Selenov	1.91947	6.7565470776888e-10
Tnrc18	-0.439429	6.77004745250931e-10
Mgat4a	0.575666	7.08274338875781e-10
Satb2	-0.635621	7.12465272213484e-10
Cgas	0.982703	7.44147689722368e-10
Gm266	0.833953	8.43005019338316e-10
Kcnh5	0.880508	8.57512016863878e-10
Mest	0.496602	8.69052463748637e-10
Wfdc2	0.671032	8.80409279411735e-10
Zic3	0.898745	8.94481995674943e-10
Dlk1	0.625137	8.94481995674943e-10
Bicc1	0.467098	9.16643335971695e-10
Prox1	0.976842	9.56413879810697e-10
Met	0.680215	9.61971958293929e-10
Gm29683	-0.811394	9.69180121155605e-10
Bhlhe40	0.793632	1.00164610281491e-09
Gm15675	1.34703	1.01630165852689e-09
2610016A17Rik	2.54711	1.0164800008415e-09
Ablim1	0.637788	1.02873920199963e-09
Arfgef3	0.684964	1.03562159575271e-09
Map3k8	1.13486	1.03601535060554e-09
Raet1e	1.12889	1.03601535060554e-09
Wnt4	0.575295	1.05807793977815e-09
March1	1.01479	1.05807793977815e-09
Cyth3	0.530877	1.07852108107002e-09
Ube2ql1	0.804378	1.10255980653697e-09
Mfap4	0.468916	1.10255980653697e-09
Zfp536	0.560877	1.18377880218074e-09
St6gal1	-0.476487	1.21184415349508e-09
Pmp22	0.478771	1.26237745800146e-09
Gm49890	1.44841	1.26237745800146e-09
Tbx22	-1.4309	1.3105284751993e-09
Il1r1	0.745381	1.33868487362626e-09
Elfn1	1.04575	1.34866409940849e-09
Gm28876	2.43131	1.52563472481839e-09
1700021F13Rik	5.35935	1.52611319892275e-09
Nt5e	0.732132	1.60610422631107e-09
Rbpms	0.41201	1.64806192322234e-09
Olfm2	0.591274	1.74296400770176e-09
Asxl3	-0.428321	1.75051086705272e-09
Cdr1os	0.542232	2.15447270033646e-09
Clrn1	-1.79254	2.1985609438136e-09
Runx1	0.505322	2.20530839116355e-09
Galnt13	-0.571524	2.20855950132179e-09
Apobec3	0.917185	2.32549986836293e-09
Lrrn2	0.915566	2.34370413630157e-09
Slc16a9	0.777651	2.34384316805959e-09
Ccdc149	0.979943	2.3832137391278e-09
Slc7a14	1.72322	2.40771614759799e-09
Osbpl3	0.492659	2.44127106351456e-09
Npr3	0.687267	2.53715148944645e-09
Lmo2	1.39274	2.74548167840541e-09
Nkain2	-0.55394	2.76806272977309e-09
Gm15050	1.0113	2.77388971252748e-09
Osmr	1.20253	3.02904346876632e-09
Dlx1as	-0.724763	3.15681795735833e-09
Col4a5	0.502619	3.17097893106054e-09
Elf4	0.522134	3.33947133344823e-09
A830012C17Rik	0.887064	3.34928524158915e-09
Pou3f3	-0.585879	3.55170076583655e-09
Rarres2	0.866066	3.62474571978411e-09
Adm	1.25369	3.69571952413802e-09
Dusp14	0.633661	3.71345012278749e-09
Txk	1.04191	3.81910855691306e-09
Serpinb1a	1.07274	3.8471399089851e-09
Atf3	0.86199	4.11643506887433e-09
Sele	2.82001	4.1450317351283e-09
Spata18	2.055	4.15764643026207e-09
Kdr	1.02022	4.26285216626976e-09
Trbc2	2.16248	4.5048054800031e-09
Rragd	0.592446	4.56793794558982e-09
Xylt1	0.486191	5.06424014123701e-09
Nol4	0.579342	5.45291830298023e-09
Ecscr	1.13846	5.45924710081517e-09
Nrxn2	0.829769	5.45924710081517e-09
Efhb	0.592918	5.68470057545428e-09
Parp9	1.01212	5.68470057545428e-09
Ltbp4	0.538158	5.68756399693478e-09
Rai2	0.868842	5.71367725820683e-09
Gm34517	-0.81302	5.94821995589401e-09
Slc13a5	-1.78832	6.25262717882786e-09
Ccser1	0.487489	6.28949530646899e-09
Hoxd4	1.50349	6.51907843852935e-09
Fosb	0.730366	6.71786126347062e-09
Blnk	1.65252	6.88976531444221e-09
Nova2	1.01553	7.35577619100553e-09
Rassf8	0.605391	7.376080333431e-09
Aff1	0.485354	7.37903141473348e-09
Gpc6	-0.405408	7.45946897554301e-09
Fam13c	-0.541395	8.0829956129893e-09
Tal1	1.74934	8.64113656826354e-09
Gprin3	-0.893234	8.73165381838547e-09
Pcdh11x	-0.566456	8.79814735594398e-09
Stx3	0.825066	9.06929929424816e-09
Rnase4	0.568906	9.38715000155176e-09
Dleu2	0.426035	9.48489654450747e-09
Matn2	0.485641	9.92570729873336e-09
Ezr	0.650333	1.00273877929722e-08
Fblim1	-0.568355	1.0055525554306e-08
Vgll2	1.53479	1.01199065436132e-08
Caln1	-0.541431	1.01855302301571e-08
Myo16	0.563607	1.06741725258995e-08
Psmb8	3.20368	1.08929675558731e-08
Cds1	0.701425	1.19442483125879e-08
Amph	0.798624	1.20485670463587e-08
Tiparp	0.46723	1.22945945056032e-08
Col8a2	0.50039	1.24346935564587e-08
Gm49958	0.6949	1.34061072390481e-08
Kcnh1	0.823032	1.45369845235727e-08
Acvr2b	-0.593617	1.49021203476892e-08
Kank1	0.684379	1.55061864094205e-08
Foxl2	-0.794201	1.55417051209157e-08
Cacna1a	0.542558	1.63311467037179e-08
Bcl11b	-0.498766	1.67894193878614e-08
Kctd15	-0.593498	1.68024561581783e-08
Selenom	0.516921	1.69123367334348e-08
Grp	1.15524	1.69151392409315e-08
Igsf21	1.67669	1.71068331290215e-08
B4galnt1	0.947401	1.81522233442563e-08
Plce1	0.491942	1.8729415847503e-08
Fam122b	0.686071	1.91971751404296e-08
Cck	1.37107	1.93606372069319e-08
Lhfpl1	1.27247	1.95872300646167e-08
Hoxd12	7.58662	1.98367299454416e-08
Stk32b	0.512891	2.07674294920602e-08
Gm12811	0.915926	2.07864731552576e-08
St6gal2	-0.911039	2.09077512751209e-08
Mpzl2	0.692526	2.10376467030124e-08
Trpc5	0.614173	2.17658721330411e-08
Mtf2	-0.368378	2.20136138653293e-08
Zfp800	0.53483	2.2440802565299e-08
Anxa11	0.654031	2.25607683878638e-08
Inhba	0.527165	2.29669955859073e-08
Soga3	0.796643	2.29669955859073e-08
6530403H02Rik	0.969432	2.29669955859073e-08
Klf2	0.647837	2.42686668629089e-08
Clip2	-0.635329	2.43708139680906e-08
Kdelr3	0.432815	2.48944248097807e-08
4921518K17Rik	2.29785	2.57070673629479e-08
Myadm	0.604194	2.60393396332971e-08
Scrn1	0.646063	2.81911414881607e-08
Gstt2	0.780335	2.85438543884757e-08
Rbp4	2.07504	2.98464220775112e-08
Lrfn5	-0.562638	3.11470149954929e-08
Pld1	0.657876	3.23010798370373e-08
Bok	-0.628941	3.26910490303632e-08
9630013D21Rik	1.36322	3.44434295501904e-08
Smc2	-0.375892	3.56364355848014e-08
Scube2	0.592729	3.6546416708947e-08
Plxnc1	0.527785	3.74180925012219e-08
Matn3	0.826823	3.82197854083792e-08
Tbx5	3.86823	3.84022999458373e-08
Ogn	0.492089	4.02626777456898e-08
Scn1b	0.689286	4.18319708800806e-08
Cd40	1.27827	4.20071793460292e-08
Nr3c2	0.564716	4.21290366481939e-08
Slc2a3	0.669314	4.21290366481939e-08
Plcb1	-0.37103	4.28338195368235e-08
Vsx2	1.45509	4.29363486369836e-08
F11r	0.984703	4.31570735527614e-08
St8sia6	1.10389	4.33983489778296e-08
Esrp1	1.8143	4.34303454661725e-08
Enkur	0.865962	4.48392282199524e-08
Mt2	1.92061	4.48392282199524e-08
Fut9	0.74834	4.52402274499341e-08
Lrp2	1.42983	4.66475865317171e-08
Gm49417	0.654509	4.68917939449021e-08
Rab40b	0.567119	4.77075559224121e-08
Cemip	0.63529	4.86247071382352e-08
S100a13	0.609663	4.87087542424433e-08
Lbx1	2.86361	4.89470888073554e-08
Cenpe	-0.383234	4.9071691110234e-08
Fndc1	0.594945	4.91314694931277e-08
Celf5	0.86892	5.17354421717233e-08
Npnt	-0.498585	5.20251150571429e-08
Ralgps2	-0.414937	5.2026935890625e-08
Aspn	0.509458	5.24847437464209e-08
Klf14	1.03949	5.34464657638807e-08
Cnih3	1.13977	5.39235033359053e-08
Lrrc4b	0.81454	5.39602732806941e-08
Tmod1	0.802888	5.39602732806941e-08
Bcl6	0.487644	5.43138347901036e-08
Cox6b2	0.730076	5.43138347901036e-08
Nr6a1	0.451392	5.45118501940237e-08
Penk	0.61606	5.66857427077788e-08
Jdp2	0.525884	5.85387142270706e-08
Itm2a	0.605245	6.01071049120471e-08
Wnt2	0.727018	6.08094353584379e-08
Usp2	0.461285	6.09161859659035e-08
5330439M10Rik	4.08583	6.49341644525523e-08
Fgd5	0.829099	6.53377866800629e-08
Grin2d	0.727512	6.70215620103408e-08
Nrg3	-0.599432	6.93995966119453e-08
Clic6	1.10273	7.01213945156493e-08
Rcc2	-0.460716	7.35852024959107e-08
Sbk1	-0.595309	7.63850238972449e-08
Plpp4	1.13088	8.11578028177669e-08
Fbxo2	1.04826	8.28025516743243e-08
St8sia2	-0.452842	8.33279926495519e-08
Dpp6	0.651328	8.53976431093995e-08
Dglucy	1.02548	8.97427566245898e-08
Ric3	0.800828	9.19779526097748e-08
A630089N07Rik	-0.448427	9.7204623366538e-08
Rnf38	-0.387575	9.91940928426686e-08
Eya1	-0.518054	1.01543170935942e-07
Baiap2l1	0.473051	1.01936878509477e-07
Hspa12a	0.742507	1.01936878509477e-07
Irf6	1.08615	1.059542530429e-07
Slc25a21	0.877051	1.0948602752714e-07
Sall1	1.26954	1.14453140903303e-07
Ifitm3	0.756019	1.22023412001884e-07
Dach2	-0.472393	1.24497736984954e-07
Lrrk1	0.481439	1.24497736984954e-07
Car12	0.808122	1.29035501230188e-07
Meox2	0.454841	1.29610375671181e-07
Mid2	0.47124	1.30779440440021e-07
Pld5	0.51919	1.32001581057786e-07
Hand2os1	-0.623321	1.3391931469801e-07
Bmper	-0.456924	1.44918587522886e-07
Dclk2	-0.464184	1.46635311283686e-07
Hoxb3os	0.900309	1.47142270394905e-07
Ptk2b	1.43922	1.4861768636617e-07
Lox	0.493453	1.5023242403486e-07
Hottip	7.41499	1.54281586583404e-07
Rnd1	1.09168	1.56101213635896e-07
Slc41a2	0.619668	1.63119648397636e-07
Fndc3a	0.397832	1.63189881772015e-07
Naprt	1.01906	1.71193926180362e-07
Pde10a	0.639923	1.72769553030099e-07
Etv2	2.59312	1.75328331980268e-07
Pde8a	0.585159	1.76038417384271e-07
Slc50a1	0.440828	1.77171736898415e-07
Rps27rt	0.523822	1.77251039113495e-07
Cited2	-0.658863	1.78501315959595e-07
Gstt1	0.598166	1.81153363330553e-07
Gm2a	0.53983	1.83916944953188e-07
Hivep3	0.514629	1.9082680735531e-07
Angpt1	-0.497057	1.97315159243952e-07
Spag6	1.4547	1.99395430769917e-07
Dgkh	0.43346	2.01298034513892e-07
Igsf9	-0.76867	2.03231250542013e-07
Gm11290	1.16058	2.03231250542013e-07
Myo5b	1.02482	2.06551270318197e-07
Nell1	0.526136	2.08593582632136e-07
Zeb1	0.527735	2.09955094623529e-07
Hs3st4	0.708899	2.12104522074304e-07
Zic4	0.574016	2.12104522074304e-07
Dscaml1	1.19179	2.15334823418594e-07
Cnn2	-0.453794	2.15481675949102e-07
Stxbp6	0.410386	2.1820929127927e-07
Gm27017	0.689326	2.24210184746636e-07
Ptprn2	0.744809	2.25137328196889e-07
Gm49267	-0.430982	2.30159311557986e-07
4932438H23Rik	2.30723	2.38673136255936e-07
Asap2	-0.383891	2.39253945045644e-07
Ctsk	0.531906	2.50287206357353e-07
Slc22a23	0.502728	2.52753532491066e-07
Parp12	0.608092	2.54399501728046e-07
Trpc1	0.571766	2.61677244127551e-07
Col16a1	0.492508	2.62881425778789e-07
Dsp	1.12636	2.71045393703722e-07
Wnk4	0.740567	2.75885130386435e-07
Snx7	0.460365	2.7871101056437e-07
Sox5	-0.365641	3.01706144343187e-07
Fibin	0.431494	3.03170042731215e-07
Tbx18	0.567735	3.26962422725996e-07
Slc4a10	0.925175	3.26962422725996e-07
Camk4	0.409319	3.45223908384072e-07
9630028H03Rik	-0.535348	3.46121155343348e-07
Mcph1	-0.421212	3.49075948034505e-07
Col22a1	-1.13528	3.6565359137158e-07
Epas1	0.839868	3.84067742469964e-07
Pls3	-0.396469	3.87412844736351e-07
Dock4	-0.348403	3.91737680324464e-07
Otx2os1	1.42361	3.93839959190633e-07
Scube1	-0.425284	3.96466426201108e-07
Lhx6	-0.762902	3.96487847822292e-07
Serping1	0.518643	3.99921806164518e-07
Sgsm1	0.77637	4.05348360995505e-07
Slc35f3	0.953116	4.06895544656429e-07
Xpr1	0.400057	4.14366139219074e-07
Gm49439	-1.46045	4.15828444928726e-07
Knl1	-0.419633	4.16799183924127e-07
Ccdc158	0.827426	4.21825354390646e-07
Htr2a	0.858887	4.32080447066572e-07
P3h2	0.372807	4.32080447066572e-07
Cytl1	0.808957	4.32692214881494e-07
Kcnk1	0.504995	4.33212870806271e-07
Qrfpr	1.37845	4.38077739122688e-07
Gabrb2	-0.603155	4.56598302383043e-07
Dpysl3	0.453961	4.8111755882123e-07
Fxyd5	0.947976	4.82320439892626e-07
Cadm2	-0.406501	4.82906725373416e-07
Rnf17	0.862023	4.87038590254467e-07
Ptx3	0.511281	4.88803965829857e-07
Crybb3	0.988465	4.90597159158545e-07
Dlx3	-0.968363	5.00921304081417e-07
Mylk	-0.475128	5.20222112745427e-07
Sfpq	-0.336044	5.27467337991372e-07
Cemip2	0.39819	5.28882359932753e-07
Dlx1	-0.631436	5.28912780726444e-07
Gm32569	1.4572	5.34865342614731e-07
Rab20	1.14962	5.4995321775626e-07
Nkx2-2	2.67074	5.56117783554864e-07
Nr4a3	0.463077	5.57158812599199e-07
Zbtb7c	0.574834	5.79307372187466e-07
Gm11884	-0.953176	5.83905668062105e-07
Pced1b	0.50694	5.91790780859527e-07
Lum	0.538336	5.99677720000598e-07
9530026P05Rik	0.524768	6.30643283774303e-07
Hira	-0.35355	6.31606602922909e-07
Arntl	0.526312	6.39683985648827e-07
Ebf1	0.327782	6.49719036068632e-07
Gm20646	-0.663269	6.64832656010423e-07
Olfml3	0.438499	6.65386092060695e-07
Sp9	0.644865	6.65386092060695e-07
Tead2	-0.337061	6.85308566940777e-07
Apod	0.486391	7.07051061012373e-07
Gpr83	1.45644	7.17745578515106e-07
Limch1	0.427158	7.36359037642056e-07
Ahnak2	1.08875	7.43378861211461e-07
Cxcl5	1.4222	7.44593519080326e-07
Gm15414	0.59063	7.51954757955559e-07
Nedd9	0.483903	7.58957484908977e-07
Clec14a	0.928852	7.94622456895375e-07
9130024F11Rik	-0.734685	8.44861131097573e-07
Thbd	0.816241	8.69794514957153e-07
Hmx1	0.62453	8.70871755612566e-07
Baz1a	-0.43562	8.71541871290883e-07
Nptx1	1.08223	8.82917771179574e-07
Csmd1	0.45537	9.03139161403095e-07
Wdr86	-0.549478	9.14170182144059e-07
Sh3rf3	0.387366	9.14170182144059e-07
Tspan2	-0.452738	9.23635805801642e-07
Psmb9	1.48866	9.43311137975698e-07
Ppp2r2b	0.557354	9.66360856946398e-07
Ptn	0.513877	9.70795520059538e-07
Mgp	1.14015	1.00688831344588e-06
Egr3	0.84966	1.01056014015133e-06
Pxdc1	0.460994	1.01989829075528e-06
D830036C21Rik	0.932633	1.02235729464563e-06
Pakap.1	-0.342165	1.0229693221985e-06
Tmem238	0.700691	1.03213125942864e-06
Acot7	0.464675	1.05119903662097e-06
0610040J01Rik	0.716239	1.05660541663649e-06
Mms22l	-0.377461	1.08966352445789e-06
Cbr3	0.85146	1.11135016924667e-06
Smarcc1	-0.322176	1.12898656257372e-06
Pir	0.556654	1.13292669497071e-06
Bmp6	-0.52189	1.1530881829612e-06
Sinhcaf	-0.519638	1.1530881829612e-06
Nppc	0.641919	1.1530881829612e-06
Taok3	0.430334	1.164544781715e-06
Rgl1	0.406746	1.17281117091397e-06
Arrdc3	0.372673	1.18795937397416e-06
Fbxl19	-0.530277	1.19123717507275e-06
Stk17b	0.486698	1.19303131970723e-06
Dsg2	1.11223	1.26477421707206e-06
Zik1	-0.518462	1.26477421707206e-06
Tm4sf1	0.77554	1.26829379717706e-06
B3gnt2	0.490814	1.27583157438206e-06
Actn1	-0.387297	1.28693681736539e-06
Cers4	0.583873	1.28819165241695e-06
Kif3c	-0.458997	1.32986904669021e-06
Nptxr	0.662138	1.33132626148939e-06
Tafa1	0.501518	1.33831836058125e-06
Col6a3	0.493616	1.35778159982046e-06
Hoxb3	2.23458	1.3595792637724e-06
Sorl1	0.544688	1.36646499547712e-06
Prr5	0.524204	1.37771155880011e-06
Ppp1r1b	2.95399	1.37771155880011e-06
1700016P03Rik	0.681116	1.40083566174684e-06
Pbx1	-0.33239	1.42788512699582e-06
Prtg	-0.456361	1.44461884482769e-06
Hoxa1	2.47474	1.45187759282998e-06
Gm32647	0.839914	1.47225467270533e-06
Gca	1.11512	1.54851217787431e-06
Nrp2	-0.356926	1.62142903236032e-06
Chaf1a	-0.467494	1.70048650749598e-06
Adamts6	-0.334056	1.70738709489296e-06
Atp6v1b1	2.41197	1.73034915767688e-06
Masp1	0.770074	1.73483865303269e-06
Vps13a	0.404547	1.75911308427066e-06
Rgs10	0.575406	1.79794717260095e-06
Cnksr2	-0.419977	1.80883836122261e-06
Tent5a	0.382188	1.82443651766713e-06
Rgs9	0.60536	1.84197925428259e-06
Tfap2b	-0.478884	1.84959520847865e-06
Pak7	-0.639163	1.86521564402266e-06
Slc1a2	0.441455	1.88043466364406e-06
Matk	0.695811	1.88344620739513e-06
Cyba	0.434043	1.91510333968498e-06
Cntnap3	1.84542	1.9966523676024e-06
Tgfb3	0.418881	2.02901781817571e-06
Ccdc80	0.409532	2.035556740447e-06
Dhrs3	0.519542	2.07221806917433e-06
Abcc8	1.45313	2.07368205406331e-06
Frem1	-0.463372	2.07368205406331e-06
Tcp11l2	0.548067	2.07662543364299e-06
Evx2	5.093	2.10971781559545e-06
Des	0.930169	2.10971781559545e-06
Maged2	0.359099	2.17299420825084e-06
Dscam	0.90584	2.1757329470458e-06
Gm16251	2.39737	2.20500600471302e-06
Kalrn	-0.380849	2.24921973304334e-06
Nrg2	0.678973	2.30330923285895e-06
Cnpy1	2.03369	2.334736403196e-06
Gaa	0.442109	2.35667343370341e-06
Pear1	0.543717	2.38278946541535e-06
Astn2	0.350561	2.40555206719206e-06
Lgals3	1.06141	2.41510223677379e-06
Car3	-1.2406	2.42417068740443e-06
Gcnt4	1.08672	2.57753861514667e-06
Gm45847	0.628164	2.65137604681811e-06
Rel	0.467183	2.75797550111902e-06
Fat4	-0.387951	2.77392842145281e-06
Fam180a	1.1208	2.91742955302809e-06
Cntnap4	0.715506	2.94386323758229e-06
Slc26a7	0.761164	2.98878564333215e-06
Fam43a	0.833705	3.002795633108e-06
Fgf5	2.19448	3.00714541639202e-06
Zfp462	-0.396119	3.13310011377484e-06
Nap1l5	0.77072	3.13310011377484e-06
Arap2	0.742601	3.21761557577599e-06
Mlph	1.28711	3.26312468200363e-06
Htr7	0.876547	3.27114149893992e-06
Arhgef3	0.453711	3.27719395891013e-06
S100a6	0.595331	3.34525920697723e-06
L1td1	0.937865	3.40537193126063e-06
Ift140	-0.47913	3.42000101908411e-06
Fkbp14	0.425081	3.42087658974448e-06
Synj2	0.543251	3.45245068542477e-06
Vsir	1.36605	3.4884581583341e-06
Mlxipl	0.96985	3.5175080973225e-06
Psip1	-0.369734	3.52469043576595e-06
Gm48693	-0.534914	3.58058710978146e-06
Nkx2-5	4.17483	3.64565757843187e-06
Alox12	2.25197	3.65197729060008e-06
Mllt3	-0.452165	3.86826952598487e-06
Kif20b	-0.378573	3.89962211972319e-06
Fgd4	0.406338	4.03580383499725e-06
Ntrk2	0.422242	4.22178881984288e-06
Tmem173	0.818811	4.22178881984288e-06
Vkorc1	0.488679	4.32379962635602e-06
Prkch	0.453862	4.34247695813316e-06
Me2	-0.430023	4.34621394600927e-06
C130021I20Rik	0.751109	4.34644604445154e-06
Lefty1	0.844384	4.39941363459036e-06
Zfp664	-0.375294	4.40691105430385e-06
Hist1h2bj	-1.14199	4.56032474236933e-06
Atad5	-0.37952	4.59568860738848e-06
Cenpf	-0.415391	4.68064478273148e-06
Jcad	0.497651	4.74777343584208e-06
Ramp2	0.420299	4.84042549432452e-06
Syndig1	0.484799	4.90843249895608e-06
Lmnb1	-0.362255	4.9387191475771e-06
Sass6	-0.376591	5.04268814073948e-06
Ppp1r14a	0.731335	5.04793727712988e-06
Gm11266	0.686908	5.04793727712988e-06
Rarg	-0.418387	5.06724389863319e-06
Emp3	0.451847	5.35472986707401e-06
Arhgap11a	-0.493607	5.39334340216965e-06
2610318N02Rik	-0.625936	5.39916920913573e-06
Dll3	0.974219	5.45612036988604e-06
Spock2	0.551128	5.60006940280178e-06
Coq8b	0.472779	5.60470965679201e-06
Rab13	0.371563	5.63550674410894e-06
Mak	0.792269	5.74351973940313e-06
Ccdc30	0.638743	5.87527094764058e-06
Uba7	0.632556	5.87713247949254e-06
Socs3	0.412964	5.9334952536172e-06
Pitx2	0.558804	6.01489879961448e-06
2610027F03Rik	1.53143	6.01975070560711e-06
Ptgs1	0.665944	6.19922446930146e-06
Gstm2	0.572383	6.26553051209566e-06
Sh3rf1	-0.321631	6.26553051209566e-06
Kctd14	-1.11998	6.36309727325118e-06
Kmt5a	-0.365405	6.36838348510934e-06
Dgkk	0.768619	6.50990233827522e-06
Gm43647	3.02801	6.54707272751511e-06
Dipk2a	-0.414309	6.68093799645846e-06
Clec2g	-2.96277	6.70818535309031e-06
Tbx2	-0.419415	6.8737128884168e-06
Pcsk1n	0.982338	7.02952129906201e-06
Dnah5	1.44603	7.09030161783498e-06
A830082K12Rik	-0.394318	7.10947592018538e-06
Grm3	0.616042	7.18196775891229e-06
Paqr6	1.64931	7.48905687295847e-06
Klf12	-0.328813	7.61610787438782e-06
Ptpn13	0.348179	7.68147549665222e-06
Prg4	0.909765	7.73313830993437e-06
Dlx5	-0.53916	7.83834975867171e-06
Arhgef5	0.635117	7.88033250345426e-06
Dmbx1	1.35026	8.36904941464761e-06
Gins1	-0.447385	8.44698153456943e-06
Gpr27	0.432448	8.52106298283211e-06
Mmp28	1.06286	8.60864336355171e-06
Actn2	0.972818	8.71113093405518e-06
Perp	1.23802	8.97510995424455e-06
Gm40123	1.13946	9.13557667615058e-06
Fam81a	0.599561	9.17180537337766e-06
Egfros	0.686167	9.18223833127633e-06
Lmx1b	0.803447	9.20580445250822e-06
Blm	-0.42099	9.26249199730477e-06
Smarca2	0.320543	9.30676066045869e-06
Kcnk6	0.878012	9.43310038789844e-06
Rasa4	0.586896	9.50025739352756e-06
Lpar3	0.786686	9.62549015420574e-06
Egr4	1.21884	9.72302855084397e-06
Rnf128	0.621899	9.75256298769395e-06
Edil3	-0.378212	9.75256298769395e-06
Smc4	-0.341373	9.7674932808178e-06
Prdm1	0.801709	1.0146083936526e-05
Has2	0.511043	1.02442371376907e-05
Pcdhb19	-0.84931	1.02442371376907e-05
Tdrd7	0.533909	1.04619580296002e-05
Slc35d3	1.67061	1.06112140496127e-05
Gm26550	2.29663	1.07160410827228e-05
Cip2a	-0.427803	1.08260631153939e-05
Cast	0.33489	1.11835702659861e-05
Arpc1b	0.439097	1.12607955751815e-05
Hnrnpu	-0.306742	1.1368438469623e-05
Tspan5	0.418327	1.1378540007406e-05
Sgcd	0.386809	1.14284095880276e-05
Efhd1	0.782249	1.15412251084168e-05
Sin3a	-0.374608	1.18102365698574e-05
Gm49692	-0.524151	1.18619455977091e-05
Ldlrad4	0.356941	1.22003190006504e-05
Ankrd55	0.506533	1.23002202126951e-05
AI606473	-1.02761	1.2608571300758e-05
Astn1	-0.394328	1.27096484547229e-05
Anp32e	-0.37773	1.27233468741549e-05
Lipi	-2.96954	1.27610064329036e-05
Sptb	0.868729	1.27674372963317e-05
Aff3	-0.313576	1.28602396599983e-05
Rimkla	1.21504	1.29183935407929e-05
B230323A14Rik	2.63949	1.2927211596654e-05
Plekha6	0.587425	1.29463066469975e-05
Phlda1	0.572228	1.29464465877182e-05
Gm765	2.01435	1.29481699090481e-05
1700120O09Rik	0.693637	1.29606446608516e-05
Top2a	-0.380797	1.30804030142758e-05
Copz2	0.448433	1.32432405364398e-05
Foxe1	5.58318	1.33099505564103e-05
Hmgb3	-0.463607	1.33521414121792e-05
Serpina3g	2.71325	1.35199087239096e-05
Plxna2	-0.441645	1.35657695562087e-05
Slc16a11	1.96785	1.35657695562087e-05
Polq	-0.433772	1.36318287180952e-05
Phlda3	0.40657	1.37206653967547e-05
Col24a1	0.470496	1.39011804009859e-05
Palmd	0.741407	1.3928449839888e-05
Prkar2b	-0.354165	1.39338868701504e-05
Miat	0.62951	1.40695257512517e-05
Ptgis	0.500719	1.41020213723618e-05
Ppp3cc	0.407478	1.4229371684967e-05
Prok2	1.00015	1.42310841410519e-05
Rnf122	-0.397405	1.42310841410519e-05
Arsi	0.93935	1.42480669572837e-05
Mcm5	-0.420822	1.45378352583867e-05
4930557F10Rik	1.20377	1.45659957395781e-05
Klf7	-0.32477	1.45828089996357e-05
Ptpn20	1.89787	1.45828089996357e-05
Sparc	0.298792	1.46008387095899e-05
Ndufa4l2	1.09804	1.46598212073266e-05
Hsph1	0.370387	1.49194446389976e-05
Mapk4	0.547607	1.49625842339032e-05
Meioc	0.966398	1.51805358772457e-05
1500015L24Rik	0.724033	1.51975515521627e-05
Plppr3	-0.423823	1.53295134496399e-05
Epha6	-0.603637	1.5360905312567e-05
Cga	-2.32066	1.54334831789196e-05
Plekho1	-0.387793	1.55601206447849e-05
Fcgrt	0.397088	1.55620918890252e-05
Brd3	-0.325484	1.55765708725566e-05
Ltbp3	0.448666	1.59009614467884e-05
Sema3c	0.468559	1.59525917785435e-05
Sema3a	-0.389466	1.61050575427082e-05
Ptpro	0.52378	1.61575801406403e-05
Rbfox1	0.518694	1.62246297405168e-05
Qprt	1.2183	1.62637027797467e-05
5330434G04Rik	-0.888528	1.62760510877998e-05
Hnrnpd	-0.328539	1.63736220098116e-05
Tshz1	0.331493	1.68309327653625e-05
Gjc1	-0.326335	1.68474151184857e-05
Mphosph10	-0.377854	1.70047923893153e-05
Stac	0.662888	1.71515434412096e-05
Cbx2	-0.561324	1.7270296714837e-05
Cenpp	-0.323927	1.73234305500588e-05
Sorbs2	-0.430877	1.73349975537935e-05
Hspa1a	0.544841	1.73567970018264e-05
Dclk1	0.291012	1.74018188873154e-05
Aff2	0.35735	1.74231389069908e-05
Dock3	0.575268	1.76544309747033e-05
Ska2	-0.382834	1.7874667426876e-05
Ryr3	-0.450901	1.79905185034433e-05
Bcl7a	-0.429686	1.80054302985005e-05
Ccnj	-0.576652	1.81074853813406e-05
Mtus2	0.439543	1.82636384203016e-05
Jam2	0.478367	1.86954488997598e-05
B130024G19Rik	-0.560778	1.88369277384284e-05
Castor1	0.941347	1.89217929449718e-05
E2f3	-0.344583	1.89677896575355e-05
Cxcl9	2.10481	1.91289394088066e-05
Creb3l1	0.438631	1.9350331752107e-05
Ocln	1.19921	1.94171645898236e-05
Myo7a	-1.53649	1.95652105367163e-05
Clspn	-0.420494	1.97703678879428e-05
Haus7	-0.438575	2.01121918778916e-05
Epcam	0.658234	2.01971545339197e-05
Itpr2	0.521885	2.02138920891352e-05
Gprc5a	0.973577	2.02772212560715e-05
Col1a1	0.386243	2.07878877675357e-05
Pld2	0.758509	2.12917217832172e-05
Rmdn2	0.434177	2.1575289423914e-05
Irs4	1.42407	2.17936184698666e-05
Mapk13	0.758624	2.19660233802615e-05
Gm20756	1.05239	2.22414108960912e-05
Mex3c	-0.349561	2.22568612457366e-05
Cxcl15	2.8243	2.2269311994158e-05
Ccdc85a	-0.518897	2.25260289954683e-05
Armh4	0.446631	2.26600307830587e-05
Prph	1.21752	2.31739595870995e-05
Ankrd6	0.416854	2.33535123264247e-05
Mpnd	-0.360908	2.37728208993468e-05
Gm36388	1.17031	2.38681104046894e-05
Pantr1	-0.631723	2.3904596262796e-05
Clstn2	-0.342359	2.3904596262796e-05
Nid2	0.379413	2.39812150131085e-05
Arsj	0.498084	2.40847692902147e-05
Prkg2	-0.469794	2.47265197419149e-05
5730522E02Rik	-0.36347	2.47339614692689e-05
Il33	0.86424	2.55991032095426e-05
B3galnt1	0.424102	2.58317115889817e-05
Wfikkn2	0.800246	2.58836840854622e-05
Sgpp2	-0.657326	2.606327383759e-05
Cxcl14	0.407399	2.6071943207984e-05
5330417C22Rik	1.01416	2.60971633385851e-05
Ccdc68	0.963581	2.61675949690564e-05
Siah3	0.970441	2.67260977598637e-05
Gm14091	1.47885	2.68453987269142e-05
Gm30177	2.79239	2.70298224967757e-05
Ctsf	0.494834	2.7198607278746e-05
Gm47644	0.617604	2.72501907212272e-05
Lrig3	-0.407809	2.72501907212272e-05
Plppr4	0.785755	2.77013485731777e-05
Gpr4	1.09769	2.78414226444862e-05
Asph	-0.318112	2.7907272375487e-05
Papss2	0.441355	2.85709721676741e-05
Zic5	0.625999	2.86218080917162e-05
Cldn34c1	-0.408808	2.87116571873436e-05
Calb1	0.776208	2.8712568544571e-05
Tnfrsf23	0.656012	2.89165998442965e-05
Gm26676	1.27737	2.90232922840355e-05
Dek	-0.326341	2.90870213065153e-05
2700081O15Rik	-0.357178	2.91047059194891e-05
Cavin1	0.459953	2.91047059194891e-05
Tek	0.633978	2.92530983009049e-05
Gm48155	-1.53484	2.94723661178327e-05
Gm34342	1.64981	2.95564007001018e-05
Pkp2	1.25003	3.05480072240216e-05
Heg1	0.392163	3.08771976966111e-05
Gm17501	-0.406872	3.09828581670487e-05
Ltbr	0.589879	3.11056424881107e-05
Grin2a	0.49416	3.13560426777527e-05
Sh3kbp1	0.389968	3.17009297931497e-05
Myh9	-0.421522	3.17912181900233e-05
Srrm4	0.852225	3.19111774605218e-05
Zmat4	-0.555706	3.24929358904994e-05
BC035947	0.842289	3.40521590422081e-05
Hopx	0.909153	3.40889284440802e-05
Slc9a7	0.608884	3.4132360318449e-05
Fbln5	0.355124	3.46640103907991e-05
6330411D24Rik	0.591372	3.47560613320321e-05
Adamts12	0.450139	3.53790507765632e-05
Arhgap9	1.42804	3.56134885673675e-05
Il15ra	1.04923	3.61631457106079e-05
Rprml	2.07993	3.66838295867282e-05
Paip1	-0.291038	3.69873349518393e-05
Elf1	-0.301332	3.71536623778107e-05
2410018L13Rik	-0.377473	3.75250034921188e-05
Dhcr24	-0.421807	3.8307580628958e-05
Tmem45a	0.504383	3.83117928851841e-05
Nhsl2	0.311372	3.85702249705331e-05
Sema6a	-0.307552	3.88583109536039e-05
Irx3	-0.40041	3.92596377318904e-05
Smarca4	-0.322759	3.93632492852199e-05
Mki67	-0.371084	3.93632492852199e-05
Crip1	0.545937	3.94005131839871e-05
Olfm1	0.359166	4.01330568361355e-05
Zfp668	-0.508031	4.0280108066247e-05
Igfbpl1	0.803107	4.04962562059952e-05
Hoxb4	3.13425	4.10066609000551e-05
Dock11	0.39469	4.10066609000551e-05
Camk2d	0.305873	4.13230985720793e-05
Adgrd1	0.976956	4.48358600407181e-05
Mastl	-0.395733	4.48571791389173e-05
Thsd4	0.389998	4.49832202585774e-05
Kntc1	-0.403681	4.61719324537489e-05
Rxrg	0.805019	4.6448949274987e-05
Agmo	0.916108	4.70531997999852e-05
Trhr	1.3533	4.79779426998251e-05
Clec1a	1.56029	4.83398415207225e-05
Zfp644	-0.311595	4.89648518979905e-05
Gm11944	-0.41271	4.92398900693168e-05
P4ha3	0.358423	5.02034317719088e-05
Naaa	0.577448	5.03005903536092e-05
Spint2	0.605582	5.08180385557709e-05
Crem	0.368488	5.11251587545953e-05
4930473A02Rik	0.425409	5.12698132735454e-05
Tmem108	0.470894	5.1472319173338e-05
Gm45441	1.3835	5.1472319173338e-05
Flrt2	-0.306011	5.1472319173338e-05
Srrm3	0.551907	5.16623072017175e-05
Rnf208	0.95944	5.19074935888643e-05
Pabpn1	-0.32539	5.21906970558913e-05
Lrp12	-0.356214	5.27543734560866e-05
Hsd17b11	0.374829	5.31434510946677e-05
Spen	-0.404865	5.33744535151297e-05
Il27ra	1.21789	5.36065751559083e-05
Ednrb	-0.663811	5.38554502065462e-05
Plekha2	0.624419	5.38554502065462e-05
Enpp5	0.53652	5.45645195130743e-05
Rian	0.366899	5.47912084766242e-05
Mis12	-0.430343	5.51207382048244e-05
Tspan17	0.982731	5.51391485023851e-05
B4galt4	0.475883	5.51391485023851e-05
Nnat	-0.480053	5.54260689818506e-05
Il17rc	0.995086	5.54260689818506e-05
Gria2	0.413104	5.61682086448271e-05
H2-DMb1	1.01013	5.75781646364745e-05
Lin9	-0.329309	5.78352919541628e-05
Rhoc	0.314358	5.85214624325111e-05
Fzd8	0.419501	5.89662396179767e-05
AW551984	0.314824	5.89662396179767e-05
Ets2	0.355361	5.91738233219735e-05
Gm5441	1.14288	5.93643207684746e-05
Pmf1	-0.371034	5.93643207684746e-05
Tril	0.454393	5.93643207684746e-05
Rtl1	0.376059	5.93643207684746e-05
Map1a	0.549748	5.96508689473592e-05
Mamdc2	0.703079	6.01312307844214e-05
Cd47	0.330367	6.06874401143765e-05
Gm15581	0.960114	6.16318031313694e-05
Crym	-0.576988	6.19207449546253e-05
Car11	0.578345	6.19207449546253e-05
Gm44593	-0.589727	6.23943529332373e-05
Lin28b	0.650621	6.23943529332373e-05
Top1mt	0.565888	6.24837197504309e-05
Hmga2	-0.492287	6.26270169571386e-05
Adgrl2	-0.304018	6.26903006850388e-05
Tppp3	0.608295	6.30528418806457e-05
Ly86	0.886187	6.3507860020774e-05
Aim2	-0.795907	6.43774667525772e-05
Hhipl1	1.18338	6.44842073017511e-05
Zfp612	0.599277	6.47945720669967e-05
Gm28756	0.807748	6.47945720669967e-05
Hs6st2	0.339235	6.48197823264593e-05
Zeb2	-0.394651	6.49115443131588e-05
Ctxn1	-0.38374	6.49115443131588e-05
Kcnb1	0.516725	6.58903697458601e-05
Dlgap3	0.853481	6.6763872599208e-05
Wnt5a	-0.452242	6.6803236333376e-05
Foxp1	0.261313	6.68556937038936e-05
Dhfr	-0.349492	6.68556937038936e-05
Otud1	0.638448	6.68944168180536e-05
Arhgap10	0.301441	6.70972152613616e-05
Ezh2	-0.305918	6.84678928583679e-05
Ier3	0.461073	6.85827552904294e-05
Pik3r3	-0.313124	6.95244599616422e-05
Pold3	-0.357309	6.95778389277624e-05
Slc35f1	0.453266	6.97568066677075e-05
Adh1	1.29106	7.00139629830815e-05
Nsd2	-0.292491	7.16187390935062e-05
Stac2	0.744538	7.22083283405492e-05
Cpz	0.700566	7.24380298792714e-05
Cyp46a1	1.12803	7.24769410500772e-05
L3mbtl4	1.1118	7.25078165371494e-05
Man1c1	0.442254	7.26083970939096e-05
Lig1	-0.363546	7.27238410985468e-05
Nox4	-0.384582	7.27275526797306e-05
Gucy1a2	-0.376593	7.27288099396204e-05
Rbmx	-0.358701	7.32810946111632e-05
Uhrf1	-0.387233	7.33801584290027e-05
9030624G23Rik	-0.5087	7.36219689636222e-05
Dhx9	-0.295221	7.37455887679998e-05
Slc1a1	0.727395	7.39941571985258e-05
Catsperg1	0.891782	7.4114811078944e-05
4833439L19Rik	-0.360032	7.47556594289169e-05
Gm26812	1.07536	7.53227012351624e-05
Gm45669	-0.461906	7.5838396840816e-05
Dnajb9	0.39175	7.65200871696469e-05
Cltb	0.36335	7.71866194638771e-05
Gm12296	0.978394	7.74846811471136e-05
Plekhg2	-0.365852	7.75342526179783e-05
Dab1	0.298525	7.75342526179783e-05
Rgs20	0.505726	7.78784712604195e-05
Steap3	0.725119	7.80631246058841e-05
Nfix	0.358556	7.98420904324563e-05
Efcab11	-0.365851	7.98572300949266e-05
Decr1	0.414775	7.98572300949266e-05
Cdkn1a	0.597096	8.06335417473934e-05
Fras1	-0.309396	8.09117246208874e-05
4930533K18Rik	0.469261	8.09117246208874e-05
Bahd1	0.651581	8.14839780685118e-05
Gm30835	0.987177	8.16349969884495e-05
Areg	1.80873	8.16717465357933e-05
Gm19744	0.539281	8.20393962337211e-05
A230056P14Rik	-0.630282	8.26597834090945e-05
Irgm1	1.11101	8.29867126429082e-05
Wdr17	-0.889007	8.31252365385178e-05
Pde7a	-0.344097	8.31252365385178e-05
Dst	0.30892	8.31252365385178e-05
Foxd3	4.10631	8.31252365385178e-05
Fam114a1	0.344944	8.43618904668115e-05
Nrxn1	0.378397	8.48856581413239e-05
S100a11	0.441754	8.48856581413239e-05
Pcdh18	-0.326728	8.52247522562029e-05
Bcl2l12	-0.494193	8.52247522562029e-05
Camk2n1	0.397043	8.61452195684963e-05
Kif15	-0.373236	8.62722323887204e-05
Ryr2	0.361876	8.63010776059909e-05
Sun2	-0.437316	8.63010776059909e-05
Dbx2	1.49729	8.63010776059909e-05
Slc30a4	0.43404	8.6390696900517e-05
Mt1	1.78201	8.66020851834601e-05
Ro60	-0.311378	8.67494491949641e-05
Lin7a	-0.386811	8.75638574576799e-05
Scara3	0.432527	8.80843272503699e-05
Rtl3	0.39077	8.81863640983092e-05
Pla2g4c	-0.752746	8.81903174521031e-05
Igf2bp1	-0.361659	8.98223293852425e-05
Patj	0.319038	9.09963077805148e-05
Necab1	0.435658	9.35940762116531e-05
Esr2	0.562507	9.36912713724428e-05
BC107364	2.08928	9.36912713724428e-05
Tmco4	0.514776	9.3805723757651e-05
Gsap	0.689304	9.40119564016767e-05
Khdrbs1	-0.274902	9.49276473783474e-05
Casp4	1.84489	9.5463813855039e-05
Fos	0.517351	9.66684364191982e-05
Plekhg6	0.876293	9.75062564009874e-05
Commd3	0.403886	9.75893886097816e-05
Lhpp	0.494927	9.7660128487836e-05
Rbm47	0.419993	9.91639153998671e-05
Nup62cl	1.00647	0.000100007
Chn1	-0.314141	0.000100118
Ifi27l2a	1.06191	0.00010057
Stc1	0.487149	0.000100935
Gad2	0.830505	0.000101172
Isl2	1.30054	0.000101646
Arhgap20os	0.797378	0.000102359
Ckap5	-0.27644	0.000103625
Trim12c	0.511209	0.000104212
Dlgap5	-0.393369	0.000104497
Plaur	0.882189	0.000104629
Fermt2	-0.285382	0.000105284
Ncapd2	-0.405236	0.000106863
Gm7694	0.992435	0.000108331
Dpyd	-0.288526	0.000108364
4930503L19Rik	-0.403299	0.000109393
Emb	0.463532	0.000110325
Cenps	-0.516488	0.00011229
Fhod3	-0.335161	0.000112839
Stambpl1	0.336389	0.000112864
Maff	0.527655	0.000112988
Rpgr	-0.317875	0.000112988
Spc24	-0.38616	0.000113501
Epb41l4a	0.353092	0.000115222
B830012L14Rik	0.392937	0.000116606
Plekhh3	0.590315	0.000116999
Eed	-0.351308	0.000117648
Nkx2-4	2.05432	0.000117676
Pdgfra	-0.299457	0.000117996
Diaph3	-0.271255	0.000118072
Apoe	0.471176	0.000120616
Gm8251	-0.486333	0.000124338
Iqsec2	0.384616	0.000124706
Kcnq2	1.07987	0.000126324
Brwd3	-0.354466	0.000126324
Slc22a2	0.818601	0.000126899
Myt1l	0.835459	0.000127069
Gria4	-0.325682	0.000127141
Hs3st5	-0.407109	0.00012894
Bmerb1	-0.487241	0.000129863
Skp2	-0.359848	0.000130595
Ramp1	-0.827648	0.000130595
Pola1	-0.283362	0.000132855
A730049H05Rik	0.624505	0.000133083
Hdgf	-0.313048	0.000134297
Incenp	-0.369694	0.00013462
4930517O19Rik	-0.37422	0.000134637
Cep170	-0.306417	0.000136416
Osr1	-0.382636	0.000136516
Grina	0.416536	0.000137752
Gm29157	1.94946	0.000139048
Dgkb	0.534377	0.00014091
Chrna4	0.929392	0.000141742
Prokr2	0.730851	0.000142919
4930473D10Rik	1.03684	0.00014393
Lef1	-0.397256	0.000144094
Dusp3	0.407618	0.000144252
Snap91	0.428352	0.000144582
Lyar	-0.303801	0.000146765
Arap1	0.526598	0.000147247
Arhgap27os2	1.19653	0.000147423
Kif4	-0.381585	0.000147423
Fnip1	0.371274	0.000147423
Sim2	0.456895	0.000147423
Prokr1	0.728421	0.000150212
Adamts18	-0.682504	0.000150785
Efcab6	1.31408	0.000151193
Ell2	0.393098	0.000153385
Tenm1	0.363368	0.000153654
Gabra2	0.412397	0.000155223
Spdl1	-0.447528	0.000156131
Phf19	0.889939	0.000156334
Abca3	0.489574	0.000157299
Pycr1	0.45997	0.000158206
Slf1	-0.289063	0.000158388
Disc1	0.419251	0.000158548
Magi1	0.294636	0.000158818
Sema5b	0.330962	0.000159361
Ano4	0.5141	0.000160071
Zfr2	0.404961	0.000161816
Casp12	0.989853	0.000164077
Dbn1	-0.300942	0.000164094
Bmp4	0.35405	0.000164219
Aspm	-0.343732	0.000164383
Fzd6	0.50963	0.000164694
C1ql1	0.692316	0.000164938
Blvrb	0.332932	0.000165924
Klf8	-0.407305	0.000166459
Galnt3	0.734948	0.000166531
Sltm	-0.306373	0.000166623
Mmd	-0.33783	0.00017778
Col11a2	0.529856	0.000179367
Tafa2	-0.317512	0.000181161
Lbx2	2.50612	0.00018241
Mis18bp1	-0.391695	0.00018257
Tcf7l1	-0.280509	0.000183673
Gch1	0.680331	0.000184524
Dnmbp	0.370549	0.000185337
Adamtsl5	0.87231	0.000185337
Mcu	0.289278	0.000187608
Ptprz1	-0.347716	0.000187966
Fancm	-0.317739	0.000189341
Cbx1	-0.293733	0.000189343
Pvt1	0.316546	0.000189353
Pdk1	0.41509	0.000190551
Cpeb3	0.354201	0.0001907
Gm8113	-1.1739	0.000190732
Tdg	-0.299631	0.000192099
Crh	-1.23062	0.000192819
G3bp2	-0.276491	0.000196058
Syt1	-0.373875	0.000196058
Anp32a	-0.282851	0.000196698
Ptch1	-0.331892	0.00019798
Gm12064	-0.617665	0.000202018
Sypl2	1.30201	0.000202277
Esm1	1.48888	0.000202277
Arfgap1	0.299765	0.000202277
Efna5	-0.262534	0.000202613
Slc40a1	0.475282	0.000203047
Pold4	0.463139	0.000203356
Spry1	0.352366	0.000205551
Gulp1	0.322056	0.000206274
Gm47405	1.20023	0.000206561
Cavin3	0.341315	0.000207084
Hist1h2bm	-0.803448	0.000207459
Chaf1b	-0.406768	0.000207699
Acer2	0.56247	0.00020875
Palm	-0.350481	0.000208775
Svip	0.718156	0.000208935
Elovl6	-0.322395	0.000208941
Tmem132a	-0.398585	0.00020904
Rttn	-0.335368	0.000211886
Gm15336	0.763779	0.000211886
Rtn4r	0.637434	0.000214062
Gm38505	1.11779	0.00021532
Ppara	0.763938	0.000217132
Sv2c	1.02536	0.000218068
Tmem56	0.638225	0.000219022
Hmgcr	-0.324898	0.000219105
Ier5l	-0.467699	0.000224212
Kcnk10	0.855907	0.000224847
Garem1	0.330797	0.000225991
Gm45716	-0.525107	0.00022624
Rpl9-ps6	0.553715	0.00022624
Arid3a	-0.568285	0.000229239
Stat3	0.301838	0.000229502
Gpr149	1.22738	0.000229659
Ndst3	-0.390577	0.000229791
Cpt1a	0.502792	0.000229851
Cftr	0.642771	0.000229851
Gm20005	1.17013	0.000230554
Vcan	-0.261147	0.000241197
Kansl2	-0.286245	0.000249813
Wdfy3	-0.261798	0.000250612
Cntn6	-1.25103	0.000251926
Il13ra1	0.432913	0.000253354
B230354K17Rik	-0.369972	0.000253355
Sptbn4	0.66873	0.000254835
Flnb	0.31226	0.000257333
Chd4	-0.3421	0.000257478
Il16	0.532416	0.000258415
Nfatc1	0.335518	0.000260809
Tunar	1.0134	0.000261564
Acta1	1.50784	0.0002627
Pdlim1	0.410144	0.0002627
Ncapd3	-0.326647	0.000265247
Cacna2d3	0.328243	0.000267614
Stc2	1.25859	0.00026792
Cebpa	0.561805	0.000270808
Moxd1	0.529618	0.000278255
Sall3	0.988311	0.000280162
Dsc3	0.855263	0.000280184
Kank2	-0.320518	0.000280225
Igf2bp3	-0.287934	0.000281211
Shisa6	0.706664	0.000281555
Zfp90	-0.358033	0.000281587
Stk35	-0.416344	0.000281682
Mn1	-0.386548	0.000282739
Nr4a1	0.416609	0.000283997
Nrk	0.312539	0.00028536
Rasgrp2	-0.471868	0.00028536
Nrp1	0.360596	0.000288994
Gm26648	-0.732833	0.000289958
Lipa	0.324924	0.000290243
Adam12	0.440822	0.000290965
Mtus1	0.522293	0.000296454
Shisa7	1.26298	0.000296454
Frat1	0.720049	0.000297379
C530008M17Rik	-0.348606	0.00029982
Ldlr	-0.36767	0.000301799
Sdk1	0.268633	0.000302174
Plk1	-0.432859	0.000303177
Thsd1	0.516568	0.000303381
Ncl	-0.26588	0.000304536
Ptger3	0.51187	0.000305847
Eif3j1	-0.460645	0.000306463
Slc16a6	0.543888	0.000306943
Phip	-0.255303	0.000306991
Fam241a	0.501971	0.000308923
Zbtb12	-0.345166	0.000310114
Cnnm1	-0.465986	0.000317003
Arnt2	-0.321825	0.0003185
BC028528	0.479952	0.00031948
Actc1	1.22001	0.00031948
Abca8a	0.582036	0.000320647
Pard6g	-0.36334	0.000324996
Ehmt1	-0.257834	0.000325628
Rad51	-0.428925	0.000326632
Cys1	0.435683	0.000331637
Dcbld1	-0.342434	0.000332515
Exo1	-0.387859	0.000334918
Pik3r5	0.732773	0.000335424
Cep78	-0.366909	0.000336603
Shc2	-0.481374	0.000337587
Cenpj	-0.42774	0.000337587
Fkbp10	0.320469	0.000338719
Cdh22	0.831862	0.000338831
Rem1	0.998323	0.000339543
Srpk1	-0.305336	0.000340192
Kif11	-0.342223	0.000340328
Nfia	0.269896	0.000344427
Six3os1	0.983796	0.000344427
Cfap74	0.51244	0.000344427
Zfp553	-0.395792	0.000348203
Hnrnpr	-0.263422	0.000348203
Spaca1	0.682402	0.000348323
Ccdc6	0.327003	0.000348323
Gm5577	-0.432774	0.000349063
D030025E07Rik	-3.69533	0.000349063
Gfod1	0.404864	0.000349345
Lrrc36	0.806909	0.000351123
B2m	0.39374	0.000351123
Spry4	0.518114	0.000351796
Ypel1	-0.30937	0.000352186
Mylpf	0.980573	0.000357518
Sms	-0.433777	0.000357686
Ly6k	2.47533	0.000357805
Smad6	-0.441759	0.000358419
Kcna4	0.825253	0.00035852
Tmem30b	0.710725	0.000361138
Gramd1b	-0.461223	0.000361614
Trim5	-3.44512	0.000361906
Tmpo	-0.301306	0.000362281
Trip13	-0.400796	0.000363538
Olfml2b	0.478075	0.000363762
H2-T22	0.701338	0.000367527
Gm26632	0.43722	0.000368353
Gm29328	-1.88144	0.000368945
Angptl2	0.348206	0.00037188
Stk33	0.558427	0.000373042
Srsf10	-0.265772	0.000376515
Ank3	0.310016	0.000376515
Lamc2	0.545512	0.000377346
Syt11	-0.364452	0.000387011
Cyp51	-0.297713	0.000397138
Syngr1	0.982419	0.000398547
Nasp	-0.308691	0.000401619
Fam174b	-0.437902	0.000403982
Tmed3	0.365216	0.000403982
Efna4	-0.348225	0.000404703
Cadps	0.435308	0.000407078
Gcnt2	0.395495	0.000412236
Fzd4	0.422577	0.000419188
Thrb	0.497974	0.000419668
Rspo1	-0.413111	0.00041979
Slc22a1	0.57463	0.00041979
Trak1	0.383879	0.000420174
Hcrtr2	-0.785617	0.000420174
Cry2	0.424247	0.000422112
Olfr920	0.782055	0.000424101
Gpc2	-0.380373	0.000433125
Rif1	-0.303911	0.000433783
Zfp810	-0.351024	0.000437462
2610316D01Rik	-0.335457	0.000437567
Jakmip1	1.84049	0.00044296
Arid4b	-0.253488	0.000443539
Acan	0.475481	0.000443539
Cldn1	0.648222	0.000443539
Sqle	-0.364155	0.000443919
Tbx3os1	0.363587	0.000445866
Xkr4	0.341315	0.000446275
Ntn4	0.389149	0.00044675
C2cd4b	1.44762	0.000447275
Txnrd3	-0.4625	0.000452456
Mvb12b	-0.288489	0.000452901
Pde4d	0.254901	0.000453581
Prrg4	0.694932	0.000466108
Lynx1	1.10424	0.000466108
Fam117b	-0.263933	0.000467169
Pantr2	-0.597903	0.000467517
Rufy3	-0.290881	0.000476851
Ttk	-0.399129	0.00047858
Arid2	-0.253383	0.000479106
Gria3	0.287909	0.000480859
Lrriq1	-1.04073	0.00048169
Slc44a5	-0.383328	0.000482777
Mir9-3hg	0.915122	0.000483061
Syt7	0.560073	0.000483431
Ppp1r13b	0.313784	0.000485325
Arhgdib	0.381448	0.000488286
Bves	0.475198	0.000493171
Ss18l1	-0.476768	0.000494916
Pcdh17	-0.317887	0.000497354
Midn	-0.289983	0.000498033
Nrbp2	0.546563	0.000506174
Col26a1	-0.294422	0.000507885
Ptpre	-0.380742	0.000508252
Nup50	-0.310915	0.000513124
Cthrc1	0.38955	0.000521765
Tmem39b	-0.37704	0.000521765
Efnb2	-0.287577	0.000528621
Ptgfr	-0.619182	0.000530561
Srf	-0.409669	0.000531421
Kif22	-0.374519	0.000531421
Mfap3l	0.639277	0.000535238
E2f7	-0.405952	0.000536772
Vldlr	0.380525	0.000536772
Inava	-0.509501	0.00053718
Ncam2	-0.282726	0.000537389
Prkar1b	0.38218	0.000538976
Stmn1	-0.42083	0.000546123
Pag1	0.369999	0.000551872
2810433D01Rik	1.02652	0.000555218
Ankrd44	-0.294845	0.00055863
Sox2ot	0.477926	0.00055863
B3glct	-0.351697	0.000561003
Hells	-0.360457	0.000561003
Lama1	-0.375719	0.000565941
Palld	-0.246091	0.000566327
Prr11	-0.357082	0.000567151
Fgf18	0.375373	0.000572596
4930474M22Rik	-0.734138	0.000574274
Nsl1	-0.511129	0.000575614
Igf1r	-0.244002	0.000575746
Depdc1b	-0.526096	0.000576517
Reep1	0.360282	0.000577552
Ndc1	-0.349663	0.000583881
Akap12	0.360979	0.00058443
Myocd	0.729733	0.000587722
Mex3d	-0.374888	0.000593213
Comp	0.869257	0.000594248
Ppp1r3b	-0.550617	0.000595802
Sat1	0.390017	0.000602762
Nfatc2	0.420194	0.000603584
Unc93b1	0.546518	0.000604331
Dbf4	-0.341578	0.000604463
Fdps	-0.388167	0.00060474
Ehd4	0.421973	0.000605936
2010300C02Rik	0.577904	0.000608478
Spats2l	0.296736	0.000614074
Tmem91	0.788013	0.000614074
Farp1	-0.250655	0.000620824
Irf8	0.899881	0.000621797
Abtb2	0.321544	0.000623605
Cercam	0.431198	0.00062438
Gm16201	0.461584	0.000627182
Gpsm2	0.303896	0.000638568
Tmem132e	0.88603	0.000639765
Mad2l1	-0.350821	0.000646519
Emp1	0.421541	0.000650704
Bnip3	0.407152	0.000651129
Sh3yl1	-0.415002	0.000660245
Nop56	-0.283653	0.000661187
Tmem120b	0.38709	0.000663086
Stat5b	0.306046	0.000664049
Anapc15	-0.376552	0.000664049
Kcnc3	0.716794	0.000666886
Hdgfl3	-0.243142	0.000669027
Spag6l	1.15038	0.000674164
Inip	-0.425861	0.000674787
Cep97	-0.336369	0.000675387
Rnf219	-0.318796	0.000679032
Glrb	0.462233	0.000679111
Myo1b	-0.254483	0.000680101
Zfyve28	0.859086	0.000681469
Gm13166	1.6294	0.000687984
Sfrp5	1.18861	0.000688219
Epop	0.505744	0.000689233
Ttc21a	0.468398	0.00069148
Slit2	-0.232308	0.000694168
Usp54	-0.303234	0.000694168
Lgals3bp	1.08642	0.000695857
Exoc4	0.271937	0.000698848
Ppip5k2	-0.297694	0.000707163
Asic1	0.820691	0.000709299
Kmt2e	-0.266133	0.000712972
Gm35040	1.36196	0.000713826
Ahrr	0.517211	0.000715655
Lcorl	-0.311969	0.000716703
2600014E21Rik	-0.635817	0.000719991
Ahr	0.521971	0.000725877
Snai1	-0.485452	0.000732184
Naa35	-0.256972	0.000739918
Plekha4	0.619149	0.000740742
Abhd3	0.608916	0.000745465
Lekr1	0.322863	0.000752589
Zbtb2	-0.368244	0.000753217
8030451A03Rik	0.422235	0.000756451
Fam20c	0.613309	0.000758516
Trim33	-0.251219	0.000758795
S100a2	1.80565	0.000762732
Gm48024	0.876198	0.000762732
Gm29502	1.58122	0.000762732
Ctdspl2	-0.248793	0.000770728
Cdc45	-0.393451	0.000770728
Grem2	0.398939	0.000774525
Gbp6	1.11155	0.000776502
Ptprm	0.284205	0.000781259
0610005C13Rik	1.03513	0.00078549
Fmo2	1.38465	0.000790236
Orai3	0.436684	0.000794204
Dzip1l	-0.34842	0.000794204
Slc38a9	0.314942	0.00080397
Rarres1	0.723419	0.000816393
Sox3	1.1143	0.000828212
Psd	0.508119	0.000833339
Ect2	-0.360515	0.000833339
Sgo2a	-0.343387	0.000833863
Prdx5	0.279013	0.000834181
Rapgef5	0.333582	0.000836333
Zfp131	-0.282872	0.000836761
Hoxd8	0.583155	0.000838715
Crispld2	-0.384415	0.000842195
Slc47a2	1.84797	0.000842718
Lmo1	0.561849	0.000842922
Znrf1	-0.242876	0.000843091
Nipal1	0.996844	0.000846721
Alpk1	0.333686	0.000850974
Fam126a	-0.317747	0.000852248
Kcng3	0.954558	0.000857176
Il1rap	0.308719	0.000857864
Gm37245	0.968762	0.000867148
Cd83	0.713251	0.000872429
Zfp821	-0.283375	0.000882267
Gm49477	2.38516	0.00089126
Gm20631	-0.311952	0.000898562
Chst13	-1.98363	0.000907363
Dlx6os1	-0.425588	0.000909259
Etaa1	-0.333168	0.000916296
Tcf7l2	-0.27212	0.000917484
Gm30489	2.35614	0.000919361
Cst6	1.47172	0.00091982
Fgf8	0.976877	0.000923072
Ap1s2	0.320749	0.000923072
Gm5095	1.28824	0.000926317
1600002D24Rik	-0.714511	0.000926317
Prpf40a	-0.231559	0.000927549
Ube2g1	-0.26418	0.00092827
Gnas	0.236362	0.000932186
Rapgef3	0.592887	0.000933476
Lrrc8d	-0.316787	0.000940278
Pnn	-0.253661	0.000946443
Il17rd	-0.29801	0.000946783
Ctbp2	-0.320129	0.000950786
4930523C07Rik	0.466272	0.000951235
Chn2	0.322644	0.000952348
Stard13	0.387606	0.000952513
Zfp24	-0.292722	0.000953205
Diras2	0.750178	0.000953205
Chodl	0.384109	0.000963269
Zswim5	0.469548	0.00097153
Myd88	0.563451	0.00097153
Zfp60	-0.341731	0.000971999
Cdh10	-0.329981	0.000973898
Tmem132b	0.458873	0.000973898
Ssbp3	-0.293699	0.000983635
Tcim	0.446364	0.00101003
Trappc6a	0.327312	0.00101448
Slc10a6	1.0694	0.00101539
Mex3b	-0.306295	0.00102434
Prnp	0.273573	0.00103883
2500004C02Rik	-0.472504	0.00104384
Phldb3	1.06411	0.00104491
Cd38	0.726273	0.00104718
Kcnrg	0.463239	0.00104718
Cdc14a	-0.333782	0.0010552
Apbb2	-0.238941	0.00105576
Irf3	-0.366493	0.00105814
Stmn3	0.703276	0.00106095
Eya2	-0.294972	0.00106095
Dpp4	0.624586	0.00106155
Chd7	-0.294438	0.00106155
Syncrip	-0.237826	0.00106587
Notum	0.701254	0.00106913
Ncs1	-0.341467	0.00106995
Mybl2	-0.426505	0.00107223
Ap3b2	1.12434	0.00107641
Cdo1	0.308307	0.00108642
4930478K11Rik	2.08086	0.00109585
Rgs16	0.593615	0.00109702
Sytl2	0.487888	0.0010982
Sept3	-0.352311	0.0010994
Dlg3	-0.334839	0.00110481
Smim3	0.372383	0.00111079
Fads2	-0.363471	0.00111174
9530077C05Rik	0.562114	0.00111419
Lims1	-0.263558	0.00111867
Anxa3	0.338014	0.00111976
Il6ra	0.602087	0.0011204
Mageb18	0.799575	0.00112147
Tbx15	0.287893	0.00113097
Tpx2	-0.357463	0.00113732
Eps8	0.259776	0.00113733
Bdkrb2	0.482379	0.00114173
Lgals9	0.452034	0.00114334
Clstn3	0.410864	0.00114595
Dnase2a	0.405881	0.00114647
Gnal	0.387068	0.00114647
Ibsp	-2.52371	0.00114665
Plxnb1	-0.670585	0.00114832
Cdh7	-0.7238	0.00115302
Ncapg	-0.322696	0.00115496
Sugct	0.37598	0.00115662
Gask1b	0.4995	0.00115662
Slc5a12	2.7796	0.0011573
Nectin3	-0.269626	0.0011573
Tnxb	0.860621	0.00116082
A930004D18Rik	0.44844	0.00117071
Pogk	-0.320777	0.00117268
Zfp281	-0.360333	0.0011729
Prcp	-0.308081	0.00117322
Rec8	0.859965	0.0011801
Gpx3	0.478587	0.00118753
Rmi2	-0.339211	0.0011936
Gdf10	0.387334	0.00119367
Gm11973	0.554693	0.00120421
Prdm16	-0.329633	0.00120497
Adgrf5	0.949989	0.0012107
Nid1	0.297199	0.00121633
Kif2a	-0.24427	0.00121767
Ston2	0.375777	0.00121945
Gpr153	0.358961	0.00122556
Vav3	0.265825	0.00122645
Arl4a	0.266413	0.00123482
1110018N20Rik	1.02276	0.00123482
Sorbs3	0.402996	0.00123577
Kpna4	-0.263223	0.00124076
Pcdh8	0.629077	0.00126271
Tlr5	0.952748	0.00126323
Hirip3	-0.353236	0.00126323
Atat1	-0.294289	0.00126323
Unc13b	0.308656	0.00127465
Gm43305	0.890809	0.00127465
Mlkl	1.74879	0.00127772
Flnc	0.36387	0.00128986
Hhex	0.994742	0.00128986
Cntn3	0.326262	0.00129149
Dop1a	0.269071	0.00129331
Helz2	0.701898	0.00130339
Dnph1	-0.434117	0.00131243
Ddx46	-0.236387	0.00132193
Sdcbp	0.266898	0.00132474
Rangap1	-0.296763	0.00134238
Per2	0.394568	0.00135061
Rassf5	0.53473	0.00135486
Alkbh8	-0.306569	0.00136007
Top2b	-0.239929	0.00136091
2610307P16Rik	-0.241927	0.00136321
2610035D17Rik	-0.364543	0.00136628
Supt16	-0.23717	0.00136813
5430431A17Rik	-0.634873	0.00137106
Fam227b	0.467436	0.00137293
Pitx1	0.391473	0.00137293
Ntng2	0.767765	0.001375
Tchh	0.738843	0.00137641
Upp1	1.39564	0.00137641
Odf2l	-0.297568	0.0013776
Proser2	0.475	0.00137936
Syt4	0.900536	0.00138277
Nucks1	-0.276619	0.00138497
Tmem150a	0.415406	0.00139016
Slc12a7	-0.412244	0.00139594
Ptprt	0.38491	0.00140121
Cd63	0.369899	0.00140483
Gpr45	-0.412822	0.00140483
Tmem47	-0.252352	0.00140534
Pon2	0.374381	0.00140548
Anpep	0.452494	0.00141001
Tnni1	0.655363	0.00141095
Nrg3os	-0.76357	0.00141691
Acaa2	0.330631	0.00144466
Gm15397	-1.15147	0.00144632
Epb41l5	-0.330838	0.00145002
Zfp804a	0.549839	0.00145105
D430041D05Rik	0.375659	0.00145958
Nuak2	0.936735	0.00145958
Tnfsf12	0.395733	0.0014668
Gm10830	2.47274	0.00146869
Zfp101	-0.287125	0.00146869
Neurod2	1.21158	0.0014767
Tnfaip3	0.677814	0.00149341
Gabra5	1.05504	0.00149713
Sart3	-0.289977	0.00149781
Ppp2r2c	1.35142	0.00149872
Gm12526	-0.602255	0.00150759
St3gal3	-0.293392	0.00150766
Fignl1	-0.35774	0.00151744
Rspo4	1.02361	0.0015377
Tekt2	0.573354	0.00154795
Gprin1	1.03687	0.00155769
Lingo2	0.335633	0.00156217
Brd1	-0.276945	0.00156898
Star	-0.445583	0.00156901
Caprin1	-0.244381	0.00159195
Gm41335	-0.856834	0.00159447
Resf1	-0.276781	0.00159471
Zmym2	-0.228633	0.00159573
Tpr	-0.253164	0.00159578
Zadh2	0.361832	0.00160033
B3galt1	-0.229148	0.00161033
Sgms2	0.480992	0.00161182
Togaram1	-0.262633	0.00161738
Kcne1l	0.454411	0.00162129
Tagln2	0.442188	0.00162176
Dpp10	-0.349822	0.00163378
Col15a1	0.439589	0.00163378
Grhl2	0.715701	0.00163628
Pdgfrb	-0.294953	0.00164568
Coq10b	0.291351	0.00164981
Fst	0.388333	0.00165453
Ephb3	-0.371136	0.00167103
Cstf3	-0.239091	0.00167103
Zfp326	-0.226728	0.00167167
Celsr2	0.494994	0.00167406
Bub1b	-0.328032	0.00167406
Wdr72	1.2173	0.00168831
Mroh3	-0.68865	0.00168831
Angptl4	0.526147	0.00169263
Vamp4	0.253659	0.00169263
Arsg	0.464349	0.00169263
Parp4	0.491493	0.00169565
Zfp710	-0.305157	0.00170338
Lmo4	-0.279656	0.00171537
Lmo3	0.469693	0.00172224
Dtx3l	0.899113	0.00172411
Klc2	-0.425514	0.00172857
Kif2c	-0.424947	0.00173293
Col25a1	-0.325507	0.0017567
Fam72a	-0.626463	0.00175882
Ikzf3	0.856224	0.00176404
Topbp1	-0.246664	0.00176817
H2afz	-0.402888	0.00177236
Pbx3	-0.260948	0.00177236
Cttnbp2nl	-0.322414	0.00177284
[truncated: 18,489 more rows]
