# Supplementary material for: Eed controls craniofacial osteoblast differentiation and mesenchymal proliferation from the neural crest
Source: eLife. 2025 Dec 2;13:RP100159. doi: 10.7554/eLife.100159 (PMC12671911; doi:10.7554/eLife.100159)
Supplement: Supplementary file 7. [file elife-100159-supp7.xlsx]

## Sheet: Supplementary_File_7
Supplementary File 7. Methylation rank and nearest gene coordinates from CUT&Tag H3K27me3 sequencing of E12.5 Sox10-Cre; EedFl/WT craniofacial tissues.
Chromosome	START	STOP	CONSTITUENT_SIZE	E12.5_WT_merged.bam	Methylation rank	Is past inflection point	nearestEntrez	nearestGene
17	39840700	39849800	9100	575910	1	1	100861531	Rn45s
15	102899600	103187700	288100	464989	2	1	751557	Mir615
6	52146100	52297950	151850	354377	3	1	791364	Hottip
11	96241550	96384700	143150	300055	4	1	75395	Hoxb5os
2	74641750	74767500	125750	280848	5	1	73429	Hoxd3os1
11	3125100	3200400	75300	210047	6	1	78887	Sfi1
7	79484450	79562950	78500	145931	7	1	723968	Mir9-3
4	115874200	115987950	113750	143101	8	1	76237	Tmem275
5	147258000	147323950	65950	125657	9	1	70147	Plut
8	121054000	121135100	81100	122038	10	1	68790	Fendrr
9	91345150	91424250	79100	122020	11	1	22774	Zic4
8	71647850	71732950	85100	114229	12	1	74015	Fcho1
2	105647350	105696500	49150	113981	13	1	402728	Pax6os1
19	44716500	44772450	55950	110297	14	1	18504	Pax2
14	63231000	63278200	47200	110187	15	1	14463	Gata4
3	88190050	88258750	68700	108443	16	1	58176	Rhbg
19	43569850	43630200	60350	107344	17	1	18089	Nkx2-3
5	119788200	119861900	73700	105142	18	1	21388	Tbx5
4	139785850	139857200	71350	103717	19	1	18509	Pax7
5	35359750	35414400	54650	103216	20	1	74429	4930478P22Rik
15	98766550	98813850	47300	103035	21	1	22410	Wnt10b
6	83682650	83727700	45050	95210.7	22	1	574519	Vax2os
4	152111700	152172050	60350	93978.1	23	1	85030	Tnfrsf25
17	85604200	85635100	30900	93821.3	24	1	20473	Six3
2	38334600	38381850	47250	93303.6	25	1	16870	Lhx2
19	45128950	45180650	51700	91978.7	26	1	21908	Tlx1
1	120590400	120634000	43600	91903.5	27	1	13798	En1
10	80292900	80365850	72950	91339	28	1	70335	Reep6
3	129190500	129234350	43850	91142.2	29	1	18741	Pitx2
2	165163750	165272750	109000	90616.6	30	1	104010	Cdh22
1	74767500	74817600	50100	86431.3	31	1	22420	Wnt6
13	40698950	40749350	50400	83247.8	32	1	21418	Tfap2a
2	148017050	148065600	48550	83199.6	33	1	15376	Foxa2
1	89915300	89953900	38600	82543.7	34	1	208372	Asb18
19	45218850	45251000	32150	81352.1	35	1	16814	Lbx1
8	12372500	12411600	39100	80952.2	36	1	434280	Sox1ot
5	106438000	106476800	38800	80470.5	37	1	104382	Barhl2
14	122444750	122494250	49500	80450.8	38	1	69248	2610035F20Rik
10	42559050	42598250	39200	80149.7	39	1	21907	Nr2e1
8	57309750	57357850	48100	77613.4	40	1	75996	Hdnr
16	91210700	91248800	38100	77352.4	41	1	50913	Olig2
5	29460250	29494750	34500	76572.7	42	1	15285	Mnx1
10	80476150	80517150	41000	75983.2	43	1	246086	Onecut3
9	63130800	63163250	32450	75978.6	44	1	207667	Skor1
4	135134000	135183500	49500	75867.7	45	1	12399	Runx3
5	139530100	139567700	37600	75665.2	46	1	74973	4930500L23Rik
4	89267350	89316800	49450	75477.1	47	1	12579	Cdkn2b
6	6843450	6885700	42250	75143.9	48	1	320038	Dlx6os1
5	120387500	120441300	53800	74260.7	49	1	16873	Lhx5
16	94072550	94102150	29600	74252.2	50	1	20465	Sim2
1	155711450	155755400	43950	73137.2	51	1	16872	Lhx4
10	127503150	127560900	57750	72843.4	52	1	407790	Ndufa4l2
7	131527550	131564550	37000	72410.5	53	1	15373	Hmx3
11	119033150	119068400	35250	72254.4	54	1	30951	Cbx8
9	74837650	74870750	33100	72094.3	55	1	15379	Onecut1
4	109966350	109997400	31050	71483.5	56	1	242620	Dmrta2
2	9867500	9903700	36200	70952.8	57	1	77682	Gata3un
3	34635650	34675600	39950	70753	58	1	320478	Sox2ot
1	184711200	184737900	26700	70690.9	59	1	74971	4930488B22Rik
7	24926350	24958300	31950	70533.9	60	1	232974	Erfl
12	111403250	111463650	60400	70202.2	61	1	74190	Exoc3l4
2	31624000	31660200	36200	70066.4	62	1	381359	Prdm12
17	26825650	26865900	40250	70017.9	63	1	18091	Nkx2-5
5	41741600	41772700	31100	69562.6	64	1	12020	Nkx3-2
12	56509800	56548350	38550	67552.8	65	1	21869	Nkx2-1
19	37681600	37708000	26400	67274.7	66	1	546726	Cyp26c1
3	99231400	99270300	38900	66860.1	67	1	70560	Wars2
4	114895200	114936400	41200	66112.2	68	1	30923	Foxe3
8	69867250	69901000	33750	66080.7	69	1	80720	Pbx4
6	88184350	88210950	26600	65526.5	70	1	14461	Gata2
2	71519350	71556350	37000	65387.5	71	1	66559	Metap1d
2	147172450	147201850	29400	65330.2	72	1	78068	6430503K07Rik
4	44692350	44722050	29700	64888.3	73	1	70602	5730488B01Rik
6	83057700	83094650	36950	64422.6	74	1	93838	Dqx1
1	42682250	42727500	45250	64314.9	75	1	66620	Pantr2
12	57528850	57557850	29000	63649.8	76	1	15375	Foxa1
11	84511800	84537300	25500	63036.4	77	1	78365	Lhx1os
13	31606400	31635200	28800	62560.1	78	1	71307	1700018A04Rik
17	85449900	85495750	45850	62102.2	79	1	73582	Camkmt
11	95116600	95153800	37200	61929.2	80	1	320453	Dlx4os
11	97522950	97583250	60300	61907.4	81	1	56013	Srcin1
19	44630500	44703700	73200	61772.1	82	1	102465114	Mir3084-2
11	33188800	33215350	26550	61599.3	83	1	66011	Ranbp17
13	55815450	55850450	35000	61378.4	84	1	18740	Pitx1
7	45153900	45201900	48000	60969.6	85	1	72961	Slc17a7
9	98939950	98976100	36150	60891.2	86	1	768252	Foxl2os
13	73255650	73278750	23100	60574.1	87	1	50916	Irx4
2	36077250	36114350	37100	60421.5	88	1	75495	Morn5
19	59444800	59480850	36050	60050	89	1	329078	Emx2os
2	19427300	19458650	31350	59931	90	1	19213	Ptf1a
14	12332450	12360400	27950	59442.5	91	1	54713	Fezf2
14	48648000	48681250	33250	59262.3	92	1	606497	Otx2os1
15	75991950	76020250	28300	59244.4	93	1	432964	Iqank1
10	50887750	50916450	28700	58395.3	94	1	20464	Sim1
5	98164250	98192450	28200	57664.9	95	1	77630	Prdm8
13	72618600	72644050	25450	57018.8	96	1	328287	Gm20554
6	85178850	85209750	30900	57008.4	97	1	13796	Emx1
7	44303150	44367250	64100	56979.4	98	1	69349	1700008O03Rik
18	64324750	64352500	27750	56816	99	1	73588	St8sia3os
2	105116000	105143300	27300	55812.2	100	1	329480	Wt1os
2	147349900	147380700	30800	55713.4	101	1	99041	AI646519
5	119647400	119691850	44450	55395.6	102	1	433944	Tbx3os2
19	25595300	25626650	31350	55320.9	103	1	50796	Dmrt1
11	21985100	22009300	24200	54599.7	104	1	216565	Ehbp1
5	75065600	75088950	23350	54397.3	105	1	14843	Gsx2
13	83710000	83743050	33050	53967.6	106	1	723967	Mir9-2
11	57823100	57852050	28950	53943.3	107	1	15110	Hand1
6	23240400	23276250	35850	53925.2	108	1	73191	Fezf1
4	22474300	22502650	28350	53914.3	109	1	18992	Pou3f2
13	94859850	94892850	33000	53436.7	110	1	18420	Otp
5	33424350	33447550	23200	52984.8	111	1	672284	Nkx1-1
15	99575800	99616850	41050	52907.6	112	1	11831	Aqp6
5	37811200	37839950	28750	52820.2	113	1	17701	Msx1
3	127621600	127648100	26500	52560.2	114	1	11924	Neurog2
8	105257200	105281050	23850	52553.4	115	1	78688	Nol3
2	26181700	26213500	31800	51516.4	116	0	227638	Qsox2
5	101643850	101671400	27550	51454.4	117	0	18096	Nkx6-1
12	56674750	56703550	28800	51324.8	118	0	18511	Pax9
5	107712500	107736650	24150	51162	119	0	14581	Gfi1
4	115044650	115070700	26050	51050.7	120	0	21349	Tal1
11	115236650	115277950	41300	50903.8	121	0	320534	Tmem104
9	69748500	69775650	27150	50295.6	122	0	64290	Foxb1
2	28904600	28927650	23050	50132.5	123	0	54422	Barhl1
12	49367050	49408950	41900	49829.5	124	0	67293	3110039M20Rik
5	67207750	67237750	30000	49694.8	125	0	67878	Tmem33
4	125472300	125503400	31100	49516.4	126	0	14807	Grik3
7	70318750	70361200	42450	49425.1	127	0	624549	Gm29683
4	21665750	21699050	33300	49329.6	128	0	230025	Prdm13
11	85878500	85905950	27450	49082.1	129	0	21387	Tbx4
9	24762350	24784400	22050	48974.9	130	0	57246	Tbx20
13	78160650	78215050	54400	48660	131	0	68675	Fam172a
9	21011300	21044450	33150	48368.7	132	0	78369	Icam4
9	99860600	99882800	22200	48046.3	133	0	20669	Sox14
2	122290250	122321800	31550	48036.7	134	0	99439	Duox1
16	18572750	18592450	19700	47789.3	135	0	21380	Tbx1
10	19344850	19368750	23900	47750.1	136	0	94222	Olig3
18	76841200	76867850	26650	47363.5	137	0	664805	Skor2
2	158604650	158623850	19200	46830.1	138	0	22348	Slc32a1
1	19205150	19244250	39100	46624.4	139	0	21419	Tfap2b
13	48651750	48677250	25500	46418.6	140	0	12022	Barx1
1	88216500	88293100	76600	46371.5	141	0	94284	Ugt1a6a
13	71946400	71974100	27700	46213.8	142	0	16371	Irx1
5	28447350	28475500	28150	44910.2	143	0	654796	9530036O11Rik
14	118220900	118241800	20900	44800.1	144	0	223227	Sox21
4	46331050	46357350	26300	44723	145	0	110805	Foxe1
14	69164550	69197850	33300	44583.4	146	0	73554	1700092C10Rik
4	99644600	99668950	24350	44420.5	147	0	15221	Foxd3
15	75707450	75752350	44900	44256.3	148	0	378435	Mafa
9	118465450	118493900	28450	44253.7	149	0	13813	Eomes
1	138831050	138852000	20950	44210.7	150	0	69549	2310009B15Rik
13	112976450	113001200	24750	43868.1	151	0	622408	Mcidas
8	84908100	84962450	54350	43840	152	0	69724	Rnaseh2a
7	139573100	139592550	19450	43728.5	153	0	212111	Inpp5a
18	42374900	42404950	30050	43028.9	154	0	18998	Pou4f3
17	8423800	8443900	20100	42991.8	155	0	20997	T
2	38691400	38716550	25150	42922.2	156	0	26423	Nr5a1
12	118833650	118858600	24950	42812.9	157	0	320145	Sp8
13	116292100	116318250	26150	42758.8	158	0	16392	Isl1
2	164927200	164974550	47350	42712.5	159	0	57138	Slc12a5
2	70555450	70575450	20000	42397.3	160	0	68986	Gad1os
18	11043100	11064050	20950	42357.5	161	0	68434	Gata6os
4	120249950	120292050	42100	42228	162	0	329934	Foxo6
1	56967550	56990300	22750	42039.1	163	0	329160	9130024F11Rik
10	42612700	42640850	28150	41939	164	0	14628	Ostm1
7	140042100	140068400	26300	41810.7	165	0	17703	Msx3
6	30166200	30187750	21550	41287.1	166	0	723886	Mir96
14	67217500	67242500	25000	41096.1	167	0	13592	Ebf2
19	16864450	16879850	15400	41029.8	168	0	14240	Foxb2
19	45729750	45751400	21650	40991.3	169	0	76055	Oga
11	85810450	85849700	39250	40950.5	170	0	69909	2610027K06Rik
17	56111800	56158800	47000	40898.8	171	0	76905	Lrg1
2	160348000	160373550	25550	40730.1	172	0	16658	Mafb
7	30449050	30469250	20200	40634.3	173	0	54631	Nphs1
18	53458150	53477450	19300	40592.8	174	0	225518	Prdm6
18	80968650	80998350	29700	40473.5	175	0	20689	Sall3
2	73260750	73282950	22200	40393.5	176	0	381373	Sp9
14	104456300	104480450	24150	40039.4	177	0	72486	Obi1
1	63242950	63276550	33600	39950.9	178	0	73884	Zdbf2
12	56601450	56620600	19150	39160.2	179	0	18094	Nkx2-9
1	4486400	4504100	17700	39007.6	180	0	20671	Sox17
19	59157650	59181450	23800	38882.3	181	0	22326	Vax1
15	74505400	74549700	44300	38646.1	182	0	107831	Adgrb1
17	85672800	85697150	24350	38626.9	183	0	20472	Six2
12	8289400	8322300	32900	38608.2	184	0	58240	Hs1bp3
13	31795100	31827900	32800	38317	185	0	218138	Gmds
12	117145600	117163650	18050	38280.6	186	0	19276	Ptprn2
4	148157500	148179850	22350	37935.2	187	0	230904	Fbxo2
9	55533750	55550750	17000	37811.3	188	0	244891	Scaper
8	120872400	120909650	37250	37787.7	189	0	108148	Galnt2
2	18673800	18706600	32800	37748.2	190	0	381350	Spag6
17	34181950	34217900	35950	37587	191	0	21355	Tap2
2	84861100	84894050	32950	37576.6	192	0	72401	Slc43a1
4	152267350	152296350	29000	37575.9	193	0	70025	Acot7
14	32451050	32470700	19650	37280.9	194	0	20508	Slc18a3
9	58192900	58206250	13350	37146.4	195	0	665268	1600029O15Rik
19	46129350	46155250	25900	36797.3	196	0	18742	Pitx3
11	101158150	101190450	32300	36783.7	197	0	53321	Cntnap1
8	78417450	78442700	25250	36587.8	198	0	18997	Pou4f2
19	46302650	46333500	30850	36247.1	199	0	73728	Psd
X	93275250	93303850	28600	36217.8	200	0	11878	Arx
12	111262850	111278100	15250	36053	201	0	93835	Amn
19	25663400	25681950	18550	36009.2	202	0	226049	Dmrt2
15	85566050	85602050	36000	35888.8	203	0	22422	Wnt7b
18	65923300	65950250	26950	35869.7	204	0	19434	Rax
3	96388200	96413500	25300	35693.6	205	0	21748	Terc
7	49899300	49924100	24800	35673.2	206	0	104245	Slc6a5
2	131545300	131571850	26550	35653.5	207	0	11550	Adra1d
12	110260650	110285650	25000	35607	208	0	353504	Dio3os
5	135846350	135878650	32300	35605.6	209	0	58212	Srrm3
7	137298700	137335250	36550	35486.8	210	0	13593	Ebf3
9	107365450	107407900	42450	35309.9	211	0	56808	Cacna2d2
13	53453900	53483400	29500	35255.6	212	0	17702	Msx2
5	67087600	67113500	25900	35151.8	213	0	18935	Phox2b
13	98348700	98372350	23650	35090.5	214	0	15229	Foxd1
2	119739000	119763150	24150	34984.5	215	0	228550	Itpka
13	36717400	36738450	21050	34777.4	216	0	69955	Fars2
2	119309400	119338800	29400	34740.7	217	0	54485	Dll4
10	84750850	84764750	13900	34490.5	218	0	71137	Rfx4
1	136943000	136963700	20700	34447.1	219	0	26424	Nr5a2
2	146826150	146843300	17150	34433.1	220	0	228730	Kiz
2	61800500	61818600	18100	34424.9	221	0	21375	Tbr1
7	142073450	142103300	29850	34358.4	222	0	18218	Dusp8
11	95821450	95839450	18000	34003.1	223	0	66610	Abi3
9	40868350	40892400	24050	33985.9	224	0	244813	Bsx
12	108302900	108345800	42900	33967.3	225	0	214305	Hhipl1
14	63932800	63953550	20750	33893.4	226	0	20680	Sox7
8	84008100	84046800	38700	33853.6	227	0	74337	Palm3
19	6918300	6936750	18450	33456.8	228	0	67077	Catsperz
5	139903400	139921850	18450	33245.3	229	0	243312	Elfn1
4	9837800	9863850	26050	33230.2	230	0	242316	Gdf6
7	27353700	27382500	28800	33197.5	231	0	80297	Sptbn4
2	57095950	57118250	22300	33125.6	232	0	18227	Nr4a2
7	49625950	49643550	17600	33085.2	233	0	13172	Dbx1
5	147180250	147201850	21600	33040.3	234	0	14842	Gsx1
11	5053550	5067350	13800	32802.5	235	0	78926	Gas2l1
11	68383000	68404850	21850	32742.5	236	0	18208	Ntn1
8	94170500	94191000	20500	32730.2	237	0	17750	Mt2
3	107577000	107606400	29400	32691.1	238	0	11694	Alx3
5	28116100	28139800	23700	32664.7	239	0	13799	En2
5	31084500	31101000	16500	32619.4	240	0	22784	Slc30a3
11	119539050	119561900	22850	32526.8	241	0	18164	Nptx1
14	32586150	32610800	24650	32488.7	242	0	107751	Drgx
8	92352050	92371100	19050	32033.1	243	0	71296	Crnde
11	96990250	97029400	39150	31937.3	244	0	83395	Sp6
10	87480900	87509500	28600	31778.3	245	0	17172	Ascl1
2	130568850	130585100	16250	31632.2	246	0	18429	Oxt
3	96319500	96345900	26400	31332.3	247	0	100504145	Platr30
3	17783000	17799550	16550	31326.7	248	0	723950	Mir124a-2
8	91795150	91813000	17850	31190.8	249	0	16373	Irx3
15	79493400	79521900	28500	31143	250	0	16520	Kcnj4
2	172536350	172557900	21550	31120.7	251	0	21420	Tfap2c
18	60997750	61050800	53050	31106.5	252	0	240332	Slc6a7
11	53452850	53482950	30100	30941.6	253	0	71774	Shroom1
1	187600250	187613150	12900	30840.1	254	0	26381	Esrrg
10	127164250	127191750	27500	30683	255	0	80904	Dtx3
12	84565650	84580400	14750	30492.6	256	0	12677	Vsx2
15	102726500	102757550	31050	30437.3	257	0	67488	Calcoco1
13	94698350	94716750	18400	30406.4	258	0	21371	Tbca
9	87722800	87746550	23750	30383.8	259	0	76365	Tbx18
7	70275900	70292000	16100	30225.3	260	0	624549	Gm29683
15	7802800	7822250	19450	30200.5	261	0	14573	Gdnf
10	22148200	22164000	15800	30100.8	262	0	667281	H60b
8	70481500	70514400	32900	30079.1	263	0	75620	Kxd1
11	83840700	83861150	20450	30065.4	264	0	21410	Hnf1b
15	99219050	99239500	20450	30044.7	265	0	16512	Kcnh3
8	70369550	70390250	20700	29838.4	266	0	382056	Crtc1
2	146211800	146230000	18200	29814.3	267	0	78774	Cfap61
12	72934600	72952250	17650	29746.9	268	0	75801	4930447C04Rik
15	35290500	35307550	17050	29740.6	269	0	107587	Osr2
11	49605600	49641800	36200	29737.8	270	0	14257	Flt4
X	58012650	58035100	22450	29645.2	271	0	22773	Zic3
2	180884850	180903000	18150	29389.8	272	0	723951	Mir124a-3
8	70080450	70092600	12150	29238.6	273	0	330790	Hapln4
15	82201100	82220100	19000	29155.4	274	0	435145	Shisa8
10	81225350	81269500	44150	28948.1	275	0	66047	Mrpl54
8	120924600	120977100	52500	28900.4	276	0	108148	Galnt2
5	24521150	24542350	21200	28878.2	277	0	231044	Gbx1
1	13117900	13136150	18250	28820.7	278	0	383491	Prdm14
12	109021050	109062450	41400	28798	279	0	380785	Begain
1	120331450	120350300	18850	28708.4	280	0	226359	C1ql2
4	124643450	124676700	33250	28682.4	281	0	18991	Pou3f1
14	64572850	64597900	25050	28625	282	0	387233	Mir124a-1
7	19512400	19530050	17650	28599.7	283	0	69547	Nkpd1
2	118882600	118905700	23100	28590.2	284	0	56357	Ivd
6	64724150	64741400	17250	28570.5	285	0	11921	Atoh1
19	44499950	44522150	22200	28563.6	286	0	240667	Sec31b
4	126728100	126740400	12300	28434.4	287	0	332937	Tfap2e
19	24895000	24906850	11850	28402.1	288	0	14237	Foxd4
2	93631000	93657450	26450	28343.8	289	0	11695	Alx4
8	92668250	92686600	18350	28185.2	290	0	64379	Irx6
3	154321900	154343200	21300	28159.1	291	0	99686	AI606473
10	22811200	22828100	16900	28106.7	292	0	21412	Tcf21
19	6479300	6508850	29550	28056	293	0	18190	Nrxn2
17	23731950	23751950	20000	28015.7	294	0	76498	Paqr4
8	87460900	87476200	15300	28010	295	0	12404	Cbln1
11	118542500	118579350	36850	27998.1	296	0	52897	Rbfox3
12	73036950	73056700	19750	27980	297	0	20471	Six1
1	190166850	190179250	12400	27793.3	298	0	19130	Prox1
2	25572350	25589450	17100	27563	299	0	75454	Phpt1
12	9569600	9587650	18050	27548.7	300	0	69420	1700022H16Rik
9	119557350	119583200	25850	27542.6	301	0	20271	Scn5a
16	18614550	18635550	21000	27529.6	302	0	18951	Septin5
5	36861200	36879850	18650	27394	303	0	71054	Ppp2r2cos
10	67529900	67543750	13850	27380.2	304	0	13654	Egr2
6	8946050	8960450	14400	27370.9	305	0	18231	Nxph1
9	122564150	122577900	13750	27336.4	306	0	319626	9530059O14Rik
14	34812350	34827000	14650	27136.6	307	0	14803	Grid1
4	138383900	138404450	20550	27113.9	308	0	625638	Fam43b
2	131035650	131067850	32200	27096.6	309	0	14588	Gfra4
5	143354550	143382600	28050	26975.6	310	0	170935	Grid2ip
5	108362850	108375650	12800	26957.7	311	0	77560	9330198I05Rik
11	70210900	70232300	21400	26863.1	312	0	69309	Slc16a13
3	66963850	66988850	25000	26797.6	313	0	66880	Rsrc1
2	181130800	181161750	30950	26734.2	314	0	16536	Kcnq2
14	79764850	79776800	11950	26617.2	315	0	18530	Pcdh8
14	70072400	70089450	17050	26566.5	316	0	13655	Egr3
2	94235850	94253850	18000	26512.2	317	0	723953	Mir129-2
11	4733600	4756900	23300	26484.3	318	0	67178	Zmat5
2	22615050	22632200	17150	26437.8	319	0	667663	Myo3a
10	52017900	52033250	15350	26334	320	0	215031	Vgll2
5	35271600	35287050	15450	26278.9	321	0	11553	Adra2c
4	124966900	124992500	25600	26265.3	322	0	192199	Rspo1
4	124877150	124903650	26500	26133.3	323	0	73628	1700125G02Rik
19	6820500	6851900	31400	26109.6	324	0	78317	Ccdc88b
5	147713550	147734700	21150	26004.2	325	0	14254	Flt1
4	154947150	154968850	21700	25946.1	326	0	269614	Pank4
11	87757300	87770100	12800	25937.3	327	0	207777	Tspoap1
15	98890150	98900050	9900	25923.1	328	0	69159	Rhebl1
17	27500400	27524800	24400	25691.1	329	0	268934	Grm4
3	107449550	107469050	19500	25654.6	330	0	99738	Kcnc4
7	144834300	144848900	14600	25251.4	331	0	14175	Fgf4
1	135908700	135932150	23450	25115.2	332	0	18772	Pkp1
10	127037600	127070950	33350	25112.4	333	0	67125	Tspan31
9	57495350	57511900	16550	25078.9	334	0	102614	Rpp25
19	44827100	44845100	18000	24789.5	335	0	73322	1700039E22Rik
2	70468650	70481950	13300	24766.9	336	0	64406	Sp5
7	28283200	28304200	21000	24416	337	0	280621	Selenov
8	70725750	70750850	25100	24402.3	338	0	110385	Pde4c
7	45404650	45426300	21650	24286	339	0	78405	Ntf5
7	98824200	98848050	23850	24157.4	340	0	22411	Wnt11
15	76510450	76526100	15650	24156.5	341	0	170729	Scrt1
5	143249300	143262450	13150	24086.6	342	0	54201	Zfp316
2	180767800	180780750	12950	24014.7	343	0	140489	Bhlhe23
17	45526500	45552700	26200	23982.4	344	0	21645	Tcte1
8	46285250	46299900	14650	23943.6	345	0	234219	Helt
4	140233700	140253500	19800	23854.4	346	0	230868	Igsf21
2	152072950	152100000	27050	23693.1	347	0	545474	Scrt2
4	11380550	11395050	14500	23651.7	348	0	207920	Esrp1
19	37429750	37443050	13300	23459.2	349	0	15242	Hhex
6	91397500	91424200	26700	23430.3	350	0	22421	Wnt7a
2	180327550	180348600	21050	23405.5	351	0	14464	Gata5
13	54933050	54963400	30350	23359.9	352	0	107448	Unc5a
17	15367650	15386250	18600	23336.7	353	0	13388	Dll1
7	132591150	132607850	16700	23333.6	354	0	20231	Nkx1-2
19	5549250	5574050	24800	23276.6	355	0	381201	Ap5b1
11	75158300	75175100	16800	23260.8	356	0	387208	Mir212
11	6058550	6073100	14550	23244	357	0	12323	Camk2b
10	79906000	79928300	22300	23192.5	358	0	216154	Med16
13	31553000	31575200	22200	23191.2	359	0	71307	1700018A04Rik
18	80695650	80721100	25450	22996.5	360	0	18018	Nfatc1
12	99957900	99970400	12500	22904.2	361	0	217826	Kcnk13
5	138985800	139002800	17000	22900	362	0	18590	Pdgfa
2	155616600	155638900	22300	22734.8	363	0	735275	Mir499
12	104462400	104487200	24800	22734.6	364	0	14836	Gsc
7	101811650	101825200	13550	22660.8	365	0	16332	Inppl1
2	25283800	25299450	15650	22561	366	0	99152	Anapc2
11	102936400	102957050	20650	22553.8	367	0	23829	C1ql1
2	164398550	164416400	17850	22521.4	368	0	19668	Rbpjl
3	102006650	102026550	19900	22413.8	369	0	18072	Nhlh2
1	119415800	119427950	12150	22361.5	370	0	16324	Inhbb
4	154131200	154144150	12950	22235.4	371	0	59002	Wrap73
9	31907200	31921650	14450	22190.4	372	0	12023	Barx2
2	24466600	24481250	14650	22182	373	0	18510	Pax8
15	89367650	89389750	22100	22160.5	374	0	72962	Tymp
9	21236350	21253700	17350	22088.6	375	0	94226	S1pr5
9	37420500	37439350	18850	22023.3	376	0	19649	Robo3
2	29244150	29263350	19200	22005.2	377	0	76220	6530402F18Rik
11	82382250	82393350	11100	21964.8	378	0	270893	Tmem132e
4	117483650	117502200	18550	21826.8	379	0	66743	Rnf220
15	101037750	101059800	22050	21783.9	380	0	668225	Fignl2
12	110180600	110197150	16550	21739.4	381	0	67280	3110009F21Rik
11	82924950	82942950	18000	21722.8	382	0	76392	Slfn5os
7	44580950	44610550	29600	21689.6	383	0	71960	Myh14
5	112557400	112593100	35700	21621.9	384	0	67325	1700034G24Rik
4	48044150	48055350	11200	21609.3	385	0	18124	Nr4a3
11	12017800	12051950	34150	21595.6	386	0	14783	Grb10
3	83122850	83138600	15750	21515.7	387	0	100534287	Dchs2
4	134241200	134260200	19000	21467.6	388	0	77490	Zfp593os
11	59167400	59190800	23400	21464.3	389	0	14923	Guk1
18	38204350	38217600	13250	21460.6	390	0	75599	Pcdh1
8	14089600	14103100	13500	21350.6	391	0	244310	Dlgap2
18	35648100	35659250	11150	21329	392	0	71242	Spata24
4	41721700	41732100	10400	21320	393	0	550619	Arid3c
2	25385400	25410550	25150	21262.4	394	0	18146	Npdc1
18	82401200	82410650	9450	21214.7	395	0	14427	Galr1
1	19093950	19115600	21650	21203.7	396	0	226896	Tfap2d
11	76662050	76678550	16500	21178.6	397	0	320522	Bhlha9
17	32386450	32405200	18750	21111.9	398	0	664702	A530088E08Rik
4	123175200	123205950	30750	21075.2	399	0	230718	Nt5c1a
11	114774700	114799500	24800	20970.2	400	0	72014	Btbd17
4	117297900	117324850	26950	20962	401	0	66743	Rnf220
7	116028250	116042950	14700	20893.8	402	0	68469	Sox6os
4	148801450	148820050	18600	20840.6	403	0	69743	Casz1
5	139654250	139689850	35600	20789.3	404	0	231830	Micall2
9	21982900	21996850	13950	20665.3	405	0	77609	Odad3
7	110623550	110633150	9600	20614.4	406	0	11535	Adm
11	103354600	103368500	13900	20596.2	407	0	544817	Arhgap27
1	74845550	74864700	19150	20587.7	408	0	12570	Cdk5r2
9	37523900	37535100	11200	20581.1	409	0	69524	Esam
9	89864750	89894000	29250	20486.3	410	0	74700	4930524O08Rik
6	55111450	55126950	15500	20418.4	411	0	12922	Crhr2
4	141234450	141257600	23150	20410.8	412	0	213649	Arhgef19
17	87789500	87801150	11650	20390.5	413	0	210741	Kcnk12
5	118160200	118179750	19550	20358.3	414	0	12123	Hrk
12	112125400	112149150	23750	20334.3	415	0	668303	Kif26a
18	36316450	36330050	13600	20320.3	416	0	66060	Cystm1
7	81444750	81461850	17100	20312.8	417	0	12877	Cpeb1
15	31359750	31375900	16150	20259.9	418	0	67434	Ankrd33b
11	118902050	118913600	11550	20255.1	419	0	52897	Rbfox3
5	125527400	125538200	10800	20169	420	0	208151	Tmem132b
6	51168650	51195350	26700	20112.8	421	0	387166	Mir148a
6	91278600	91295500	16900	20078	422	0	14115	Fbln2
4	136232950	136251000	18050	20028.4	423	0	230837	Asap3
1	172324100	172358250	34150	20013.3	424	0	16524	Kcnj9
4	41490100	41503950	13850	19953.9	425	0	329828	Myorg
5	31127700	31142900	15200	19904.8	426	0	58522	Trim54
5	37886300	37924000	37700	19899.3	427	0	102637176	Gm20052
7	78572900	78588050	15150	19851.9	428	0	414121	E430016F16Rik
11	59129200	59145350	16150	19838.5	429	0	380698	Obscn
4	120721800	120753000	31200	19826	430	0	60613	Kcnq4
5	106556450	106578600	22150	19710.2	431	0	52397	Zfp644
11	103644900	103658750	13850	19686.9	432	0	104582	Rprml
1	132185800	132214450	28650	19637.7	433	0	723818	Mir135b
15	79150450	79182800	32350	19607.3	434	0	69833	Polr2f
10	60676550	60695950	19400	19607	435	0	22295	Cdh23
5	30096700	30119350	22650	19586.9	436	0	97212	Hadha
14	58068150	58081650	13500	19550.4	437	0	14180	Fgf9
7	51620550	51633850	13300	19541.2	438	0	140919	Slc17a6
15	72536500	72555350	18850	19479.5	439	0	223604	Kcnk9
11	102141400	102150750	9350	19467.1	440	0	217214	Nags
4	136889600	136918350	28750	19356.9	441	0	12262	C1qc
7	63752400	63763400	11000	19328.3	442	0	170711	Otud7a
12	86417200	86428650	11450	19319.2	443	0	26380	Esrrb
2	118669000	118684300	15300	19310	444	0	214230	Pak6
8	124781600	124803500	21900	19285.4	445	0	330863	Trim67
7	27321150	27340500	19350	19285.2	446	0	108075	Ltbp4
15	89053800	89073950	20150	19279	447	0	83456	Mov10l1
6	85508000	85521250	13250	19241.3	448	0	13656	Egr4
8	122668050	122700950	32900	19220.2	449	0	12398	Cbfa2t3
11	95569100	95602300	33200	19218	450	0	18053	Ngfr
8	123881800	123899300	17500	19216.9	451	0	234865	Nup133
8	4201850	4222700	20850	19176.8	452	0	73072	Prr36
7	44429000	44448000	19000	19159.3	453	0	272381	Lrrc4b
17	8797400	8811050	13650	19148.5	454	0	23984	Pde10a
5	143278500	143299550	21050	19137.5	455	0	330230	Zfp853
2	170488800	170504950	16150	19104.6	456	0	13081	Cyp24a1
6	119311150	119333800	22650	19069	457	0	319734	Cacna2d4
7	3408700	3427850	19150	18972.5	458	0	81905	Cacng8
6	70946350	70962350	16000	18970.8	459	0	232077	Foxi3
14	66632400	66647350	14950	18923.6	460	0	11549	Adra1a
9	45428650	45438250	9600	18910	461	0	74602	4833428L15Rik
2	172719650	172743900	24250	18865	462	0	12162	Bmp7
2	144324450	144337750	13300	18785.2	463	0	107586	Ovol2
8	84696450	84715350	18900	18735.4	464	0	212528	Trmt1
12	112867950	112882150	14200	18667.5	465	0	56696	Gpr132
6	114275000	114300400	25400	18602.5	466	0	232333	Slc6a1
16	9988450	9999850	11400	18596.8	467	0	14811	Grin2a
8	71552350	71575050	22700	18577.1	468	0	434325	Tmem221
6	87724450	87741550	17100	18561.7	469	0	58229	Efcc1
3	103567150	103583300	16150	18557.2	470	0	54524	Syt6
17	26409150	26443450	34300	18550.4	471	0	240055	Neurl1b
4	139067150	139095850	28700	18525.4	472	0	17965	Nbl1
3	30503200	30520700	17500	18523.7	473	0	14013	Mecom
11	66521250	66532050	10800	18500.6	474	0	380702	Shisa6
17	93197750	93207050	9300	18421	475	0	11516	Adcyap1
2	116056700	116079050	22350	18388.3	476	0	69974	2810405F15Rik
8	95669350	95696200	26850	18319.1	477	0	234593	Ndrg4
10	79995800	80022400	26600	18313	478	0	70719	Arhgap45
16	18773150	18783000	9850	18304.7	479	0	12741	Cldn5
11	4943250	4960300	17050	18279.1	480	0	380684	Nefh
14	70883450	70904500	21050	18170.9	481	0	14586	Gfra2
4	141282750	141307450	24700	18162.6	482	0	13836	Epha2
1	5014650	5027300	12650	18135.6	483	0	58175	Rgs20
1	127668350	127685650	17300	18109.8	484	0	72160	Tmem163
11	50846950	50858250	11300	18042.2	485	0	108072	Grm6
7	141941000	141960100	19100	18032.3	486	0	75770	Brsk2
4	45816950	45834000	17050	17996.9	487	0	75426	Igfbpl1
1	87257800	87271250	13450	17961.3	488	0	98363	Efhd1
4	46981650	47001550	19900	17957.9	489	0	242425	Gabbr2
7	142963600	142973750	10150	17950.9	490	0	17173	Ascl2
8	75201600	75222750	21150	17946.5	491	0	75141	Rasd2
9	45135000	45155650	20650	17931.6	492	0	399548	Scn4b
9	56615150	56648550	33400	17923.9	493	0	235402	Lingo1
4	109653050	109667800	14750	17869.5	494	0	12580	Cdkn2c
1	134640500	134653900	13400	17846.3	495	0	20980	Syt2
3	18048600	18061850	13250	17806.8	496	0	59058	Bhlhe22
8	122257050	122304400	47350	17786	497	0	22761	Zfpm1
14	21982000	21997900	15900	17726.8	498	0	218820	Zfp503
16	11977100	11992650	15550	17707.1	499	0	72555	Shisa9
16	20588000	20600500	12500	17657	500	0	328643	Vwa5b2
X	60886150	60905350	19200	17647.1	501	0	20675	Sox3
4	107429900	107448500	18600	17623.6	502	0	230587	Glis1
5	38272100	38285150	13050	17577.4	503	0	21906	Otop1
11	116279650	116287000	7350	17555.9	504	0	14428	Galr2
6	84571950	84592650	20700	17527.5	505	0	232174	Cyp26b1
11	120652350	120665900	13550	17527.1	506	0	77583	Notum
4	150024950	150042650	17700	17505.7	507	0	100198	H6pd
4	153473100	153491550	18450	17450.3	508	0	230959	Ajap1
2	152937500	152955300	17800	17366.9	509	0	252864	Dusp15
7	141450300	141472050	21750	17347.3	510	0	67186	Rplp2
2	163909000	163925450	16450	17266.2	511	0	241770	Rims4
10	19847650	19857300	9650	17239.7	512	0	76157	Slc35d3
1	191175000	191196800	21800	17149.3	513	0	11910	Atf3
2	79449950	79461650	11700	17143	514	0	228094	Cerkl
4	155032200	155052300	20100	17107.4	515	0	269615	Plch2
7	142650850	142668950	18100	17085.6	516	0	723874	Mir483
15	98163150	98178750	15600	17014	517	0	78541	Asb8
15	64916200	64928750	12550	16996.1	518	0	11514	Adcy8
7	143084650	143113950	29300	16993.2	519	0	56843	Trpm5
6	127764600	127774300	9700	16988.5	520	0	381813	Prmt8
19	7131350	7171200	39850	16920.3	521	0	107227	Macrod1
16	35530650	35547650	17000	16895	522	0	20357	Sema5b
6	67530000	67540800	10800	16864.3	523	0	56753	Tacstd2
19	42194650	42205200	10550	16862.9	524	0	54612	Sfrp5
5	98244500	98261450	16950	16861.8	525	0	14176	Fgf5
11	78481200	78504500	23300	16842.3	526	0	237868	Sarm1
2	148392150	148410850	18700	16808.1	527	0	21824	Thbd
6	31555000	31568050	13050	16761.3	528	0	27205	Podxl
5	33991200	34005950	14750	16729.1	529	0	269642	Nat8l
2	163848950	163868100	19150	16712.3	530	0	241770	Rims4
7	140918900	140927200	8300	16667.2	531	0	101613	Nlrp6
2	164163150	164174550	11400	16619.1	532	0	16538	Kcns1
8	121721250	121737600	16350	16612.1	533	0	57340	Jph3
5	93041100	93051550	10450	16595.6	534	0	78088	Sowahb
1	133157450	133186900	29450	16564.5	535	0	240753	Plekha6
5	37018650	37037700	19050	16552.7	536	0	76071	Jakmip1
15	89134550	89151200	16650	16543.7	537	0	29857	Mapk12
5	134983000	134991150	8150	16502.2	538	0	71304	Wbscr25
11	115853550	115867550	14000	16497.2	539	0	217325	Llgl2
7	46371900	46383750	11850	16470.4	540	0	17927	Myod1
15	95645550	95659850	14300	16468.2	541	0	223843	Dbx2
2	10364700	10379500	14800	16439.5	542	0	353282	Sfmbt2
7	4829300	4846000	16700	16423.6	543	0	67441	Isoc2b
7	40891050	40908300	17250	16378	544	0	58188	Vstm2b
7	31032100	31058800	26700	16370.8	545	0	57780	Fxyd7
17	56503500	56517000	13500	16330	546	0	20834	Znrf4
3	131100800	131115400	14600	16326.3	547	0	16842	Lef1
7	48952450	48983950	31500	16314.5	548	0	78286	Nav2
5	113283650	113317550	33900	16283.2	549	0	52850	Sgsm1
9	102346000	102357900	11900	16272.5	550	0	270190	Ephb1
6	38348750	38359250	10500	16227.9	551	0	78781	Zc3hav1
18	6999600	7009150	9550	16201.1	552	0	210719	Mkx
2	181667050	181676500	9450	16180.6	553	0	20672	Sox18
16	5124450	5137650	13200	16177.9	554	0	19041	Ppl
5	117835150	117847250	12100	16168	555	0	18125	Nos1
13	98495950	98508600	12650	16152.9	556	0	70090	2310005E17Rik
2	152037250	152056700	19450	16141.6	557	0	545474	Scrt2
11	103737300	103756400	19100	16130.4	558	0	22412	Wnt9b
7	135406450	135414000	7550	16116	559	0	270004	Foxi2
12	58206600	58216700	10100	16114.9	560	0	20605	Sstr1
11	116101450	116115150	13700	16099.7	561	0	217333	Trim47
9	108822500	108835250	12750	16098	562	0	107934	Celsr3
11	104127250	104141950	14700	16082.5	563	0	12921	Crhr1
7	25127250	25161000	33750	16078.4	564	0	434147	D930028M14Rik
7	123977300	123989850	12550	16076	565	0	628779	Hs3st4
9	56791600	56801750	10150	16070.1	566	0	235402	Lingo1
15	11031450	11040450	9000	16041.6	567	0	239336	Rxfp3
16	17911050	17918950	7900	16031.5	568	0	27886	Ess2
2	69579500	69592700	13200	16029.3	569	0	14725	Lrp2
7	131962300	131973100	10800	16024.9	570	0	233919	Gpr26
1	156199100	156208800	9700	15986.2	571	0	329274	Fam163a
6	112484050	112493950	9900	15983.6	572	0	18430	Oxtr
2	130354650	130369700	15050	15980	573	0	228598	Ebf4
8	11470500	11484950	14450	15953.3	574	0	19332	Rab20
9	8897250	8904650	7400	15930.1	575	0	18667	Pgr
12	98569800	98581550	11750	15927.3	576	0	72258	Kcnk10
9	121491600	121499700	8100	15914.1	577	0	12424	Cck
15	76225900	76238400	12500	15866.1	578	0	671535	Parp10
6	29525100	29532400	7300	15844.9	579	0	27056	Irf5
16	17795150	17808950	13800	15830.6	580	0	224024	Scarf2
7	130931350	130941800	10450	15805	581	0	56213	Htra1
17	25466800	25507300	40500	15804.9	582	0	71840	Tekt4
9	121632900	121647950	15050	15757.6	583	0	69032	Lyzl4
2	180094050	180109700	15650	15737.3	584	0	99296	Hrh3
2	37774500	37798900	24400	15727.4	585	0	241324	Crb2
X	137094450	137107350	12900	15713.8	586	0	13984	Esx1
15	99049100	99066000	16900	15709.8	587	0	19132	Prph
11	61008300	61029800	21500	15667.4	588	0	16515	Kcnj12
18	67128550	67139350	10800	15653.6	589	0	14680	Gnal
1	91338300	91348300	10000	15651.5	590	0	227357	Espnl
6	114030500	114047600	17100	15641.9	591	0	11941	Atp2b2
12	113131100	113158800	27700	15639.2	592	0	68337	Crip2
7	25670050	25691500	21450	15622.6	593	0	320208	Tmem91
2	36194950	36219550	24600	15610.8	594	0	67871	Mrrf
2	29741200	29755400	14200	15599.1	595	0	433415	Gm13420
19	54040450	54056850	16400	15572.1	596	0	11551	Adra2a
15	80280150	80293400	13250	15569.9	597	0	239556	Cacna1i
5	118021750	118034600	12850	15550.2	598	0	57816	Tesc
8	22971000	22984450	13450	15508	599	0	11733	Ank1
15	75881650	75898100	16450	15494.5	600	0	66656	Eef1d
18	74438200	74448600	10400	15356.9	601	0	17919	Myo5b
5	140603800	140618700	14900	15355.8	602	0	16848	Lfng
1	132875700	132893850	18150	15337.8	603	0	16980	Lrrn2
4	148267850	148291450	23600	15309.6	604	0	242748	Disp3
14	70614500	70630700	16200	15299.7	605	0	13829	Dmtn
7	16467150	16478900	11750	15278.8	606	0	18142	Npas1
12	86207200	86223500	16300	15264.9	607	0	328136	Gm805
2	119233000	119243700	10700	15234.3	608	0	20732	Spint1
11	19005350	19023550	18200	15190.4	609	0	17268	Meis1
4	133490350	133507750	17400	15187.8	610	0	69539	Trnp1
14	57101650	57108950	7300	15180.5	611	0	14619	Gjb2
15	80004900	80023600	18700	15165.9	612	0	18591	Pdgfb
5	67597850	67612000	14150	15158.6	613	0	330096	Shisa3
17	29880750	29894100	13350	15135.4	614	0	74762	Mdga1
9	48829700	48839850	10150	15118.1	615	0	235320	Zbtb16
6	52003400	52014900	11500	15112.7	616	0	54353	Skap2
13	116702600	116713350	10750	15111.9	617	0	74680	4930435F18Rik
11	120527400	120537300	9900	15099.5	618	0	14527	Gcgr
12	31553900	31564950	11050	15091.4	619	0	23985	Slc26a4
3	107098350	107104850	6500	15075.7	620	0	16490	Kcna2
12	55592900	55602350	9450	15055.5	621	0	56856	Insm2
14	51737100	51744450	7350	15049.3	622	0	219033	Ang4
6	91835700	91850100	14400	15041.5	623	0	243547	Grip2
8	104536150	104546650	10500	15035	624	0	12354	Car7
11	63913100	63930450	17350	15026	625	0	54710	Hs3st3b1
13	3356400	3364250	7850	15024.2	626	0	76937	2810429I04Rik
5	128428700	128444650	15950	15018.6	627	0	243274	Tmem132d
14	61680650	61692400	11750	15011.6	628	0	668253	Dleu2
11	9111550	9122750	11200	15000.1	629	0	22271	Upp1
7	49674150	49692000	17850	14963.3	630	0	13172	Dbx1
1	75420000	75430000	10000	14942.5	631	0	11790	Speg
7	24631300	24645500	14200	14920.1	632	0	72434	Lypd3
14	29705300	29730000	24700	14915.7	633	0	12294	Cacna2d3
10	112265050	112274750	9700	14898.6	634	0	268345	Kcnc2
7	49966200	49984550	18350	14871.1	635	0	338352	Nell1
15	37227400	37239150	11750	14869.9	636	0	252973	Grhl2
11	52761750	52770600	8850	14866.1	637	0	320027	Fstl4
X	71657400	71670800	13400	14863.1	638	0	14765	Gpr50
5	101518650	101546400	27750	14859.7	639	0	18096	Nkx6-1
14	39467750	39478950	11200	14839.1	640	0	18183	Nrg3
5	37157500	37176700	19200	14805.3	641	0	381634	Gm1043
8	27222200	27231300	9100	14805	642	0	76615	Got1l1
17	86750000	86757200	7200	14803.3	643	0	13819	Epas1
10	43997450	44009450	12000	14781	644	0	11630	Crybg1
3	104775550	104786650	11100	14771.6	645	0	71887	Ppm1j
13	30746550	30753700	7150	14751.5	646	0	16364	Irf4
11	82422900	82441700	18800	14741.7	647	0	270893	Tmem132e
6	126637600	126648600	11000	14738.8	648	0	16485	Kcna1
12	84872350	84883950	11600	14704.9	649	0	16997	Ltbp2
10	7388650	7395250	6600	14700.5	650	0	77777	Ulbp1
17	35239150	35270350	31200	14670.2	651	0	53817	Ddx39b
16	17824700	17839300	14600	14643.4	652	0	80733	Car15
17	26108750	26124500	15750	14641.7	653	0	68611	Mrpl28
2	115849300	115862950	13650	14634.1	654	0	17536	Meis2
18	80357450	80366300	8850	14575	655	0	240444	Kcng2
15	79247550	79268350	20800	14559.9	656	0	57274	Slc16a8
6	124992300	125005800	13500	14559.4	657	0	319352	Pianp
18	34538000	34555100	17100	14552.2	658	0	20890	Wnt8a
5	73003100	73018300	15200	14546.9	659	0	231290	Slc10a4
6	49818200	49828050	9850	14541.9	660	0	109648	Npy
7	128413150	128423100	9950	14541.5	661	0	67865	Rgs10
6	113885450	113900200	14750	14527	662	0	11941	Atp2b2
5	63645350	63654900	9550	14510.5	663	0	319807	Nwd2
17	56744150	56766050	21900	14492	664	0	224907	Dus3l
11	97621700	97632800	11100	14475.1	665	0	69729	2410003L11Rik
1	180932650	180948850	16200	14417.1	666	0	208795	Tmem63a
13	56285550	56300200	14650	14398.5	667	0	57266	Cxcl14
13	23305700	23315250	9550	14397.9	668	0	75887	4930586N03Rik
1	154716700	154733900	17200	14396.6	669	0	12290	Cacna1e
17	79708750	79719700	10950	14357.6	670	0	13078	Cyp1b1
19	41730850	41748150	17300	14352.9	671	0	20562	Slit1
12	86976750	86996700	19950	14338.2	672	0	238331	Zdhhc22
7	121389250	121400900	11650	14327	673	0	195646	Hs3st2
6	39866950	39875700	8750	14317.1	674	0	434008	Tmem178b
9	31124900	31138950	14050	14303.6	675	0	19143	St14
7	18953600	18968000	14400	14288.1	676	0	384569	Nova2
11	119386450	119397550	11100	14273.4	677	0	672511	Rnf213
15	89542350	89562100	19750	14242.1	678	0	58234	Shank3
11	72131550	72140200	8650	14240.9	679	0	327958	Pitpnm3
4	137270650	137287050	16400	14233	680	0	22417	Wnt4
13	98569200	98592400	23200	14230.9	681	0	68344	Tmem174
7	30624250	30642550	18300	14222.2	682	0	71909	Haus5
5	130443550	130454850	11300	14176.6	683	0	140904	Caln1
2	18602850	18616350	13500	14156.9	684	0	12238	Commd3
2	25172450	25187950	15500	14133.2	685	0	67122	Nrarp
11	102098800	102112600	13800	14126.5	686	0	217212	Pyy
7	138935350	138946900	11550	14100.8	687	0	74004	Jakmip3
8	106129750	106141600	11850	14096.6	688	0	77411	Esrp2
2	165068350	165083450	15100	14087.8	689	0	72211	1700025C18Rik
11	84954850	84962550	7700	14083.3	690	0	12351	Car4
1	40675450	40686350	10900	14061.5	691	0	226999	Slc9a2
8	70887650	70899950	12300	14032.8	692	0	76808	Rpl18a
4	154405900	154456950	51050	14031.6	693	0	70673	Prdm16
17	12504900	12510200	5300	14028.7	694	0	20519	Slc22a3
18	25671400	25689700	18300	14012	695	0	108013	Celf4
6	31214100	31224800	10700	14009.9	696	0	73652	2210408F21Rik
7	45851300	45875250	23950	14003.4	697	0	68137	Kdelr1
15	102680450	102706700	26250	13996.9	698	0	67488	Calcoco1
2	31308350	31321300	12950	13996.9	699	0	665700	Hmcn2
5	114266550	114280400	13850	13970.4	700	0	116810	Foxn4
10	61414550	61424350	9800	13943.4	701	0	18119	Nodal
5	137023750	137034900	11150	13939.2	702	0	381677	Vgf
13	56748300	56757450	9150	13924	703	0	17129	Smad5
19	25500000	25515700	15700	13923.2	704	0	50796	Dmrt1
2	156607850	156623400	15550	13921.3	705	0	228836	Dlgap4
2	91917500	91938750	21250	13911.4	706	0	228361	Ambra1
7	25001700	25017850	16150	13909	707	0	232975	Atp1a3
11	95912750	95921700	8950	13905	708	0	14422	B4galnt2
6	118190350	118201950	11600	13903.3	709	0	19713	Ret
17	36935950	36954050	18100	13877.4	710	0	76497	Ppp1r11
5	37239300	37250150	10850	13836.5	711	0	12933	Crmp1
9	95552450	95566650	14200	13820	712	0	75552	Paqr9
11	7053300	7075700	22400	13812.7	713	0	432530	Adcy1
3	90457800	90470550	12750	13776.2	714	0	18160	Npr1
7	144893600	144903150	9550	13773.4	715	0	14170	Fgf15
9	32339250	32350350	11100	13768.1	716	0	16521	Kcnj5
11	101957350	101969400	12050	13763	717	0	74499	Sost
4	155355650	155368500	12850	13754.6	718	0	18762	Prkcz
13	56218250	56237300	19050	13745	719	0	75245	4930550C17Rik
9	58813200	58831100	17900	13718.3	720	0	330953	Hcn4
10	127319650	127332750	13100	13716.5	721	0	216445	Arhgap9
2	93951450	93965700	14250	13710.9	722	0	69113	Alkbh3
18	21649000	21659050	10050	13710.3	723	0	74644	4930426D05Rik
6	38631800	38645200	13400	13704.4	724	0	74253	Klrg2
5	138818150	138826550	8400	13697.4	725	0	384244	Foxl3
1	64729100	64740500	11400	13662	726	0	14367	Fzd5
7	99616700	99635350	18650	13661.8	727	0	100503386	Tpbgl
19	42427500	42443650	16150	13658.4	728	0	72832	Crtac1
4	143342500	143353750	11250	13633.1	729	0	242735	Lrrc38
17	33972050	33983350	11300	13613.2	730	0	630499	H2-K2
17	35316200	35326300	10100	13589.7	731	0	15006	H2-Q1
10	77672950	77693100	20150	13573.7	732	0	252974	Tspear
1	156299900	156314150	14250	13555.4	733	0	214575	Tdrd5
2	31873650	31893350	19700	13546.3	734	0	23928	Lamc3
8	17529550	17540900	11350	13527.7	735	0	94109	Csmd1
6	29165750	29183650	17900	13520.4	736	0	101359	Prrt4
5	73644700	73656750	12050	13471.1	737	0	73472	Spata18
2	18795000	18805000	10000	13461	738	0	66774	Carlr
12	102125950	102135500	9550	13436.8	739	0	238384	Slc24a4
13	74116550	74129150	12600	13399.5	740	0	105243	Slc9a3
11	77460400	77470450	10050	13365.6	741	0	216961	Coro6
7	141085550	141106100	20550	13344.6	742	0	71345	Ano9
4	130128900	130144850	15950	13333.2	743	0	230777	Hcrtr1
11	101258050	101271700	13650	13311.3	744	0	69847	Wnk4
X	7915850	7932600	16750	13303.8	745	0	668963	Btbd35f20
6	121406450	121417150	10700	13286.2	746	0	243621	Iqsec3
11	74584250	74595000	10750	13275.2	747	0	380711	Rap1gap2
2	158660750	158674700	13950	13274.5	748	0	228852	Ppp1r16b
2	180493850	180506000	12150	13266.9	749	0	18216	Ntsr1
12	112674350	112689050	14700	13252.5	750	0	382639	Zbtb42
X	141718700	141727800	9100	13251.5	751	0	16370	Irs4
5	22339700	22351300	11600	13250.9	752	0	19699	Reln
9	107226200	107239950	13750	13246.9	753	0	208869	Dock3
1	14751000	14759150	8150	13246	754	0	17681	Msc
5	115181350	115198750	17400	13220.4	755	0	29867	Cabp1
1	75380850	75394400	13550	13215.4	756	0	11790	Speg
6	125374300	125387100	12800	13200.2	757	0	213522	Plekhg6
1	86040150	86050400	10250	13179.3	758	0	72792	2810459M11Rik
2	149824950	149836000	11050	13157.1	759	0	433485	Syndig1
4	140098650	140119350	20700	13156.4	760	0	230868	Igsf21
19	5738650	5765800	27150	13139.3	761	0	78891	Scyl1
17	74042550	74052850	10300	13125.8	762	0	94224	Srd5a2
8	47407400	47419150	11750	13105.1	763	0	71069	Stox2
11	100954950	100974150	19200	13090.3	764	0	19285	Cavin1
13	100547200	100557800	10600	13088.1	765	0	18260	Ocln
8	106598100	106608000	9900	13058.4	766	0	12550	Cdh1
7	98190750	98197750	7000	13055.9	767	0	272411	B3gnt6
7	47127100	47137800	10700	13026.4	768	0	19259	Ptpn5
9	64381450	64390200	8750	13019.5	769	0	214058	Megf11
15	85655700	85681350	25650	13017.9	770	0	102800312	Lncppara
18	86708950	86717300	8350	13010.5	771	0	12405	Cbln2
7	66421050	66432950	11900	13006.6	772	0	56847	Aldh1a3
12	100893050	100911500	18450	13003.5	773	0	238377	Gpr68
11	75188300	75202800	14500	12995.9	774	0	237847	Rtn4rl1
19	56715900	56729350	13450	12985.8	775	0	11554	Adrb1
2	25860650	25884150	23500	12985.4	776	0	227632	Kcnt1
2	127534150	127548100	13950	12963	777	0	192212	Prom2
4	138449500	138477150	27650	12956	778	0	66259	Camk2n1
12	33952800	33975750	22950	12951.3	779	0	22160	Twist1
7	35115050	35125050	10000	12942.5	780	0	12606	Cebpa
11	72956050	72972050	16000	12924.7	781	0	53313	Atp2a3
13	96125050	96137500	12450	12891.4	782	0	75209	Sv2c
17	24748450	24762750	14300	12888.6	783	0	328779	Hs3st6
18	78042000	78052350	10350	12881.4	784	0	620235	Siglec15
18	24649300	24658600	9300	12858.9	785	0	68591	Mocos
X	37041600	37054600	13000	12780	786	0	245381	Sowahd
11	101075400	101085350	9950	12766.4	787	0	71743	Coasy
4	123100100	123109800	9700	12741.4	788	0	12164	Bmp8b
17	56452050	56478900	26850	12733	789	0	19280	Ptprs
11	11110850	11118500	7650	12703.1	790	0	319922	Vwc2
5	120245200	120273650	28450	12690.8	791	0	74111	Rbm19
13	92418850	92432200	13350	12688.6	792	0	218440	Ankrd34b
7	126073700	126088200	14500	12685.3	793	0	269994	Gsg1l
5	75143600	75157400	13800	12664.6	794	0	18595	Pdgfra
12	53243650	53252500	8850	12663.1	795	0	27386	Npas3
7	143970400	143986900	16500	12659.3	796	0	210274	Shank2
2	93173500	93214600	41100	12617.3	797	0	277414	Trp53i11
17	25947550	25965600	18050	12601.6	798	0	50817	Capn15
18	31926850	31949850	23000	12599.7	799	0	574402	Gpr17
19	53668750	53678850	10100	12591.4	800	0	73713	Rbm20
5	30704100	30719100	15000	12576.4	801	0	65254	Dpysl5
2	127651200	127661200	10000	12517.3	802	0	17153	Mal
17	48091750	48101850	10100	12499.6	803	0	68224	1700067P10Rik
11	3755150	3782900	27750	12474.4	804	0	74309	Osbp2
19	58448600	58458800	10200	12474.2	805	0	14585	Gfra1
9	57936700	57956850	20150	12473.2	806	0	20361	Sema7a
2	29841900	29852700	10800	12472.9	807	0	723904	Mir219a-2
14	68073200	68087650	14450	12472.1	808	0	18040	Nefm
1	154200000	154207150	7150	12446.8	809	0	100503355	Zfp648
1	131237500	131254500	17000	12425.9	810	0	56489	Ikbke
9	21159550	21169800	10250	12414.1	811	0	18577	Pde4a
13	38144900	38156150	11250	12394.3	812	0	109620	Dsp
3	84475000	84484700	9700	12381.8	813	0	229474	Fhdc1
4	47200750	47210450	9700	12361.2	814	0	12819	Col15a1
4	103610900	103624100	13200	12346.4	815	0	13131	Dab1
10	103026300	103037900	11600	12344.4	816	0	216285	Alx1
5	128592450	128610500	18050	12335.1	817	0	93897	Fzd10
9	99351050	99364600	13550	12331.5	818	0	272636	Esyt3
18	75814000	75830900	16900	12328	819	0	207259	Zbtb7c
14	70172800	70187300	14500	12307	820	0	213019	Pdlim2
5	136564700	136585500	20800	12247.5	821	0	13047	Cux1
7	34671500	34689300	17800	12233.5	822	0	68947	Chst8
14	66274300	66283150	8850	12229	823	0	19229	Ptk2b
8	122332600	122346800	14200	12207.8	824	0	22761	Zfpm1
19	48201600	48211750	10150	12204.5	825	0	66673	Sorcs3
4	129970100	129996900	26800	12199.4	826	0	230775	Adgrb2
2	31840650	31851800	11150	12198.1	827	0	98970	Fibcd1
2	168266200	168284650	18450	12187.5	828	0	241794	Kcng1
15	84437150	84458000	20850	12157.6	829	0	72301	Shisal1
13	69729400	69743650	14250	12150.2	830	0	76980	Ube2ql1
17	43624050	43633450	9400	12126.4	831	0	210510	Tdrd6
8	32880300	32889150	8850	12091.7	832	0	211323	Nrg1
9	112230500	112239700	9200	12091.7	833	0	74100	Arpp21
2	75131450	75149450	18000	12086.9	834	0	53375	Mtx2
7	34807500	34818000	10500	12060.7	835	0	68947	Chst8
17	35465300	35477050	11750	12024	836	0	15007	H2-Q10
8	25035000	25045750	10750	12022.2	837	0	83436	Plekha2
4	91368100	91377500	9400	12016.5	838	0	15569	Elavl2
1	171184650	171200300	15650	12012.5	839	0	66425	Pcp4l1
5	33494300	33521100	26800	11999.5	840	0	672284	Nkx1-1
7	5048600	5062600	14000	11991.7	841	0	68992	Zfp580
11	50595350	50610900	15550	11928.3	842	0	216725	Adamts2
8	94689150	94698500	9350	11906.9	843	0	67801	Pllp
2	32077800	32093400	15600	11895.3	844	0	241303	Fam78a
16	97605800	97615100	9300	11892.8	845	0	50528	Tmprss2
1	134704000	134716350	12350	11887	846	0	20980	Syt2
13	56435000	56441950	6950	11885.8	847	0	328258	Slc25a48
15	73832850	73847050	14200	11876.5	848	0	268816	Mroh5
9	103108250	103117600	9350	11868.9	849	0	270192	Rab6b
9	120298650	120309400	10750	11864.9	850	0	245049	Myrip
19	30545000	30555450	10450	11859.1	851	0	13380	Dkk1
2	91967050	91979800	12750	11847.6	852	0	104418	Dgkz
9	52674600	52683700	9100	11832.6	853	0	382139	Gm1715
18	46195550	46214850	19300	11826.5	854	0	28105	Trim36
13	73532750	73539750	7000	11826.5	855	0	13162	Slc6a3
7	99264150	99273500	9350	11812.8	856	0	381967	Gm26705
12	111665100	111676750	11650	11787.5	857	0	12709	Ckb
11	69959200	69971050	11850	11770	858	0	54351	Elp5
7	79788300	79798400	10100	11765.8	859	0	17292	Mesp1
11	11678600	11691400	12800	11751.7	860	0	22778	Ikzf1
1	135815400	135824600	9200	11719.8	861	0	16763	Lad1
15	11901200	11909300	8100	11694.3	862	0	381002	Gm5144
7	141287800	141299700	11900	11691.4	863	0	54006	Deaf1
3	93438800	93452600	13800	11683.6	864	0	99681	Tchh
1	180694100	180700850	6750	11655.5	865	0	27217	Mixl1
8	12312450	12341900	29450	11652.6	866	0	434280	Sox1ot
11	115149200	115170050	20850	11648.1	867	0	58222	Rab37
17	23533500	23547400	13900	11640.7	868	0	320020	6330415G19Rik
11	93096150	93104000	7850	11636.6	869	0	72605	Car10
19	10451350	10465850	14500	11635.8	870	0	54525	Syt7
1	5914900	5920450	5550	11629.8	871	0	226304	Npbwr1
10	114798250	114806450	8200	11624.8	872	0	237553	Trhde
8	35820100	35832500	12400	11622.9	873	0	71908	Cldn23
11	104228750	104237900	9150	11598.7	874	0	17762	Mapt
14	33916800	33931250	14450	11589.5	875	0	14560	Gdf10
7	79047250	79057650	10400	11585.3	876	0	11595	Acan
17	69072050	69080400	8350	11572.5	877	0	13823	Epb41l3
5	75974300	75983250	8950	11569.1	878	0	16542	Kdr
1	184877050	184886750	9700	11566.1	879	0	226777	C130074G19Rik
10	90819650	90836250	16600	11562.5	880	0	77531	Anks1b
7	81987250	81997400	10150	11549.7	881	0	12173	Bnc1
14	55102150	55119900	17750	11546.5	882	0	319984	Jph4
8	123113650	123121100	7450	11541.3	883	0	108148	Galnt2
3	105445500	105460750	15250	11534.8	884	0	78635	Kcnd3os
10	79607100	79617650	10550	11531.8	885	0	237397	C2cd4c
19	6525650	6544550	18900	11527	886	0	20521	Slc22a12
14	84440800	84450150	9350	11500.4	887	0	219228	Pcdh17
12	30879250	30892300	13050	11497.9	888	0	100294583	Alkal2
4	130303150	130316050	12900	11485.2	889	0	619605	Zcchc17
5	35051200	35085650	34450	11481.5	890	0	231134	Dok7
12	14146750	14154250	7500	11468	891	0	105005	Lratd1
7	57503800	57514900	11100	11436.9	892	0	14402	Gabrb3
9	78439250	78449900	10650	11421.8	893	0	68291	Mto1
11	81151100	81157450	6350	11412.1	894	0	11418	Asic2
7	45359350	45374500	15150	11406.9	895	0	76787	Ppfia3
8	108688350	108700900	12550	11406.5	896	0	11906	Zfhx3
2	132942400	132950950	8550	11406.5	897	0	241639	Fermt1
2	153100000	153115350	15350	11393.9	898	0	15162	Hck
4	148396700	148406650	9950	11385.8	899	0	71707	Ubiad1
2	181027850	181053000	25150	11383.2	900	0	11438	Chrna4
12	76703550	76714450	10900	11381.3	901	0	20741	Sptb
15	75558600	75569050	10450	11381.1	902	0	23934	Ly6h
6	32581950	32596000	14050	11379.9	903	0	243743	Plxna4
15	79798650	79809800	11150	11378.1	904	0	73340	Nptxr
1	78133050	78154500	21450	11368	905	0	18505	Pax3
2	162654150	162667750	13600	11357	906	0	77288	9430021M05Rik
3	89828000	89836600	8600	11347.4	907	0	214547	She
11	52164750	52175550	10800	11345.3	908	0	257871	Or2y7
1	170894150	170911650	17500	11335.6	909	0	435653	Fcrlb
2	29024800	29050300	25500	11334.4	910	0	329375	Cfap77
11	83415450	83436300	20850	11326.7	911	0	276952	Rasl10b
17	51826000	51839050	13050	11319.5	912	0	20230	Satb1
14	119133900	119144850	10950	11318.5	913	0	50787	Hs6st3
9	111308400	111316850	8450	11314.5	914	0	320429	Trank1
1	134229200	134238350	9150	11297.2	915	0	11539	Adora1
2	164990550	165005450	14900	11292.6	916	0	57138	Slc12a5
1	181350400	181356250	5850	11273.1	917	0	72978	Cnih3
7	19300200	19312800	12600	11269	918	0	14282	Fosb
2	109669800	109679750	9950	11267.1	919	0	12064	Bdnf
6	115988100	115999800	11700	11254.6	920	0	67784	Plxnd1
9	32537000	32551750	14750	11254.4	921	0	14247	Fli1
4	134339850	134346850	7000	11251.8	922	0	230810	Slc30a2
1	136254600	136265100	10500	11215.9	923	0	383563	Gpr25
15	78665950	78697300	31350	11188.9	924	0	207393	Elfn2
6	118004150	118020300	16150	11188.7	925	0	70727	Rasgef1a
1	132288200	132310100	21900	11184	926	0	213417	Klhdc8a
8	92954950	92965400	10450	11183.6	927	0	20538	Slc6a2
2	90882000	90891500	9500	11173.6	928	0	67445	C1qtnf4
15	76290100	76302250	12150	11167.6	929	0	75475	Oplah
16	35147600	35162400	14800	11163.2	930	0	224129	Adcy5
9	71212250	71221250	9000	11158.4	931	0	19378	Aldh1a2
4	106620850	106629650	8800	11153.7	932	0	230576	Ttc22
2	163201950	163208800	6850	11151	933	0	269389	Tox2
8	9768450	9778050	9600	11150.7	934	0	270028	Nalf1
8	84547300	84568050	20750	11144.8	935	0	12286	Cacna1a
13	55412750	55424150	11400	11136.9	936	0	75477	Pfn3
4	134364250	134374950	10700	11108	937	0	56219	Extl1
9	55020200	55028850	8650	11085.1	938	0	110834	Chrna3
16	31930250	31939450	9200	11082.4	939	0	239827	Pigz
11	116527300	116538750	11450	11081.1	940	0	217342	Ube2o
8	99411350	99423250	11900	11068.5	941	0	234624	A330008L17Rik
5	34284050	34293050	9000	11064.3	942	0	231125	Zfyve28
11	71747400	71762350	14950	11040.6	943	0	216881	Wscd1
4	131911600	131924700	13100	11011.4	944	0	623230	Tmem200b
10	75312800	75330200	17400	11011	945	0	11540	Adora2a
19	44878300	44900850	22550	11006.6	946	0	102465114	Mir3084-2
12	106473450	106485550	12100	11001.9	947	0	76639	1700121N20Rik
16	22653600	22661900	8300	10996.8	948	0	110197	Dgkg
4	36948650	36955150	6500	10978.1	949	0	242384	Lingo2
8	111886100	111893750	7650	10974.6	950	0	56773	Chst5
4	155649600	155662500	12900	10970.6	951	0	76580	Mib2
9	14855250	14866250	11000	10969.9	952	0	14608	Gpr83
13	84343050	84352800	9750	10963.3	953	0	72745	Tmem161b
13	72812450	72823000	10550	10962.4	954	0	78446	D730050B12Rik
18	76052850	76065300	12450	10961	955	0	207259	Zbtb7c
5	52107550	52119800	12250	10913.4	956	0	102466648	Mir6417
11	18867550	18878100	10550	10896.8	957	0	17268	Meis1
8	72315400	72325100	9700	10896.8	958	0	16598	Klf2
5	147217550	147231750	14200	10883.2	959	0	70147	Plut
4	139750200	139772750	22550	10882.9	960	0	18509	Pax7
12	78903600	78915200	11600	10871.8	961	0	27260	Plek2
16	8420300	8428200	7900	10871.5	962	0	74720	Tmem114
3	104957550	104968350	10800	10861.7	963	0	22414	Wnt2b
13	23390800	23402600	11800	10831.5	964	0	75887	4930586N03Rik
3	157564750	157572950	8200	10821.7	965	0	19218	Ptger3
10	4707950	4718200	10250	10820.9	966	0	13982	Esr1
8	84407600	84423000	15400	10797.5	967	0	12286	Cacna1a
4	46531650	46541250	9600	10795.8	968	0	74735	Trim14
5	137281800	137296800	15000	10781.9	969	0	83701	Srrt
17	26194700	26211500	16800	10779.5	970	0	69191	Pdia2
16	30305100	30312000	6900	10776.5	971	0	14729	Gp5
14	122396900	122413150	16250	10762.8	972	0	69634	Clybl
18	34859100	34868150	9050	10740.1	973	0	13653	Egr1
7	37767250	37779550	12300	10726.2	974	0	243937	Zfp536
15	87538900	87550400	11500	10724.1	975	0	106014	Tafa5
11	16256500	16262500	6000	10717.3	976	0	211739	Vstm2a
2	126548350	126557300	8950	10650.2	977	0	26458	Slc27a2
18	77790750	77800050	9300	10647.3	978	0	619308	F830208F22Rik
17	83625800	83634050	8250	10647.2	979	0	225030	Kcng3
18	76530350	76551500	21150	10621	980	0	17126	Smad2
16	97755850	97769050	13200	10616.4	981	0	72388	Ripk4
19	45534600	45559300	24700	10616.1	982	0	56626	Poll
11	69792150	69808350	16200	10611.7	983	0	380705	Tmem102
2	172038900	172047550	8650	10607.5	984	0	228942	Cbln4
2	113755300	113763050	7750	10604.9	985	0	23892	Grem1
1	87123500	87130400	6900	10600.4	986	0	11648	Akp3
10	128930550	128944800	14250	10586.3	987	0	16404	Itga7
8	76894350	76906000	11650	10583.2	988	0	110784	Nr3c2
14	121499650	121510150	10500	10583.1	989	0	56643	Slc15a1
15	100723300	100735200	11900	10581	990	0	619313	I730030J21Rik
7	105420950	105434900	13950	10577.9	991	0	12426	Cckbr
19	58910900	58936850	25950	10573.9	992	0	73442	Hspa12a
13	51560500	51573150	12650	10566.2	993	0	20418	Shc3
4	133597700	133606700	9000	10557.9	994	0	55948	Sfn
13	48728550	48747650	19100	10550	995	0	18676	Phf2
9	22045500	22062100	16600	10549.1	996	0	319601	Zfp653
2	163331350	163343350	12000	10524.7	997	0	59091	Jph2
17	85795450	85808900	13450	10519.9	998	0	20472	Six2
16	93677400	93686450	9050	10507.7	999	0	109857	Cbr3
1	50922200	50931450	9250	10486.9	1000	0	56363	Tmeff2
18	23034050	23042350	8300	10478.6	1001	0	319211	Nol4
15	101844850	101864800	19950	10469.2	1002	0	406220	Krt77
1	93093650	93107100	13450	10468.4	1003	0	16560	Kif1a
2	13007850	13014550	6700	10454.4	1004	0	227580	C1ql3
9	114554350	114567400	13050	10437.9	1005	0	636931	Trim71
5	35752350	35765750	13400	10421.1	1006	0	231148	Ablim2
4	46034750	46046400	11650	10420.9	1007	0	21916	Tmod1
7	29165950	29178000	12050	10414.1	1008	0	57296	Psmd8
12	109449300	109464350	15050	10405.1	1009	0	13386	Dlk1
9	43199250	43209400	10150	10391.2	1010	0	18988	Pou2f3
9	123672250	123684650	12400	10388.7	1011	0	12769	Ccr9
7	112952950	112959750	6800	10344	1012	0	78748	Rassf10
12	76402050	76408300	6250	10338.9	1013	0	15512	Hspa2
11	69232800	69240200	7400	10338.9	1014	0	14919	Gucy2e
2	25225900	25250550	24650	10330.6	1015	0	78797	Ndor1
7	24607750	24615550	7800	10321	1016	0	66071	Ethe1
11	22852100	22865450	13350	10320.1	1017	0	53625	B3gnt2
7	139892000	139903150	11150	10320.1	1018	0	76484	Kndc1
4	124566350	124581950	15600	10310.4	1019	0	108809	4933407E24Rik
16	35655700	35667650	11950	10308.6	1020	0	20357	Sema5b
17	35417800	35427400	9600	10281.2	1021	0	15019	H2-Q8
15	76184850	76212600	27750	10275.2	1022	0	18810	Plec
15	100630550	100642900	12350	10274.1	1023	0	668218	Bin2
9	30939950	30948950	9000	10270.8	1024	0	30806	Adamts8
17	35192950	35207000	14050	10241.4	1025	0	21926	Tnf
18	25748450	25767050	18600	10228.2	1026	0	108013	Celf4
2	157903650	157918400	14750	10226.2	1027	0	277432	Vstm2l
11	98047150	98062000	14850	10223.8	1028	0	217154	Stac2
11	98541000	98552250	11250	10216.4	1029	0	69376	Zpbp2
13	69477600	69493550	15950	10212.6	1030	0	210106	Tent4a
1	23756900	23765750	8850	10209.5	1031	0	280645	B3gat2
3	68864800	68873250	8450	10208.3	1032	0	68725	1110032F04Rik
12	51590050	51597300	7250	10198.7	1033	0	12810	Coch
10	79708050	79724550	16500	10188.5	1034	0	15166	Hcn2
1	75213700	75225050	11350	10186.5	1035	0	381272	A630095N17Rik
4	135562700	135585900	23200	10166.8	1036	0	230824	Grhl3
15	98672250	98683700	11450	10163.7	1037	0	223881	Rnd1
2	33698900	33724300	25400	10160.6	1038	0	72543	Mvb12b
4	46595250	46617450	22200	10160.1	1039	0	381605	Tbc1d2
1	18053050	18062450	9400	10152.5	1040	0	78081	Crisp4
2	127478200	127488900	10700	10151.2	1041	0	56461	Kcnip3
14	23998550	24008750	10200	10141.7	1042	0	78019	4930519K11Rik
12	31071700	31078850	7150	10128.2	1043	0	104943	Fam110c
4	44421100	44431950	10850	10118.3	1044	0	17279	Melk
7	4769200	4785950	16750	10108.9	1045	0	78052	Tmem190
12	80753050	80764500	11450	10101.9	1046	0	380768	Ccdc177
5	147396450	147403950	7500	10099.5	1047	0	14255	Flt3
18	66456600	66464600	8000	10096.8	1048	0	58801	Pmaip1
12	73537650	73553450	15800	10096.6	1049	0	73644	2210039B01Rik
11	72261650	72272450	10800	10094.5	1050	0	73366	1700051A21Rik
7	45829950	45838550	8600	10077.1	1051	0	14814	Grin2d
13	38341450	38351150	9700	10068.5	1052	0	12161	Bmp6
17	24683850	24700500	16650	10052.1	1053	0	71893	Noxo1
2	153022550	153039050	16500	10050.6	1054	0	228787	Xkr7
9	26728700	26742000	13300	10040.1	1055	0	76898	B3gat1
11	80150650	80157850	7200	10029.2	1056	0	216991	Adap2
7	119179400	119190150	10750	10022.6	1057	0	209776	Gpr139
15	55305750	55316050	10300	10016.5	1058	0	12818	Col14a1
X	57913650	57925050	11400	10002.4	1059	0	22773	Zic3
11	31368050	31375200	7150	10000.9	1060	0	20856	Stc2
1	124041650	124051550	9900	9998.83	1061	0	269109	Dpp10
1	34673550	34682200	8650	9997.15	1062	0	226970	Arhgef4
12	81622700	81635200	12500	9991.86	1063	0	69480	Ttc9
7	13040300	13050250	9950	9977.54	1064	0	109889	Mzf1
10	80927700	80943150	15450	9970.83	1065	0	17873	Gadd45b
15	74657800	74678050	20250	9970.23	1066	0	11838	Arc
12	108694050	108705400	11350	9967.97	1067	0	70059	Degs2
2	180448800	180462350	13550	9958.21	1068	0	108115	Slco4a1
6	18028850	18036350	7500	9956.63	1069	0	22413	Wnt2
3	89314200	89324700	10500	9948.82	1070	0	13638	Efna3
15	76085650	76094950	9300	9942.22	1071	0	223649	Nrbp2
9	20722650	20731300	8650	9936.52	1072	0	244723	Olfm2
14	56359100	56369500	10400	9930.63	1073	0	192113	Atp12a
17	25806400	25823150	16750	9927.65	1074	0	214931	Fbxl16
11	100350050	100361300	11250	9918.46	1075	0	15114	Hap1
12	67217900	67228750	10850	9913.83	1076	0	320772	Mdga2
3	29079000	29087950	8950	9908.51	1077	0	75740	Egfem1
12	17321100	17333800	12700	9901.77	1078	0	68775	Atp6v1c2
18	74058700	74068600	9900	9900.84	1079	0	225724	Mapk4
2	155768100	155780850	12750	9887.25	1080	0	17391	Mmp24
7	35182750	35191950	9200	9871	1081	0	53896	Slc7a10
2	168761050	168773450	12400	9867.28	1082	0	99377	Sall4
19	45294450	45314100	19650	9850.9	1083	0	102465114	Mir3084-2
9	87009150	87019500	10350	9839.05	1084	0	382089	Ripply2
7	25358250	25375350	17100	9833.11	1085	0	72383	Cnfn
1	34744200	34756350	12150	9821.11	1086	0	226970	Arhgef4
3	27365850	27375850	10000	9797.35	1087	0	208188	Ghsr
13	34638050	34658350	20300	9789.5	1088	0	66895	Pxdc1
10	73094600	73102800	8200	9762.54	1089	0	11994	Pcdh15
4	125718100	125736700	18600	9757.92	1090	0	14807	Grik3
12	11142900	11154600	11700	9755.54	1091	0	238076	Kcns3
3	86545750	86553050	7300	9751.11	1092	0	80877	Lrba
6	85477250	85492550	15300	9734.14	1093	0	330369	Fbxo41
17	8337350	8345700	8350	9700.15	1094	0	320111	Prr18
6	36383800	36392600	8800	9697.17	1095	0	319472	9330158H04Rik
1	121170900	121186550	15650	9693.43	1096	0	98452	Celrr
6	85402850	85412400	9550	9692.9	1097	0	384452	Noto
5	98851150	98858650	7500	9687.14	1098	0	110075	Bmp3
15	85731300	85738150	6850	9686.91	1099	0	19013	Ppara
16	92691200	92701300	10100	9671.74	1100	0	12394	Runx1
13	105442500	105449100	6600	9663.74	1101	0	15550	Htr1a
1	87503950	87513850	9900	9660.58	1102	0	53972	Ngef
9	69665250	69677300	12050	9657.36	1103	0	64290	Foxb1
6	28129250	28139700	10450	9630.73	1104	0	14823	Grm8
13	76051700	76058650	6950	9589.1	1105	0	238725	Gpr150
5	112223850	112234100	10250	9584.23	1106	0	330166	Miat
17	34019350	34047450	28100	9580.59	1107	0	723823	Mir219a-1
11	5990400	6010950	20550	9569.41	1108	0	12323	Camk2b
2	124087250	124093750	6500	9555.91	1109	0	214968	Sema6d
5	110539550	110550450	10900	9548.83	1110	0	231605	Galnt9
12	80690200	80697200	7000	9524.19	1111	0	68354	Plekhd1os
2	181209150	181218600	9450	9522.21	1112	0	20811	Srms
17	68832150	68844400	12250	9517.32	1113	0	622645	Tmem200c
17	46294000	46307250	13250	9516.48	1114	0	224814	Abcc10
3	36518450	36525450	7000	9516.06	1115	0	100503068	Smim43
19	38095200	38102650	7450	9503.14	1116	0	107221	Ffar4
9	46440050	46447850	7800	9473.66	1117	0	74361	4931429L15Rik
19	23129500	23146800	17300	9471.96	1118	0	16601	Klf9
5	33680850	33708750	27900	9469.71	1119	0	21335	Tacc3
11	115364600	115378650	14050	9469.58	1120	0	217310	Hid1
6	3761250	3770550	9300	9467.76	1121	0	12311	Calcr
6	143427000	143454100	27100	9467.67	1122	0	75904	4930579D09Rik
9	110863400	110887950	24550	9463.69	1123	0	235633	Als2cl
7	78877000	78891750	14750	9463.23	1124	0	723884	Mir7-2
7	16942200	16953300	11100	9459.43	1125	0	434128	Pnma8b
7	4468000	4480250	12250	9450.65	1126	0	67425	Eps8l1
17	30896650	30909200	12550	9450.28	1127	0	224671	Btbd9
14	66907250	66915000	7750	9445.2	1128	0	239157	Pnma2
3	82898800	82907700	8900	9433.05	1129	0	79235	Lrat
11	52271600	52288000	16400	9423.05	1130	0	21414	Tcf7
10	80133200	80155900	22700	9421	1131	0	66043	Atp5f1d
6	125317100	125335050	17950	9406.32	1132	0	20276	Scnn1a
15	39193350	39200550	7200	9404.56	1133	0	116838	Rims2
7	82329400	82342800	13400	9398.55	1134	0	269959	Adamtsl3
19	47009700	47017050	7350	9384.22	1135	0	76952	Nt5c2
5	72576450	72591650	15200	9383.5	1136	0	545758	Slc10a4-ps
18	36192100	36202650	10550	9358.78	1137	0	100042150	Nrg2
7	35577400	35592750	15350	9343.69	1138	0	245886	Ankrd27
2	103964100	103977950	13850	9336.13	1139	0	70986	4931422A03Rik
6	115359350	115364050	4700	9332.79	1140	0	19016	Pparg
4	106460150	106466650	6500	9327.65	1141	0	100102	Pcsk9
10	61970350	61988050	17700	9321.84	1142	0	12817	Col13a1
13	54731650	54744950	13300	9318.33	1143	0	26913	Gprin1
10	122445650	122452600	6950	9306.15	1144	0	54140	Avpr1a
19	4982500	5004100	21600	9298.97	1145	0	225872	Npas4
9	27787750	27797300	9550	9291.07	1146	0	330908	Opcml
7	101007150	101015950	8800	9272.88	1147	0	18442	P2ry2
15	78192850	78209250	16400	9256.82	1148	0	19293	Pvalb
6	37296800	37302550	5750	9250.52	1149	0	320127	Dgki
6	7553500	7558950	5450	9248.08	1150	0	21333	Tac1
15	101995600	102010900	15300	9244.53	1151	0	16691	Krt8
15	5238650	5247750	9100	9242.16	1152	0	19219	Ptger4
3	96473300	96486800	13500	9231.09	1153	0	329716	BC107364
17	57056300	57074250	17950	9214.86	1154	0	70785	Dennd1c
9	89619550	89626050	6500	9198.29	1155	0	209743	Minar1
3	95166550	95175900	9350	9193.88	1156	0	20360	Sema6c
1	180479200	180490350	11150	9187.84	1157	0	381310	Stum
17	44731500	44742250	10750	9186.54	1158	0	12393	Runx2
6	114124050	114134750	10700	9186.08	1159	0	243616	Slc6a11
4	127165050	127174950	9900	9150.98	1160	0	242667	Dlgap3
1	39185800	39200000	14200	9150.24	1161	0	18143	Npas2
2	33538550	33548850	10300	9149.88	1162	0	16917	Lmx1b
5	146581050	146593350	12300	9149.05	1163	0	14738	Gpr12
13	94593000	94601050	8050	9134.07	1164	0	11774	Ap3b1
1	89988900	90004200	15300	9121.91	1165	0	208372	Asb18
7	18917600	18932650	15050	9119.98	1166	0	384569	Nova2
3	55777200	55784600	7400	9115.23	1167	0	26422	Nbea
7	109163050	109179300	16250	9102.86	1168	0	109594	Lmo1
10	60104150	60111950	7800	9093.13	1169	0	94214	Spock2
14	55759550	55773350	13800	9090.56	1170	0	57260	Ltb4r2
19	43382800	43391150	8350	9082.76	1171	0	545291	Hpse2
15	81686200	81698050	11850	9075.89	1172	0	214685	Chadl
7	126846050	126858050	12000	9050.11	1173	0	233875	Ino80e
1	9962100	9972150	10050	9045.52	1174	0	69312	Ppp1r42
X	101378950	101388950	10000	9042.97	1175	0	14618	Gjb1
7	81207000	81219050	12050	9041.27	1176	0	18584	Pde8a
8	126134250	126146500	12250	9037.8	1177	0	210027	Slc35f3
9	87138400	87147300	8900	9031.01	1178	0	244958	Mrap2
2	158548750	158562350	13600	9029.61	1179	0	545481	Arhgap40
7	100003050	100012900	9850	9028.18	1180	0	69121	Chrdl2
10	30839900	30847900	8000	9026.8	1181	0	15214	Hey2
13	10354600	10363450	8850	9007.02	1182	0	12671	Chrm3
15	78403250	78413900	10650	9004.25	1183	0	246221	Mpst
8	23151400	23161700	10300	8995.65	1184	0	74561	Nkx6-3
16	90826000	90834500	8500	8988.77	1185	0	70967	Eva1c
11	100744100	100765800	21700	8986.96	1186	0	380728	Kcnh4
7	19463900	19478650	14750	8976.25	1187	0	74463	Exoc3l2
7	19572500	19589800	17300	8961.51	1188	0	69731	Gemin7
10	60786500	60815050	28550	8956.11	1189	0	107449	Unc5b
4	104363950	104371800	7850	8933.87	1190	0	13131	Dab1
10	94939250	94949650	10400	8923.99	1191	0	54712	Plxnc1
1	163304650	163318900	14250	8918.92	1192	0	18933	Prrx1
7	143495850	143504550	8700	8918.31	1193	0	22113	Phlda2
10	44454450	44472350	17900	8918.01	1194	0	12142	Prdm1
4	124465300	124492900	27600	8908.38	1195	0	78460	1700057H15Rik
7	28539600	28550500	10900	8899.55	1196	0	68416	Sycn
6	28974100	28989700	15600	8861.94	1197	0	387237	Mir129-1
17	25243800	25259700	15900	8859.36	1198	0	545192	Baiap3
12	80513450	80522700	9250	8851.05	1199	0	69522	2310002D06Rik
18	77182350	77189750	7400	8843.23	1200	0	225742	St8sia5
17	87741900	87749550	7650	8831.4	1201	0	210741	Kcnk12
16	97166850	97176200	9350	8821.36	1202	0	13508	Dscam
6	113276000	113286900	10900	8818.22	1203	0	97287	Mtmr14
19	60463350	60473800	10450	8811.44	1204	0	226278	Prlhr
3	45375150	45383450	8300	8810.07	1205	0	72511	2610316D01Rik
2	174281200	174291000	9800	8809.32	1206	0	56802	Gnasas1
1	34533900	34541950	8050	8805.36	1207	0	12627	Cfc1
5	38314400	38324000	9600	8783.21	1208	0	13492	Drd5
10	89340750	89348350	7600	8770.03	1209	0	320091	Ano4
3	26327600	26336800	9200	8769.97	1210	0	192167	Nlgn1
8	122452350	122466100	13750	8767.35	1211	0	30927	Snai3
2	98662150	98663000	850	8760.46	1212	0	241568	Lrrc4c
2	180378600	180391950	13350	8759.58	1213	0	387136	Mir1a-1
11	117589000	117619100	30100	8756.15	1214	0	78403	2900041M22Rik
10	81559650	81584000	24350	8747.66	1215	0	21886	Tle2
8	119893350	119902600	9250	8742.94	1216	0	22224	Usp10
11	98382450	98394650	12200	8742.39	1217	0	320655	Pgap3
8	121385650	121401150	15500	8719.72	1218	0	108148	Galnt2
9	106143000	106151900	8900	8712.38	1219	0	235582	Glyctk
6	114395300	114406350	11050	8709.74	1220	0	15465	Hrh1
9	86874200	86884650	10450	8707.35	1221	0	20616	Snap91
1	89967000	89972900	5900	8705.75	1222	0	208372	Asb18
11	78918200	78930750	12550	8703.17	1223	0	18126	Nos2
4	44659300	44677150	17850	8699	1224	0	18507	Pax5
4	102083800	102090800	7000	8698.14	1225	0	18578	Pde4b
9	21958450	21965650	7200	8689.61	1226	0	13857	Epor
11	113614900	113622500	7600	8689.4	1227	0	69806	Slc39a11
9	34485000	34500500	15500	8684.42	1228	0	67703	Kirrel3
1	131951650	131968000	16350	8671.42	1229	0	212980	Slc45a3
6	92240400	92249400	9000	8659.83	1230	0	22044	Trh
4	49839650	49851400	11750	8647.83	1231	0	242443	Grin3a
4	154777900	154812300	34400	8644.6	1232	0	242800	Ttc34
5	25096050	25106250	10200	8629.92	1233	0	67261	2900005J15Rik
8	25096850	25105250	8400	8618.61	1234	0	83436	Plekha2
6	120488250	120499700	11450	8608.31	1235	0	94047	Tmem121b
1	172553450	172566650	13200	8598.64	1236	0	240916	Vsig8
11	97496450	97505000	8550	8597.48	1237	0	58996	Arhgap23
19	45034500	45055800	21300	8588.71	1238	0	94280	Sfxn3
1	125906550	125914900	8350	8580.07	1239	0	72585	Lypd1
7	44636700	44646850	10150	8567.99	1240	0	71960	Myh14
7	19273900	19285300	11400	8553.18	1241	0	232941	Ppm1n
18	74953300	74968300	15000	8553.05	1242	0	16891	Lipg
19	4090100	4109200	19100	8542.19	1243	0	52004	Cdk2ap2
1	136048450	136058350	9900	8525.95	1244	0	226439	Ascl5
8	85004950	85019150	14200	8524.25	1245	0	56495	Get3
12	70342300	70348500	6200	8517.59	1246	0	94090	Trim9
2	114010250	114021950	11700	8514.32	1247	0	320846	A530058N18Rik
6	55444750	55459200	14450	8504.31	1248	0	11517	Adcyap1r1
5	138749450	138759500	10050	8496.76	1249	0	80752	Fam20c
17	46440400	46449850	9450	8491.86	1250	0	106763	Ttbk1
9	78390950	78402350	11400	8481.98	1251	0	100048658	Ddx43
2	104405450	104414600	9150	8479.37	1252	0	241589	D430041D05Rik
X	98146850	98154400	7550	8479.35	1253	0	11835	Ar
17	14198800	14216450	17650	8472.96	1254	0	240025	Dact2
7	44521500	44544800	23300	8472.92	1255	0	272382	Spib
7	49242150	49251350	9200	8465.55	1256	0	78286	Nav2
1	132538300	132549000	10700	8458	1257	0	21367	Cntn2
12	76528250	76539000	10750	8441	1258	0	263406	Plekhg3
3	5859300	5861200	1900	8423.24	1259	0	19302	Pex2
5	72496300	72506400	10100	8413.55	1260	0	53419	Corin
5	129580000	129600400	20400	8405.07	1261	0	23948	Mmp17
19	56868600	56879400	10800	8402.34	1262	0	83561	Tdrd1
10	93828600	93837450	8850	8402.34	1263	0	327799	Usp44
14	34658300	34666100	7800	8400.93	1264	0	218914	Wapl
13	12097400	12108350	10950	8399.64	1265	0	20191	Ryr2
9	123460500	123462600	2100	8393.99	1266	0	102436	Lars2
1	180886350	180898500	12150	8387.96	1267	0	320202	Lefty2
4	120026150	120040350	14200	8385.13	1268	0	16656	Hivep3
6	105673600	105683800	10200	8379.35	1269	0	269784	Cntn4
3	87760950	87784100	23150	8363.72	1270	0	73182	Pear1
14	57053850	57059800	5950	8346.57	1271	0	14611	Gja3
12	54059000	54070150	11150	8335.07	1272	0	27386	Npas3
6	103506400	103514300	7900	8331.87	1273	0	12661	Chl1
19	5443350	5452200	8850	8324.21	1274	0	14283	Fosl1
7	108946900	108955750	8850	8316.88	1275	0	22141	Tub
12	82614250	82622750	8500	8305.15	1276	0	50779	Rgs6
6	142563450	142574350	10900	8286.02	1277	0	16523	Kcnj8
16	28441200	28450600	9400	8285.18	1278	0	14167	Fgf12
11	80291800	80305550	13750	8285.02	1279	0	246104	Rhbdl3
1	62700550	62712100	11550	8271.59	1280	0	18187	Nrp2
7	113204550	113212400	7850	8264.46	1281	0	11865	Bmal1
8	56618500	56626450	7950	8263.98	1282	0	50753	Fbxo8
7	109777550	109784700	7150	8263.25	1283	0	78593	Nrip3
6	77242150	77249050	6900	8260.54	1284	0	74342	Lrrtm1
8	123403400	123414950	11550	8259.51	1285	0	66855	Tcf25
2	130693000	130701550	8550	8245.2	1286	0	269356	Slc4a11
16	94172900	94194700	21800	8241.25	1287	0	110948	Hlcs
8	111386650	111400050	13400	8240.77	1288	0	338521	Fa2h
11	121153600	121163050	9450	8238.66	1289	0	217369	Uts2r
1	24582550	24590800	8250	8237.31	1290	0	12823	Col19a1
11	102391100	102405450	14350	8236.07	1291	0	68066	Slc25a39
13	96922250	96931100	8850	8218.64	1292	0	218476	Gcnt4
18	86390550	86398650	8100	8218.17	1293	0	246317	Neto1
17	57145750	57155100	9350	8211.99	1294	0	21948	Cd70
4	43422550	43432150	9600	8211.11	1295	0	329831	Cimip2b
16	92493100	92501750	8650	8204.98	1296	0	76785	2410124H12Rik
11	33838650	33854900	16250	8200.06	1297	0	70357	Kcnip1
11	116912150	116925600	13450	8179.68	1298	0	268510	Mgat5b
4	89685700	89694500	8800	8176.39	1299	0	242523	Dmrta1
1	172044000	172062000	18000	8169.76	1300	0	18071	Nhlh1
5	76854550	76861850	7300	8168.06	1301	0	320827	Cracd
9	110623350	110641250	17900	8164.21	1302	0	67169	Nradd
15	34833500	34848250	14750	8150.43	1303	0	16539	Kcns2
2	156416000	156427950	11950	8149.81	1304	0	13821	Epb41l1
18	84714750	84728900	14150	8147.79	1305	0	240479	Dipk1c
13	58803300	58813050	9750	8134.73	1306	0	18212	Ntrk2
8	104166050	104175000	8950	8129.28	1307	0	65115	Bean1
4	114776800	114803950	27150	8129.2	1308	0	433746	Gm12830
18	36278750	36288200	9450	8125.18	1309	0	19290	Pura
14	61270200	61278600	8400	8115.95	1310	0	24053	Sgcg
18	66288750	66296100	7350	8108.76	1311	0	320924	Ccbe1
13	49240250	49254350	14100	8101.46	1312	0	66329	Susd3
2	136056750	136061850	5100	8088.94	1313	0	76161	Lamp5
15	83249550	83255800	6250	8080.62	1314	0	239559	A4galt
19	41647550	41669100	21550	8077.87	1315	0	20562	Slit1
19	11812050	11821550	9500	8068.6	1316	0	20908	Stx3
2	147079000	147089000	10000	8067.19	1317	0	228731	Nkx2-4
13	54868750	54880100	11350	8064.3	1318	0	107448	Unc5a
15	76665700	76672600	6900	8062.86	1319	0	73062	Ppp1r16a
8	40283500	40290450	6950	8059.47	1320	0	80857	Fgf20
1	128588450	128596450	8000	8052	1321	0	12767	Cxcr4
3	94393700	94406250	12550	8045.93	1322	0	320747	Lingo4
4	129239150	129254450	15300	8044.75	1323	0	97130	C77080
11	105963300	105973050	9750	8042.04	1324	0	11421	Ace
14	55515050	55527450	12400	8040.35	1325	0	18185	Nrl
4	137717500	137731600	14100	8039.77	1326	0	110351	Rap1gap
18	67387200	67395600	8400	8019.9	1327	0	67951	Tubb6
3	116246850	116256650	9800	8009.59	1328	0	64378	Gpr88
12	112790500	112814150	23650	8002.41	1329	0	217887	Clba1
5	144544950	144552400	7450	8001.24	1330	0	53324	Nptx2
15	79036650	79046550	9900	7978.29	1331	0	26912	Gcat
11	35791800	35803400	11600	7971.99	1332	0	237730	Fbll1
8	119696450	119710250	13800	7971.2	1333	0	69047	Atp2c2
9	27296000	27312850	16850	7966.39	1334	0	235086	Igsf9b
5	22741200	22748800	7600	7962.25	1335	0	330052	A930003O13Rik
8	71588200	71607400	19200	7959.04	1336	0	66171	Pgls
10	29141650	29150650	9000	7957.2	1337	0	67412	Soga3
2	35576300	35596750	20450	7951.79	1338	0	69601	Dab2ip
17	69435650	69445250	9600	7938.43	1339	0	320722	Akain1
4	117921300	117933300	12000	7937.92	1340	0	20441	St3gal3
13	103327150	103339800	12650	7937.55	1341	0	328329	Mast4
6	116456550	116464350	7800	7928.72	1342	0	11689	Alox5
13	76379250	76388250	9000	7925.11	1343	0	78771	Mctp1
7	109004950	109024000	19050	7923.48	1344	0	22141	Tub
6	110642000	110649050	7050	7920.02	1345	0	108073	Grm7
2	152136750	152149050	12300	7908.47	1346	0	21407	Tcf15
2	172926150	172944100	17950	7907.49	1347	0	12162	Bmp7
2	168908600	168914050	5450	7888.89	1348	0	22722	Zfp64
7	45697500	45716900	19400	7887.7	1349	0	56632	Sphk2
11	103168300	103177400	9100	7880.02	1350	0	57778	Fmnl1
14	57128650	57141700	13050	7879.64	1351	0	14623	Gjb6
4	156254250	156256050	1800	7879.39	1352	0	231004	Samd11
14	70456650	70472550	15900	7867.54	1353	0	105653	Phyhip
7	122287300	122293650	6350	7858.8	1354	0	18751	Prkcb
8	88446250	88459000	12750	7857.74	1355	0	93960	Nkd1
11	70344450	70355000	10550	7857.72	1356	0	11687	Alox15
14	63577850	63588250	10400	7856.54	1357	0	219149	Xkr6
7	114712450	114723450	11000	7850.82	1358	0	116903	Calcb
13	13781050	13792000	10950	7842.93	1359	0	14706	Gng4
6	48736600	48745000	8400	7837.47	1360	0	317757	Gimap5
2	128118150	128129150	11000	7835.74	1361	0	74121	Acoxl
1	133351700	133375050	23350	7821.04	1362	0	214253	Etnk2
6	51428150	51442100	13950	7811.32	1363	0	18025	Nfe2l3
11	76995300	77003800	8500	7798.28	1364	0	15567	Slc6a4
7	131639600	131650750	11150	7782.33	1365	0	14183	Fgfr2
5	33100300	33107600	7300	7781.63	1366	0	20537	Slc5a1
4	125258850	125280350	21500	7779.3	1367	0	230738	Zc3h12a
15	76714000	76728850	14850	7773.45	1368	0	378937	Lrrc24
12	33926450	33931650	5200	7763.08	1369	0	114712	Ferd3l
8	70849350	70870250	20900	7762.6	1370	0	84036	Kcnn1
10	44525850	44530950	5100	7760.26	1371	0	12142	Prdm1
3	73052000	73060350	8350	7759.47	1372	0	386750	Slitrk3
15	83766200	83783300	17100	7756.65	1373	0	223726	Mpped1
16	91297000	91309000	12000	7751.99	1374	0	50914	Olig1
4	120647050	120653300	6250	7739.1	1375	0	56222	Cited4
18	37141050	37149050	8000	7729.66	1376	0	353237	Pcdhac2
12	103310950	103331500	20550	7729.11	1377	0	65256	Asb2
2	113212450	113220900	8450	7726.87	1378	0	20192	Ryr3
13	55376350	55386250	9900	7714.07	1379	0	51791	Rgs14
5	100842100	100850000	7900	7712.82	1380	0	231510	Gpat3
2	152623450	152630900	7450	7678.03	1381	0	19700	Rem1
5	30583300	30593150	9850	7677.43	1382	0	16527	Kcnk3
4	116013100	116021800	8700	7671.79	1383	0	14073	Faah
7	113764150	113770700	6550	7670.46	1384	0	233744	Spon1
6	128294650	128305600	10950	7668.45	1385	0	21679	Tead4
19	19107100	19113250	6150	7664.4	1386	0	225998	Rorb
13	95521950	95529400	7450	7656.54	1387	0	14063	F2rl1
7	143435750	143448450	12700	7654.45	1388	0	16535	Kcnq1
5	137635200	137649550	14350	7643.9	1389	0	751865	Sap25
7	45783250	45803850	20600	7638.06	1390	0	545963	Gm5897
11	70317300	70326250	8950	7632.74	1391	0	11685	Alox12e
11	3995050	4002950	7900	7629.36	1392	0	53897	Gal3st1
2	11541000	11556600	15600	7627.81	1393	0	170768	Pfkfb3
3	53651850	53659500	7650	7622.81	1394	0	242022	Frem2
8	106868200	106875050	6850	7605.28	1395	0	15118	Has3
11	61680250	61690950	10700	7599.38	1396	0	69640	Fam83g
7	46173050	46185900	12850	7594.52	1397	0	20927	Abcc8
4	138549550	138563400	13850	7562.42	1398	0	75718	Vwa5b1
1	134294450	134306250	11800	7525.12	1399	0	68507	Ppfia4
19	16432350	16441650	9300	7512.17	1400	0	14675	Gna14
6	145858500	145870450	11950	7503.47	1401	0	79362	Bhlhe41
11	112772750	112786100	13350	7503.26	1402	0	217294	BC006965
7	25310900	25319700	8800	7502.09	1403	0	330485	Tmem145
5	110333850	110346350	12500	7497.25	1404	0	381667	Lrcol1
16	35866350	35873900	7550	7494.48	1405	0	547253	Parp14
17	47434750	47443100	8350	7490.96	1406	0	75462	Cimip3
2	133547850	133556300	8450	7481.85	1407	0	12156	Bmp2
14	33346900	33356400	9500	7480.11	1408	0	239027	Arhgap22
9	108077750	108089350	11600	7476.48	1409	0	84585	Rnf123
12	61520100	61527100	7000	7474.66	1410	0	238205	Lrfn5
4	154852300	154872700	20400	7474.29	1411	0	27390	Mmel1
19	6395450	6406600	11150	7471.22	1412	0	19395	Rasgrp2
7	142367350	142378000	10650	7469.63	1413	0	320802	Ifitm10
10	90963550	90971200	7650	7459.85	1414	0	77531	Anks1b
11	115972550	115981300	8750	7456.8	1415	0	192897	Itgb4
18	67340200	67349350	9150	7446.03	1416	0	338360	B430212C06Rik
15	6869800	6877650	7850	7443.39	1417	0	18414	Osmr
4	115084550	115098800	14250	7439.54	1418	0	67182	Pdzk1ip1
7	3300450	3307100	6650	7436.26	1419	0	50918	Myadm
17	83543900	83550100	6200	7427.66	1420	0	20463	Cox7a2l
19	3406600	3420400	13800	7424.65	1421	0	17771	Tesmin
8	27171000	27178850	7850	7424.62	1422	0	75767	Rab11fip1
15	98626550	98645250	18700	7422.68	1423	0	74351	Ddx23
13	99894150	99901750	7600	7399.21	1424	0	27220	Cartpt
7	81853650	81865550	11900	7391.22	1425	0	107769	Tm6sf1
9	20863150	20880650	17500	7388.65	1426	0	70726	Angptl6
2	102655500	102664450	8950	7388.13	1427	0	20511	Slc1a2
5	35671000	35682850	11850	7386.57	1428	0	78558	Htra3
2	152905900	152921300	15400	7374.49	1429	0	228785	Mylk2
8	124747700	124755900	8200	7374.48	1430	0	69627	Fam89a
7	27650850	27662450	11600	7370.54	1431	0	73032	Ttc9b
15	54568800	54576250	7450	7369.91	1432	0	105853	Mal2
4	85199400	85210650	11250	7368.99	1433	0	20404	Sh3gl2
2	160900300	160917700	17400	7357.51	1434	0	64899	Lpin3
4	127966950	127977400	10450	7355.92	1435	0	635169	CK137956
8	123499400	123525400	26000	7346.07	1436	0	72185	Dbndd1
16	91159300	91184550	25250	7343	1437	0	50913	Olig2
4	47090500	47096450	5950	7332.52	1438	0	230145	Galnt12
9	107519050	107531850	12800	7315.42	1439	0	56808	Cacna2d2
12	20226250	20235250	9000	7309.65	1440	0	69513	1700030C10Rik
4	130160050	130178300	18250	7300.56	1441	0	94242	Tinagl1
12	106169900	106186950	17050	7296.86	1442	0	22367	Vrk1
6	120458300	120468650	10350	7294.2	1443	0	16172	Il17ra
1	69102800	69111350	8550	7290.6	1444	0	13869	Erbb4
16	5882450	5888150	5700	7286	1445	0	268859	Rbfox1
10	115583250	115590550	7300	7278.39	1446	0	14160	Lgr5
6	22285550	22291700	6150	7276.7	1447	0	93735	Wnt16
2	180220600	180232050	11450	7276.04	1448	0	16776	Lama5
2	132874150	132882300	8150	7274.81	1449	0	320974	Lrrn4
19	37231150	37241950	10800	7274.17	1450	0	102465114	Mir3084-2
6	29427250	29442450	15200	7265.88	1451	0	68794	Flnc
7	75304200	75312450	8250	7242.17	1452	0	68954	1500012K07Rik
6	148436250	148447750	11500	7236.36	1453	0	387314	Tmtc1
12	112912400	112929500	17100	7233.92	1454	0	16450	Jag2
14	8314350	8321100	6750	7233.43	1455	0	268709	Fam107a
14	108909150	108914700	5550	7209.01	1456	0	76965	Slitrk1
3	8507550	8513050	5500	7207.67	1457	0	20257	Stmn2
6	97055100	97062650	7550	7205.17	1458	0	320701	Tafa4
7	19016950	19026100	9150	7181.96	1459	0	68188	Sympk
17	29089500	29100950	11450	7180.24	1460	0	12575	Cdkn1a
5	64153950	64168200	14250	7174.06	1461	0	57915	Tbc1d1
5	101761850	101772900	11050	7172.33	1462	0	74596	Cds1
5	116587950	116597400	9450	7164.16	1463	0	68955	Srrm4
16	94116950	94129000	12050	7162.96	1464	0	20465	Sim2
10	69392250	69402300	10050	7157.24	1465	0	11735	Ank3
1	72529500	72537800	8300	7128.18	1466	0	381270	Marchf4
1	132061200	132071500	10300	7126.91	1467	0	213006	Mfsd4a
13	21978650	21988000	9350	7125.8	1468	0	195236	Pom121l2
6	54323950	54332600	8650	7113.42	1469	0	78004	Prr15
1	153182400	153190200	7800	7103.31	1470	0	16782	Lamc2
1	132734400	132744200	9800	7094.82	1471	0	269116	Nfasc
5	135128900	135138550	9650	7087.66	1472	0	58805	Mlxipl
2	181309850	181317250	7400	7083.43	1473	0	20262	Stmn3
4	123319350	123327950	8600	7081.77	1474	0	64059	Oxct2a
2	25612250	25619800	7550	7081.63	1475	0	77058	Ccdc183
15	84099400	84119350	19950	7080.85	1476	0	75772	Pnpla5
8	15008200	15018900	10700	7077.86	1477	0	74901	Kbtbd11
18	45557950	45564450	6500	7073.45	1478	0	140492	Kcnn2
6	91795200	91811050	15850	7070.66	1479	0	243547	Grip2
19	10381000	10396550	15550	7061.14	1480	0	54525	Syt7
12	17171900	17178800	6900	7057.6	1481	0	382571	Kcnf1
5	113127150	113146750	19600	7056.97	1482	0	243219	2900026A02Rik
5	150949400	150956800	7400	7054.12	1483	0	16591	Kl
14	72526800	72536400	9600	7051.14	1484	0	319448	Fndc3a
9	121774300	121781050	6750	7050.61	1485	0	72330	Klhl40
1	176271750	176279200	7450	7050.11	1486	0	319455	Pld5
2	55433850	55439000	5150	7049.55	1487	0	16519	Kcnj3
2	82049550	82056250	6700	7038.42	1488	0	241514	Zfp804a
2	130632900	130640000	7100	7031.9	1489	0	241638	Lzts3
12	29531450	29538950	7500	7028.92	1490	0	17933	Myt1l
14	118697650	118711200	13550	7023.54	1491	0	239273	Abcc4
17	34261200	34266850	5650	7022.2	1492	0	14961	H2-Ab1
11	4263100	4273100	10000	7021.46	1493	0	16878	Lif
19	41200750	41210300	9550	7020.65	1494	0	24087	Tll2
18	64657750	64665800	8050	7018.84	1495	0	54670	Atp8b1
17	29314600	29324400	9800	7018.29	1496	0	74116	Pi16
14	28500850	28513750	12900	7013.09	1497	0	22418	Wnt5a
8	71504350	71516350	12000	6997.75	1498	0	84094	Plvap
9	81626650	81636950	10300	6992.95	1499	0	319405	D430036J16Rik
1	86665700	86680500	14800	6982.52	1500	0	18159	Nppc
18	38589050	38606000	16950	6981.1	1501	0	24066	Spry4
9	110941250	110950400	9150	6966.41	1502	0	21667	Cripto
13	92128800	92135250	6450	6954.56	1503	0	19418	Rasgrf2
7	138395700	138407000	11300	6954.22	1504	0	70571	Tcerg1l
3	118429750	118438150	8400	6951.06	1505	0	387155	Mir137
8	119447000	119455200	8200	6944.59	1506	0	117148	Necab2
9	22094650	22107900	13250	6934.29	1507	0	12797	Cnn1
17	36080050	36087050	7000	6933.84	1508	0	14963	H2-Bl
17	37192400	37200550	8150	6927.44	1509	0	258219	Or2i1
5	92388700	92395850	7150	6926.31	1510	0	109979	Art3
8	120481050	120494450	13400	6920.74	1511	0	382034	Gse1
3	67512050	67521100	9050	6916.87	1512	0	109222	Rarres1
4	45751950	45773350	21400	6913.2	1513	0	100040567	Gm12409
1	165838750	165851150	12400	6912.82	1514	0	12503	Cd247
16	23979100	23988200	9100	6910.74	1515	0	12053	Bcl6
12	37105800	37112300	6500	6910.42	1516	0	17286	Meox2
6	85122900	85129150	6250	6906.55	1517	0	20751	Spr
14	122220850	122232400	11550	6906.55	1518	0	69634	Clybl
17	14275300	14285400	10100	6896.46	1519	0	64074	Smoc2
11	79585400	79595150	9750	6888.67	1520	0	268451	Rab11fip4
11	44609600	44614750	5150	6883.95	1521	0	13591	Ebf1
5	119740000	119754100	14100	6861.76	1522	0	433944	Tbx3os2
13	95439500	95447300	7800	6859.15	1523	0	12919	Crhbp
X	103317300	103325600	8300	6856.39	1524	0	12592	Cdx4
5	37960050	37978100	18050	6855.38	1525	0	71116	Stx18
16	18121450	18133500	12050	6853.67	1526	0	65079	Rtn4r
5	53044600	53054050	9450	6847.29	1527	0	20531	Slc34a2
17	90451000	90458550	7550	6846.92	1528	0	18189	Nrxn1
18	65869900	65875750	5850	6846.85	1529	0	225642	Grp
1	75251350	75266850	15500	6844.17	1530	0	19275	Ptprn
6	82399250	82407200	7950	6843.17	1531	0	21336	Tacr1
11	68945350	68960050	14700	6840.99	1532	0	442801	Arhgef15
2	125719400	125730450	11050	6838.26	1533	0	271849	Shc4
15	73736850	73756500	19650	6834.46	1534	0	19245	Ptp4a3
2	160572750	160586800	14050	6826.77	1535	0	21969	Top1
17	25713950	25724050	10100	6813.82	1536	0	64337	Gng13
X	146958400	146966050	7650	6805.77	1537	0	15560	Htr2c
5	120610550	120636250	25700	6800.64	1538	0	71990	Ddx54
8	87655900	87665450	9550	6786.53	1539	0	94187	Zfp423
16	91136200	91145550	9350	6784.21	1540	0	74387	4932438H23Rik
9	57691550	57703300	11750	6781.15	1541	0	13076	Cyp1a1
11	70457550	70467600	10050	6773.47	1542	0	66102	Cxcl16
1	86015400	86024550	9150	6772.44	1543	0	70060	Spata3
4	101493650	101500650	7000	6767.43	1544	0	72685	Dnajc6
11	95196050	95214700	18650	6765.31	1545	0	320453	Dlx4os
1	93167800	93195000	27200	6764.01	1546	0	381284	Crocc2
13	70837550	70844400	6850	6763.93	1547	0	271127	Adamts16
5	122949450	122955750	6300	6758.74	1548	0	30841	Kdm2b
9	44040000	44047650	7650	6754.51	1549	0	21838	Thy1
11	117771050	117792900	21850	6745.98	1550	0	217356	Tmc8
9	114051150	114061300	10150	6741.17	1551	0	382111	Susd5
18	15059050	15069200	10150	6741.14	1552	0	106931	Kctd1
17	46250050	46269300	19250	6740.42	1553	0	74094	Tjap1
15	80667600	80684500	16900	6738.85	1554	0	213956	Fam83f
10	80800750	80815150	14400	6731.39	1555	0	71912	Jsrp1
7	112221600	112233800	12200	6730.56	1556	0	320878	Mical2
7	118487750	118496300	8550	6729.85	1557	0	319622	Itpripl2
5	73402250	73410650	8400	6728.82	1558	0	231293	Cwh43
8	11990300	12008900	18600	6726.89	1559	0	75528	Tex29
1	135080500	135088100	7600	6724.47	1560	0	329252	Lgr6
17	24655950	24663500	7550	6720.28	1561	0	381073	Npw
6	53283150	53293350	10200	6714.55	1562	0	231991	Creb5
19	36054700	36061900	7200	6712.71	1563	0	15566	Htr7
15	83523600	83532300	8700	6709.21	1564	0	12124	Bik
5	24382600	24395250	12650	6702.61	1565	0	74610	Abcb8
16	17568850	17579200	10350	6700.11	1566	0	224022	Slc7a4
11	61373500	61381700	8200	6696.99	1567	0	67473	Slc47a1
1	164454500	164463350	8850	6693.42	1568	0	11931	Atp1b1
8	13427950	13437800	9850	6693.01	1569	0	272465	Tmem255b
19	43436100	43448350	12250	6692.17	1570	0	83674	Cnnm1
9	44285600	44291450	5850	6671.6	1571	0	192663	Abcg4
10	36504100	36510850	6750	6664.95	1572	0	319415	Hs3st5
10	121308300	121315400	7100	6664.15	1573	0	74694	Tbc1d30
4	129101900	129110050	8150	6661.9	1574	0	66260	Tmem54
15	79926700	79937300	10600	6659.36	1575	0	52609	Cbx7
1	39646850	39654500	7650	6656.53	1576	0	263764	Creg2
14	111673850	111684350	10500	6654.06	1577	0	75409	Slitrk5
17	48929200	48938300	9100	6650.72	1578	0	70530	Lrfn2
8	122222200	122236750	14550	6644.34	1579	0	108148	Galnt2
7	107366000	107375850	9850	6642.93	1580	0	60510	Syt9
11	96458850	96467450	8600	6642.93	1581	0	78473	Skap1
3	108219250	108229050	9800	6642.06	1582	0	17306	Sypl2
11	35974950	35988450	13500	6638.57	1583	0	211652	Wwc1
6	99722250	99732150	9900	6638.18	1584	0	50501	Prok2
10	58807050	58817300	10250	6629.65	1585	0	237353	Sh3rf3
1	146494300	146500100	5800	6625.38	1586	0	215378	Brinp3
1	152949250	152958500	9250	6596.23	1587	0	226518	Nmnat2
4	141362150	141375200	13050	6590.33	1588	0	277743	Fam131c
2	129035850	129043400	7550	6589.44	1589	0	668894	Vinac1
7	101449500	101460850	11350	6585.76	1590	0	207728	Pde2a
14	44856250	44861650	5400	6583.54	1591	0	19214	Ptgdr
2	181455550	181466300	10750	6580.61	1592	0	72147	Zbtb46
2	45103700	45117000	13300	6575.22	1593	0	433424	Zeb2os
7	144169300	144181500	12200	6570.35	1594	0	210274	Shank2
6	48621250	48638350	17100	6566.71	1595	0	243373	AI854703
12	40129900	40136350	6450	6562.5	1596	0	20259	Scin
15	74711500	74728750	17250	6558.74	1597	0	72373	Psca
11	100637250	100652400	15150	6553.09	1598	0	278304	Zfp385c
5	24346100	24354400	8300	6549.84	1599	0	16511	Kcnh2
9	51759250	51769050	9800	6546.43	1600	0	244867	Arhgap20
5	147952400	147960650	8250	6542.75	1601	0	77521	Mtus2
11	116214850	116227350	12500	6541.61	1602	0	69681	Cdk3
12	79129150	79136050	6900	6539.85	1603	0	11847	Arg2
14	33313250	33326650	13400	6537.96	1604	0	239027	Arhgap22
15	82060850	82074750	13900	6535.26	1605	0	74369	Mei1
17	34624600	34634500	9900	6530.11	1606	0	54397	Ppt2
10	41068800	41074650	5850	6519.37	1607	0	140741	Gpr6
12	87097400	87104950	7550	6517.79	1608	0	64242	Ngb
11	114060250	114070800	10550	6510.17	1609	0	237979	Sdk2
11	6594100	6608900	14800	6506.78	1610	0	216527	Ccm2
10	128582600	128591950	9350	6506.62	1611	0	13867	Erbb3
15	31292000	31300300	8300	6496.13	1612	0	67434	Ankrd33b
3	54911300	54919000	7700	6496.07	1613	0	329641	Sertm1
4	57132700	57143050	10350	6490.3	1614	0	54357	Epb41l4b
8	23407050	23415600	8550	6480.38	1615	0	20377	Sfrp1
5	134942650	134948650	6000	6476.96	1616	0	12740	Cldn4
3	121258900	121265950	7050	6474.13	1617	0	99887	Tlcd4
5	47982500	47988400	5900	6469.88	1618	0	20563	Slit2
4	154020550	154040100	19550	6467.84	1619	0	72946	Lrrc47
7	46345850	46354500	8650	6466.7	1620	0	17927	Myod1
19	36343900	36352150	8250	6462.29	1621	0	76073	Pcgf5
7	44833700	44847300	13600	6458.49	1622	0	233204	Tbc1d17
6	121459000	121477350	18350	6457.44	1623	0	243621	Iqsec3
14	115089000	115095250	6250	6455.3	1624	0	103978	Gpc5
10	20143550	20152450	8900	6454.66	1625	0	17761	Map7
7	19398850	19408650	9800	6452.82	1626	0	232943	Klc3
9	37134900	37151150	16250	6447.6	1627	0	208076	Pknox2
10	81019000	81028800	9800	6446.97	1628	0	208666	Diras1
6	136166550	136176900	10350	6446.95	1629	0	14812	Grin2b
5	53209350	53218050	8700	6444.11	1630	0	231238	Sel1l3
17	73705900	73715450	9550	6437.51	1631	0	71685	Galnt14
17	87281100	87294650	13550	6436.04	1632	0	74597	4833418N02Rik
10	75555050	75566450	11400	6434.68	1633	0	192734	Lrrc75b
13	108208800	108220300	11500	6429.9	1634	0	74559	Elovl7
11	84635000	84645250	10250	6428.11	1635	0	78471	1700109G15Rik
8	113844550	113854000	9450	6423.12	1636	0	208936	Adamts18
2	34906500	34918550	12050	6420.11	1637	0	74016	Phf19
4	135683400	135691700	8300	6416.99	1638	0	242700	Ifnlr1
11	115821950	115835300	13350	6412.34	1639	0	76265	Tsen54
8	66685200	66691500	6300	6410.93	1640	0	18168	Npy5r
3	97885200	97892850	7650	6410.81	1641	0	83679	Pde4dip
13	113027150	113036700	9550	6403.25	1642	0	735309	Mir449c
17	69967950	69976400	8450	6401.73	1643	0	224997	Dlgap1
6	121207100	121213350	6250	6400.31	1644	0	53857	Tuba8
4	148767700	148779850	12150	6396.13	1645	0	69743	Casz1
17	34958700	34970700	12000	6394.41	1646	0	193740	Hspa1a
3	152663100	152672650	9550	6393.41	1647	0	99542	AI115009
13	49140300	49150950	10650	6391.7	1648	0	75607	Wnk2
16	3231550	3242250	10700	6379.34	1649	0	258859	Or1f19
12	118195150	118201850	6700	6378.69	1650	0	13411	Dnah11
9	31461800	31466450	4650	6373.15	1651	0	235135	Tmem45b
2	168584750	168594800	10050	6372.23	1652	0	18019	Nfatc2
4	139999400	140007600	8200	6364.56	1653	0	230868	Igsf21
1	105775750	105784050	8300	6357.87	1654	0	21934	Tnfrsf11a
5	127233950	127246450	12500	6342.16	1655	0	208213	Tmem132c
1	129270400	129276800	6400	6333.97	1656	0	210417	Thsd7b
19	47243850	47261500	17650	6329.6	1657	0	18011	Neurl1a
1	104767000	104774000	7000	6322.52	1658	0	23836	Cdh20
14	34216200	34223850	7650	6319.94	1659	0	319508	Syt15
11	96118850	96131850	13000	6307.6	1660	0	237930	Ttll6
12	72827750	72839350	11600	6304.89	1661	0	19042	Ppm1a
11	61338850	61344850	6000	6288.18	1662	0	67473	Slc47a1
19	28676050	28682050	6000	6286.15	1663	0	320176	D930032P07Rik
4	3058150	3070950	12800	6285	1664	0	100312470	Vmn1r2
2	5132750	5144450	11700	6283.03	1665	0	74186	Ccdc3
15	92394600	92401650	7050	6283.02	1666	0	239618	Pdzrn4
10	51675100	51681550	6450	6281.76	1667	0	320995	Rfx6
1	133321300	133333500	12200	6277.82	1668	0	68338	Golt1a
8	117491650	117507250	15600	6274.6	1669	0	234779	Plcg2
17	66445600	66454050	8450	6264.48	1670	0	68617	Mtcl1
2	13789450	13796850	7400	6264.09	1671	0	241230	St8sia6
4	126277750	126290250	12500	6258.72	1672	0	329941	Col8a2
13	98387950	98397050	9100	6254.43	1673	0	70090	2310005E17Rik
17	8519550	8529800	10250	6250.85	1674	0	23984	Pde10a
17	25566800	25578100	11300	6246.85	1675	0	72834	Cerox1
2	163368600	163380500	11900	6240.09	1676	0	59091	Jph2
14	68119250	68127950	8700	6239.63	1677	0	18040	Nefm
15	78800350	78805900	5550	6239.08	1678	0	105844	Card10
10	18841500	18848100	6600	6232.46	1679	0	64058	Perp
8	118282450	118289600	7150	6232.17	1680	0	12554	Cdh13
X	36323300	36334450	11150	6224.32	1681	0	74365	Lonrf3
19	59070700	59079650	8950	6216.27	1682	0	71653	Shtn1
1	154879300	154887800	8500	6215.52	1683	0	12290	Cacna1e
13	25052400	25060250	7850	6210.66	1684	0	195208	Dcdc2a
8	120728450	120741200	12750	6210.52	1685	0	15900	Irf8
16	20731150	20740350	9200	6203.27	1686	0	21832	Thpo
4	107839900	107849900	10000	6189.67	1687	0	16975	Lrp8
X	73631150	73642450	11300	6189.37	1688	0	75590	Dusp9
8	50913050	50921000	7950	6187.9	1689	0	100039954	Gm2516
10	88884450	88889650	5200	6179.96	1690	0	216225	Slc5a8
19	46756650	46767800	11150	6175.22	1691	0	94219	Cnnm2
7	100972250	100976400	4150	6175.12	1692	0	233571	P2ry6
8	88998200	89009700	11500	6170.92	1693	0	102465899	Mir8110
8	120111950	120121900	9950	6170.83	1694	0	234797	6430548M08Rik
19	43533900	43552350	18450	6167.06	1695	0	102465114	Mir3084-2
14	63737400	63746300	8900	6166	1696	0	219149	Xkr6
10	70242250	70246600	4350	6165.73	1697	0	66859	Slc16a9
9	75228900	75237600	8700	6150.15	1698	0	208943	Myo5c
2	129694850	129705550	10700	6143.92	1699	0	18610	Pdyn
2	17727050	17734550	7500	6132.27	1700	0	74103	Nebl
3	158558000	158563950	5950	6131.17	1701	0	242274	Lrrc7
4	136418850	136432550	13700	6128.91	1702	0	15552	Htr1d
7	64499000	64509750	10750	6128.88	1703	0	11784	Apba2
2	121287550	121300650	13100	6127.56	1704	0	17754	Map1a
18	82472850	82483700	10850	6126.35	1705	0	17196	Mbp
11	117855400	117867000	11600	6121.66	1706	0	546519	Tmem235
11	59959500	59967150	7650	6120.84	1707	0	19416	Rasd1
9	23219150	23232300	13150	6106.7	1708	0	73230	Bmper
5	143153450	143165100	11650	6093.59	1709	0	100042605	Rbakdn
11	63124150	63139250	15100	6087.21	1710	0	18858	Pmp22
11	102882250	102900250	18000	6083.45	1711	0	73293	Ccdc103
4	148837500	148853300	15800	6076.03	1712	0	69743	Casz1
1	193150350	193157700	7350	6075.09	1713	0	54139	Irf6
4	53773800	53781150	7350	6069.84	1714	0	246179	Fktn
18	36720050	36732950	12900	6068.52	1715	0	12475	Cd14
8	91859100	91879600	20500	6067.54	1716	0	16373	Irx3
4	123223900	123241400	17500	6062.01	1717	0	56198	Heyl
10	61624350	61631700	7350	6061.67	1718	0	237362	Npffr1
6	86188000	86201400	13400	6060.43	1719	0	21802	Tgfa
10	11078800	11082400	3600	6059.98	1720	0	14816	Grm1
5	37087000	37094300	7300	6057.77	1721	0	76071	Jakmip1
8	27081750	27094250	12500	6052.05	1722	0	78560	Adgra2
7	28627900	28635550	7650	6034.86	1723	0	101744	Acp7
7	19062800	19067850	5050	6028.1	1724	0	83434	Rsph6a
2	164481800	164488900	7100	6026.71	1725	0	52840	Dbndd2
5	108545200	108555650	10450	6013.48	1726	0	12889	Cplx1
15	86027700	86036650	8950	6004.87	1727	0	12614	Celsr1
5	117408750	117419000	10250	6001.41	1728	0	333050	Ksr2
18	23305450	23313350	7900	5999.07	1729	0	665797	Gm7788
11	88185400	88198150	12750	5996.09	1730	0	103841	Cuedc1
6	39114450	39121050	6600	5995.46	1731	0	75379	4930599N23Rik
9	110718200	110736400	18200	5984.48	1732	0	19228	Pth1r
8	84332850	84348950	16100	5981.95	1733	0	12286	Cacna1a
3	117571800	117578900	7100	5978.47	1734	0	75769	Plppr5
8	12551950	12566450	14500	5977.8	1735	0	78634	Spaca7
3	100483550	100492450	8900	5974.22	1736	0	74645	Tent5c
4	138687700	138697850	10150	5971.08	1737	0	212190	Ubxn10
3	125933550	125942750	9200	5970.51	1738	0	22239	Ugt8a
7	29274300	29295850	21550	5970.19	1739	0	68458	Ppp1r14a
4	41624550	41643600	19050	5956.72	1740	0	69638	Enho
16	44328300	44337200	8900	5952.83	1741	0	320007	Sidt1
6	28828250	28836850	8600	5949.56	1742	0	56463	Snd1
3	127744100	127753450	9350	5947.44	1743	0	71481	Alpk1
6	28393350	28400900	7550	5945.54	1744	0	627049	Zfp800
18	64262300	64267350	5050	5939.06	1745	0	73588	St8sia3os
11	103329000	103337900	8900	5935.87	1746	0	544817	Arhgap27
12	83482100	83490150	8050	5935.44	1747	0	70127	Dpf3
13	42297250	42305800	8550	5931.85	1748	0	13614	Edn1
3	153969350	153977200	7850	5928.85	1749	0	242259	Slc44a5
4	108026100	108036450	10350	5928.83	1750	0	242608	Podn
11	103073300	103084350	11050	5927.6	1751	0	72469	Plcd3
7	84082300	84089950	7650	5919.04	1752	0	80982	Cemip
2	118971250	118979850	8600	5917.33	1753	0	269336	Ccdc32
10	64085700	64091850	6150	5911.91	1754	0	216033	Ctnna3
11	118501550	118513750	12200	5903.76	1755	0	52897	Rbfox3
5	122043500	122049950	6450	5898.76	1756	0	13048	Cux2
10	61590000	61599500	9500	5897.98	1757	0	237362	Npffr1
11	97135700	97144050	8350	5895.78	1758	0	73174	Tbkbp1
14	63494650	63512050	17400	5891.46	1759	0	58865	Tdh
4	154559950	154577750	17800	5887.37	1760	0	70673	Prdm16
2	31452500	31461400	8900	5882.6	1761	0	665700	Hmcn2
5	69337550	69343200	5650	5876.47	1762	0	243043	Kctd8
8	13194800	13207000	12200	5874.22	1763	0	66790	Grtp1
7	107204750	107214600	9850	5866.54	1764	0	76572	Rbmxl2
1	173365100	173371500	6400	5865.31	1765	0	94332	Cadm3
15	66281100	66289400	8300	5864.79	1766	0	110862	Kcnq3
19	50673000	50680650	7650	5861.25	1767	0	58178	Sorcs1
12	85470500	85479200	8700	5857.6	1768	0	14281	Fos
16	94323000	94333850	10850	5857.07	1769	0	170765	Ripply3
7	97323300	97333700	10400	5855.17	1770	0	622320	Kctd21
6	143830900	143846350	15450	5853.54	1771	0	20678	Sox5
6	136659200	136664500	5300	5847.86	1772	0	66857	Plbd1
17	47463350	47471700	8350	5829.4	1773	0	224833	AI661453
11	100138500	100148050	9550	5824.32	1774	0	16669	Krt19
5	131303000	131309000	6000	5817.23	1775	0	212996	Galnt17
7	27441800	27449550	7750	5810.77	1776	0	80297	Sptbn4
1	9295200	9303200	8000	5810.24	1777	0	71096	Sntg1
15	71722450	71732500	10050	5807.69	1778	0	70363	Fam135b
2	132026450	132032450	6000	5806.49	1779	0	215653	Rassf2
3	98424450	98430950	6500	5802.38	1780	0	242109	Zfp697
14	124188700	124196250	7550	5798.95	1781	0	14169	Fgf14
17	8387250	8392750	5500	5797.87	1782	0	21331	T2
4	132139800	132146650	6850	5791.53	1783	0	18386	Oprd1
14	65420200	65427200	7000	5790.06	1784	0	18155	Pnoc
1	172488600	172504000	15400	5786.85	1785	0	93842	Igsf9
17	31293650	31301100	7450	5786.05	1786	0	224674	Slc37a1
8	80609700	80616350	6650	5783.62	1787	0	333315	Frem3
6	83157950	83164800	6850	5782.47	1788	0	71837	1700003E16Rik
15	89495650	89507350	11700	5777.51	1789	0	58234	Shank3
16	60603650	60607350	3700	5777.48	1790	0	13840	Epha6
7	65151250	65159850	8600	5776.54	1791	0	70638	Entrep2
13	62882500	62891650	9150	5772.72	1792	0	14121	Fbp1
15	101124300	101137750	13450	5770	1793	0	11482	Acvrl1
2	180637800	180642600	4800	5764.09	1794	0	277353	Tcfl5
3	92078700	92084950	6250	5760.15	1795	0	16939	Lor
14	70520100	70535100	15000	5754.96	1796	0	213469	Lgi3
9	57982650	58002050	19400	5750.45	1797	0	13070	Cyp11a1
2	117337600	117346100	8500	5747.19	1798	0	19419	Rasgrp1
15	82944450	82963450	19000	5734	1799	0	21411	Tcf20
9	106650050	106663800	13750	5733.23	1800	0	21767	Tex264
1	34455150	34464150	9000	5729.16	1801	0	19253	Ptpn18
2	151966900	151981350	14450	5726.49	1802	0	73847	Fam110a
6	54938550	54948500	9950	5722.84	1803	0	107607	Nod1
4	108214350	108222500	8150	5719.34	1804	0	230590	Zyg11a
3	31306850	31314500	7650	5718.72	1805	0	241919	Slc7a14
7	24494050	24505850	11800	5718.53	1806	0	260299	Cadm4
10	43018250	43025700	7450	5717.81	1807	0	109205	Sobp
7	121861350	121869100	7750	5715.77	1808	0	20277	Scnn1b
11	28579550	28586400	6850	5709.45	1809	0	216613	Ccdc85a
4	120848150	120863400	15250	5707.41	1810	0	242662	Rims3
14	44985600	44993700	8100	5707.41	1811	0	73895	4930431P03Rik
10	117626700	117633300	6600	5703.23	1812	0	70574	Cpm
6	88232700	88248300	15600	5695.3	1813	0	65967	Eefsec
7	129254750	129261300	6550	5674.17	1814	0	381925	Plpp4
19	60140950	60150550	9600	5671.29	1815	0	107376	E330013P04Rik
10	80429500	80453250	23750	5671.05	1816	0	21423	Tcf3
4	125188150	125205050	16900	5668.74	1817	0	230738	Zc3h12a
13	98427300	98434850	7550	5667.17	1818	0	70090	2310005E17Rik
12	75171050	75182300	11250	5661.84	1819	0	238271	Kcnh5
4	42915200	42920300	5100	5651.52	1820	0	230085	Phf24
11	118730900	118748050	17150	5650.49	1821	0	52897	Rbfox3
14	60171400	60181100	9700	5646.65	1822	0	50769	Atp8a2
4	43658200	43671350	13150	5643.07	1823	0	242409	Tmem8b
2	179433350	179445450	12100	5640.66	1824	0	12561	Cdh4
17	34126750	34141900	15150	5632.64	1825	0	14998	H2-DMa
2	151698100	151709100	11000	5632.2	1826	0	108832	Tmem74b
1	185451550	185458050	6500	5632.11	1827	0	226781	Slc30a10
10	24220700	24227550	6850	5624.26	1828	0	59012	Moxd1
7	140149100	140158250	9150	5620.49	1829	0	212518	Sprn
2	151840350	151847250	6900	5617.16	1830	0	228770	Rspo4
14	122253250	122262200	8950	5613.3	1831	0	69634	Clybl
12	105555600	105566150	10550	5612.73	1832	0	12062	Bdkrb2
2	92912450	92919400	6950	5610.48	1833	0	80976	Syt13
4	127210000	127219350	9350	5609.08	1834	0	242667	Dlgap3
8	105609350	105622650	13300	5607.55	1835	0	75687	Ripor1
1	171434450	171444650	10200	5605.42	1836	0	16456	F11r
15	95524650	95531350	6700	5602.96	1837	0	54003	Nell2
5	114564600	114578350	13750	5602.5	1838	0	433940	Fam222a
8	13488600	13497100	8500	5597.37	1839	0	14456	Gas6
10	121343850	121354800	10950	5595.71	1840	0	74694	Tbc1d30
14	54466750	54484100	17350	5594.12	1841	0	65107	Lrp10
10	83330000	83340400	10400	5586.2	1842	0	338365	Slc41a2
1	36296100	36314300	18200	5584.84	1843	0	214855	Arid5a
6	17305100	17310450	5350	5573.65	1844	0	12389	Cav1
2	29189900	29205450	15550	5572.49	1845	0	171171	Ntng2
8	92454550	92463100	8550	5564.94	1846	0	54352	Irx5
9	45037250	45045300	8050	5563.88	1847	0	14012	Mpzl2
5	139321400	139331250	9850	5548.53	1848	0	231821	Adap1
16	16209000	16217300	8300	5545.05	1849	0	67451	Pkp2
4	124173950	124181850	7900	5544.77	1850	0	78460	1700057H15Rik
18	42895400	42902100	6700	5539.58	1851	0	72930	Ppp2r2b
12	44324700	44334050	9350	5534.45	1852	0	319504	Nrcam
11	30019400	30026800	7400	5531.77	1853	0	237711	Eml6
18	25710200	25725200	15000	5520.68	1854	0	108013	Celf4
17	36986650	36991750	5100	5518.1	1855	0	240095	H2-M5
19	23888950	23896450	7500	5517.23	1856	0	319924	Apba1
11	84695250	84711900	16650	5517.1	1857	0	78471	1700109G15Rik
10	13059000	13066300	7300	5515.21	1858	0	22634	Plagl1
2	11703100	11711550	8450	5511.38	1859	0	16169	Il15ra
2	164852300	164860450	8150	5508.92	1860	0	18830	Pltp
1	78305500	78313850	8350	5504.21	1861	0	433323	Sgpp2
10	81188650	81198150	9500	5494.51	1862	0	69678	Atcayos
7	126947300	126957150	9850	5492.58	1863	0	233879	Asphd1
7	73369300	73379250	9950	5491.94	1864	0	319783	A730056A06Rik
11	94470500	94479650	9150	5482.91	1865	0	217116	Spata20
9	54065300	54071500	6200	5482.51	1866	0	244882	Tnfaip8l3
4	45575500	45595000	19500	5477.1	1867	0	230126	Shb
5	121921150	121930900	9750	5471.74	1868	0	13048	Cux2
16	84770800	84781350	10550	5463.15	1869	0	67374	Jam2
7	132147200	132157250	10050	5462.55	1870	0	55987	Cpxm2
3	129962950	129972950	10000	5451.41	1871	0	66815	Mcub
4	156030050	156036600	6550	5447.16	1872	0	330010	Ttll10
11	95071900	95083400	11500	5440.51	1873	0	16400	Itga3
6	90459600	90475100	15500	5438.66	1874	0	66277	Klf15
3	152979000	152984800	5800	5436.02	1875	0	329777	Pigk
2	172785950	172793050	7100	5427.96	1876	0	12162	Bmp7
15	101409600	101422150	12550	5427.85	1877	0	110310	Krt7
13	54788150	54801150	13000	5425.13	1878	0	74257	Tspan17
3	13468850	13475400	6550	5424.98	1879	0	76897	Ralyl
2	92365300	92377600	12300	5423.99	1880	0	228366	Large2
8	124428750	124437000	8250	5423.42	1881	0	209966	Pgbd5
11	73155100	73165550	10450	5423.25	1882	0	94045	P2rx5
19	5049250	5055450	6200	5421.59	1883	0	225870	Rin1
11	81964450	81973800	9350	5418.65	1884	0	11418	Asic2
13	114453750	114460000	6250	5417.01	1885	0	14313	Fst
7	44945600	44953550	7950	5411.33	1886	0	22116	Tsks
11	100848200	100865850	17650	5410.05	1887	0	20851	Stat5b
16	96276350	96284800	8450	5403.47	1888	0	93961	B3galt5
16	17275400	17285200	9800	5401.92	1889	0	224020	Pi4ka
18	63383450	63390400	6950	5396.23	1890	0	667742	Piezo2
2	143543550	143550100	6550	5385.69	1891	0	378776	Pcsk2os1
18	24706550	24714300	7750	5384.1	1892	0	225288	Fhod3
5	84413450	84419400	5950	5378.16	1893	0	13839	Epha5
9	44073850	44091550	17700	5373.16	1894	0	53376	Usp2
15	80089150	80095100	5950	5369.89	1895	0	27367	Rpl3
9	28399550	28406750	7200	5366.64	1896	0	330908	Opcml
10	81399050	81415150	16100	5355.12	1897	0	18029	Nfic
X	110810050	110820400	10350	5343.91	1898	0	18994	Pou3f4
11	94929500	94949300	19800	5337.43	1899	0	12842	Col1a1
15	89838600	89845450	6850	5335.03	1900	0	54526	Syt10
8	123230650	123238500	7850	5334.38	1901	0	78779	Spata2l
12	84622500	84630200	7700	5334.11	1902	0	19300	Abcd4
3	131486250	131496400	10150	5333.85	1903	0	74442	Sgms2
12	72406300	72410650	4350	5330.52	1904	0	104001	Rtn1
7	121732750	121739350	6600	5329.87	1905	0	20278	Scnn1g
11	50235100	50241500	6400	5329.28	1906	0	17001	Ltc4s
8	31086950	31095050	8100	5328.2	1907	0	66959	Dusp26
7	29016450	29025000	8550	5323.52	1908	0	20190	Ryr1
3	127693250	127705100	11850	5320.23	1909	0	71481	Alpk1
15	39854050	39860400	6350	5320.04	1910	0	64705	Dpys
18	38987550	38998600	11050	5310.48	1911	0	71302	Arhgap26
14	47371350	47378850	7500	5310.48	1912	0	16854	Lgals3
11	98287750	98301500	13750	5308.8	1913	0	69131	Cdk12
11	95637700	95653450	15750	5308.46	1914	0	18673	Phb1
2	42649250	42655400	6150	5306.15	1915	0	94217	Lrp1b
4	137661300	137669500	8200	5304.79	1916	0	110351	Rap1gap
1	22529100	22538550	9450	5299.45	1917	0	116837	Rims1
13	43298750	43306050	7300	5296.1	1918	0	328232	Gfod1
8	120531100	120544600	13500	5288.25	1919	0	74227	1700016A09Rik
5	135083400	135096650	13250	5285.41	1920	0	58805	Mlxipl
11	98442650	98456750	14100	5278.26	1921	0	14786	Grb7
2	127836350	127843650	7300	5274.5	1922	0	74121	Acoxl
11	116331200	116339250	8050	5271.01	1923	0	217340	Rnf157
15	97763400	97774450	11050	5270.95	1924	0	223864	Rapgef3
17	80940550	80948300	7750	5268.7	1925	0	68027	Tmem178
13	107643500	107652200	8700	5266.32	1926	0	72257	1700006H21Rik
5	139809150	139820950	11800	5263.87	1927	0	231832	Tmem184a
18	25615100	25633350	18250	5262.91	1928	0	108013	Celf4
2	5707250	5717500	10250	5260.3	1929	0	227541	Camk1d
11	69194950	69202900	7950	5247.81	1930	0	11688	Alox8
3	96522850	96533000	10150	5247.72	1931	0	69585	Hjv
15	38468000	38477250	9250	5238.81	1932	0	54375	Azin1
18	80294350	80301100	6750	5237.1	1933	0	240444	Kcng2
3	40526600	40535650	9050	5235.13	1934	0	380614	Intu
2	127331350	127348800	17450	5233.08	1935	0	215095	Astl
3	154660600	154669550	8950	5228.19	1936	0	209601	Erich3
13	63566800	63577700	10900	5223.95	1937	0	19206	Ptch1
17	35390400	35398750	8350	5223.56	1938	0	15016	H2-Q5
2	5376450	5379900	3450	5222.96	1939	0	227541	Camk1d
X	99816400	99826200	9800	5213.16	1940	0	620592	Nalf2
2	168043600	168057750	14150	5209	1941	0	58220	Pard6b
13	35963550	35970950	7400	5206.03	1942	0	76487	Ppp1r3g
11	101779100	101789100	10000	5204.92	1943	0	18612	Etv4
5	120197900	120215600	17700	5203.73	1944	0	74111	Rbm19
19	24995900	25004550	8650	5201.48	1945	0	76088	Dock8
4	41091250	41100450	9200	5201.03	1946	0	11828	Aqp3
11	47981650	47991500	9850	5196.98	1947	0	24052	Sgcd
9	55321100	55333900	12800	5196.87	1948	0	83961	Nrg4
13	43780300	43792050	11750	5196.86	1949	0	12522	Cd83
17	71305750	71313650	7900	5188.39	1950	0	246707	Emilin2
6	122739700	122748350	8650	5187.16	1951	0	20527	Slc2a3
2	21365150	21371350	6200	5185.14	1952	0	241263	Gpr158
4	135393750	135401600	7850	5183.37	1953	0	230822	Ncmap
5	103690900	103701700	10800	5182.59	1954	0	17355	Aff1
17	57210150	57231000	20850	5179.51	1955	0	12266	C3
12	111480250	111492250	12000	5176.82	1956	0	212539	Gm266
17	57270700	57282600	11900	5171.17	1957	0	22324	Vav1
10	7866500	7870600	4100	5166.01	1958	0	237256	Zc3h12d
19	28827700	28841900	14200	5164.25	1959	0	20510	Slc1a1
4	154472300	154485600	13300	5163.18	1960	0	70673	Prdm16
2	153520550	153532000	11450	5162.52	1961	0	329540	Nol4l
14	17658800	17665200	6400	5158.43	1962	0	21834	Thrb
11	5859250	5873100	13850	5150.6	1963	0	18972	Pold2
1	132134450	132155250	20800	5150.51	1964	0	18557	Cdk18
18	72346150	72353000	6850	5149.65	1965	0	13176	Dcc
5	39641400	39649100	7700	5148.97	1966	0	15476	Hs3st1
6	137247300	137257000	9700	5148.89	1967	0	19277	Ptpro
6	72227850	72241050	13200	5140.89	1968	0	71093	Atoh8
16	97355050	97363650	8600	5140.39	1969	0	56175	Bace2
17	32097300	32103700	6400	5136.92	1970	0	435518	Pdxk-ps
6	117166200	117174500	8300	5135	1971	0	20315	Cxcl12
4	154060400	154071850	11450	5131.88	1972	0	22062	Trp73
12	101024200	101030450	6250	5127.27	1973	0	68339	Ccdc88c
7	43469900	43479450	9550	5120.38	1974	0	75690	Vsig10l
17	23641350	23645650	4300	5118.81	1975	0	240047	Mmp25
3	145961200	145966650	5450	5117.47	1976	0	66421	2410004B18Rik
11	109010750	109012250	1500	5111.1	1977	0	12006	Axin2
2	49784150	49791650	7500	5108.59	1978	0	71897	Lypd6b
13	42707150	42712450	5300	5100.61	1979	0	218194	Phactr1
6	118063100	118069900	6800	5100.55	1980	0	70727	Rasgef1a
5	136616200	136628800	12600	5096.37	1981	0	13047	Cux1
12	81329800	81337150	7350	5092.17	1982	0	110893	Slc8a3
4	154295600	154303750	8150	5092.05	1983	0	230972	Arhgef16
1	166250500	166263300	12800	5090.54	1984	0	100039795	Ildr2
5	141238050	141246450	8400	5088.57	1985	0	330222	Sdk1
9	49335500	49346000	10500	5088.52	1986	0	13489	Drd2
8	125893750	125899600	5850	5083.46	1987	0	270109	Pcnx2
12	16649350	16658300	8950	5081.15	1988	0	18217	Ntsr2
3	127786850	127793700	6850	5077.84	1989	0	211550	Tifa
10	93637650	93644800	7150	5075.62	1990	0	57764	Ntn4
7	46091650	46110950	19300	5073.63	1991	0	20927	Abcc8
18	24461200	24469650	8450	5068.83	1992	0	68046	2700062C07Rik
8	91987400	92002850	15450	5065.08	1993	0	16373	Irx3
15	84067400	84077950	10550	5063.36	1994	0	29859	Sult4a1
10	77412300	77421250	8950	5063.26	1995	0	110532	Adarb1
14	118318000	118326800	8800	5056.99	1996	0	73306	1700044C05Rik
8	29214200	29221400	7200	5055.61	1997	0	210801	Unc5d
3	80797300	80804700	7400	5054.34	1998	0	14800	Gria2
[truncated: 575 more rows]
