# Supplementary material for: Eed controls craniofacial osteoblast differentiation and mesenchymal proliferation from the neural crest
Source: eLife. 2025 Dec 2;13:RP100159. doi: 10.7554/eLife.100159 (PMC12671911; doi:10.7554/eLife.100159)
Supplement: Supplementary file 8. [file elife-100159-supp8.xlsx]

## Sheet: Supplementary_File_8
Supplementary File 8. Methylation rank and nearest gene coordinates from CUT&Tag H3K27me3 sequencing of E12.5 Sox10-Cre; EedFl/Fl craniofacial tissues.
Chromosome	START	STOP	CONSTITUENT_SIZE	E12.5_KO_merged.bam	Methylation rank	Is past inflection point	nearestEntrez	nearestGene
17	39842900	39848850	5950	391910	1	1	100861531	Rn45s
11	3124600	3200500	75900	306116	2	1	78887	Sfi1
15	102903100	103047100	144000	249512	3	1	751557	Mir615
6	52148500	52255400	106900	211898	4	1	77580	5730596B20Rik
11	96248500	96358650	110150	198280	5	1	75395	Hoxb5os
11	96163700	96216250	52550	75150.2	6	1	237930	Ttll6
14	63234200	63273550	39350	72609.5	7	1	14463	Gata4
8	57310750	57355900	45150	68317.7	8	1	75996	Hdnr
9	91349700	91412200	62500	64946.2	9	1	22774	Zic4
1	120590350	120621000	30650	62246.3	10	1	13798	En1
3	129194000	129228900	34900	61186.2	11	1	18741	Pitx2
19	45219050	45249200	30150	59656.2	12	1	16814	Lbx1
19	45136950	45166100	29150	59518.8	13	1	21908	Tlx1
2	105658300	105694250	35950	59453.4	14	1	402728	Pax6os1
11	98314800	98359150	44350	59004.1	15	1	69338	1700003D09Rik
5	35376650	35410400	33750	58622.5	16	1	442795	E130018O15Rik
5	28152150	28184350	32200	56605.2	17	1	13799	En2
6	83690700	83723100	32400	56076.3	18	1	574519	Vax2os
8	121068000	121094900	26900	55882.5	19	1	68790	Fendrr
16	94074950	94102150	27200	55793.7	20	1	20465	Sim2
1	89916650	89946800	30150	54514	21	1	14472	Gbx2
11	119033750	119062200	28450	52685.2	22	1	30951	Cbx8
5	106445050	106473050	28000	51574.3	23	1	104382	Barhl2
9	74845400	74869050	23650	51339.4	24	1	15379	Onecut1
1	88211100	88270250	59150	51059.6	25	1	94284	Ugt1a6a
4	89270300	89315550	45250	51005.9	26	1	12579	Cdkn2b
9	63131050	63154150	23100	50989.6	27	1	207667	Skor1
5	29464350	29492450	28100	50859.1	28	1	15285	Mnx1
2	148021750	148055050	33300	50354.4	29	1	15376	Foxa2
6	6849450	6884450	35000	50251.6	30	1	320038	Dlx6os1
1	184711700	184741650	29950	49422.1	31	1	74971	4930488B22Rik
5	119654950	119691850	36900	49023	32	1	433944	Tbx3os2
7	131539700	131558850	19150	47993.9	33	1	15373	Hmx3
3	99232100	99268700	36600	47618.2	34	1	70560	Wars2
6	88185700	88210800	25100	46766.7	35	1	14461	Gata2
2	9868600	9900400	31800	46276.2	36	1	77682	Gata3un
17	85607200	85634900	27700	46264.2	37	1	20473	Six3
2	71522550	71553650	31100	45828.6	38	1	66559	Metap1d
17	26833650	26859450	25800	45780.5	39	1	18091	Nkx2-5
13	31611850	31634250	22400	45325.6	40	1	71307	1700018A04Rik
5	139534650	139561700	27050	44992.4	41	1	74973	4930500L23Rik
11	84512150	84535300	23150	43976.4	42	1	78365	Lhx1os
8	12379050	12410400	31350	43896.3	43	1	434280	Sox1ot
13	55820100	55843800	23700	43231.5	44	1	18740	Pitx1
2	36088050	36111500	23450	43227.5	45	1	16874	Lhx6
5	41745300	41769100	23800	43073.2	46	1	12020	Nkx3-2
2	31630750	31657250	26500	42878.1	47	1	381359	Prdm12
16	91216650	91239450	22800	42113.3	48	1	50913	Olig2
13	48651650	48676950	25300	42088.2	49	1	12022	Barx1
8	69877550	69896500	18950	41796.5	50	1	68709	Cilp2
11	85820200	85849450	29250	41166.1	51	1	69909	2610027K06Rik
1	155717450	155754550	37100	41160.1	52	1	16872	Lhx4
7	79495450	79522800	27350	41052	53	1	723968	Mir9-3
12	56517350	56543050	25700	40935.9	54	1	21869	Nkx2-1
5	37812000	37839800	27800	40723.1	55	1	17701	Msx1
12	57530300	57557950	27650	39924	56	1	15375	Foxa1
2	147177450	147199150	21700	39774.5	57	1	78068	6430503K07Rik
10	127506150	127543000	36850	39455.1	58	1	407790	Ndufa4l2
2	38334600	38361950	27350	39385	59	1	16870	Lhx2
11	33192850	33209150	16300	38577.2	60	1	27140	Tlx3
4	109969500	109988400	18900	38513	61	1	242620	Dmrta2
1	42683050	42717300	34250	38101.5	62	1	66620	Pantr2
10	42570100	42597100	27000	37888.7	63	1	21907	Nr2e1
5	75064850	75088950	24100	37788.6	64	1	14843	Gsx2
12	56679450	56703700	24250	37666.2	65	1	18511	Pax9
3	88191100	88223300	32200	37363	66	1	387133	Mir9-1
13	73256050	73275700	19650	37116.2	67	1	50916	Irx4
19	37682050	37702550	20500	36642.3	68	1	546726	Cyp26c1
13	72620750	72644050	23300	36461.4	69	1	328287	Gm20554
10	50888400	50912750	24350	36205.7	70	1	20464	Sim1
4	44698500	44719150	20650	36138.1	71	1	70602	5730488B01Rik
13	94862400	94888750	26350	35506.7	72	1	18420	Otp
18	64330050	64349650	19600	35386.7	73	1	73588	St8sia3os
2	105117700	105139000	21300	35287.3	74	1	329480	Wt1os
1	19206500	19243150	36650	35222	75	1	21419	Tfap2b
4	114894600	114919050	24450	35089.8	76	1	17301	Foxd2
11	57823150	57842150	19000	35083.4	77	1	15110	Hand1
2	28902200	28924550	22350	34784.4	78	1	54422	Barhl1
2	147357250	147375400	18150	34640	79	1	99041	AI646519
5	33426050	33445650	19600	34484.2	80	1	672284	Nkx1-1
1	74876400	74907150	30750	33108	81	1	723900	Mir375
4	21668500	21693750	25250	32400.5	82	1	230025	Prdm13
11	85883700	85899450	15750	32301.1	83	1	21387	Tbx4
5	119791950	119809950	18000	31962	84	1	21388	Tbx5
19	59449650	59473900	24250	31939	85	1	329078	Emx2os
16	18573700	18592450	18750	31581	86	1	21380	Tbx1
5	107716550	107729350	12800	31291.2	87	1	14581	Gfi1
17	85678850	85697050	18200	31273.2	88	1	20472	Six2
4	115046750	115067650	20900	31251.6	89	1	21349	Tal1
9	69751850	69774900	23050	31184.6	90	1	64290	Foxb1
9	99863000	99882450	19450	30838.3	91	1	20669	Sox14
5	101644550	101670450	25900	30693	92	1	18096	Nkx6-1
18	76843150	76862200	19050	30362	93	1	664805	Skor2
9	98949500	98966300	16800	30349	94	1	768252	Foxl2os
14	12332000	12352650	20650	30186.1	95	1	54713	Fezf2
5	147265100	147281150	16050	29772.3	96	1	70147	Plut
4	99646200	99664250	18050	29700.5	97	1	15221	Foxd3
18	53458500	53476700	18200	29633.6	98	1	225518	Prdm6
10	19350650	19364250	13600	29538	99	1	94222	Olig3
4	22476250	22499300	23050	28434.6	100	1	18992	Pou3f2
8	105250600	105281100	30500	28370.6	101	1	97440	B3gnt9
3	34637900	34671300	33400	28269.9	102	1	320478	Sox2ot
2	158604550	158620150	15600	28181.9	103	1	22348	Slc32a1
2	73261800	73282950	21150	28088.8	104	1	381373	Sp9
1	138832050	138850750	18700	28062.9	105	1	16876	Lhx9
9	24765450	24783600	18150	28051.8	106	1	57246	Tbx20
2	26192900	26209100	16200	28034.7	107	1	227638	Qsox2
15	75991150	76009450	18300	27954.5	108	1	332110	Mapk15
6	85183650	85195800	12150	27677	109	1	13796	Emx1
2	93636850	93665100	28250	27029.5	110	1	14043	Ext2
3	127625000	127645050	20050	26997.1	111	1	11924	Neurog2
7	139575450	139590950	15500	26709.9	112	0	212111	Inpp5a
11	21991500	22009150	17650	26695.8	113	0	216565	Ehbp1
7	70321000	70351100	30100	26689.6	114	0	624549	Gm29683
19	16867750	16879850	12100	26554.8	115	0	14240	Foxb2
13	71954850	71971450	16600	26543.5	116	0	16371	Irx1
7	45161700	45192550	30850	26466.3	117	0	72961	Slc17a7
12	73033500	73056450	22950	26417.9	118	0	20471	Six1
14	48651050	48676650	25600	26377	119	0	606497	Otx2os1
13	56245700	56265450	19750	26198.7	120	0	18014	Neurog1
5	28453550	28475250	21700	26169.4	121	0	654796	9530036O11Rik
1	4489800	4502950	13150	26028.7	122	0	20671	Sox17
5	67213850	67235800	21950	26010.5	123	0	67878	Tmem33
8	70483800	70511100	27300	25787.6	124	0	75620	Kxd1
18	11046000	11060550	14550	25784.1	125	0	68434	Gata6os
4	46337050	46352650	15600	25783.4	126	0	110805	Foxe1
4	125480000	125502400	22400	25745.5	127	0	14807	Grik3
14	67226150	67241900	15750	25486.4	128	0	13592	Ebf2
10	80339750	80361600	21850	25452.3	129	0	66548	Adamtsl5
9	118468000	118491300	23300	25375.8	130	0	13813	Eomes
13	112985550	113002100	16550	25156.1	131	0	622408	Mcidas
9	55538450	55550650	12200	25131.7	132	0	244891	Scaper
2	38694150	38714650	20500	24978.9	133	0	26423	Nr5a1
2	160357050	160373350	16300	24644.5	134	0	16658	Mafb
6	30167000	30183250	16250	24562.4	135	0	723886	Mir96
6	23242200	23262300	20100	24544.7	136	0	73191	Fezf1
1	63244600	63274750	30150	24512.6	137	0	73884	Zdbf2
14	104457600	104476550	18950	24388.9	138	0	18996	Pou4f1
19	25599350	25617800	18450	24294.4	139	0	50796	Dmrt1
15	35291250	35305450	14200	24290	140	0	107587	Osr2
12	9567450	9586100	18650	24280.6	141	0	69420	1700022H16Rik
13	53459750	53478100	18350	23894.9	142	0	17702	Msx2
16	17795300	17814250	18950	23704.6	143	0	224024	Scarf2
7	137307700	137325700	18000	23610.9	144	0	13593	Ebf3
2	70559100	70573250	14150	23423.1	145	0	68986	Gad1os
19	45733300	45749850	16550	23222.2	146	0	18150	Npm3
18	42390850	42404650	13800	22902.3	147	0	18998	Pou4f3
2	122293500	122304150	10650	22870.8	148	0	66811	Duoxa2
8	92351900	92369550	17650	22846.7	149	0	71296	Crnde
13	36721600	36737400	15800	22792.3	150	0	69955	Fars2
7	49904450	49919350	14900	22787.7	151	0	104245	Slc6a5
13	83711850	83735200	23350	22513.7	152	0	320203	Mir9-2hg
9	58194350	58206250	11900	22383.6	153	0	665268	1600029O15Rik
19	59160250	59174900	14650	22249.3	154	0	22326	Vax1
8	91795650	91811800	16150	22118.6	155	0	16373	Irx3
12	56606650	56619150	12500	22089.7	156	0	18094	Nkx2-9
17	8426650	8441100	14450	21860.9	157	0	20997	T
9	40870850	40883600	12750	21819.1	158	0	244813	Bsx
19	25663700	25678750	15050	21605.2	159	0	226049	Dmrt2
12	118835600	118857200	21600	21469.7	160	0	320145	Sp8
1	136943100	136960850	17750	21372.1	161	0	26424	Nr5a2
2	61801700	61815400	13700	21103.4	162	0	21375	Tbr1
14	118222700	118241650	18950	21098.7	163	0	223227	Sox21
5	147181650	147195250	13600	21070.7	164	0	14842	Gsx1
1	74944850	74954500	9650	20898	165	0	16147	Ihh
18	65932250	65943600	11350	20799.3	166	0	19434	Rax
2	146828900	146843700	14800	20675.1	167	0	228730	Kiz
4	154631050	154644800	13750	20638.1	168	0	70673	Prdm16
13	40700650	40720250	19600	20556.6	169	0	21418	Tfap2a
5	67090250	67105350	15100	20497.1	170	0	18935	Phox2b
4	9841200	9861850	20650	20386.5	171	0	242316	Gdf6
3	66969100	66984450	15350	20261.8	172	0	66880	Rsrc1
14	32455600	32469700	14100	20044.4	173	0	20508	Slc18a3
7	49628800	49641900	13100	19970.6	174	0	13172	Dbx1
2	18686350	18702800	16450	19819.6	175	0	381350	Spag6
13	31797350	31817150	19800	19673.2	176	0	17300	Foxc1
9	87727000	87742200	15200	19625.2	177	0	76365	Tbx18
8	70369650	70390250	20600	19162.4	178	0	382056	Crtc1
3	87989550	88005250	15700	19093	179	0	12032	Bcan
10	22148200	22160750	12550	19039.6	180	0	667281	H60b
3	154324250	154338250	14000	19012.7	181	0	99686	AI606473
2	172543000	172555100	12100	18899.1	182	0	21420	Tfap2c
4	126728550	126739800	11250	18835.8	183	0	332937	Tfap2e
4	152270900	152298450	27550	18805.8	184	0	70025	Acot7
12	8296300	8304550	8250	18628.5	185	0	238057	Gdf7
1	187603750	187613100	9350	18558.7	186	0	26381	Esrrg
13	78170750	78197950	27200	18536.6	187	0	13865	Nr2f1
12	110274300	110285600	11300	18522.2	188	0	353504	Dio3os
1	167685650	167697200	11550	18460.6	189	0	110648	Lmx1a
15	99578900	99596950	18050	18428.6	190	0	11830	Aqp5
10	84751400	84761800	10400	18206.7	191	0	71137	Rfx4
15	99082000	99102050	20050	18107.4	192	0	78733	Troap
11	75161950	75174400	12450	18016.9	193	0	387208	Mir212
19	44666850	44687400	20550	17993.5	194	0	102465114	Mir3084-2
15	98769600	98782800	13200	17986.9	195	0	22410	Wnt10b
12	84566600	84573950	7350	17430.7	196	0	12677	Vsx2
18	80979900	80992800	12900	17270.1	197	0	20689	Sall3
13	116292050	116307550	15500	17247.2	198	0	16392	Isl1
12	111266600	111278100	11500	17189.4	199	0	93835	Amn
5	28116200	28129350	13150	17170.5	200	0	13799	En2
14	70073750	70084750	11000	17104.6	201	0	13655	Egr3
12	72936400	72948250	11850	17080.9	202	0	75801	4930447C04Rik
18	80702950	80718800	15850	16914.9	203	0	18018	Nfatc1
13	94700450	94711250	10800	16821	204	0	21371	Tbca
X	58012650	58035200	22550	16802.8	205	0	22773	Zic3
12	104464750	104479150	14400	16703.5	206	0	14836	Gsc
14	69167950	69178400	10450	16648.7	207	0	73554	1700092C10Rik
19	24896200	24905250	9050	16437.9	208	0	14237	Foxd4
9	122566650	122574150	7500	16386.4	209	0	319626	9530059O14Rik
5	139904500	139916300	11800	16328.7	210	0	243312	Elfn1
14	63939200	63950250	11050	16293.7	211	0	20680	Sox7
10	22811250	22824700	13450	16256.3	212	0	21412	Tcf21
1	13122500	13130100	7600	16222.3	213	0	383491	Prdm14
11	68382900	68403950	21050	16214	214	0	18208	Ntn1
2	25575400	25585850	10450	16198.3	215	0	381353	Ajm1
11	83849100	83857800	8700	16177	216	0	21410	Hnf1b
15	98890350	98900050	9700	15996.8	217	0	69159	Rhebl1
5	75142400	75157500	15100	15833.7	218	0	18595	Pdgfra
11	95823650	95837750	14100	15815.7	219	0	66610	Abi3
11	12017750	12044100	26350	15792.9	220	0	14783	Grb10
8	120879650	120899800	20150	15766.7	221	0	108148	Galnt2
4	152148350	152163700	15350	15695.9	222	0	56226	Espn
15	76508850	76525200	16350	15666.3	223	0	170729	Scrt1
2	130573350	130584450	11100	15615.2	224	0	18429	Oxt
11	115313950	115324950	11000	15602.4	225	0	237987	Otop2
7	140041400	140053600	12200	15595.2	226	0	17703	Msx3
2	70469150	70479450	10300	15541.5	227	0	64406	Sp5
15	7808900	7820250	11350	15502.4	228	0	14573	Gdnf
10	52019750	52033250	13500	15458.8	229	0	215031	Vgll2
1	120336000	120344700	8700	15442.5	230	0	226359	C1ql2
16	18614050	18629950	15900	15399.8	231	0	18951	Septin5
15	99219350	99231100	11750	15366.4	232	0	16512	Kcnh3
10	67532850	67541950	9100	15303	233	0	13654	Egr2
5	108363100	108371250	8150	15246.7	234	0	77560	9330198I05Rik
15	85572750	85586850	14100	15223.9	235	0	22422	Wnt7b
6	8946800	8959450	12650	15209.5	236	0	18231	Nxph1
7	70279050	70293150	14100	15145.9	237	0	624549	Gm29683
12	33953450	33971050	17600	15097.2	238	0	22160	Twist1
11	119544350	119554850	10500	15031.7	239	0	18164	Nptx1
5	98165500	98176350	10850	14894.5	240	0	77630	Prdm8
12	49372050	49387250	15200	14827.9	241	0	67293	3110039M20Rik
6	64726550	64738650	12100	14790.1	242	0	11921	Atoh1
2	98662200	98663000	800	14754.8	243	0	241568	Lrrc4c
8	84698800	84722350	23550	14710.8	244	0	212528	Trmt1
3	17784700	17797550	12850	14616.8	245	0	723950	Mir124a-2
19	46306650	46327400	20750	14545.7	246	0	73728	Psd
1	190167400	190178800	11400	14507.7	247	0	19130	Prox1
2	146217100	146228800	11700	14457.2	248	0	53626	Insm1
7	27354750	27374950	20200	14443	249	0	80297	Sptbn4
6	84578850	84592650	13800	14156.5	250	0	232174	Cyp26b1
8	87465000	87475050	10050	14154.6	251	0	12404	Cbln1
15	74510650	74522250	11600	14071.7	252	0	107831	Adgrb1
5	147717750	147729850	12100	14034	253	0	14254	Flt1
7	30451300	30468800	17500	13952.4	254	0	54631	Nphs1
14	32592900	32604450	11550	13939.3	255	0	107751	Drgx
11	119077400	119092650	15250	13913.2	256	0	12418	Cbx4
10	127074650	127092600	17950	13900.1	257	0	216439	Agap2
11	59282850	59294300	11450	13890.1	258	0	22416	Wnt3a
5	24520900	24530550	9650	13747.7	259	0	231044	Gbx1
15	102741600	102749700	8100	13710.3	260	0	67488	Calcoco1
14	34815800	34825400	9600	13698.2	261	0	14803	Grid1
11	101159100	101180050	20950	13697.2	262	0	53321	Cntnap1
2	22616350	22628150	11800	13685.4	263	0	667663	Myo3a
11	4733700	4752550	18850	13531.4	264	0	67178	Zmat5
7	98831000	98841700	10700	13523.6	265	0	22411	Wnt11
9	37451400	37464550	13150	13389.8	266	0	19649	Robo3
11	5055350	5066700	11350	13268.5	267	0	78926	Gas2l1
8	70081800	70092500	10700	13222.1	268	0	330790	Hapln4
18	35647200	35658250	11050	13105.1	269	0	71242	Spata24
13	98496150	98508550	12400	13088.8	270	0	70090	2310005E17Rik
11	97528150	97539300	11150	13078.9	271	0	56013	Srcin1
7	142653550	142669050	15500	12955	272	0	723874	Mir483
5	36861850	36873400	11550	12954.9	273	0	269643	Ppp2r2c
14	64582800	64594600	11800	12857	274	0	387233	Mir124a-1
14	79767100	79776300	9200	12834.7	275	0	18530	Pcdh8
8	46287450	46298450	11000	12778.2	276	0	234219	Helt
4	154134150	154144450	10300	12725.4	277	0	59002	Wrap73
10	127164700	127181700	17000	12558.1	278	0	216441	Slc26a10
11	44610000	44623300	13300	12469.7	279	0	13591	Ebf1
2	180886600	180897750	11150	12434.5	280	0	723951	Mir124a-3
11	97012200	97023450	11250	12361.6	281	0	83395	Sp6
9	32537200	32550950	13750	12274.5	282	0	14247	Fli1
4	11383900	11391500	7600	12161.5	283	0	207920	Esrp1
19	44508550	44519800	11250	12145.8	284	0	240667	Sec31b
19	37432150	37438450	6300	12099.9	285	0	15242	Hhex
5	143251200	143260500	9300	12038	286	0	54201	Zfp316
4	138389250	138399600	10350	11986.3	287	0	625638	Fam43b
11	102142250	102150050	7800	11970.7	288	0	217214	Nags
4	148159450	148168900	9450	11944.2	289	0	230904	Fbxo2
7	144834300	144845000	10700	11863.9	290	0	14174	Fgf3
7	132595550	132603600	8050	11858.2	291	0	20231	Nkx1-2
14	21982000	21997250	15250	11778.3	292	0	218820	Zfp503
2	180774200	180781800	7600	11763.1	293	0	140489	Bhlhe23
1	119415700	119427900	12200	11688.4	294	0	16324	Inhbb
3	83124750	83131500	6750	11564.9	295	0	100534287	Dchs2
19	44830850	44841650	10800	11529.2	296	0	73322	1700039E22Rik
4	124652900	124668450	15550	11524.5	297	0	18991	Pou3f1
10	62126050	62137250	11200	11463.5	298	0	69894	Fam241b
18	6999650	7007000	7350	11429.2	299	0	210719	Mkx
4	152311050	152319600	8550	11398.8	300	0	433809	Rnf207
8	12424100	12435850	11750	11360.9	301	0	434280	Sox1ot
4	140238950	140250550	11600	11340.8	302	0	230868	Igsf21
19	59187750	59199250	11500	11334.2	303	0	102465114	Mir3084-2
9	57497200	57507800	10600	11326.6	304	0	102614	Rpp25
17	23737250	23754400	17150	11309.6	305	0	76498	Paqr4
17	34669050	34674350	5300	11239.5	306	0	81877	Tnxb
4	124980050	124992500	12450	11224.6	307	0	192199	Rspo1
11	95116450	95127300	10850	11216.4	308	0	13393	Dlx3
2	94238150	94249050	10900	11149.7	309	0	723953	Mir129-2
X	137096000	137107150	11150	11097.2	310	0	13984	Esx1
5	118167450	118176700	9250	11079.5	311	0	12123	Hrk
3	107452500	107463450	10950	11048	312	0	99738	Kcnc4
13	31553600	31563550	9950	11020.7	313	0	15220	Foxq1
7	139941450	139947500	6050	11014.8	314	0	76484	Kndc1
19	5554800	5573050	18250	10970.1	315	0	381201	Ap5b1
7	144859250	144865900	6650	10913.7	316	0	14175	Fgf4
9	31910650	31918100	7450	10906.9	317	0	12023	Barx2
7	101816550	101824100	7550	10886.7	318	0	16332	Inppl1
15	82204650	82217400	12750	10885.3	319	0	435145	Shisa8
7	45404550	45420450	15900	10871.5	320	0	78405	Ntf5
17	87792500	87801100	8600	10806.9	321	0	210741	Kcnk12
10	87484350	87495550	11200	10778.9	322	0	17172	Ascl1
10	81451950	81469700	17750	10741.6	323	0	319586	Celf5
2	25286300	25294900	8600	10728	324	0	78217	Tmem210
7	19518050	19532700	14650	10657.1	325	0	69547	Nkpd1
5	35276100	35286600	10500	10657.1	326	0	11553	Adra2c
17	8796450	8805500	9050	10635	327	0	23984	Pde10a
4	48044150	48053500	9350	10609.8	328	0	18124	Nr4a3
1	19097850	19113550	15700	10562	329	0	226896	Tfap2d
2	165228200	165243900	15700	10533.2	330	0	104010	Cdh22
12	117150400	117156700	6300	10450.8	331	0	19276	Ptprn2
7	63751900	63760250	8350	10383.4	332	0	170711	Otud7a
12	99963700	99970200	6500	10376.8	333	0	217826	Kcnk13
9	37426600	37437650	11050	10372.5	334	0	19649	Robo3
11	63916300	63927700	11400	10304.7	335	0	54710	Hs3st3b1
7	110624850	110632200	7350	10303.7	336	0	11535	Adm
10	103026200	103036800	10600	10259.7	337	0	216285	Alx1
5	30097400	30118600	21200	10227.7	338	0	97212	Hadha
4	134243500	134254750	11250	10192.2	339	0	77490	Zfp593os
2	170492550	170501000	8450	10179.8	340	0	13081	Cyp24a1
6	85508600	85517750	9150	10171.3	341	0	13656	Egr4
2	24471950	24477250	5300	10098.2	342	0	18510	Pax8
8	14093050	14101650	8600	10091.1	343	0	244310	Dlgap2
17	93198800	93205750	6950	9901.14	344	0	11516	Adcyap1
11	82384550	82393250	8700	9874.86	345	0	270893	Tmem132e
7	27325300	27339850	14550	9862.99	346	0	108075	Ltbp4
2	164398800	164409300	10500	9823.64	347	0	19668	Rbpjl
17	48091700	48100250	8550	9789.27	348	0	68224	1700067P10Rik
8	92672900	92681050	8150	9751.64	349	0	64379	Irx6
8	89039450	89047650	8200	9709.47	350	0	58198	Sall1
3	18049650	18056800	7150	9703.78	351	0	59058	Bhlhe22
5	31135400	31142300	6900	9672.4	352	0	58522	Trim54
18	82402800	82409100	6300	9671.83	353	0	14427	Galr1
3	30503950	30516200	12250	9648.11	354	0	14013	Mecom
5	128594050	128605250	11200	9639	355	0	93897	Fzd10
7	116029100	116042050	12950	9621.23	356	0	68469	Sox6os
11	103354800	103368050	13250	9564.13	357	0	544817	Arhgap27
7	51621150	51628800	7650	9520.57	358	0	140919	Slc17a6
4	131913000	131923500	10500	9384.85	359	0	623230	Tmem200b
10	19846650	19853450	6800	9311.02	360	0	76157	Slc35d3
14	66633800	66643400	9600	9303.85	361	0	11549	Adra1a
16	3231550	3241750	10200	9225.48	362	0	258859	Or1f19
2	19428400	19433900	5500	9172.32	363	0	102637107	Ptf1aos
17	79709400	79716550	7150	9153.63	364	0	13078	Cyp1b1
4	109654700	109661850	7150	9153.05	365	0	12580	Cdkn2c
19	6921700	6928900	7200	9083.3	366	0	67077	Catsperz
14	61680050	61691950	11900	9076.71	367	0	668253	Dleu2
11	116279600	116286950	7350	9062.77	368	0	14428	Galr2
5	138990250	139000800	10550	9026.3	369	0	18590	Pdgfa
3	107577650	107587800	10150	9022.31	370	0	11694	Alx3
11	6060550	6073100	12550	8941.56	371	0	12323	Camk2b
12	112139400	112159600	20200	8935.31	372	0	668303	Kif26a
3	86545950	86552700	6750	8934.78	373	0	80877	Lrba
11	118903100	118911900	8800	8934.76	374	0	52897	Rbfox3
15	79501750	79519600	17850	8931.3	375	0	16520	Kcnj4
2	33576650	33590050	13400	8885.19	376	0	16917	Lmx1b
1	74848950	74861400	12450	8881.18	377	0	12570	Cdk5r2
15	72543200	72550800	7600	8854.22	378	0	223604	Kcnk9
11	103646100	103656250	10150	8765.84	379	0	104582	Rprml
5	28202900	28213400	10500	8734.67	380	0	269637	Cnpy1
2	180330600	180338600	8000	8724.86	381	0	14464	Gata5
19	6494100	6506700	12600	8717.85	382	0	18190	Nrxn2
2	29245050	29258000	12950	8695.63	383	0	76220	6530402F18Rik
17	27508900	27520350	11450	8691.35	384	0	268934	Grm4
8	70107000	70125750	18750	8615.68	385	0	13004	Ncan
11	50847050	50853650	6600	8609.99	386	0	108072	Grm6
7	142079250	142098550	19300	8599.06	387	0	18218	Dusp8
12	86417800	86427500	9700	8543.37	388	0	26380	Esrrb
9	89905700	89915750	10050	8533.86	389	0	19417	Rasgrf1
6	70952900	70959150	6250	8532.19	390	0	232077	Foxi3
14	58068400	58078800	10400	8519.93	391	0	14180	Fgf9
1	135914700	135924750	10050	8493.97	392	0	18772	Pkp1
2	144327400	144333750	6350	8491.83	393	0	107586	Ovol2
2	127358400	127367850	9450	8473.75	394	0	11552	Adra2b
1	74767300	74776900	9600	8464.44	395	0	22420	Wnt6
5	125527800	125537500	9700	8459.09	396	0	208151	Tmem132b
2	172727650	172744250	16600	8442.95	397	0	12162	Bmp7
2	79453800	79461100	7300	8424.13	398	0	228094	Cerkl
11	115246050	115256750	10700	8421.27	399	0	320534	Tmem104
2	118892950	118902000	9050	8420.54	400	0	228536	Bahd1
16	20588450	20599050	10600	8396.59	401	0	328643	Vwa5b2
3	88019900	88026550	6650	8394.97	402	0	73940	Hapln2
7	142964150	142973000	8850	8338.98	403	0	17173	Ascl2
3	55777350	55788450	11100	8337.92	404	0	26422	Nbea
18	38207650	38215300	7650	8331.59	405	0	75599	Pcdh1
2	10367800	10376650	8850	8326.75	406	0	353282	Sfmbt2
6	38351400	38358150	6750	8304.18	407	0	78781	Zc3hav1
18	61032000	61051150	19150	8249.09	408	0	18596	Pdgfrb
4	41495900	41503900	8000	8240.63	409	0	329828	Myorg
4	120261850	120272700	10850	8197.58	410	0	329934	Foxo6
12	110184700	110189900	5200	8190.77	411	0	67280	3110009F21Rik
5	37886250	37904400	18150	8186.25	412	0	102637176	Gm20052
1	127673500	127682800	9300	8171.96	413	0	72160	Tmem163
6	87728000	87737000	9000	8158.88	414	0	58229	Efcc1
5	33685000	33708450	23450	8134.45	415	0	21335	Tacc3
11	95577300	95590200	12900	8099.74	416	0	18053	Ngfr
3	96327650	96338600	10950	8057	417	0	100504145	Platr30
3	102007200	102013900	6700	7977.52	418	0	18072	Nhlh2
9	21986200	21994050	7850	7964.41	419	0	77609	Odad3
11	116105550	116111350	5800	7954.65	420	0	217333	Trim47
15	95648000	95656000	8000	7941.68	421	0	223843	Dbx2
15	11033950	11039350	5400	7901.28	422	0	239336	Rxfp3
19	54042100	54051100	9000	7866.87	423	0	11551	Adra2a
X	60887550	60899450	11900	7834.2	424	0	20675	Sox3
3	131104050	131113750	9700	7831.69	425	0	16842	Lef1
11	59132050	59142250	10200	7828.5	426	0	380698	Obscn
11	82927400	82938350	10950	7813.37	427	0	217012	Unc45b
6	52004850	52014550	9700	7804.68	428	0	54353	Skap2
15	76224850	76235800	10950	7801.58	429	0	671535	Parp10
11	116529700	116537600	7900	7786.11	430	0	20698	Sphk1
2	181667750	181675950	8200	7777.07	431	0	20672	Sox18
11	118566100	118574600	8500	7773.77	432	0	52897	Rbfox3
4	153474550	153487150	12600	7736.86	433	0	230959	Ajap1
4	136243350	136250950	7600	7721.02	434	0	230837	Asap3
2	57098750	57106550	7800	7710.56	435	0	18227	Nr4a2
11	95912850	95918950	6100	7691.16	436	0	14422	B4galnt2
15	64917800	64925850	8050	7690.34	437	0	11514	Adcy8
2	74645100	74651600	6500	7690.26	438	0	14029	Evx2
2	36197900	36214500	16600	7617.78	439	0	67871	Mrrf
16	17911750	17918000	6250	7611.04	440	0	195333	Gsc2
15	89370050	89379950	9900	7570.59	441	0	72962	Tymp
1	163306650	163317750	11100	7561.46	442	0	18933	Prrx1
6	29525850	29531600	5750	7511.09	443	0	27056	Irf5
X	71660200	71668600	8400	7504.86	444	0	14765	Gpr50
7	130932300	130940250	7950	7474.85	445	0	56213	Htra1
12	58210150	58215900	5750	7473.73	446	0	20605	Sstr1
2	150687600	150693850	6250	7465.75	447	0	114889	Vsx1
5	33531450	33548850	17400	7464.66	448	0	74504	Fam53a
11	66522200	66529300	7100	7415.17	449	0	380702	Shisa6
9	37526200	37532550	6350	7406.34	450	0	69524	Esam
10	60683900	60690550	6650	7403.08	451	0	22295	Cdh23
19	42194850	42205150	10300	7393.95	452	0	54612	Sfrp5
17	86752100	86757050	4950	7379.82	453	0	13819	Epas1
11	59174200	59180000	5800	7326.54	454	0	118454	Gjc2
4	41722500	41731900	9400	7325.62	455	0	550619	Arid3c
5	38273250	38278750	5500	7310.66	456	0	21906	Otop1
4	150026850	150036400	9550	7276.66	457	0	100198	H6pd
4	148803000	148817300	14300	7274.38	458	0	69743	Casz1
8	104537300	104544950	7650	7271.02	459	0	12354	Car7
4	120739500	120752000	12500	7214.82	460	0	60613	Kcnq4
11	120656200	120663250	7050	7209.59	461	0	77583	Notum
10	127046450	127052750	6300	7203.3	462	0	13115	Cyp27b1
1	121171550	121185550	14000	7196.76	463	0	98452	Celrr
6	112486350	112493500	7150	7190.8	464	0	18430	Oxtr
5	112571550	112584800	13250	7162.53	465	0	67325	1700034G24Rik
11	102942150	102951200	9050	7138.74	466	0	23829	C1ql1
2	84865450	84877850	12400	7135.31	467	0	269295	Rtn4rl2
4	141238050	141250100	12050	7113.14	468	0	213649	Arhgef19
2	174282250	174290350	8100	7108.06	469	0	56802	Gnasas1
13	3357400	3361950	4550	7098.46	470	0	76937	2810429I04Rik
15	31364750	31370100	5350	7095.8	471	0	67434	Ankrd33b
4	155647850	155660750	12900	7090.79	472	0	76580	Mib2
9	21160250	21169700	9450	7079.52	473	0	18577	Pde4a
13	98569200	98578050	8850	7078.55	474	0	68344	Tmem174
3	103572300	103578250	5950	7076.55	475	0	54524	Syt6
12	20226400	20234700	8300	7067.39	476	0	69513	1700030C10Rik
8	75208900	75219800	10900	7064.74	477	0	75141	Rasd2
6	49819500	49825600	6100	7050.9	478	0	109648	Npy
16	18774050	18780350	6300	7043.11	479	0	12741	Cldn5
15	11901750	11908950	7200	7023.42	480	0	381002	Gm5144
5	98251600	98257100	5500	6991.59	481	0	14176	Fgf5
1	134643250	134652950	9700	6958.03	482	0	20980	Syt2
6	91405900	91414700	8800	6937.27	483	0	22421	Wnt7a
13	98349350	98355400	6050	6929.59	484	0	15229	Foxd1
16	92692500	92701350	8850	6923	485	0	12394	Runx1
4	107430950	107441750	10800	6913.44	486	0	230587	Glis1
7	140919200	140929800	10600	6909.6	487	0	101613	Nlrp6
7	40895700	40904500	8800	6859.75	488	0	58188	Vstm2b
11	18869150	18877750	8600	6857.41	489	0	17268	Meis1
10	81238800	81263300	24500	6854.88	490	0	17179	Matk
10	80928600	80941400	12800	6854.01	491	0	17873	Gadd45b
8	108692750	108700850	8100	6851.56	492	0	11906	Zfhx3
11	84956000	84961150	5150	6838.91	493	0	12351	Car4
9	45428600	45433050	4450	6775.18	494	0	74602	4833428L15Rik
12	55595600	55602350	6750	6757.46	495	0	56856	Insm2
7	46392450	46400650	8200	6749.22	496	0	16502	Kcnc1
5	73646450	73654550	8100	6745.94	497	0	73472	Spata18
17	32388300	32399650	11350	6742.09	498	0	320484	Rasal3
6	67530900	67538000	7100	6725.46	499	0	56753	Tacstd2
6	127764650	127771700	7050	6719.08	500	0	381813	Prmt8
11	104129550	104137700	8150	6693.64	501	0	12921	Crhr1
7	123979450	123988500	9050	6656.57	502	0	628779	Hs3st4
11	115855950	115862450	6500	6646.07	503	0	217325	Llgl2
5	134983250	134991350	8100	6644.04	504	0	71304	Wbscr25
7	28288650	28304650	16000	6631.93	505	0	280621	Selenov
1	62701650	62708800	7150	6596.03	506	0	18187	Nrp2
5	143367400	143375950	8550	6595.85	507	0	170935	Grid2ip
5	135849500	135859100	9600	6571.13	508	0	58212	Srrm3
1	78137900	78149400	11500	6567.95	509	0	18505	Pax3
17	83626000	83633350	7350	6550.93	510	0	225030	Kcng3
1	85590000	85593550	3550	6550.64	511	0	109032	Sp110
7	25176000	25182800	6800	6549.43	512	0	18987	Pou2f2
13	30747200	30753650	6450	6535.06	513	0	16364	Irf4
11	87759650	87766950	7300	6528.01	514	0	207777	Tspoap1
8	124789450	124798900	9450	6519.57	515	0	330863	Trim67
14	70886250	70894200	7950	6516.27	516	0	14586	Gfra2
9	56793800	56798650	4850	6489.75	517	0	235402	Lingo1
7	49972300	49980750	8450	6485.81	518	0	338352	Nell1
3	90461750	90467200	5450	6464.25	519	0	18160	Npr1
19	46131550	46137900	6350	6462.59	520	0	18742	Pitx3
16	9990250	9997500	7250	6459.15	521	0	14811	Grin2a
9	3050400	3065450	15050	6428.49	522	0	100628572	Mir101c
9	78438600	78449000	10400	6418.92	523	0	68291	Mto1
12	76402950	76407900	4950	6418.53	524	0	15512	Hspa2
13	56291950	56297850	5900	6395.75	525	0	57266	Cxcl14
9	123460850	123462400	1550	6375.69	526	0	102436	Lars2
8	106133250	106140150	6900	6374.72	527	0	77411	Esrp2
7	16471400	16478700	7300	6367.45	528	0	18142	Npas1
8	27222100	27230950	8850	6365.56	529	0	76615	Got1l1
19	56719300	56727450	8150	6360.82	530	0	11554	Adrb1
13	116704650	116712700	8050	6352.4	531	0	74680	4930435F18Rik
19	44719050	44728150	9100	6326.54	532	0	102465114	Mir3084-2
4	46988800	46994900	6100	6319.88	533	0	242425	Gabbr2
17	29882950	29891750	8800	6318.32	534	0	74762	Mdga1
9	71213350	71218350	5000	6292.7	535	0	19378	Aldh1a2
17	44732450	44740250	7800	6254.69	536	0	12393	Runx2
16	17830350	17838800	8450	6253.94	537	0	80733	Car15
14	122444650	122456300	11650	6242.87	538	0	328479	Gm5089
7	78573650	78581850	8200	6238.33	539	0	414121	E430016F16Rik
13	54943450	54958400	14950	6229.85	540	0	107448	Unc5a
2	164165800	164172600	6800	6214.39	541	0	16538	Kcns1
9	48831250	48839350	8100	6204.35	542	0	235320	Zbtb16
17	24749750	24756750	7000	6203.16	543	0	328779	Hs3st6
8	84008200	84015250	7050	6202.96	544	0	70134	Misp3
9	121492200	121500050	7850	6195.25	545	0	12424	Cck
11	50598450	50606600	8150	6189.44	546	0	216725	Adamts2
14	46383600	46394150	10550	6184.44	547	0	12159	Bmp4
8	125908000	125914400	6400	6183.93	548	0	234878	Map3k21
18	74439050	74447650	8600	6177.55	549	0	17919	Myo5b
1	156202650	156207550	4900	6172.69	550	0	329274	Fam163a
17	15372050	15382250	10200	6168.03	551	0	13388	Dll1
17	74046250	74052550	6300	6150.92	552	0	94224	Srd5a2
15	37229450	37235750	6300	6150.65	553	0	252973	Grhl2
7	98188550	98196350	7800	6149.99	554	0	272411	B3gnt6
11	101075750	101084450	8700	6140.8	555	0	71743	Coasy
11	49608100	49619300	11200	6133.07	556	0	14257	Flt4
16	5129150	5137600	8450	6119.22	557	0	19041	Ppl
11	19007100	19017250	10150	6101.37	558	0	17268	Meis1
15	99052650	99060550	7900	6087.98	559	0	19132	Prph
2	118672050	118680400	8350	6086.28	560	0	214230	Pak6
1	64733950	64739750	5800	6083.83	561	0	14367	Fzd5
3	104958450	104967250	8800	6082.65	562	0	22414	Wnt2b
7	121390750	121395450	4700	6071.06	563	0	195646	Hs3st2
3	5860250	5860850	600	6064.69	564	0	19302	Pex2
9	111308500	111314700	6200	6057.32	565	0	320429	Trank1
8	123889850	123896700	6850	6052.68	566	0	11459	Acta1
5	93041600	93047300	5700	6051.73	567	0	78088	Sowahb
12	112871800	112880250	8450	6051.3	568	0	56696	Gpr132
1	5017550	5025600	8050	6048.06	569	0	58175	Rgs20
10	7387750	7395050	7300	6020.84	570	0	77777	Ulbp1
1	191180900	191187800	6900	6009.8	571	0	11910	Atf3
10	44002950	44007150	4200	5996.94	572	0	11630	Crybg1
5	118024800	118029800	5000	5995.8	573	0	57816	Tesc
9	120299850	120308850	9000	5965.39	574	0	245049	Myrip
8	11474200	11482850	8650	5963.06	575	0	19332	Rab20
13	56750450	56754450	4000	5940.53	576	0	17129	Smad5
11	114784600	114797150	12550	5939.33	577	0	72014	Btbd17
17	3005500	3021150	15650	5937.53	578	0	328734	Pisd-ps2
16	11982750	11989150	6400	5924.84	579	0	72555	Shisa9
5	106558750	106567450	8700	5922.47	580	0	52397	Zfp644
8	25033600	25040800	7200	5919.82	581	0	83436	Plekha2
9	45132900	45146900	14000	5918.87	582	0	399548	Scn4b
5	130447300	130452050	4750	5910.46	583	0	140904	Caln1
2	116058650	116068500	9850	5903.28	584	0	17536	Meis2
14	84442500	84449300	6800	5898.55	585	0	219228	Pcdh17
7	141290350	141298400	8050	5890.23	586	0	54006	Deaf1
3	89316000	89323800	7800	5889.72	587	0	13638	Efna3
11	77930350	77935400	5050	5885.05	588	0	20370	Sez6
5	67605450	67611550	6100	5882.13	589	0	330096	Shisa3
15	80010600	80018700	8100	5873.48	590	0	18591	Pdgfb
11	101961600	101970150	8550	5863.22	591	0	74499	Sost
5	137024900	137033600	8700	5862.54	592	0	381677	Vgf
12	31557900	31561700	3800	5852.17	593	0	23985	Slc26a4
18	67130100	67136500	6400	5850.31	594	0	14680	Gnal
4	155032350	155048750	16400	5848.95	595	0	269615	Plch2
9	21241350	21246000	4650	5838.87	596	0	94226	S1pr5
19	58449950	58457350	7400	5836.31	597	0	14585	Gfra1
11	61016950	61029000	12050	5823.29	598	0	16515	Kcnj12
2	172932850	172942900	10050	5822.7	599	0	12162	Bmp7
2	155626400	155636100	9700	5817.14	600	0	668940	Myh7b
11	4944100	4951150	7050	5809.87	601	0	380684	Nefh
5	37239500	37247850	8350	5800.88	602	0	12933	Crmp1
6	115988400	115995500	7100	5791.39	603	0	67784	Plxnd1
11	93096850	93103200	6350	5782.18	604	0	72605	Car10
19	43383000	43390200	7200	5769.44	605	0	545291	Hpse2
2	18797500	18804150	6650	5759.4	606	0	66774	Carlr
9	102348850	102355650	6800	5753.13	607	0	270190	Ephb1
7	44584350	44595050	10700	5745.42	608	0	16541	Napsa
1	56967650	56974100	6450	5732.57	609	0	329160	9130024F11Rik
X	7918150	7929000	10850	5731.09	610	0	668963	Btbd35f20
6	55114800	55121050	6250	5728.66	611	0	12922	Crhr2
11	120527350	120533650	6300	5718.13	612	0	14527	Gcgr
7	126079850	126088250	8400	5701.48	613	0	269994	Gsg1l
5	63647500	63652400	4900	5700.73	614	0	319807	Nwd2
19	25503550	25509000	5450	5698.56	615	0	50796	Dmrt1
5	139574950	139587500	12550	5693.92	616	0	22255	Uncx
11	76669850	76675200	5350	5682.93	617	0	320522	Bhlha9
2	163850950	163861000	10050	5679.89	618	0	241770	Rims4
8	78424600	78429850	5250	5672.65	619	0	18997	Pou4f2
2	180094600	180106300	11700	5671.72	620	0	99296	Hrh3
10	79706150	79719950	13800	5660.44	621	0	15166	Hcn2
X	141721250	141727450	6200	5658.19	622	0	16370	Irs4
17	45542050	45549600	7550	5654.86	623	0	21645	Tcte1
9	108823200	108835800	12600	5649.16	624	0	107934	Celsr3
17	85798800	85804300	5500	5647.12	625	0	20472	Six2
2	127475600	127486400	10800	5643.99	626	0	56461	Kcnip3
12	84873350	84878950	5600	5643.13	627	0	16997	Ltbp2
7	141461000	141471000	10000	5639.49	628	0	213573	Cracr2b
11	103805300	103814100	8800	5639.17	629	0	22415	Wnt3
1	87260700	87269200	8500	5638.42	630	0	98363	Efhd1
7	45829250	45836200	6950	5627.22	631	0	14814	Grin2d
18	66456700	66462400	5700	5626.27	632	0	58801	Pmaip1
18	78042350	78052000	9650	5619.94	633	0	620235	Siglec15
8	122669400	122679200	9800	5618	634	0	12398	Cbfa2t3
5	117837500	117844650	7150	5589.73	635	0	18125	Nos1
2	109671950	109679000	7050	5577.43	636	0	12064	Bdnf
3	104775550	104787000	11450	5576.95	637	0	71887	Ppm1j
7	35117500	35124200	6700	5567.42	638	0	12606	Cebpa
2	119742450	119746150	3700	5567.41	639	0	228550	Itpka
18	80360450	80364850	4400	5560.66	640	0	240444	Kcng2
7	82329450	82342450	13000	5557.42	641	0	269959	Adamtsl3
4	3049950	3057100	7150	5542.81	642	0	100312470	Vmn1r2
6	114281000	114288450	7450	5519.79	643	0	232333	Slc6a1
7	34807200	34814500	7300	5514.67	644	0	68947	Chst8
6	118192200	118201450	9250	5511.21	645	0	19713	Ret
2	133549200	133556200	7000	5507.88	646	0	12156	Bmp2
13	54755150	54769250	14100	5504.41	647	0	104069	Sncb
8	22972250	22979350	7100	5490.07	648	0	11733	Ank1
3	96388300	96392900	4600	5477.23	649	0	21748	Terc
1	189784500	189800000	15500	5469.41	650	0	19250	Ptpn14
7	66424950	66429800	4850	5451.49	651	0	56847	Aldh1a3
8	47408100	47415350	7250	5445.12	652	0	71069	Stox2
8	71657650	71672250	14600	5432.5	653	0	382018	Unc13a
4	133493300	133504150	10850	5421.78	654	0	69539	Trnp1
5	33993450	34003000	9550	5414.66	655	0	269642	Nat8l
6	29167600	29179350	11750	5410.21	656	0	101359	Prrt4
6	91280400	91288700	8300	5395.32	657	0	14115	Fbln2
14	57101550	57108150	6600	5394.15	658	0	14619	Gjb2
7	79588150	79595250	7100	5381.7	659	0	56315	Rhcg
6	38632800	38641450	8650	5377.45	660	0	74253	Klrg2
8	121727700	121736850	9150	5369.89	661	0	57340	Jph3
17	56508700	56513550	4850	5354.91	662	0	20834	Znrf4
14	39470750	39476550	5800	5339.62	663	0	18183	Nrg3
7	81987950	81996550	8600	5332.94	664	0	12173	Bnc1
19	53673300	53678500	5200	5327.05	665	0	73713	Rbm20
18	15061400	15067450	6050	5325.94	666	0	106931	Kctd1
15	55305000	55310950	5950	5318.03	667	0	12818	Col14a1
7	144894200	144900650	6450	5309.29	668	0	14170	Fgf15
10	90826300	90835050	8750	5307.34	669	0	77531	Anks1b
X	37046200	37053950	7750	5306.71	670	0	245381	Sowahd
10	127323800	127328400	4600	5293.49	671	0	216445	Arhgap9
14	68080900	68085850	4950	5293.02	672	0	18040	Nefm
13	96129100	96136650	7550	5269.56	673	0	75209	Sv2c
6	126641800	126648450	6650	5259.74	674	0	16485	Kcna1
7	46374100	46379100	5000	5252.69	675	0	17927	Myod1
11	97625950	97632500	6550	5251.34	676	0	103551	Epop
12	109451850	109462500	10650	5225.79	677	0	13386	Dlk1
2	165107550	165118700	11150	5224.74	678	0	104010	Cdh22
12	102126050	102131850	5800	5222.62	679	0	238384	Slc24a4
8	27084550	27092150	7600	5214.89	680	0	78560	Adgra2
17	33977050	33981700	4650	5204.49	681	0	630499	H2-K2
9	64383050	64390300	7250	5201.92	682	0	214058	Megf11
4	139072100	139079500	7400	5199.85	683	0	15565	Htr6
4	134366350	134373300	6950	5198.27	684	0	56219	Extl1
14	29718350	29728000	9650	5195.42	685	0	12294	Cacna2d3
15	79202150	79218150	16000	5185.02	686	0	100041655	Gm10863
7	5050300	5059150	8850	5182.27	687	0	68992	Zfp580
13	23306200	23314750	8550	5175.52	688	0	75887	4930586N03Rik
1	40678050	40684500	6450	5170.65	689	0	226999	Slc9a2
1	75385750	75392150	6400	5170.29	690	0	11790	Speg
4	47203200	47210400	7200	5162.03	691	0	12819	Col15a1
4	137273950	137285000	11050	5160.76	692	0	22417	Wnt4
6	124992250	125002800	10550	5157.58	693	0	319352	Pianp
10	112268700	112273500	4800	5157.58	694	0	268345	Kcnc2
14	28503150	28512350	9200	5141.02	695	0	22418	Wnt5a
19	42426850	42437250	10400	5127.27	696	0	72832	Crtac1
7	16943450	16951700	8250	5122.11	697	0	434128	Pnma8b
16	35535950	35544900	8950	5108.23	698	0	20357	Sema5b
8	17532000	17536850	4850	5103.47	699	0	94109	Csmd1
13	38342200	38348250	6050	5095.28	700	0	12161	Bmp6
11	7054350	7069250	14900	5095.15	701	0	432530	Adcy1
2	91920300	91926500	6200	5093.79	702	0	228361	Ambra1
2	32081000	32090850	9850	5075	703	0	241303	Fam78a
4	123340100	123347400	7300	5067.32	704	0	12163	Bmp8a
15	75883350	75897500	14150	5066.54	705	0	66656	Eef1d
7	81451700	81459100	7400	5062.29	706	0	12877	Cpeb1
15	5241250	5245000	3750	5060.69	707	0	19219	Ptger4
7	112952900	112956400	3500	5058.79	708	0	78748	Rassf10
4	45823300	45831350	8050	5033.58	709	0	75426	Igfbpl1
10	81565700	81579400	13700	5003.61	710	0	21886	Tle2
16	35152500	35158350	5850	4999.43	711	0	224129	Adcy5
10	114798150	114804150	6000	4989.92	712	0	237553	Trhde
2	29843100	29849700	6600	4981.97	713	0	723904	Mir219a-2
11	104231000	104235450	4450	4975.26	714	0	17762	Mapt
13	56435100	56441250	6150	4967.54	715	0	328258	Slc25a48
17	36144350	36149300	4950	4964.11	716	0	69717	Gm10499
8	72318400	72322600	4200	4950.11	717	0	16598	Klf2
7	128413600	128421550	7950	4943.4	718	0	67865	Rgs10
15	75085450	75087050	1600	4936.81	719	0	100041546	Ly6c2
13	84343100	84350400	7300	4933.36	720	0	72745	Tmem161b
1	91341550	91347650	6100	4928.64	721	0	227357	Espnl
X	57915600	57924200	8600	4917.7	722	0	22773	Zic3
8	84040200	84046150	5950	4915.03	723	0	50931	Il27ra
19	48203850	48210250	6400	4913.2	724	0	66673	Sorcs3
19	7155500	7172150	16650	4901.1	725	0	107227	Macrod1
17	12505000	12510250	5250	4897.79	726	0	20519	Slc22a3
15	98165650	98171700	6050	4887.73	727	0	239650	Ccdc184
11	11113400	11118350	4950	4887.29	728	0	319922	Vwc2
18	86709600	86716000	6400	4886.63	729	0	12405	Cbln2
7	44333250	44340850	7600	4886.32	730	0	243961	Shank1
5	140603500	140613500	10000	4870.21	731	0	16848	Lfng
7	131963850	131969050	5200	4865.63	732	0	233919	Gpr26
5	101520150	101531450	11300	4853.77	733	0	18096	Nkx6-1
7	30632350	30636900	4550	4852.04	734	0	14008	Etv2
6	53815700	53821900	6200	4850.17	735	0	66873	Tril
18	24650650	24655600	4950	4847.89	736	0	68591	Mocos
19	45294500	45308800	14300	4845.24	737	0	102465114	Mir3084-2
2	18606900	18610150	3250	4843.03	738	0	12238	Commd3
7	138938600	138944900	6300	4837.37	739	0	74004	Jakmip3
13	34649500	34654550	5050	4836.97	740	0	66895	Pxdc1
8	122278550	122287000	8450	4823.87	741	0	22761	Zfpm1
19	47010750	47016950	6200	4809.77	742	0	76952	Nt5c2
14	51737050	51742400	5350	4801.07	743	0	545047	Gm5800
3	84477350	84483250	5900	4796.65	744	0	229474	Fhdc1
3	107099300	107105700	6400	4794.09	745	0	16490	Kcna2
4	36949150	36954200	5050	4793.61	746	0	242384	Lingo2
3	157565200	157570300	5100	4782.47	747	0	19218	Ptger3
11	52761900	52766550	4650	4780.61	748	0	320027	Fstl4
10	22841500	22846150	4650	4765.19	749	0	21412	Tcf21
10	61974650	61981750	7100	4758.83	750	0	12817	Col13a1
8	94692900	94698200	5300	4746.57	751	0	67801	Pllp
6	32582400	32593600	11200	4721.09	752	0	243743	Plxna4
8	70887750	70894850	7100	4710.69	753	0	76808	Rpl18a
2	152140150	152151100	10950	4709.62	754	0	21407	Tcf15
18	21650100	21654150	4050	4701.99	755	0	74644	4930426D05Rik
7	34671500	34677100	5600	4700.16	756	0	68947	Chst8
7	99266450	99271950	5500	4699.73	757	0	381967	Gm26705
2	153068800	153075900	7100	4699.37	758	0	228788	Ccm2l
5	115188750	115195450	6700	4698.63	759	0	29867	Cabp1
7	24634300	24641250	6950	4695.74	760	0	72434	Lypd3
2	163202100	163207100	5000	4693.7	761	0	269389	Tox2
8	106600700	106606500	5800	4686.68	762	0	12550	Cdh1
10	61415000	61421350	6350	4686.38	763	0	18119	Nodal
11	109011350	109012150	800	4686	764	0	12006	Axin2
1	91799200	91803350	4150	4681.35	765	0	13345	Twist2
3	93443050	93448500	5450	4676.44	766	0	99681	Tchh
11	98544350	98552000	7650	4675.11	767	0	69376	Zpbp2
12	108315100	108322100	7000	4666.91	768	0	214305	Hhipl1
16	3641750	3658700	16950	4662.3	769	0	258859	Or1f19
5	37025800	37033250	7450	4653.78	770	0	76071	Jakmip1
7	141947450	141952700	5250	4651.6	771	0	75770	Brsk2
2	31311950	31318850	6900	4646.84	772	0	665700	Hmcn2
7	79048600	79057600	9000	4644.35	773	0	11595	Acan
3	27369400	27375800	6400	4634.46	774	0	208188	Ghsr
19	30545550	30550950	5400	4626.66	775	0	13380	Dkk1
11	97111900	97116800	4900	4619.7	776	0	57765	Tbx21
6	121410400	121416200	5800	4619.03	777	0	243621	Iqsec3
13	94593100	94598600	5500	4618.51	778	0	11774	Ap3b1
1	154722700	154730300	7600	4615.04	779	0	12290	Cacna1e
6	51171550	51177750	6200	4599.38	780	0	387166	Mir148a
4	130136500	130143100	6600	4598.9	781	0	230777	Hcrtr1
6	7553200	7558500	5300	4593.77	782	0	21333	Tac1
1	180694500	180699100	4600	4587.11	783	0	27217	Mixl1
15	80285550	80290100	4550	4576.68	784	0	239556	Cacna1i
11	69964100	69969650	5550	4571.01	785	0	54351	Elp5
10	60825000	60835950	10950	4569.93	786	0	107449	Unc5b
11	72132250	72138600	6350	4558.67	787	0	327958	Pitpnm3
2	172040150	172045450	5300	4558.21	788	0	228942	Cbln4
17	35318700	35324400	5700	4534.82	789	0	15006	H2-Q1
11	70212550	70216650	4100	4530.08	790	0	216867	Slc16a11
11	83440250	83448250	8000	4529.59	791	0	66330	1700020L24Rik
9	52676700	52680600	3900	4520.24	792	0	382139	Gm1715
8	12499200	12503800	4600	4519.68	793	0	434280	Sox1ot
7	135409100	135413300	4200	4518.07	794	0	270004	Foxi2
15	97997800	98006700	8900	4516.96	795	0	12824	Col2a1
1	86040300	86048250	7950	4514.43	796	0	72792	2810459M11Rik
9	30940250	30946350	6100	4490.1	797	0	30806	Adamts8
11	114061300	114070650	9350	4489.2	798	0	237979	Sdk2
13	38149400	38153100	3700	4476.09	799	0	109620	Dsp
7	118489200	118493800	4600	4473.73	800	0	319622	Itpripl2
2	113756150	113761750	5600	4468.12	801	0	23892	Grem1
5	143287500	143296900	9400	4450.43	802	0	330230	Zfp853
5	22340100	22347050	6950	4442.79	803	0	19699	Reln
2	69583500	69589500	6000	4437.51	804	0	14725	Lrp2
1	154200750	154206200	5450	4433.55	805	0	100503355	Zfp648
9	69666300	69674850	8550	4422.11	806	0	64290	Foxb1
2	31842850	31848750	5900	4417.05	807	0	98970	Fibcd1
3	89828150	89834500	6350	4414.61	808	0	214547	She
7	48956400	48965150	8750	4414.4	809	0	78286	Nav2
17	36940750	36948100	7350	4413.81	810	0	386454	Rnf39
4	143348050	143353050	5000	4403.12	811	0	242735	Lrrc38
7	49674800	49681600	6800	4402.19	812	0	13172	Dbx1
18	34859750	34864750	5000	4399.54	813	0	13653	Egr1
5	120691400	120702400	11000	4385.61	814	0	14357	Dtx1
8	32881050	32887200	6150	4376.31	815	0	211323	Nrg1
10	127660900	127668600	7700	4373.08	816	0	72243	1700012D01Rik
14	119133750	119141500	7750	4362.76	817	0	50787	Hs6st3
13	98387850	98395550	7700	4358.63	818	0	15229	Foxd1
2	31493050	31505850	12800	4358.46	819	0	432466	Gm5424
9	121637550	121644600	7050	4355.18	820	0	69032	Lyzl4
3	45377900	45383200	5300	4355.03	821	0	72511	2610316D01Rik
9	110718450	110731700	13250	4346.92	822	0	19228	Pth1r
5	34285400	34288850	3450	4346.48	823	0	231125	Zfyve28
9	8899050	8903200	4150	4343.64	824	0	18667	Pgr
5	138818600	138824400	5800	4341.91	825	0	384244	Foxl3
4	117297800	117306300	8500	4338.14	826	0	66743	Rnf220
3	95166650	95174750	8100	4331.41	827	0	20360	Sema6c
11	82432200	82436400	4200	4327.3	828	0	270893	Tmem132e
17	13211300	13223000	11700	4322.47	829	0	27263	Smok2a
13	56220600	56225000	4400	4322.27	830	0	75245	4930550C17Rik
11	6588550	6606850	18300	4319.03	831	0	216527	Ccm2
16	93681550	93686300	4750	4298.88	832	0	109857	Cbr3
2	180497500	180502200	4700	4290.2	833	0	18216	Ntsr1
8	71556150	71563600	7450	4287.58	834	0	434325	Tmem221
17	26110150	26120500	10350	4279.65	835	0	60455	Pgap6
2	93952950	93959200	6250	4263.85	836	0	69113	Alkbh3
17	43628050	43631050	3000	4259.38	837	0	210510	Tdrd6
5	114271800	114278600	6800	4254.04	838	0	116810	Foxn4
4	135137850	135143200	5350	4248.18	839	0	12399	Runx3
18	36279950	36288550	8600	4232.18	840	0	19290	Pura
13	100549250	100554300	5050	4227.8	841	0	18260	Ocln
7	19486850	19492300	5450	4225.62	842	0	74463	Exoc3l2
13	69734700	69741600	6900	4223.38	843	0	76980	Ube2ql1
6	91838000	91847100	9100	4216.36	844	0	243547	Grip2
7	19277100	19284400	7300	4215.44	845	0	232941	Ppm1n
1	89966900	89972750	5850	4210.5	846	0	208372	Asb18
11	72957750	72965750	8000	4203.16	847	0	53313	Atp2a3
2	152939650	152947600	7950	4191.93	848	0	252864	Dusp15
9	32339750	32346800	7050	4189.64	849	0	16521	Kcnj5
4	123102650	123109350	6700	4185.42	850	0	12164	Bmp8b
8	123114150	123120450	6300	4184.78	851	0	108148	Galnt2
16	31931250	31937400	6150	4178	852	0	239827	Pigz
12	56461150	56474150	13000	4173.97	853	0	104798	Sfta3-ps
X	98148100	98152850	4750	4172.43	854	0	11835	Ar
5	72500300	72506050	5750	4170.02	855	0	53419	Corin
6	29429650	29436350	6700	4168.27	856	0	68794	Flnc
7	3409250	3419300	10050	4165.79	857	0	81905	Cacng8
4	133597950	133604400	6450	4157.7	858	0	55948	Sfn
11	98048750	98054450	5700	4145.3	859	0	217154	Stac2
9	31129050	31134600	5550	4143.46	860	0	19143	St14
18	34546300	34555300	9000	4142.24	861	0	20890	Wnt8a
12	14148650	14152650	4000	4120.66	862	0	105005	Lratd1
5	146260850	146261400	550	4111.42	863	0	264064	Cdk8
7	29169200	29175000	5800	4108.23	864	0	57296	Psmd8
2	119236350	119240350	4000	4099.36	865	0	20732	Spint1
6	18029150	18032950	3800	4097.41	866	0	22413	Wnt2
15	100723850	100731600	7750	4089.35	867	0	619313	I730030J21Rik
2	13008950	13013950	5000	4079.96	868	0	227580	C1ql3
6	119326550	119333100	6550	4078.19	869	0	319734	Cacna2d4
8	92956750	92963500	6750	4070.55	870	0	20538	Slc6a2
2	128122100	128128750	6650	4070.55	871	0	74121	Acoxl
11	103191850	103200650	8800	4068.35	872	0	69441	Efcab15
5	147219700	147229450	9750	4062.2	873	0	70147	Plut
2	168908500	168913950	5450	4060.13	874	0	22722	Zfp64
11	94470600	94479150	8550	4036.55	875	0	217116	Spata20
9	21960200	21965450	5250	4030.42	876	0	13857	Epor
6	31557900	31565800	7900	4023.62	877	0	27205	Podxl
4	134340750	134344900	4150	4023.62	878	0	230810	Slc30a2
13	105442500	105446900	4400	4019.92	879	0	15550	Htr1a
1	131241650	131249650	8000	4018.42	880	0	54354	Rassf5
10	44526550	44530950	4400	4013.58	881	0	12142	Prdm1
12	30883200	30886750	3550	4011.46	882	0	100294583	Alkal2
10	75312800	75320550	7750	4009.39	883	0	11540	Adora2a
4	148949450	148954500	5050	4008.72	884	0	69743	Casz1
7	35582300	35587600	5300	4008.21	885	0	245886	Ankrd27
5	98852550	98858200	5650	4007.53	886	0	110075	Bmp3
1	134704300	134712200	7900	3997.09	887	0	20980	Syt2
18	61009250	61016250	7000	3994.23	888	0	240332	Slc6a7
2	181035150	181047250	12100	3989.7	889	0	11438	Chrna4
10	79607200	79615650	8450	3989	890	0	237397	C2cd4c
2	149828300	149833000	4700	3977.5	891	0	433485	Syndig1
10	115583900	115589900	6000	3967.05	892	0	14160	Lgr5
2	168762050	168771350	9300	3965.91	893	0	99377	Sall4
9	114558800	114565400	6600	3965.61	894	0	636931	Trim71
14	55759800	55770500	10700	3964.94	895	0	57260	Ltb4r2
8	111887700	111893150	5450	3961.82	896	0	56773	Chst5
12	98571900	98579200	7300	3961.75	897	0	72258	Kcnk10
14	14344350	14352550	8200	3961.27	898	0	16188	Il3ra
11	74587400	74592050	4650	3960.15	899	0	380711	Rap1gap2
7	24608650	24614000	5350	3960.08	900	0	66071	Ethe1
4	114840550	114848400	7850	3955.02	901	0	433746	Gm12830
1	39191600	39195900	4300	3948.23	902	0	18143	Npas2
1	136256150	136262550	6400	3934.96	903	0	383563	Gpr25
1	5915000	5918100	3100	3930.54	904	0	226304	Npbwr1
12	78904250	78914600	10350	3929.47	905	0	27260	Plek2
2	33542550	33548800	6250	3928.18	906	0	16917	Lmx1b
2	31880550	31891000	10450	3927.21	907	0	23928	Lamc3
7	44424150	44433100	8950	3925.95	908	0	272381	Lrrc4b
9	54762650	54768650	6000	3919.31	909	0	12903	Crabp1
15	73834100	73843450	9350	3918.85	910	0	268816	Mroh5
7	79790800	79796250	5450	3914.25	911	0	17292	Mesp1
5	147397800	147403950	6150	3906.02	912	0	14255	Flt3
11	16256750	16261500	4750	3900.74	913	0	211739	Vstm2a
15	102691700	102697650	5950	3899.82	914	0	67488	Calcoco1
9	35303950	35306000	2050	3899.06	915	0	71133	4933422A05Rik
15	100634300	100638600	4300	3888.51	916	0	207818	Smagp
12	86986950	86992950	6000	3887.07	917	0	238331	Zdhhc22
10	81362500	81375600	13100	3885.59	918	0	73822	Mfsd12
17	25949650	25954600	4950	3878.94	919	0	240054	D630044L22Rik
2	147083100	147089200	6100	3873.47	920	0	228731	Nkx2-4
15	101043650	101049700	6050	3870.08	921	0	20273	Scn8a
2	91974400	91978850	4450	3868.94	922	0	104418	Dgkz
2	163334500	163341850	7350	3868.8	923	0	59091	Jph2
17	51829450	51836250	6800	3866.63	924	0	20230	Satb1
14	70174850	70178650	3800	3861.23	925	0	213019	Pdlim2
11	103747400	103753750	6350	3860.53	926	0	22412	Wnt9b
13	72814750	72820900	6150	3853.34	927	0	78446	D730050B12Rik
8	25098950	25104950	6000	3842.96	928	0	83436	Plekha2
2	163916100	163921450	5350	3839.36	929	0	241770	Rims4
8	95672950	95680400	7450	3838.26	930	0	234593	Ndrg4
15	98673350	98680100	6750	3832.02	931	0	223881	Rnd1
X	101381600	101387550	5950	3829.07	932	0	14618	Gjb1
1	9965700	9969950	4250	3825.23	933	0	69312	Ppp1r42
1	184880750	184886100	5350	3822.01	934	0	226777	C130074G19Rik
2	60793300	60803100	9800	3821.2	935	0	56878	Rbms1
7	99623450	99629650	6200	3819.11	936	0	100503386	Tpbgl
1	181350900	181356150	5250	3814.08	937	0	72978	Cnih3
17	35339850	35345400	5550	3812.31	938	0	15013	H2-Q2
9	55022650	55028650	6000	3810.94	939	0	110834	Chrna3
12	106476800	106485300	8500	3810.36	940	0	76639	1700121N20Rik
10	122447650	122450450	2800	3805.03	941	0	54140	Avpr1a
11	97496500	97503200	6700	3796.09	942	0	58996	Arhgap23
17	35466150	35472600	6450	3793.58	943	0	15007	H2-Q10
11	52164950	52171550	6600	3788.53	944	0	257871	Or2y7
7	49243100	49249500	6400	3776.4	945	0	78286	Nav2
15	79035450	79046050	10600	3776.38	946	0	26912	Gcat
2	180268700	180281300	12600	3771.06	947	0	271887	Rbbp8nl
11	119389150	119397400	8250	3767.31	948	0	672511	Rnf213
2	45107050	45117950	10900	3756.54	949	0	433424	Zeb2os
5	120299850	120306900	7050	3755.2	950	0	74111	Rbm19
4	46532450	46537100	4650	3749.68	951	0	74735	Trim14
10	4708250	4714200	5950	3740.94	952	0	13982	Esr1
Y	90737400	90744800	7400	3738.75	953	0	654820	G530011O06Rik
8	120968100	120975750	7650	3727.61	954	0	108148	Galnt2
13	51564400	51571250	6850	3723.21	955	0	20418	Shc3
11	9117000	9121750	4750	3714.88	956	0	22271	Upp1
7	35184200	35190050	5850	3714.39	957	0	53896	Slc7a10
6	55449850	55459200	9350	3708.19	958	0	11517	Adcyap1r1
18	75817450	75822500	5050	3702.92	959	0	207259	Zbtb7c
7	100004450	100011300	6850	3701.39	960	0	69121	Chrdl2
10	73096300	73102650	6350	3696.79	961	0	11994	Pcdh15
5	75974750	75979250	4500	3685.58	962	0	16542	Kdr
19	60463850	60469400	5550	3679.73	963	0	226278	Prlhr
7	19301000	19309650	8650	3670.76	964	0	14282	Fosb
7	143498400	143503300	4900	3669.57	965	0	22113	Phlda2
11	53461050	53468950	7900	3666.09	966	0	71774	Shroom1
19	5444600	5452050	7450	3654.5	967	0	14283	Fosl1
11	22856500	22861350	4850	3641.81	968	0	53625	B3gnt2
10	80290850	80302950	12100	3628.1	969	0	23805	Apc2
18	77793100	77797550	4450	3624.21	970	0	619308	F830208F22Rik
19	43582100	43586600	4500	3620.36	971	0	102465114	Mir3084-2
12	31071900	31077850	5950	3617.15	972	0	104943	Fam110c
17	24204650	24213000	8350	3614.99	973	0	224617	Tbc1d24
19	6829800	6832500	2700	3614.48	974	0	56613	Rps6ka4
1	134231750	134238350	6600	3613.05	975	0	11539	Adora1
4	46037050	46043600	6550	3606.71	976	0	21916	Tmod1
11	69233200	69238250	5050	3605.08	977	0	14919	Gucy2e
9	95557900	95563700	5800	3603.28	978	0	75552	Paqr9
7	81210350	81216950	6600	3594.86	979	0	18584	Pde8a
5	52111800	52115700	3900	3594.65	980	0	102466648	Mir6417
9	107377600	107385100	7500	3584.12	981	0	56808	Cacna2d2
1	172489650	172503250	13600	3573.14	982	0	93842	Igsf9
12	113352750	113366550	13800	3560.49	983	0	238405	Adam6b
6	114039550	114045200	5650	3558.91	984	0	11941	Atp2b2
2	127652600	127658850	6250	3555.97	985	0	17153	Mal
8	84975350	84982400	7050	3547.27	986	0	16477	Junb
8	84933700	84938100	4400	3542.09	987	0	56527	Mast1
3	116250100	116253750	3650	3540.47	988	0	64378	Gpr88
6	31217650	31221800	4150	3537.45	989	0	73652	2210408F21Rik
17	56749750	56758150	8400	3537.4	990	0	18188	Nrtn
18	36318350	36324900	6550	3535.31	991	0	109169	Igip
18	23038050	23042700	4650	3533.7	992	0	319211	Nol4
7	25004650	25012000	7350	3524.39	993	0	232975	Atp1a3
4	148399950	148410000	10050	3523.23	994	0	71707	Ubiad1
6	39869550	39875350	5800	3518.69	995	0	434008	Tmem178b
7	47130450	47135600	5150	3504.27	996	0	19259	Ptpn5
11	69798550	69806600	8050	3491.36	997	0	380705	Tmem102
X	73634650	73642350	7700	3479.72	998	0	75590	Dusp9
11	78922450	78927400	4950	3468.22	999	0	18126	Nos2
6	53283200	53291350	8150	3465.99	1000	0	231991	Creb5
18	74955350	74964550	9200	3465.71	1001	0	16891	Lipg
1	18056750	18060100	3350	3464.5	1002	0	78081	Crisp4
7	113764450	113768950	4500	3447.97	1003	0	233744	Spon1
19	43438900	43444200	5300	3446.85	1004	0	83674	Cnnm1
8	76898500	76904500	6000	3443.14	1005	0	110784	Nr3c2
11	63128600	63135950	7350	3437.54	1006	0	18858	Pmp22
2	156613650	156617800	4150	3433.94	1007	0	228836	Dlgap4
12	67218200	67223950	5750	3428.86	1008	0	320772	Mdga2
1	87505750	87512800	7050	3428.67	1009	0	53972	Ngef
11	102104950	102110000	5050	3427.82	1010	0	217212	Pyy
12	53245650	53249850	4200	3424.97	1011	0	27386	Npas3
14	33344450	33355100	10650	3423.4	1012	0	239027	Arhgap22
2	157911050	157919550	8500	3421.03	1013	0	277432	Vstm2l
11	75792300	75798550	6250	3420.69	1014	0	13447	Doc2b
4	155358100	155363450	5350	3420.19	1015	0	18762	Prkcz
12	11147300	11153300	6000	3419.53	1016	0	238076	Kcns3
9	34485350	34493950	8600	3415.52	1017	0	67703	Kirrel3
2	126551100	126555300	4200	3413.65	1018	0	26458	Slc27a2
12	84640200	84645300	5100	3409.3	1019	0	432677	Vrtn
2	25393300	25401550	8250	3404.97	1020	0	18146	Npdc1
18	66289450	66293950	4500	3404.46	1021	0	320924	Ccbe1
2	136057300	136061000	3700	3400.67	1022	0	76161	Lamp5
1	75215400	75221800	6400	3398.18	1023	0	381272	A630095N17Rik
7	45866850	45874850	8000	3397.78	1024	0	68137	Kdelr1
14	66909150	66914400	5250	3390.24	1025	0	239157	Pnma2
1	171192050	171196700	4650	3389.78	1026	0	66425	Pcp4l1
1	50924400	50928700	4300	3383.72	1027	0	56363	Tmeff2
6	145861650	145867450	5800	3377.94	1028	0	79362	Bhlhe41
2	5378550	5379450	900	3367.63	1029	0	227541	Camk1d
10	42612700	42616300	3600	3367.12	1030	0	14628	Ostm1
17	14277850	14282550	4700	3364.08	1031	0	64074	Smoc2
2	132942850	132947650	4800	3356.89	1032	0	241639	Fermt1
8	99413700	99418600	4900	3354.31	1033	0	234624	A330008L17Rik
9	57938300	57944750	6450	3353.61	1034	0	20361	Sema7a
19	41737850	41744800	6950	3345.44	1035	0	20562	Slit1
16	97761250	97767600	6350	3341.04	1036	0	72388	Ripk4
6	28128550	28136200	7650	3335.59	1037	0	14823	Grm8
16	97608000	97612150	4150	3327.62	1038	0	50528	Tmprss2
14	57055450	57059750	4300	3324.07	1039	0	14611	Gja3
8	9768850	9773200	4350	3321.54	1040	0	270028	Nalf1
16	8422350	8427500	5150	3315.01	1041	0	74720	Tmem114
17	25807250	25821000	13750	3314.67	1042	0	214931	Fbxl16
2	75136200	75139900	3700	3312.98	1043	0	53375	Mtx2
17	69074700	69080100	5400	3309.44	1044	0	13823	Epb41l3
2	115851750	115855600	3850	3302.65	1045	0	17536	Meis2
4	49843700	49848450	4750	3301.22	1046	0	242443	Grin3a
4	124879000	124886950	7950	3299.27	1047	0	230735	Epha10
11	74608350	74613850	5500	3293.47	1048	0	380711	Rap1gap2
9	99355300	99359650	4350	3292.25	1049	0	272636	Esyt3
4	103617550	103623850	6300	3288.6	1050	0	13131	Dab1
16	57391150	57392600	1450	3286.85	1051	0	78749	Filip1l
11	116217900	116226500	8600	3274.75	1052	0	69681	Cdk3
13	48728550	48734600	6050	3272.02	1053	0	12022	Barx1
14	118436600	118439400	2800	3269.7	1054	0	73306	1700044C05Rik
16	30305850	30311050	5200	3243.86	1055	0	14729	Gp5
17	87741850	87749150	7300	3233.06	1056	0	210741	Kcnk12
2	90884200	90891300	7100	3232.89	1057	0	67445	C1qtnf4
7	37767450	37776050	8600	3225.96	1058	0	243937	Zfp536
8	88447950	88457250	9300	3223.09	1059	0	93960	Nkd1
2	131545050	131550550	5500	3217.91	1060	0	11550	Adra1d
15	85730850	85738100	7250	3214.25	1061	0	19013	Ppara
16	22654650	22659200	4550	3213.18	1062	0	110197	Dgkg
6	36385800	36391150	5350	3208.56	1063	0	319472	9330158H04Rik
13	55419000	55423100	4100	3200.39	1064	0	58992	F12
5	30709850	30717200	7350	3200.12	1065	0	65254	Dpysl5
12	80690650	80695850	5200	3198.66	1066	0	68354	Plekhd1os
9	89619700	89624300	4600	3193.08	1067	0	209743	Minar1
12	37105650	37109950	4300	3187.12	1068	0	17286	Meox2
15	75710800	75723600	12800	3186.15	1069	0	14787	Rhpn1
6	142568400	142573550	5150	3185.93	1070	0	16523	Kcnj8
6	105676300	105681000	4700	3182.3	1071	0	269784	Cntn4
7	64079600	64091650	12050	3182.03	1072	0	17364	Trpm1
7	57506100	57511500	5400	3177.32	1073	0	14402	Gabrb3
1	14753200	14758700	5500	3173.53	1074	0	17681	Msc
12	86210400	86217800	7400	3173.12	1075	0	328136	Gm805
5	147750800	147755900	5100	3171.61	1076	0	14254	Flt1
9	43877350	43881750	4400	3171.02	1077	0	58235	Nectin1
1	132876650	132883200	6550	3170.15	1078	0	16980	Lrrn2
13	73534650	73539350	4700	3168.21	1079	0	13162	Slc6a3
13	92425550	92428950	3400	3153.14	1080	0	218440	Ankrd34b
13	103331600	103337900	6300	3149.76	1081	0	328329	Mast4
4	129985150	129991100	5950	3139.09	1082	0	230775	Adgrb2
2	165073100	165082050	8950	3137.9	1083	0	72211	1700025C18Rik
12	73544100	73547100	3000	3137.17	1084	0	238257	Tmem30b
2	181210900	181215550	4650	3136	1085	0	20811	Srms
9	46440300	46446700	6400	3135	1086	0	74361	4931429L15Rik
15	34833850	34839900	6050	3132.88	1087	0	16539	Kcns2
5	144545200	144549100	3900	3132.76	1088	0	53324	Nptx2
6	83159300	83163250	3950	3129.77	1089	0	71837	1700003E16Rik
6	113281250	113286200	4950	3123.35	1090	0	97287	Mtmr14
3	3000100	3008900	8800	3116.28	1091	0	30942	Hnf4g
1	170906150	170910800	4650	3106.07	1092	0	435653	Fcrlb
14	56361550	56369450	7900	3103.49	1093	0	192113	Atp12a
7	143975350	143982050	6700	3102.92	1094	0	210274	Shank2
4	91369350	91375850	6500	3100.26	1095	0	15569	Elavl2
7	18958000	18968050	10050	3094.38	1096	0	384569	Nova2
8	106506800	106512300	5500	3090.83	1097	0	12560	Cdh3
17	46482850	46488450	5600	3089.27	1098	0	106763	Ttbk1
2	124088900	124092500	3600	3085.19	1099	0	214968	Sema6d
15	76293450	76298950	5500	3072.97	1100	0	75475	Oplah
12	108697650	108705400	7750	3070.83	1101	0	70059	Degs2
7	131640950	131650300	9350	3069.59	1102	0	14183	Fgfr2
5	112226700	112231100	4400	3069.41	1103	0	330166	Miat
4	123180600	123187700	7100	3066.52	1104	0	170638	Hpcal4
15	76086000	76091450	5450	3065.28	1105	0	223649	Nrbp2
14	33922200	33926650	4450	3060.49	1106	0	14560	Gdf10
4	120029950	120036600	6650	3058.01	1107	0	16656	Hivep3
5	35756600	35762250	5650	3057.48	1108	0	231148	Ablim2
5	150951000	150954950	3950	3055.92	1109	0	16591	Kl
12	100897350	100905450	8100	3052.09	1110	0	238377	Gpr68
2	160906000	160913650	7650	3049.6	1111	0	64899	Lpin3
X	105762650	105767200	4550	3043.85	1112	0	80903	Fgf16
9	21013650	21018000	4350	3029.69	1113	0	15894	Icam1
8	35825050	35827750	2700	3024.18	1114	0	71908	Cldn23
6	117166400	117170550	4150	3018.29	1115	0	20315	Cxcl12
9	58820250	58826600	6350	3017.23	1116	0	330953	Hcn4
3	26330300	26334750	4450	3017.06	1117	0	192167	Nlgn1
9	56619400	56629100	9700	3005.24	1118	0	235402	Lingo1
17	26196750	26206750	10000	3003.28	1119	0	69191	Pdia2
6	118011500	118018250	6750	3002.67	1120	0	70727	Rasgef1a
2	130360450	130364150	3700	3000.02	1121	0	228598	Ebf4
6	128296000	128303700	7700	2994.23	1122	0	21679	Tead4
1	119048500	119056200	7700	2990.07	1123	0	14633	Gli2
1	135816650	135820850	4200	2989.54	1124	0	16763	Lad1
16	90829600	90834350	4750	2988.79	1125	0	70967	Eva1c
15	74667900	74677950	10050	2986.21	1126	0	11838	Arc
3	96593000	96600400	7400	2983.25	1127	0	69870	Polr3gl
9	78390700	78398600	7900	2982.29	1128	0	100048658	Ddx43
1	87124000	87129500	5500	2981.49	1129	0	11648	Akp3
4	63211500	63218200	6700	2979.77	1130	0	373864	Col27a1
6	3762950	3766300	3350	2976.22	1131	0	12311	Calcr
17	25495100	25501050	5950	2972.69	1132	0	20609	Sstr5
9	62674850	62681200	6350	2969.66	1133	0	319480	Itga11
8	94170650	94176700	6050	2966.16	1134	0	17750	Mt2
1	125909850	125914050	4200	2962.87	1135	0	72585	Lypd1
13	63567700	63575000	7300	2950.81	1136	0	19206	Ptch1
9	22048750	22054050	5300	2949.28	1137	0	319601	Zfp653
8	40284450	40287750	3300	2944.54	1138	0	80857	Fgf20
12	111405700	111414050	8350	2939.58	1139	0	380787	Lbhd2
11	117776900	117784700	7800	2934.6	1140	0	217356	Tmc8
3	87771550	87780650	9100	2931	1141	0	73182	Pear1
8	84908200	84915100	6900	2922.32	1142	0	56527	Mast1
8	126137550	126140450	2900	2918	1143	0	210027	Slc35f3
3	68867650	68871900	4250	2911.31	1144	0	68725	1110032F04Rik
16	91297450	91307100	9650	2910.56	1145	0	50914	Olig1
5	131303900	131309000	5100	2910.2	1146	0	212996	Galnt17
9	87014100	87016950	2850	2908.95	1147	0	382089	Ripply2
4	148856600	148864000	7400	2901.71	1148	0	69743	Casz1
12	112587200	112596450	9250	2899.09	1149	0	70435	Inf2
7	119181750	119187500	5750	2898.99	1150	0	209776	Gpr139
7	25362400	25371450	9050	2897.9	1151	0	72383	Cnfn
5	76855550	76859200	3650	2895.34	1152	0	320827	Cracd
1	23759400	23765650	6250	2894.91	1153	0	280645	B3gat2
X	146959000	146964100	5100	2893.64	1154	0	15560	Htr2c
6	92939200	92945850	6650	2891.5	1155	0	330385	9530026P05Rik
11	32214550	32226100	11550	2890.27	1156	0	17168	Nprl3
17	34627450	34632850	5400	2888.49	1157	0	54397	Ppt2
11	31368200	31374100	5900	2881.32	1158	0	20856	Stc2
14	70622850	70630300	7450	2878.79	1159	0	13829	Dmtn
13	113030800	113036650	5850	2872.79	1160	0	735309	Mir449c
15	83249550	83254050	4500	2869.84	1161	0	239559	A4galt
2	180639050	180642550	3500	2868.49	1162	0	277353	Tcfl5
7	29016750	29023350	6600	2866.57	1163	0	20190	Ryr1
6	110643950	110649000	5050	2865.03	1164	0	108073	Grm7
7	4141250	4152800	11550	2864.81	1165	0	58804	Cdc42ep5
X	31762950	31772050	9100	2862.33	1166	0	668960	Btbd35f10
1	34535100	34539350	4250	2860.93	1167	0	12627	Cfc1
18	76055650	76061850	6200	2860.66	1168	0	207259	Zbtb7c
10	81402750	81415100	12350	2853.29	1169	0	18029	Nfic
19	28676850	28681400	4550	2846.97	1170	0	320176	D930032P07Rik
4	130306650	130312300	5650	2843.95	1171	0	14077	Fabp3
8	119447050	119453200	6150	2842.81	1172	0	117148	Necab2
15	89063850	89069350	5500	2839.39	1173	0	406218	Panx2
2	168598100	168604150	6050	2836.27	1174	0	18019	Nfatc2
5	120177500	120191600	14100	2835.11	1175	0	74111	Rbm19
13	23394000	23399000	5000	2826.16	1176	0	75887	4930586N03Rik
6	113792400	113806850	14450	2826.02	1177	0	11941	Atp2b2
19	19107350	19112600	5250	2825.87	1178	0	225998	Rorb
13	13782650	13789900	7250	2823.42	1179	0	14706	Gng4
14	34658700	34663450	4750	2823.13	1180	0	218914	Wapl
12	112679150	112682650	3500	2817.32	1181	0	382639	Zbtb42
7	142478000	142488650	10650	2814.72	1182	0	16985	Lsp1
9	43203500	43207250	3750	2813.94	1183	0	18988	Pou2f3
3	87744550	87758650	14100	2813.33	1184	0	74485	Lrrc71
X	103691850	103697200	5350	2811.55	1185	0	20502	Slc16a2
2	168047300	168053150	5850	2810.99	1186	0	58220	Pard6b
13	76053900	76058000	4100	2809.9	1187	0	238725	Gpr150
8	15008150	15014400	6250	2809.49	1188	0	74901	Kbtbd11
12	61520850	61527050	6200	2807.37	1189	0	238205	Lrfn5
11	61682350	61687550	5200	2802.46	1190	0	69640	Fam83g
9	44284850	44289400	4550	2801.25	1191	0	192663	Abcg4
7	25311800	25318200	6400	2794.98	1192	0	330485	Tmem145
13	119611800	119617650	5850	2791.74	1193	0	633640	Tmem267
12	80516100	80521350	5250	2783.72	1194	0	69522	2310002D06Rik
6	113886750	113893350	6600	2782.09	1195	0	11941	Atp2b2
13	96922850	96927000	4150	2779.39	1196	0	218476	Gcnt4
17	23678400	23685050	6650	2779.05	1197	0	56863	Cldn9
1	75312700	75319200	6500	2778.27	1198	0	13437	Dnpep
9	123676150	123679800	3650	2775.11	1199	0	12769	Ccr9
12	80758250	80760950	2700	2775.02	1200	0	380768	Ccdc177
9	32404600	32412000	7400	2774.77	1201	0	56379	Kcnj1
11	81151200	81153750	2550	2774.46	1202	0	11418	Asic2
6	77242200	77247200	5000	2772.59	1203	0	74342	Lrrtm1
5	37159800	37164750	4950	2772.12	1204	0	381634	Gm1043
6	114125000	114134300	9300	2770.13	1205	0	243616	Slc6a11
17	25430150	25438250	8100	2766.24	1206	0	58226	Cacna1h
4	117926100	117931150	5050	2765.51	1207	0	11876	Artn
11	97135700	97144550	8850	2764.17	1208	0	73174	Tbkbp1
9	81630700	81634600	3900	2762.52	1209	0	319405	D430036J16Rik
11	80153100	80156600	3500	2760.38	1210	0	216991	Adap2
4	148925200	148934750	9550	2759.43	1211	0	69743	Casz1
10	77685000	77693100	8100	2759	1212	0	252974	Tspear
9	103109800	103115800	6000	2758.3	1213	0	270192	Rab6b
2	152080250	152087950	7700	2756.04	1214	0	545474	Scrt2
1	89990900	89994950	4050	2751.8	1215	0	208372	Asb18
3	132083500	132088250	4750	2751.17	1216	0	56811	Dkk2
17	25568700	25575200	6500	2751.12	1217	0	72834	Cerox1
4	148249450	148260850	11400	2747.16	1218	0	242748	Disp3
14	66278000	66281700	3700	2747.16	1219	0	19229	Ptk2b
7	143104450	143111700	7250	2739.7	1220	0	16535	Kcnq1
17	33997700	34002050	4350	2735.64	1221	0	14972	H2-K1
17	8338400	8342950	4550	2725.8	1222	0	320111	Prr18
10	81339750	81345850	6100	2724.87	1223	0	209047	Gipc3
4	154021700	154032450	10750	2718.11	1224	0	68859	Smim1
13	53282600	53287600	5000	2716.55	1225	0	26564	Ror2
6	100458450	100466300	7850	2715.36	1226	0	73395	1700049E22Rik
9	14858200	14863750	5550	2714.39	1227	0	14608	Gpr83
18	38598900	38603050	4150	2713.4	1228	0	24066	Spry4
12	70344650	70348050	3400	2708.8	1229	0	94090	Trim9
17	71308350	71312300	3950	2708.65	1230	0	246707	Emilin2
9	20724800	20729550	4750	2703.18	1231	0	244723	Olfm2
5	128431300	128435350	4050	2703.16	1232	0	243274	Tmem132d
12	33927200	33929900	2700	2701.15	1233	0	114712	Ferd3l
9	112231900	112236400	4500	2697.84	1234	0	74100	Arpp21
15	6871000	6875400	4400	2696.62	1235	0	18414	Osmr
12	76530600	76535450	4850	2695.92	1236	0	263406	Plekhg3
8	120228700	120233700	5000	2693.49	1237	0	382034	Gse1
14	24001650	24007400	5750	2690.67	1238	0	78019	4930519K11Rik
16	18125100	18129850	4750	2690.52	1239	0	65079	Rtn4r
9	86877350	86881500	4150	2689.8	1240	0	20616	Snap91
11	70252050	70256500	4450	2687	1241	0	11684	Alox12
14	70201750	70209850	8100	2685.37	1242	0	20410	Sorbs3
10	80012800	80018450	5650	2684.25	1243	0	70719	Arhgap45
13	58805800	58810650	4850	2684.13	1244	0	18212	Ntrk2
11	114850100	114855300	5200	2683.77	1245	0	70355	Gprc5c
9	64017250	64024500	7250	2679.76	1246	0	17130	Smad6
11	35449700	35459500	9800	2676.13	1247	0	20564	Slit3
18	77183950	77189200	5250	2675.87	1248	0	225742	St8sia5
17	48930000	48935200	5200	2674.07	1249	0	70530	Lrfn2
2	158664500	158671000	6500	2671.76	1250	0	228852	Ppp1r16b
6	22286650	22290400	3750	2670.18	1251	0	93735	Wnt16
7	13031650	13041550	9900	2670.11	1252	0	68953	Chmp2a
2	168278750	168283450	4700	2663.22	1253	0	241794	Kcng1
14	61273200	61277500	4300	2663.06	1254	0	24053	Sgcg
4	141300950	141307300	6350	2661.04	1255	0	13836	Epha2
3	36519700	36523600	3900	2660.09	1256	0	100503068	Smim43
15	78670050	78675250	5200	2659.65	1257	0	207393	Elfn2
4	84672200	84678200	6000	2657.07	1258	0	242509	Bnc2
9	44040950	44046250	5300	2656.91	1259	0	21838	Thy1
1	132190600	132195900	5300	2653.94	1260	0	213409	Lemd1
3	105450650	105455550	4900	2647.25	1261	0	78635	Kcnd3os
2	114010300	114015850	5550	2643.48	1262	0	320846	A530058N18Rik
5	113332600	113336750	4150	2641.34	1263	0	102466821	Mir7230
1	136049250	136054350	5100	2637.53	1264	0	226439	Ascl5
1	34747350	34753100	5750	2634.59	1265	0	226970	Arhgef4
2	35579550	35585150	5600	2627.71	1266	0	69601	Dab2ip
2	29038250	29045550	7300	2616.94	1267	0	329375	Cfap77
17	34260900	34265900	5000	2608.82	1268	0	14961	H2-Ab1
4	126285750	126289850	4100	2607.2	1269	0	329941	Col8a2
18	67340950	67346450	5500	2606.83	1270	0	338360	B430212C06Rik
8	70861900	70867400	5500	2605.73	1271	0	84036	Kcnn1
5	47982700	47986950	4250	2603.93	1272	0	20563	Slit2
1	124043200	124047650	4450	2601.56	1273	0	269109	Dpp10
18	74060650	74066250	5600	2599.58	1274	0	225724	Mapk4
X	103320800	103323200	2400	2596.42	1275	0	12592	Cdx4
15	83720950	83726500	5550	2594.26	1276	0	64706	Scube1
6	115360950	115363300	2350	2587.38	1277	0	19016	Pparg
16	94119650	94127450	7800	2584.2	1278	0	20465	Sim2
10	89343550	89347150	3600	2582.32	1279	0	320091	Ano4
7	139892300	139899450	7150	2576.13	1280	0	76484	Kndc1
15	102100450	102109150	8700	2567.03	1281	0	209039	Tns2
5	101764150	101770600	6450	2564.8	1282	0	74596	Cds1
1	69105150	69110750	5600	2561.08	1283	0	13869	Erbb4
12	112795550	112805500	9950	2560.49	1284	0	217887	Clba1
5	119623850	119628700	4850	2558.26	1285	0	330183	Gm16063
5	127240400	127244950	4550	2557.22	1286	0	208213	Tmem132c
4	127965500	127973250	7750	2556.8	1287	0	635169	CK137956
6	37296900	37302050	5150	2553.5	1288	0	320127	Dgki
11	35795850	35799200	3350	2552.11	1289	0	237730	Fbll1
4	43423400	43430200	6800	2549.12	1290	0	329831	Cimip2b
16	94176450	94184250	7800	2548.34	1291	0	110948	Hlcs
7	19175050	19181850	6800	2542.94	1292	0	724063	Mir330
8	11003800	11010100	6300	2540.69	1293	0	619321	9530052E02Rik
5	146583050	146587550	4500	2538.06	1294	0	14738	Gpr12
13	12104200	12107400	3200	2533.37	1295	0	20191	Ryr2
6	120489650	120496750	7100	2533.08	1296	0	94047	Tmem121b
15	79247900	79255700	7800	2531.94	1297	0	57274	Slc16a8
18	52526600	52530500	3900	2530.28	1298	0	16948	Lox
10	29532850	29537700	4850	2529.87	1299	0	72780	Rspo3
18	37142800	37146700	3900	2527.95	1300	0	353237	Pcdhac2
9	79716900	79722800	5900	2524.6	1301	0	12816	Col12a1
4	82533850	82540400	6550	2522.68	1302	0	18028	Nfib
8	123507550	123516400	8850	2516.94	1303	0	72185	Dbndd1
14	115091900	115094550	2650	2515.91	1304	0	103978	Gpc5
11	113617150	113621900	4750	2515.12	1305	0	69806	Slc39a11
16	35657150	35662050	4900	2512.47	1306	0	20357	Sema5b
11	116916000	116923050	7050	2511.73	1307	0	268510	Mgat5b
7	4775450	4780750	5300	2508.5	1308	0	16156	Il11
4	152499300	152507150	7850	2504.68	1309	0	260305	Nphp4
8	23408050	23412750	4700	2502.21	1310	0	20377	Sfrp1
18	63383500	63388850	5350	2495.67	1311	0	667742	Piezo2
2	152624600	152631150	6550	2495.23	1312	0	19700	Rem1
2	143543850	143549800	5950	2493.97	1313	0	378776	Pcsk2os1
1	185452550	185458100	5550	2493.97	1314	0	226781	Slc30a10
11	100350900	100358950	8050	2493.5	1315	0	15114	Hap1
9	108077700	108086000	8300	2491.94	1316	0	84585	Rnf123
7	79612200	79620250	8050	2491.29	1317	0	56315	Rhcg
18	67386550	67391850	5300	2490.05	1318	0	67951	Tubb6
7	143358450	143367350	8900	2487.18	1319	0	16535	Kcnq1
3	29080850	29084950	4100	2486.79	1320	0	75740	Egfem1
1	34676750	34681100	4350	2480.45	1321	0	226970	Arhgef4
19	16434650	16439950	5300	2480.38	1322	0	14675	Gna14
7	46175350	46184300	8950	2478.24	1323	0	20927	Abcc8
9	45039950	45044050	4100	2473.59	1324	0	14012	Mpzl2
3	82902450	82906650	4200	2472.69	1325	0	79235	Lrat
5	119083950	119090150	6200	2470.1	1326	0	73477	1700081H04Rik
8	4243900	4254750	10850	2469.93	1327	0	26400	Map2k7
12	111668200	111673250	5050	2465.99	1328	0	12709	Ckb
4	134701700	134706350	4650	2464.89	1329	0	230815	Man1c1
19	45063350	45068100	4750	2464.35	1330	0	102465114	Mir3084-2
4	146453700	146458950	5250	2453.83	1331	0	433791	Zfp992
2	127535950	127542250	6300	2453.22	1332	0	192212	Prom2
1	82285800	82293450	7650	2453.2	1333	0	16367	Irs1
16	23979050	23983350	4300	2452.69	1334	0	12053	Bcl6
7	3300900	3306250	5350	2451.99	1335	0	50918	Myadm
18	45557950	45562250	4300	2451.84	1336	0	140492	Kcnn2
7	122287050	122291000	3950	2450.04	1337	0	18751	Prkcb
17	69437850	69442300	4450	2447.8	1338	0	320722	Akain1
16	28443850	28449100	5250	2446.4	1339	0	14167	Fgf12
18	36192550	36199500	6950	2445.54	1340	0	100042150	Nrg2
10	11078600	11082400	3800	2444.89	1341	0	14816	Grm1
9	107520400	107528700	8300	2438.52	1342	0	56808	Cacna2d2
8	122860300	122869000	8700	2437.2	1343	0	12555	Cdh15
8	124749450	124754050	4600	2435.84	1344	0	69627	Fam89a
8	23155300	23159650	4350	2434.94	1345	0	74561	Nkx6-3
6	148440750	148445400	4650	2434.12	1346	0	387314	Tmtc1
10	30840900	30845150	4250	2432.47	1347	0	15214	Hey2
11	101780850	101787850	7000	2427.73	1348	0	18612	Etv4
7	19019900	19025600	5700	2426.02	1349	0	68188	Sympk
12	17172250	17178050	5800	2423.95	1350	0	382571	Kcnf1
11	11683300	11687500	4200	2423.42	1351	0	22778	Ikzf1
11	52279550	52285750	6200	2422.25	1352	0	21414	Tcf7
4	106621250	106624950	3700	2419.22	1353	0	230576	Ttc22
16	20732200	20737600	5400	2419.22	1354	0	21832	Thpo
15	75564000	75568350	4350	2419.22	1355	0	23934	Ly6h
7	19468200	19474150	5950	2418.42	1356	0	74463	Exoc3l2
2	5133950	5139600	5650	2417.86	1357	0	74186	Ccdc3
6	119102600	119108400	5800	2417.51	1358	0	12288	Cacna1c
15	38469650	38474200	4550	2412.43	1359	0	54375	Azin1
5	57715000	57721750	6750	2410.37	1360	0	54216	Pcdh7
8	122333900	122338900	5000	2402.91	1361	0	22761	Zfpm1
7	81856150	81862950	6800	2399.8	1362	0	107769	Tm6sf1
6	30955700	30962850	7150	2397.85	1363	0	619665	Klf14
1	180480300	180484950	4650	2396.85	1364	0	381310	Stum
8	123409100	123413600	4500	2395.54	1365	0	22152	Tubb3
8	125051600	125056450	4850	2395.4	1366	0	244667	Disc1
3	152663450	152670400	6950	2393.98	1367	0	99542	AI115009
7	109780200	109785850	5650	2393.48	1368	0	78593	Nrip3
17	83545000	83549950	4950	2390.27	1369	0	20463	Cox7a2l
5	69338550	69342300	3750	2390.1	1370	0	243043	Kctd8
X	12082600	12092150	9550	2390.07	1371	0	71458	Bcor
4	108029350	108034550	5200	2388.93	1372	0	242608	Podn
6	103509750	103513700	3950	2388.52	1373	0	12661	Chl1
8	12312600	12320550	7950	2386.37	1374	0	434280	Sox1ot
16	85897600	85902700	5100	2383.05	1375	0	23794	Adamts5
5	24384500	24391450	6950	2382.19	1376	0	213948	Atg9b
8	120304850	120314050	9200	2381.95	1377	0	382034	Gse1
8	122458000	122465750	7750	2381.76	1378	0	30927	Snai3
6	85407500	85411500	4000	2378.45	1379	0	384452	Noto
4	104365750	104369900	4150	2378.28	1380	0	13131	Dab1
8	104169700	104174850	5150	2378.21	1381	0	65115	Bean1
10	128931100	128936550	5450	2376.78	1382	0	16404	Itga7
17	14200250	14205600	5350	2374.61	1383	0	240025	Dact2
2	104408050	104413850	5800	2367.37	1384	0	241589	D430041D05Rik
7	100927300	100935950	8650	2366.81	1385	0	207212	Arhgef17
9	107231250	107235050	3800	2356.43	1386	0	208869	Dock3
13	57904350	57909000	4650	2356.41	1387	0	20745	Spock1
13	72354350	72364350	10000	2356.16	1388	0	328287	Gm20554
3	158559300	158563000	3700	2349.77	1389	0	242274	Lrrc7
15	78201050	78207200	6150	2348.87	1390	0	19293	Pvalb
2	80443050	80448150	5100	2344.47	1391	0	20378	Frzb
13	10358400	10362450	4050	2343.04	1392	0	12671	Chrm3
16	91255400	91258700	3300	2336.84	1393	0	50914	Olig1
13	54735500	54740800	5300	2336.52	1394	0	26913	Gprin1
5	124121300	124131400	10100	2334.55	1395	0	19679	Pitpnm2
12	51592050	51595800	3750	2326.77	1396	0	12810	Coch
5	38317200	38321050	3850	2326.14	1397	0	13492	Drd5
2	32378450	32390050	11600	2324.08	1398	0	73737	Bbln
7	108949050	108952400	3350	2323.64	1399	0	22141	Tub
8	56618850	56624100	5250	2320.69	1400	0	50753	Fbxo8
4	123319850	123324600	4750	2320.18	1401	0	64059	Oxct2a
5	137286250	137291300	5050	2313.84	1402	0	11423	Ache
11	116650750	116655650	4900	2313.38	1403	0	114886	Cygb
13	74120200	74123950	3750	2311.72	1404	0	105243	Slc9a3
14	122405200	122409050	3850	2308.74	1405	0	328479	Gm5089
9	16499600	16503500	3900	2306.81	1406	0	270120	Fat3
2	11551800	11555100	3300	2305.4	1407	0	170768	Pfkfb3
18	84719000	84721500	2500	2303.7	1408	0	240479	Dipk1c
4	44423950	44427500	3550	2302.47	1409	0	17279	Melk
5	25098100	25102600	4500	2297.65	1410	0	67261	2900005J15Rik
7	143444250	143448400	4150	2296.61	1411	0	12577	Cdkn1c
8	106334250	106339300	5050	2296.36	1412	0	58994	Smpd3
4	126146550	126150950	4400	2292.42	1413	0	66938	Sh3d21
17	13539850	13547350	7500	2290	1414	0	72578	2700054A10Rik
1	93099950	93103700	3750	2289.89	1415	0	16560	Kif1a
11	59962050	59965800	3750	2286	1416	0	19416	Rasd1
6	126161750	126166800	5050	2283.89	1417	0	18205	Ntf3
8	106868700	106873600	4900	2283.31	1418	0	15118	Has3
1	133161650	133165800	4150	2281.92	1419	0	240753	Plekha6
9	27296500	27306150	9650	2278.13	1420	0	235086	Igsf9b
10	81311950	81319950	8000	2273.05	1421	0	18717	Pip5k1c
16	30599100	30602700	3600	2269.18	1422	0	224093	Fam43a
13	51914450	51920950	6500	2267.07	1423	0	23882	Gadd45g
15	89144800	89150000	5200	2264.05	1424	0	19094	Mapk11
15	99668600	99674150	5550	2262.92	1425	0	11419	Asic1
4	135569750	135574700	4950	2262.23	1426	0	230824	Grhl3
9	114054700	114058900	4200	2260.34	1427	0	382111	Susd5
16	11142900	11144350	1450	2259.95	1428	0	106205	Zc3h7a
5	129582350	129586700	4350	2259.48	1429	0	23948	Mmp17
2	130695350	130699450	4100	2259.31	1430	0	269356	Slc4a11
17	34597800	34606450	8650	2257.35	1431	0	55979	Agpat1
X	137568500	137573950	5450	2257.13	1432	0	60367	Il1rapl2
15	78838350	78845150	6800	2255.35	1433	0	104445	Cdc42ep1
13	72295350	72303300	7950	2254.24	1434	0	328287	Gm20554
5	138751900	138758250	6350	2254.06	1435	0	80752	Fam20c
12	72851850	72857400	5550	2247.97	1436	0	75801	4930447C04Rik
7	93078400	93083000	4600	2243.69	1437	0	100040298	Gm15501
7	113206850	113209050	2200	2241.45	1438	0	11865	Bmal1
8	102782400	102789000	6600	2241.16	1439	0	12552	Cdh11
X	93279250	93283250	4000	2238.22	1440	0	11878	Arx
11	50235800	50240300	4500	2235.54	1441	0	17001	Ltc4s
12	113326250	113333400	7150	2234.93	1442	0	69195	Tmem121
1	134295450	134301300	5850	2234.88	1443	0	68507	Ppfia4
2	25615100	25620650	5550	2234.32	1444	0	77058	Ccdc183
12	17322850	17325950	3100	2234.18	1445	0	68775	Atp6v1c2
6	85483250	85488050	4800	2233.98	1446	0	330369	Fbxo41
18	64659600	64663150	3550	2233.81	1447	0	54670	Atp8b1
5	136880550	136884900	4350	2230.1	1448	0	140709	Col26a1
4	140105150	140112100	6950	2222.15	1449	0	230868	Igsf21
14	55111700	55116350	4650	2221.74	1450	0	319984	Jph4
1	178527300	178532600	5300	2220.01	1451	0	269152	Kif26b
10	60579050	60587650	8600	2219.52	1452	0	22295	Cdh23
1	180933550	180938400	4850	2219.3	1453	0	13590	Lefty1
4	125726400	125730650	4250	2215.44	1454	0	14807	Grik3
4	114817700	114824600	6900	2214.18	1455	0	433746	Gm12830
19	23132050	23138150	6100	2213.47	1456	0	16601	Klf9
4	89686150	89689800	3650	2212.3	1457	0	242523	Dmrta1
4	98813500	98818900	5400	2212.14	1458	0	545660	I0C0044D17Rik
13	60170900	60179150	8250	2209.63	1459	0	14451	Gas1
7	100174800	100181100	6300	2209.39	1460	0	57442	Kcne3
4	106462600	106465750	3150	2208.49	1461	0	100102	Pcsk9
3	31307650	31312700	5050	2207.98	1462	0	241919	Slc7a14
16	18397900	18406250	8350	2207.29	1463	0	11877	Arvcf
9	32671650	32676950	5300	2200.07	1464	0	23871	Ets1
4	127327900	127333000	5100	2198.06	1465	0	14620	Gjb3
1	171063200	171065100	1900	2197.42	1466	0	14131	Fcgr3
1	152952250	152957000	4750	2194.97	1467	0	226518	Nmnat2
13	19914250	19922450	8200	2194.19	1468	0	353346	Gpr141
9	65627700	65632750	5050	2192.11	1469	0	71973	Rbpms2
6	127151300	127156050	4750	2190.65	1470	0	77558	9330179D12Rik
5	135105600	135109900	4300	2190.47	1471	0	58805	Mlxipl
17	69968150	69973000	4850	2188.17	1472	0	224997	Dlgap1
13	76380950	76385950	5000	2184.62	1473	0	78771	Mctp1
18	86392550	86397350	4800	2184.45	1474	0	246317	Neto1
2	181131950	181135200	3250	2182.8	1475	0	16536	Kcnq2
13	114455000	114459000	4000	2181.09	1476	0	14313	Fst
15	79090500	79100200	9700	2180.6	1477	0	223691	Eif3l
4	57139100	57143000	3900	2179.75	1478	0	54357	Epb41l4b
15	101126900	101130850	3950	2178.46	1479	0	11482	Acvrl1
5	30588000	30592800	4800	2171.68	1480	0	16527	Kcnk3
5	32130100	32137100	7000	2168.33	1481	0	14284	Fosl2
1	162474550	162480050	5500	2164.39	1482	0	103967	Dnm3
14	121504050	121507400	3350	2163.08	1483	0	56643	Slc15a1
18	25752300	25757850	5550	2161.94	1484	0	108013	Celf4
4	114795950	114803500	7550	2159.89	1485	0	433746	Gm12830
5	147955100	147959650	4550	2159.6	1486	0	77521	Mtus2
2	180221950	180229900	7950	2159.39	1487	0	16776	Lama5
16	17275750	17280900	5150	2153.52	1488	0	224020	Pi4ka
9	27790500	27792900	2400	2153.41	1489	0	330908	Opcml
4	149952550	149957650	5100	2151.39	1490	0	74646	Spsb1
2	25177000	25183150	6150	2149.85	1491	0	67122	Nrarp
13	21980000	21985750	5750	2149.01	1492	0	195236	Pom121l2
3	8507500	8512300	4800	2147.4	1493	0	20257	Stmn2
9	67046850	67050450	3600	2146.79	1494	0	22003	Tpm1
7	142368550	142373550	5000	2146.04	1495	0	320802	Ifitm10
15	76173700	76182500	8800	2144.66	1496	0	18810	Plec
4	132971750	132979000	7250	2144	1497	0	14191	Fgr
6	128032100	128037600	5500	2143.49	1498	0	109246	Tspan9
10	69397400	69402450	5050	2142.93	1499	0	11735	Ank3
11	97435150	97441700	6550	2136.19	1500	0	58996	Arhgap23
11	103330400	103336050	5650	2135.93	1501	0	544817	Arhgap27
8	64203000	64208900	5900	2135.51	1502	0	21892	Tll1
12	31262100	31268700	6600	2133.23	1503	0	16777	Lamb1
3	92078650	92084350	5700	2132.67	1504	0	16939	Lor
19	56873850	56877000	3150	2132.65	1505	0	240675	Vwa2
15	78801150	78804700	3550	2132.25	1506	0	105844	Card10
6	51429700	51435450	5750	2132.21	1507	0	18025	Nfe2l3
6	116456700	116463700	7000	2130.12	1508	0	11689	Alox5
2	132024400	132030150	5750	2129.94	1509	0	215653	Rassf2
17	35262250	35267200	4950	2127.91	1510	0	14980	H2-L
1	183299050	183299600	550	2127.1	1511	0	108909	Aida
12	24678450	24684000	5550	2124.89	1512	0	12879	Cys1
1	176272700	176276300	3600	2120.63	1513	0	319455	Pld5
6	125376400	125381300	4900	2114.03	1514	0	213522	Plekhg6
15	86028050	86033800	5750	2112.22	1515	0	12614	Celsr1
5	114655500	114661400	5900	2110.58	1516	0	63873	Trpv4
17	25473500	25482500	9000	2109.63	1517	0	71840	Tekt4
4	125564500	125575150	10650	2107.03	1518	0	14807	Grik3
4	136890550	136898800	8250	2106.63	1519	0	12262	C1qc
19	10455400	10459300	3900	2105.69	1520	0	278795	Lrrc10b
1	85275400	85278750	3350	2105.37	1521	0	620078	Sp140l2
2	130633550	130638850	5300	2104.79	1522	0	241638	Lzts3
5	73006100	73009050	2950	2104.64	1523	0	231290	Slc10a4
2	33128600	33133400	4800	2103.84	1524	0	99326	Garnl3
7	4920950	4930250	9300	2102.79	1525	0	269855	Ssc5d
2	156419500	156422500	3000	2099.83	1526	0	13821	Epb41l1
12	82615650	82619500	3850	2099.83	1527	0	50779	Rgs6
5	35674900	35681800	6900	2094.53	1528	0	78558	Htra3
4	116015100	116020750	5650	2094.26	1529	0	14073	Faah
2	151699400	151708100	8700	2093.04	1530	0	108832	Tmem74b
9	107703100	107711950	8850	2092.93	1531	0	20350	Sema3f
5	119746500	119751850	5350	2092.46	1532	0	433944	Tbx3os2
7	144676050	144681250	5200	2087.04	1533	0	101772	Ano1
2	31456450	31461400	4950	2085.76	1534	0	665700	Hmcn2
2	118972350	118978350	6000	2085.03	1535	0	269336	Ccdc32
18	80655750	80665900	10150	2082.35	1536	0	18018	Nfatc1
1	24584500	24588650	4150	2081.06	1537	0	12823	Col19a1
2	164994800	165002150	7350	2079.48	1538	0	57138	Slc12a5
3	118429700	118434050	4350	2078.73	1539	0	387155	Mir137
17	24687200	24691050	3850	2076.17	1540	0	20974	Syngr3
3	97887700	97891200	3500	2074.43	1541	0	83679	Pde4dip
18	25677800	25682500	4700	2072.65	1542	0	108013	Celf4
17	56457800	56463750	5950	2071.8	1543	0	19280	Ptprs
6	103649100	103649350	250	2069.91	1544	0	12661	Chl1
16	5884100	5888300	4200	2065.85	1545	0	268859	Rbfox1
13	95523900	95527050	3150	2062.86	1546	0	14063	F2rl1
6	72234100	72241050	6950	2062.57	1547	0	71093	Atoh8
8	34804550	34810900	6350	2060.76	1548	0	319520	Dusp4
16	29718500	29724100	5600	2059.06	1549	0	74143	Opa1
4	137679750	137683800	4050	2052.04	1550	0	110351	Rap1gap
12	109031600	109037700	6100	2051.87	1551	0	380785	Begain
2	121293700	121301350	7650	2049.97	1552	0	17754	Map1a
7	139084650	139093350	8700	2048.2	1553	0	26757	Dpysl4
6	65669550	65673650	4100	2046.54	1554	0	68169	Ndnf
2	162658750	162661100	2350	2046.28	1555	0	19281	Ptprt
2	153106650	153110000	3350	2045.19	1556	0	15162	Hck
12	105334900	105340200	5300	2042.88	1557	0	69952	Tunar
8	11311550	11315450	3900	2038.77	1558	0	12827	Col4a2
6	29495350	29499500	4150	2038.25	1559	0	333088	Kcp
14	68123300	68126450	3150	2038.16	1560	0	18040	Nefm
17	30899400	30906800	7400	2037.36	1561	0	224671	Btbd9
1	93232600	93239000	6400	2036.24	1562	0	208777	Sned1
6	91977700	91983550	5850	2036.09	1563	0	232237	Fgd5
18	65871700	65876000	4300	2035.2	1564	0	225642	Grp
4	55529450	55532350	2900	2033.68	1565	0	16600	Klf4
2	92058000	92061750	3750	2031.88	1566	0	192285	Phf21a
12	101023800	101030300	6500	2031.23	1567	0	68339	Ccdc88c
1	180892950	180897450	4500	2027.92	1568	0	320202	Lefty2
4	43521150	43526450	5300	2026.91	1569	0	22004	Tpm2
4	46599850	46604350	4500	2026.32	1570	0	107684	Coro2a
7	19576200	19579200	3000	2025.15	1571	0	69731	Gemin7
12	76707950	76711850	3900	2024.84	1572	0	20741	Sptb
4	154168650	154174850	6200	2024.71	1573	0	230971	Megf6
1	14504900	14508650	3750	2024.48	1574	0	14048	Eya1
16	35868950	35872900	3950	2023.26	1575	0	547253	Parp14
6	99725450	99728550	3100	2022.62	1576	0	50501	Prok2
11	77460950	77467150	6200	2020.36	1577	0	216961	Coro6
19	41205000	41209800	4800	2015.02	1578	0	24087	Tll2
1	72534150	72537700	3550	2012.03	1579	0	381270	Marchf4
8	29216000	29220150	4150	2011.44	1580	0	210801	Unc5d
2	181154400	181157600	3200	2011.05	1581	0	13628	Eef1a2
10	93831000	93835850	4850	2010.69	1582	0	327799	Usp44
15	74717850	74724200	6350	2009.96	1583	0	223626	Them6
7	109165600	109171600	6000	2006.77	1584	0	109594	Lmo1
8	92458500	92463600	5100	2004.52	1585	0	54352	Irx5
4	41636850	41644050	7200	2000.9	1586	0	69638	Enho
4	107844800	107848550	3750	1995.35	1587	0	16975	Lrp8
2	158548900	158554800	5900	1993.45	1588	0	545481	Arhgap40
12	83483750	83490200	6450	1992.15	1589	0	70127	Dpf3
2	5710300	5716300	6000	1990.86	1590	0	227541	Camk1d
15	103145100	103149300	4200	1990.07	1591	0	432989	D930007P13Rik
6	147261350	147265400	4050	1989.67	1592	0	19227	Pthlh
13	73841650	73848550	6900	1988.37	1593	0	72293	Nkd2
9	124422450	124426700	4250	1986.02	1594	0	19054	Ppp2r3d
7	101389300	101398800	9500	1984.31	1595	0	69710	Arap1
5	35039500	35047400	7900	1983.39	1596	0	71729	Rgs12
8	119896650	119899150	2500	1982.81	1597	0	22224	Usp10
7	44304200	44308050	3850	1981.72	1598	0	20256	Clec11a
4	127221700	127228300	6600	1981.47	1599	0	242667	Dlgap3
7	25131800	25137100	5300	1978.82	1600	0	18987	Pou2f2
8	123232300	123237900	5600	1977.51	1601	0	78779	Spata2l
4	138249300	138253450	4150	1977.05	1602	0	230863	Sh2d5
13	69484950	69491150	6200	1973.38	1603	0	210106	Tent4a
12	95691350	95696150	4800	1970.71	1604	0	399558	Flrt2
13	95443000	95446650	3650	1970.71	1605	0	12919	Crhbp
11	3995100	3999300	4200	1970.71	1606	0	53897	Gal3st1
X	155621750	155627300	5550	1970.51	1607	0	211612	Ptchd1
19	36054750	36057550	2800	1969.75	1608	0	15566	Htr7
4	122022150	122028200	6050	1968.15	1609	0	666927	Gm12887
17	47831100	47836400	5300	1966.81	1610	0	17240	Mdfi
9	48643750	48651250	7500	1966.43	1611	0	235320	Zbtb16
5	35474850	35484900	10050	1965.06	1612	0	242939	Cpz
5	110542150	110547650	5500	1963.92	1613	0	231605	Galnt9
12	54067000	54069550	2550	1963.92	1614	0	27386	Npas3
4	132141000	132146600	5600	1963.44	1615	0	18386	Oprd1
8	120733200	120739700	6500	1963.27	1616	0	15900	Irf8
14	34218150	34223850	5700	1963.22	1617	0	319508	Syt15
11	100957750	100960700	2950	1962.42	1618	0	19285	Cavin1
2	132875050	132880200	5150	1960.35	1619	0	320974	Lrrn4
12	112719800	112726100	6300	1957.62	1620	0	217882	Cep170b
6	121208900	121213300	4400	1957.12	1621	0	53857	Tuba8
7	101009450	101013750	4300	1957.12	1622	0	18442	P2ry2
11	71749600	71753200	3600	1957.12	1623	0	216881	Wscd1
X	53973300	53977900	4600	1955.41	1624	0	22441	Xlr
19	38096800	38099750	2950	1949.5	1625	0	107221	Ffar4
12	109525650	109529100	3450	1948	1626	0	17263	Meg3
10	58811450	58815050	3600	1947.86	1627	0	237353	Sh3rf3
7	132652200	132660100	7900	1945.5	1628	0	76429	Lhpp
5	100844600	100847500	2900	1943.53	1629	0	231510	Gpat3
9	102502650	102508850	6200	1943.46	1630	0	16716	Ky
4	148126650	148132900	6250	1943.29	1631	0	71890	Mad2l2
13	49245700	49248850	3150	1942.97	1632	0	66329	Susd3
15	31293800	31299600	5800	1942.7	1633	0	67434	Ankrd33b
19	5744950	5752700	7750	1942.55	1634	0	16998	Ltbp3
13	72119950	72124750	4800	1938.06	1635	0	16371	Irx1
11	116692500	116697850	5350	1935.24	1636	0	20446	St6galnac2
11	57769350	57778150	8800	1934.66	1637	0	171212	Galnt10
18	31963350	31972400	9050	1931.66	1638	0	17922	Myo7b
2	13792000	13795050	3050	1931.08	1639	0	241230	St8sia6
10	41069250	41072800	3550	1929.94	1640	0	140741	Gpr6
12	3234000	3241200	7200	1929.74	1641	0	74173	Rab10os
6	54325400	54329650	4250	1929.02	1642	0	78004	Prr15
6	88841450	88844750	3300	1925.97	1643	0	80283	Abtb1
9	35328950	35335600	6650	1925.93	1644	0	71133	4933422A05Rik
6	126737350	126741050	3700	1925.54	1645	0	16494	Kcna6
16	92497650	92500100	2450	1925.52	1646	0	209195	Clic6
15	79801500	79804500	3000	1925.25	1647	0	73340	Nptxr
9	87143700	87146100	2400	1924.08	1648	0	244958	Mrap2
11	72263000	72268350	5350	1923.15	1649	0	73366	1700051A21Rik
4	133245950	133252800	6850	1922.74	1650	0	53608	Map3k6
19	46760600	46765250	4650	1921.99	1651	0	94219	Cnnm2
17	56895650	56903900	8250	1921.35	1652	0	64144	Mllt1
5	135887450	135891050	3600	1919.41	1653	0	15507	Hspb1
17	34185200	34188750	3550	1918.34	1654	0	21354	Tap1
10	127724450	127732150	7700	1917.34	1655	0	21334	Tac2
17	8523100	8528150	5050	1916.04	1656	0	23984	Pde10a
6	114396850	114401000	4150	1915.67	1657	0	15465	Hrh1
8	119989800	119994750	4950	1915.55	1658	0	78892	Crispld2
16	91138150	91141750	3600	1914.87	1659	0	74387	4932438H23Rik
7	45782900	45791600	8700	1914.65	1660	0	545963	Gm5897
16	60604350	60607600	3250	1914.38	1661	0	13840	Epha6
15	102354750	102359700	4950	1912.31	1662	0	170574	Sp7
10	77414000	77419750	5750	1909.5	1663	0	110532	Adarb1
14	118919400	118926050	6650	1908.03	1664	0	66573	Dzip1
15	84446900	84454950	8050	1908.03	1665	0	72301	Shisal1
8	71375800	71383200	7400	1904.78	1666	0	77090	Ocel1
2	27714150	27720300	6150	1904.22	1667	0	20181	Rxra
10	60105300	60109250	3950	1904.05	1668	0	94214	Spock2
7	141213200	141219550	6350	1902.76	1669	0	72000	Lmntd2
15	87544250	87546750	2500	1902.76	1670	0	106014	Tafa5
10	51676150	51679000	2850	1902.76	1671	0	320995	Rfx6
18	56923850	56927450	3600	1902.03	1672	0	320253	Marchf3
6	28978500	28983450	4950	1898.1	1673	0	387237	Mir129-1
14	8316300	8320150	3850	1897.7	1674	0	268709	Fam107a
8	50914650	50919550	4900	1897.42	1675	0	100039954	Gm2516
13	35966300	35970800	4500	1896.92	1676	0	76487	Ppp1r3g
16	6959450	6967000	7550	1896.78	1677	0	268859	Rbfox1
2	164934850	164941100	6250	1896.68	1678	0	17395	Mmp9
16	96275900	96281900	6000	1895.98	1679	0	93961	B3galt5
7	44949250	44953550	4300	1895.96	1680	0	22116	Tsks
19	50674000	50679650	5650	1895.96	1681	0	58178	Sorcs1
9	67830400	67833700	3300	1895.86	1682	0	244911	C2cd4a
7	84084900	84088100	3200	1893.3	1683	0	80982	Cemip
8	113845700	113851150	5450	1889.17	1684	0	208936	Adamts18
17	36188550	36191400	2850	1889	1685	0	15043	H2-T3
10	44455550	44459950	4400	1887.57	1686	0	12142	Prdm1
4	101291550	101295050	3500	1887.28	1687	0	16451	Jak1
10	43019600	43023600	4000	1886.69	1688	0	109205	Sobp
19	4098850	4103250	4400	1886.2	1689	0	52004	Cdk2ap2
6	83747500	83755750	8250	1886.08	1690	0	110935	Atp6v1b1
X	133684100	133688400	4300	1885.74	1691	0	279653	Pcdh19
1	153184900	153188900	4000	1885.4	1692	0	16782	Lamc2
2	155771600	155775300	3700	1885.02	1693	0	17391	Mmp24
4	154950250	154955350	5100	1884.21	1694	0	15208	Hes5
15	81692700	81695450	2750	1882.78	1695	0	214685	Chadl
15	98848800	98858450	9650	1881.73	1696	0	381022	Kmt2d
5	33101650	33106100	4450	1881.62	1697	0	20537	Slc5a1
3	141464650	141468500	3850	1880.98	1698	0	22253	Unc5c
19	61224250	61227850	3600	1879.91	1699	0	12982	Csf2ra
11	118510500	118515300	4800	1875.78	1700	0	52897	Rbfox3
5	37963000	37968300	5300	1874.66	1701	0	102637176	Gm20052
12	113259300	113265650	6350	1874.3	1702	0	69195	Tmem121
5	113286750	113291000	4250	1873.44	1703	0	52850	Sgsm1
17	8387350	8391600	4250	1868.48	1704	0	21331	T2
9	89867350	89872000	4650	1867.69	1705	0	74700	4930524O08Rik
14	72530200	72534150	3950	1866.84	1706	0	319448	Fndc3a
8	71523650	71527500	3850	1864.74	1707	0	619297	Ccdc194
15	78407500	78412050	4550	1864.35	1708	0	246221	Mpst
7	4469450	4474350	4900	1863.68	1709	0	67425	Eps8l1
11	96859900	96864500	4600	1863.33	1710	0	56358	Copz2
7	129253800	129258650	4850	1861.99	1711	0	381925	Plpp4
15	43168200	43171300	3100	1861.99	1712	0	239405	Rspo2
10	88884550	88888100	3550	1861.99	1713	0	216225	Slc5a8
10	36505900	36510000	4100	1861.65	1714	0	319415	Hs3st5
14	63581950	63588350	6400	1859.44	1715	0	219149	Xkr6
2	173169200	173176150	6950	1858.21	1716	0	18534	Pck1
19	38477250	38483600	6350	1857.06	1717	0	74055	Plce1
17	46296100	46299450	3350	1856.75	1718	0	106565	Dlk2
5	31071700	31079550	7850	1854.19	1719	0	69719	Cad
7	144625800	144632900	7100	1853.2	1720	0	101772	Ano1
5	113135850	113141600	5750	1852.76	1721	0	243219	2900026A02Rik
11	94880050	94885400	5350	1852.34	1722	0	12842	Col1a1
1	121525950	121529400	3450	1848.72	1723	0	15564	Htr5b
2	181311200	181316600	5400	1847.66	1724	0	20262	Stmn3
8	83662500	83670950	8450	1847.24	1725	0	67903	Gipc1
8	71601200	71605800	4600	1846.71	1726	0	100037278	Niban3
7	19063750	19067800	4050	1846.63	1727	0	83434	Rsph6a
8	10925550	10929800	4250	1846.49	1728	0	665306	3930402G23Rik
5	122949750	122953450	3700	1843.25	1729	0	30841	Kdm2b
2	55434750	55439200	4450	1843.11	1730	0	16519	Kcnj3
15	76666150	76670500	4350	1841.12	1731	0	16581	Kifc2
8	71460400	71466800	6400	1840.48	1732	0	94065	Mrpl34
1	91320700	91328850	8150	1840.22	1733	0	50880	Scly
1	78308550	78312300	3750	1840.12	1734	0	433323	Sgpp2
19	34473300	34478250	4950	1839.78	1735	0	12642	Ch25h
17	57145750	57151000	5250	1839.34	1736	0	21948	Cd70
2	152028050	152034050	6000	1838.27	1737	0	69698	Slc52a3
13	51840150	51846300	6150	1837.66	1738	0	23882	Gadd45g
5	24729350	24732750	3400	1835.94	1739	0	269633	Wdr86
4	98725100	98729350	4250	1834.8	1740	0	381591	L1td1
6	120460950	120465000	4050	1834.38	1741	0	16172	Il17ra
5	103692000	103694800	2800	1833.41	1742	0	17355	Aff1
12	85472050	85476750	4700	1833.14	1743	0	14281	Fos
2	25860850	25867900	7050	1833.05	1744	0	227632	Kcnt1
7	18990400	18994600	4200	1832.41	1745	0	232934	Mypop
3	87944450	87950850	6400	1831.47	1746	0	12904	Crabp2
14	57131400	57136200	4800	1829.54	1747	0	14623	Gjb6
11	117966200	117971350	5150	1827.09	1748	0	12702	Socs3
2	54435850	54439050	3200	1819.97	1749	0	271786	Galnt13
18	36064200	36070750	6550	1818.85	1750	0	100042150	Nrg2
7	28366150	28373550	7400	1818.73	1751	0	101497	Plekhg2
17	73708000	73712600	4600	1815.71	1752	0	71685	Galnt14
6	118064000	118069400	5400	1815.44	1753	0	70727	Rasgef1a
5	120618000	120624850	6850	1813.45	1754	0	71990	Ddx54
2	172787050	172791250	4200	1813.06	1755	0	12162	Bmp7
15	102254200	102259900	5700	1812.24	1756	0	19411	Rarg
17	37195700	37200000	4300	1812.21	1757	0	258219	Or2i1
9	23221650	23224650	3000	1811.02	1758	0	73230	Bmper
9	44132850	44137700	4850	1810.42	1759	0	84004	Mcam
8	95350800	95357900	7100	1809.91	1760	0	17388	Mmp15
9	117869750	117875200	5450	1809.68	1761	0	27215	Azi2
7	45678100	45685950	7850	1809.52	1762	0	56546	Sec1
7	6726650	6731450	4800	1806.18	1763	0	57775	Usp29
11	88190750	88195300	4550	1805.34	1764	0	103841	Cuedc1
15	85643950	85651450	7500	1804.22	1765	0	102800312	Lncppara
5	111418250	111422700	4450	1803.87	1766	0	433938	Mn1
5	81019100	81023650	4550	1800.83	1767	0	319387	Adgrl3
11	121154900	121158500	3600	1800.83	1768	0	217369	Uts2r
17	24656900	24660450	3550	1799.5	1769	0	381073	Npw
9	107546900	107554200	7300	1799.3	1770	0	56289	Rassf1
8	91992750	91998050	5300	1799.14	1771	0	16373	Irx3
15	92396400	92399300	2900	1798.07	1772	0	239618	Pdzrn4
8	121311200	121319050	7850	1797.5	1773	0	108148	Galnt2
11	83418300	83423300	5000	1797.09	1774	0	276952	Rasl10b
17	23641950	23645650	3700	1796.99	1775	0	240047	Mmp25
11	98385150	98390550	5400	1792.82	1776	0	320655	Pgap3
5	84414150	84418400	4250	1790.96	1777	0	13839	Epha5
2	131037450	131042550	5100	1790.85	1778	0	14588	Gfra4
17	56715650	56722950	7300	1790.82	1779	0	69875	Ndufa11
13	70839750	70844050	4300	1790.33	1780	0	271127	Adamts16
19	6530900	6533000	2100	1786.76	1781	0	18190	Nrxn2
9	119570250	119574050	3800	1786.59	1782	0	20271	Scn5a
15	101436200	101440500	4300	1786.54	1783	0	406219	Krt87
2	165211400	165214550	3150	1786.35	1784	0	104010	Cdh22
8	84197350	84202900	5550	1783.63	1785	0	387216	Mir23a
2	153029950	153033850	3900	1781.73	1786	0	228787	Xkr7
10	64087500	64090400	2900	1780.66	1787	0	216033	Ctnna3
7	36677200	36682000	4800	1780.44	1788	0	243931	Tshz3
17	36204200	36207600	3400	1780.44	1789	0	15043	H2-T3
8	70161850	70168100	6250	1780.07	1790	0	17259	Mef2b
11	5859750	5864300	4550	1779.74	1791	0	11568	Aebp1
7	97328100	97333150	5050	1779.62	1792	0	622320	Kctd21
13	23283800	23287700	3900	1778.66	1793	0	75322	4930557F10Rik
19	4212900	4217500	4600	1777.35	1794	0	56708	Clcf1
10	80897700	80903850	6150	1774.41	1795	0	432478	Tmprss9
9	20743050	20746300	3250	1774.37	1796	0	244723	Olfm2
15	79929050	79934550	5500	1773.93	1797	0	52609	Cbx7
1	128590200	128596250	6050	1773.64	1798	0	12767	Cxcr4
17	47465950	47470250	4300	1773.64	1799	0	224833	AI661453
10	70242800	70246750	3950	1773.13	1800	0	66859	Slc16a9
15	102002450	102008200	5750	1772.35	1801	0	16691	Krt8
13	92129800	92134800	5000	1772.34	1802	0	19418	Rasgrf2
8	66695100	66699650	4550	1772.28	1803	0	18166	Npy1r
19	24998450	25003350	4900	1772.18	1804	0	76088	Dock8
8	118282500	118288400	5900	1769.92	1805	0	12554	Cdh13
5	139353150	139359550	6400	1769.8	1806	0	545817	Cyp2w1
19	3411300	3416200	4900	1767.7	1807	0	14419	Gal
1	34455000	34461250	6250	1764.95	1808	0	19253	Ptpn18
12	112908950	112915500	6550	1764.52	1809	0	16450	Jag2
7	27393800	27399300	5500	1759.7	1810	0	80297	Sptbn4
8	122633250	122642900	9650	1759.47	1811	0	12398	Cbfa2t3
10	80256000	80262200	6200	1758.71	1812	0	75406	Ndufs7
7	140080050	140083500	3450	1758.57	1813	0	68566	Caly
8	91851550	91857050	5500	1755.31	1814	0	16373	Irx3
11	61340800	61343400	2600	1752.41	1815	0	67473	Slc47a1
2	21367300	21369850	2550	1752.27	1816	0	241263	Gpr158
1	135082850	135088100	5250	1752.14	1817	0	329252	Lgr6
4	114647150	114652300	5150	1751.54	1818	0	666048	Trabd2b
9	65388600	65394450	5850	1751.29	1819	0	74492	Kbtbd13
6	136660000	136663250	3250	1750.98	1820	0	66857	Plbd1
8	120275050	120280100	5050	1750.13	1821	0	382034	Gse1
7	140844500	140852900	8400	1749.66	1822	0	78520	C330022C24Rik
12	40132400	40136200	3800	1749.18	1823	0	20259	Scin
2	164885700	164893050	7350	1748.47	1824	0	329559	Zfp335
11	101244050	101248600	4550	1748.24	1825	0	54409	Ramp2
11	117197350	117202150	4800	1747.57	1826	0	53860	Septin9
11	33840150	33845500	5350	1746.22	1827	0	70357	Kcnip1
9	51764100	51768500	4400	1744	1828	0	244867	Arhgap20
2	49785250	49790850	5600	1739.67	1829	0	71897	Lypd6b
16	30279500	30286950	7450	1739.67	1830	0	74488	Lrrc15
15	81775350	81784150	8800	1739.67	1831	0	20286	Zc3h7b
12	112945600	112953800	8200	1738.78	1832	0	66174	Nudt14
1	180330200	180335850	5650	1738.2	1833	0	320404	Itpkb
1	86666650	86671950	5300	1737.75	1834	0	18159	Nppc
17	35423850	35426400	2550	1732.43	1835	0	15019	H2-Q8
17	87635550	87639850	4300	1732.05	1836	0	17075	Epcam
9	107732650	107740350	7700	1731.8	1837	0	83486	Rbm5
17	57272250	57277600	5350	1731.75	1838	0	22324	Vav1
14	70530100	70536450	6350	1730.58	1839	0	213469	Lgi3
11	28580650	28584700	4050	1730.3	1840	0	216613	Ccdc85a
4	146491450	146494600	3150	1729.81	1841	0	100041433	Zfp981
10	80701450	80706650	5200	1729.74	1842	0	71564	Izumo4
8	71627450	71632400	4950	1729.68	1843	0	382018	Unc13a
1	86017650	86020750	3100	1728.62	1844	0	70060	Spata3
4	154100600	154107000	6400	1728.45	1845	0	22062	Trp73
2	38666800	38675250	8450	1726.8	1846	0	26423	Nr5a1
5	37087450	37092950	5500	1725.5	1847	0	76071	Jakmip1
13	119596150	119598350	2200	1725.39	1848	0	633640	Tmem267
17	72602050	72606100	4050	1724.6	1849	0	11682	Alk
5	24494500	24502350	7850	1724.09	1850	0	213990	Agap3
12	16651900	16656450	4550	1724	1851	0	18217	Ntsr2
4	97750700	97755550	4850	1723.29	1852	0	319865	E130114P18Rik
2	179870550	179877450	6900	1722.4	1853	0	12561	Cdh4
19	4712100	4716350	4250	1722.35	1854	0	20743	Sptbn2
8	122230400	122236100	5700	1721.93	1855	0	108148	Galnt2
5	22745400	22748550	3150	1721.71	1856	0	330052	A930003O13Rik
3	98426950	98429550	2600	1720.91	1857	0	242109	Zfp697
6	17305600	17308400	2800	1719.28	1858	0	12389	Cav1
9	31462650	31466000	3350	1719.28	1859	0	235135	Tmem45b
5	110339200	110345500	6300	1718.68	1860	0	381667	Lrcol1
16	94326900	94330950	4050	1718.41	1861	0	170765	Ripply3
6	29211750	29216900	5150	1716.97	1862	0	23917	Impdh1
17	90453750	90456700	2950	1712.43	1863	0	18189	Nrxn1
2	164855600	164861100	5500	1712.25	1864	0	18830	Pltp
17	45870850	45877300	6450	1711.77	1865	0	75154	4930542M03Rik
2	168549350	168557250	7900	1711.75	1866	0	18019	Nfatc2
12	116398850	116406350	7500	1710.95	1867	0	76044	Ncapg2
17	36987350	36990150	2800	1708.56	1868	0	240095	H2-M5
10	80805500	80811350	5850	1708.49	1869	0	71912	Jsrp1
7	99380050	99384850	4800	1706.18	1870	0	233552	Gdpd5
13	37823600	37828700	5100	1705.08	1871	0	68750	Rreb1
5	139656750	139661700	4950	1703.75	1872	0	231830	Micall2
2	180527000	180533050	6050	1703.24	1873	0	18216	Ntsr1
6	122741250	122745800	4550	1702.32	1874	0	20527	Slc2a3
8	4203750	4208950	5200	1700.66	1875	0	213027	Evi5l
1	172324500	172330600	6100	1699.49	1876	0	16524	Kcnj9
6	85124400	85128600	4200	1698.89	1877	0	20751	Spr
4	129103800	129109200	5400	1698.89	1878	0	66260	Tmem54
1	133361000	133367150	6150	1698.89	1879	0	214253	Etnk2
17	46441600	46446550	4950	1697.26	1880	0	106763	Ttbk1
11	115162400	115166250	3850	1696.04	1881	0	26941	Nherf1
2	25428300	25434900	6600	1695.99	1882	0	11305	Abca2
8	12210250	12215900	5650	1694.63	1883	0	434280	Sox1ot
5	137149500	137153550	4050	1694.44	1884	0	666339	Muc17
15	103313400	103319350	5950	1692.2	1885	0	29813	Zfp385a
18	16806500	16810200	3700	1692.1	1886	0	12558	Cdh2
4	102086300	102089100	2800	1690.99	1887	0	18578	Pde4b
1	12988700	12993500	4800	1690.64	1888	0	240726	Slco5a1
7	142427550	142436050	8500	1688.72	1889	0	55925	Syt8
4	154329750	154337800	8050	1686.22	1890	0	70673	Prdm16
7	35162850	35170050	7200	1685.34	1891	0	53896	Slc7a10
13	42300650	42304600	3950	1683.94	1892	0	13614	Edn1
13	94572000	94577650	5650	1683.09	1893	0	11774	Ap3b1
12	113186100	113191200	5100	1681.14	1894	0	69195	Tmem121
1	135581650	135587600	5950	1681.07	1895	0	215714	Gm4793
14	65421550	65425900	4350	1680.93	1896	0	18155	Pnoc
2	102656200	102660900	4700	1680.92	1897	0	20511	Slc1a2
11	35119800	35123150	3350	1680.85	1898	0	20564	Slit3
19	6977500	6981250	3750	1678.85	1899	0	14227	Fkbp2
9	123923100	123928950	5850	1678.51	1900	0	12768	Ccr1
4	147399450	147402850	3400	1678.28	1901	0	195531	Zfp982
17	46254900	46261550	6650	1678.2	1902	0	74094	Tjap1
8	120113100	120116500	3400	1674.02	1903	0	234797	6430548M08Rik
10	107270450	107275000	4550	1673.49	1904	0	108030	Lin7a
7	25672900	25677500	4600	1673.46	1905	0	320208	Tmem91
7	139184450	139189600	5150	1671.71	1906	0	57740	Stk32c
2	160577900	160582150	4250	1671.71	1907	0	21969	Top1
11	98934500	98941600	7100	1670.93	1908	0	19401	Rara
8	13491200	13495200	4000	1669.71	1909	0	14456	Gas6
11	5995400	6001750	6350	1669.67	1910	0	12323	Camk2b
19	10052750	10060500	7750	1669.28	1911	0	60527	Fads3
15	39196300	39197600	1300	1669.25	1912	0	116838	Rims2
1	189726350	189731800	5450	1668.19	1913	0	19250	Ptpn14
8	11554400	11558550	4150	1667.12	1914	0	26356	Ing1
5	39640800	39645650	4850	1665.9	1915	0	15476	Hs3st1
9	121774750	121779350	4600	1664.91	1916	0	72330	Klhl40
5	108548100	108551650	3550	1664.74	1917	0	12889	Cplx1
13	49144750	49148500	3750	1664.3	1918	0	75607	Wnk2
11	33143250	33148800	5550	1658.66	1919	0	14172	Fgf18
17	47435800	47438850	3050	1658.61	1920	0	75462	Cimip3
1	133180450	133184100	3650	1658.12	1921	0	240753	Plekha6
15	48791150	48794350	3200	1658.1	1922	0	239420	Csmd3
12	79130300	79133400	3100	1658.03	1923	0	11847	Arg2
10	79970250	79975550	5300	1656.54	1924	0	216157	Tmem259
1	192190900	192195950	5050	1655.33	1925	0	16510	Kcnh1
5	24424750	24431300	6550	1654.82	1926	0	20535	Slc4a2
9	108111150	108117200	6050	1653.65	1927	0	12217	Bsn
13	55377150	55380450	3300	1652.55	1928	0	51791	Rgs14
1	132066200	132069850	3650	1651.32	1929	0	213006	Mfsd4a
16	94995450	94999950	4500	1651.32	1930	0	16522	Kcnj6
14	19750200	19754350	4150	1651.32	1931	0	18074	Nid2
4	101495200	101498200	3000	1650.93	1932	0	72685	Dnajc6
9	30920500	30923400	2900	1650.42	1933	0	235130	Adamts15
2	180383000	180387750	4750	1650.1	1934	0	320485	B230312C02Rik
7	28628050	28632400	4350	1649.61	1935	0	101744	Acp7
1	104768150	104772100	3950	1649.39	1936	0	23836	Cdh20
7	19808150	19812300	4150	1649.25	1937	0	12051	Bcl3
10	40136200	40142500	6300	1649.08	1938	0	72472	Slc16a10
17	29093150	29096050	2900	1648.67	1939	0	12575	Cdkn1a
12	106171900	106178700	6800	1648.64	1940	0	22367	Vrk1
7	65155550	65159800	4250	1646.5	1941	0	70638	Entrep2
7	45359750	45363300	3550	1644.7	1942	0	76787	Ppfia3
5	36897300	36906850	9550	1644.53	1943	0	269643	Ppp2r2c
15	54569500	54573700	4200	1642.88	1944	0	105853	Mal2
10	7866500	7870250	3750	1642.74	1945	0	237256	Zc3h12d
3	102467250	102472550	5300	1641.5	1946	0	18049	Ngf
10	60804700	60810350	5650	1640.74	1947	0	107449	Unc5b
4	120665550	120669050	3500	1640.11	1948	0	56222	Cited4
1	152399600	152403000	3400	1637.99	1949	0	269132	Colgalt2
12	29532950	29536050	3100	1637.85	1950	0	17933	Myt1l
11	47985100	47989750	4650	1637.8	1951	0	24052	Sgcd
17	3324750	3329100	4350	1637.48	1952	0	24001	Tiam2
5	120277800	120283100	5300	1636.93	1953	0	74111	Rbm19
6	136170550	136173150	2600	1636.51	1954	0	14812	Grin2b
1	74120100	74126000	5900	1636.32	1955	0	435626	Rufy4
8	119697550	119703200	5650	1635.76	1956	0	69047	Atp2c2
9	54064950	54069950	5000	1635.37	1957	0	244882	Tnfaip8l3
9	22097600	22102400	4800	1632.99	1958	0	12797	Cnn1
7	126845700	126850400	4700	1632.4	1959	0	13446	Doc2a
4	136461000	136465750	4750	1631.07	1960	0	269593	Luzp1
6	24953150	24957600	4450	1630.94	1961	0	319832	Tmem229a
4	136930100	136938100	8000	1630.94	1962	0	13842	Epha8
11	115973050	115977300	4250	1629.75	1963	0	192897	Itgb4
15	73702600	73709500	6900	1629.54	1964	0	239530	Gpr20
4	13742700	13746050	3350	1629.51	1965	0	12395	Runx1t1
6	97058650	97061500	2850	1629.24	1966	0	320701	Tafa4
1	59481350	59485600	4250	1628.68	1967	0	14369	Fzd7
9	110943950	110948500	4550	1626.94	1968	0	21667	Cripto
11	76995200	76998700	3500	1626.59	1969	0	15567	Slc6a4
12	112224700	112233150	8450	1624.43	1970	0	668303	Kif26a
7	96209700	96214950	5250	1622.68	1971	0	23966	Tenm4
11	113194750	113202200	7450	1621.95	1972	0	72386	2610035D17Rik
15	102142850	102146150	3300	1621.29	1973	0	16012	Igfbp6
3	131487000	131492500	5500	1621.1	1974	0	74442	Sgms2
5	36020250	36028150	7900	1618.55	1975	0	81840	Sorcs2
11	77513500	77517400	3900	1618.02	1976	0	67477	Abhd15
X	36327600	36331800	4200	1618.01	1977	0	74365	Lonrf3
18	60620500	60626750	6250	1617.35	1978	0	104027	Synpo
11	70349150	70354550	5400	1617.24	1979	0	11687	Alox15
9	106146500	106150800	4300	1616.09	1980	0	235582	Glyctk
6	82401050	82405000	3950	1615.07	1981	0	21336	Tacr1
9	107598950	107605200	6250	1614.42	1982	0	20347	Sema3b
19	28834250	28837400	3150	1613.96	1983	0	20510	Slc1a1
7	118989550	118997300	7750	1609.39	1984	0	64297	Gprc5b
9	58488150	58492600	4450	1608.88	1985	0	319477	Insyn1
5	30620450	30623550	3100	1605.32	1986	0	16527	Kcnk3
9	108960000	108968100	8100	1605.11	1987	0	12836	Col7a1
14	108910550	108914600	4050	1604.98	1988	0	76965	Slitrk1
3	89276750	89282400	5650	1604.52	1989	0	13636	Efna1
3	95733450	95742250	8800	1603.57	1990	0	71807	Tars2
19	23891800	23895450	3650	1603.19	1991	0	319924	Apba1
17	56775550	56781450	5900	1601.51	1992	0	19725	Rfx2
3	80799850	80803450	3600	1600.85	1993	0	14800	Gria2
4	152339250	152342150	2900	1598.4	1994	0	269610	Chd5
2	24404900	24411950	7050	1597.5	1995	0	215632	Psd4
4	4136550	4140700	4150	1596.89	1996	0	18619	Penk
14	34892000	34898700	6700	1596.62	1997	0	723847	Mir346
2	118756700	118762900	6200	1596.35	1998	0	214239	Ccdc9b
[truncated: 604 more rows]
