# Supplementary material for: Eed controls craniofacial osteoblast differentiation and mesenchymal proliferation from the neural crest
Source: eLife. 2025 Dec 2;13:RP100159. doi: 10.7554/eLife.100159 (PMC12671911; doi:10.7554/eLife.100159)
Supplement: Supplementary file 9. [file elife-100159-supp9.xlsx]

## Sheet: Supplementary_File_9
Supplementary File 9. Methylation rank and nearest gene coordinates from CUT&Tag H3K27me3 sequencing of E16.5 Sox10-Cre; EedFl/WT craniofacial tissues.
Chromosome	START	STOP	CONSTITUENT_SIZE	E16.5_WT_merged.bam	Methylation rank	Is past inflection point	nearestEntrez	nearestGene
17	39841150	39851150	10000	656072	1	1	100861531	Rn45s
6	52146000	52298050	152050	549246	2	1	791364	Hottip
15	102898200	103073900	175700	533088	3	1	751557	Mir615
11	96237150	96377750	140600	454737	4	1	75395	Hoxb5os
2	74641750	74770300	128550	419813	5	1	73429	Hoxd3os1
7	79484850	79624050	139200	237310	6	1	723968	Mir9-3
5	147259500	147325450	65950	174966	7	1	70147	Plut
14	63227000	63279400	52400	172149	8	1	14463	Gata4
11	3125950	3200700	74750	172031	9	1	78887	Sfi1
5	28116100	28188000	71900	169800	10	1	13799	En2
5	119791050	119857800	66750	168357	11	1	21388	Tbx5
5	35357100	35411800	54700	156956	12	1	74429	4930478P22Rik
2	105646700	105694700	48000	154232	13	1	402728	Pax6os1
6	83683250	83731850	48600	147985	14	1	574519	Vax2os
3	88185950	88258550	72600	147312	15	1	58176	Rhbg
9	91346650	91412600	65950	146311	16	1	22774	Zic4
4	115927150	115985450	58300	142095	17	1	14073	Faah
19	45218950	45254800	35850	140950	18	1	16814	Lbx1
1	89914000	89955400	41400	139622	19	1	208372	Asb18
17	36139600	36241450	101850	139042	20	1	69717	Gm10499
8	12372500	12413000	40500	136698	21	1	434280	Sox1ot
15	98771050	98811100	40050	135078	22	1	22410	Wnt10b
19	45124600	45170000	45400	133821	23	1	21908	Tlx1
8	57306200	57357950	51750	131229	24	1	75996	Hdnr
8	121056050	121094900	38850	129612	25	1	68790	Fendrr
17	85604100	85638450	34350	128885	26	1	20473	Six3
5	139527400	139567750	40350	125396	27	1	74973	4930500L23Rik
5	106436100	106477050	40950	125305	28	1	104382	Barhl2
14	122444700	122497250	52550	124978	29	1	69248	2610035F20Rik
2	38330600	38381050	50450	123975	30	1	16870	Lhx2
1	120589850	120631250	41400	122722	31	1	13798	En1
13	40695950	40751400	55450	120654	32	1	21418	Tfap2a
16	94072500	94102450	29950	120134	33	1	20465	Sim2
2	148017150	148062550	45400	119725	34	1	15376	Foxa2
7	131533750	131561700	27950	119527	35	1	15373	Hmx3
3	129190500	129229200	38700	119473	36	1	18741	Pitx2
16	91210800	91248900	38100	117865	37	1	50913	Olig2
11	119031800	119066100	34300	116474	38	1	30951	Cbx8
2	71519350	71555500	36150	113954	39	1	66559	Metap1d
4	114882750	114936350	53600	113894	40	1	30923	Foxe3
9	63132050	63162250	30200	112966	41	1	207667	Skor1
10	42561900	42598350	36450	112168	42	1	21907	Nr2e1
9	74837550	74875450	37900	112059	43	1	15379	Onecut1
4	135132850	135181700	48850	111350	44	1	12399	Runx3
2	9868800	9904800	36000	109923	45	1	77682	Gata3un
2	31628950	31662500	33550	109351	46	1	381359	Prdm12
5	29462300	29494950	32650	109010	47	1	15285	Mnx1
6	6842050	6887050	45000	108788	48	1	320038	Dlx6os1
4	139803700	139843650	39950	108006	49	1	18509	Pax7
10	80475950	80504550	28600	107839	50	1	246086	Onecut3
3	34635650	34678300	42650	105499	51	1	320478	Sox2ot
5	120391650	120441350	49700	104900	52	1	16873	Lhx5
17	26831650	26866150	34500	104863	53	1	18091	Nkx2-5
13	31606600	31633100	26500	103950	54	1	71307	1700018A04Rik
11	84512300	84543350	31050	103482	55	1	78365	Lhx1os
13	55815200	55861650	46450	103313	56	1	18740	Pitx1
1	155717050	155755300	38250	103264	57	1	16872	Lhx4
5	41741700	41772150	30450	102483	58	1	12020	Nkx3-2
4	89264550	89316800	52250	101644	59	1	12579	Cdkn2b
6	83053100	83100200	47100	101156	60	1	93838	Dqx1
1	184704800	184737900	33100	100320	61	1	74971	4930488B22Rik
4	109969400	109990700	21300	100302	62	1	242620	Dmrta2
12	56516400	56549050	32650	100048	63	1	21869	Nkx2-1
7	24926750	24960500	33750	99579.6	64	1	232974	Erfl
6	88185550	88210900	25350	98811.4	65	1	14461	Gata2
2	147172900	147201700	28800	97994.7	66	1	78068	6430503K07Rik
11	98306500	98338950	32450	97803	67	1	18013	Neurod2
19	37680600	37707550	26950	95650.7	68	1	546726	Cyp26c1
1	42681550	42721400	39850	95263.7	69	1	66620	Pantr2
18	64322800	64352650	29850	95105.5	70	1	73588	St8sia3os
12	57526750	57558050	31300	95036	71	1	15375	Foxa1
1	78163050	78222550	59500	94039.1	72	1	18505	Pax3
13	72619300	72652750	33450	93343	73	1	328287	Gm20554
2	105109950	105145000	35050	93288.5	74	1	329480	Wt1os
2	36080250	36112800	32550	92757	75	1	16874	Lhx6
7	70317550	70361250	43700	92059.6	76	1	624549	Gm29683
4	44693850	44721950	28100	91780.3	77	1	70602	5730488B01Rik
8	69872250	69893450	21200	91053.5	78	1	80720	Pbx4
14	48647400	48679350	31950	89981.4	79	1	606497	Otx2os1
3	87989550	88040350	50800	89831.6	80	1	73940	Hapln2
6	85177800	85201500	23700	89451.8	81	1	13796	Emx1
12	56673850	56706600	32750	87746.4	82	1	18511	Pax9
9	98948750	98978550	29800	87603.1	83	1	768252	Foxl2os
11	57822300	57848050	25750	87200.8	84	1	15110	Hand1
2	165180050	165246850	66800	86468.5	85	1	104010	Cdh22
7	137295400	137337150	41750	85656.8	86	1	13593	Ebf3
5	75065700	75088950	23250	85382.1	87	1	14843	Gsx2
13	48649650	48677300	27650	85057.1	88	1	12022	Barx1
7	45161600	45192700	31100	84949.4	89	1	72961	Slc17a7
13	94865450	94900050	34600	84848.8	90	1	18420	Otp
2	28903700	28927350	23650	84221.3	91	1	54422	Barhl1
13	73253600	73278550	24950	84221.3	92	1	50916	Irx4
5	101640900	101671250	30350	83458.1	93	1	18096	Nkx6-1
15	75991200	76016550	25350	83116.3	94	1	432964	Iqank1
1	74876400	74909050	32650	82713.1	95	1	723900	Mir375
14	12331950	12360100	28150	82648.1	96	1	54713	Fezf2
19	59444950	59483450	38500	81895.4	97	1	329078	Emx2os
11	85877400	85906150	28750	81695.6	98	1	21387	Tbx4
19	44636900	44707250	70350	81674.5	99	1	102465114	Mir3084-2
5	98163350	98194900	31550	81550.2	100	1	77630	Prdm8
10	50886850	50915000	28150	81277.6	101	1	20464	Sim1
2	147349900	147378900	29000	80877.9	102	1	99041	AI646519
5	107711100	107736150	25050	80763.5	103	1	14581	Gfi1
9	69745750	69783900	38150	80278.2	104	1	64290	Foxb1
9	99860450	99882800	22350	80003.8	105	1	20669	Sox14
4	22474150	22502300	28150	79604.3	106	1	18992	Pou3f2
4	115046650	115070700	24050	79339.3	107	1	21349	Tal1
2	158597250	158622600	25350	79260.4	108	1	22348	Slc32a1
3	99231050	99269350	38300	78969.9	109	1	70560	Wars2
10	19347150	19368550	21400	78183.7	110	1	94222	Olig3
2	19424100	19459550	35450	77080.2	111	1	19213	Ptf1a
11	21982100	22009350	27250	77007.5	112	1	216565	Ehbp1
5	33423950	33447300	23350	76486.5	113	1	672284	Nkx1-1
13	78167350	78214700	47350	76135.3	114	1	320174	A830082K12Rik
13	71947300	71970950	23650	75340.9	115	1	16371	Irx1
6	23237950	23267450	29500	74372.8	116	1	73191	Fezf1
16	18576350	18592450	16100	74298.2	117	1	21380	Tbx1
13	83708300	83743300	35000	74080.9	118	1	723967	Mir9-2
15	99576000	99616650	40650	74026.3	119	1	11831	Aqp6
2	26190450	26209100	18650	74006.3	120	1	227638	Qsox2
5	67208550	67238450	29900	73825.4	121	1	67878	Tmem33
9	24763350	24784350	21000	73627.8	122	1	57246	Tbx20
7	139576050	139597950	21900	73355.2	123	1	212111	Inpp5a
1	138831750	138853100	21350	73207.6	124	1	69549	2310009B15Rik
2	122287950	122321350	33400	72578.3	125	1	99439	Duox1
3	127620450	127654400	33950	72562.4	126	1	11924	Neurog2
4	21664800	21698650	33850	72065.1	127	1	230025	Prdm13
5	119647450	119694650	47200	71948	128	1	433944	Tbx3os2
18	53454900	53482150	27250	71728.2	129	1	225518	Prdm6
18	11043700	11063950	20250	71029.3	130	1	68434	Gata6os
4	46330100	46358650	28550	70862.3	131	1	110805	Foxe1
4	152112100	152136600	24500	70647.8	132	1	85030	Tnfrsf25
17	85450100	85496800	46700	70078.4	133	1	73582	Camkmt
6	30160850	30186550	25700	69936.2	134	1	723886	Mir96
1	87143700	87175000	31300	69866.4	135	1	13599	Ecel1
19	16866000	16884000	18000	69175.9	136	1	14240	Foxb2
12	49371850	49406400	34550	68739.3	137	1	67293	3110039M20Rik
4	99644300	99667450	23150	68667.1	138	1	15221	Foxd3
4	125468250	125503550	35300	68320.2	139	1	14807	Grik3
5	37811200	37839900	28700	68140.2	140	1	17701	Msx1
14	69162950	69197550	34600	67629.3	141	1	73554	1700092C10Rik
9	118465150	118494950	29800	67159	142	1	13813	Eomes
11	115305900	115343150	37250	67158.3	143	1	69602	Otop3
11	115240350	115271000	30650	67122.6	144	1	320534	Tmem104
14	67222750	67244200	21450	66995.4	145	1	13592	Ebf2
7	140042100	140073600	31500	66210.3	146	1	68566	Caly
11	97528100	97553450	25350	65832.5	147	1	56013	Srcin1
2	38692200	38721250	29050	65575.2	148	0	26423	Nr5a1
18	76841200	76866800	25600	65466	149	0	664805	Skor2
12	118833150	118858700	25550	64924	150	0	320145	Sp8
17	8423900	8445600	21700	64815	151	0	20997	T
3	87786400	87820400	34000	64801.6	152	0	73182	Pear1
9	58192750	58206350	13600	64703.8	153	0	665268	1600029O15Rik
19	59155750	59177550	21800	64506.1	154	0	22326	Vax1
18	80968450	80999450	31000	64329.6	155	0	20689	Sall3
1	63241100	63283650	42550	64300	156	0	73884	Zdbf2
10	22811250	22851050	39800	63972.5	157	0	21412	Tcf21
13	36717000	36740600	23600	63797.4	158	0	69955	Fars2
14	104453650	104477600	23950	63597.5	159	0	72486	Obi1
12	8296500	8322600	26100	62997.9	160	0	58240	Hs1bp3
13	112974950	113001400	26450	62828.9	161	0	622408	Mcidas
15	75727100	75750550	23450	62511.3	162	0	378435	Mafa
10	84749650	84767100	17450	62307.4	163	0	71137	Rfx4
17	85672900	85697050	24150	62271.1	164	0	20472	Six2
8	120872450	120908350	35900	62188.4	165	0	108148	Galnt2
4	148157850	148189700	31850	61840.8	166	0	230904	Fbxo2
1	19205150	19246300	41150	61762.3	167	0	21419	Tfap2b
2	118698900	118715700	16800	61651.7	168	0	383787	Ankrd63
9	55534450	55551350	16900	61326.2	169	0	244891	Scaper
1	56964550	56989950	25400	61121.5	170	0	329160	9130024F11Rik
19	45725250	45749850	24600	61108.1	171	0	18150	Npm3
2	70555650	70575150	19500	60980.9	172	0	68986	Gad1os
17	34654200	34686800	32600	60345	173	0	81877	Tnxb
18	42376450	42423400	46950	59745.3	174	0	18998	Pou4f3
7	44332000	44366600	34600	59490.9	175	0	69349	1700008O03Rik
2	73261050	73283000	21950	59454.6	176	0	381373	Sp9
14	118221150	118241800	20650	59436.4	177	0	223227	Sox21
13	116292050	116318450	26400	58764.1	178	0	16392	Isl1
10	80339250	80365500	26250	58328	179	0	66548	Adamtsl5
1	4486950	4504450	17500	58128.1	180	0	20671	Sox17
13	98342900	98377700	34800	57731.3	181	0	15229	Foxd1
14	32449900	32471200	21300	57474	182	0	20508	Slc18a3
11	68378100	68409350	31250	56639.9	183	0	18208	Ntn1
7	49626150	49648250	22100	56326	184	0	13172	Dbx1
1	74940450	74959350	18900	56130.4	185	0	16147	Ihh
9	40867050	40892750	25700	56128.9	186	0	244813	Bsx
8	105257250	105284000	26750	55835	187	0	78688	Nol3
2	172540300	172565150	24850	55784.1	188	0	21420	Tfap2c
3	107576650	107603150	26500	55002.8	189	0	11694	Alx3
2	61800400	61824050	23650	54621.2	190	0	21375	Tbr1
15	99080450	99102750	22300	54575.8	191	0	78733	Troap
X	58012650	58044300	31650	54221.4	192	0	22773	Zic3
1	136942950	136963650	20700	54142.1	193	0	26424	Nr5a2
11	85822150	85847900	25750	54057.9	194	0	69909	2610027K06Rik
1	190155850	190181150	25300	53967	195	0	19130	Prox1
11	119538450	119568200	29750	53785.3	196	0	18164	Nptx1
5	28457800	28474900	17100	53349.2	197	0	654796	9530036O11Rik
12	117144250	117167050	22800	53303.8	198	0	19276	Ptprn2
15	74507750	74540450	32700	52616.6	199	0	107831	Adgrb1
2	146825750	146843350	17600	52496.5	200	0	228730	Kiz
4	9840950	9863800	22850	52464.9	201	0	242316	Gdf6
14	63934150	63950650	16500	51943.1	202	0	20680	Sox7
18	65923300	65944050	20750	51712.3	203	0	19434	Rax
13	53459750	53479800	20050	51147	204	0	17702	Msx2
1	187600800	187613250	12450	51041.6	205	0	26381	Esrrg
2	160356300	160379400	23100	50968.9	206	0	16658	Mafb
12	56605800	56629450	23650	50787.2	207	0	18094	Nkx2-9
5	67087650	67112950	25300	50769	208	0	18935	Phox2b
13	31792000	31820500	28500	50648.9	209	0	218138	Gmds
7	70273350	70295800	22450	50569.1	210	0	624549	Gm29683
12	9565300	9589200	23900	50140.3	211	0	69420	1700022H16Rik
7	30449200	30471750	22550	49878.6	212	0	54631	Nphs1
19	25663250	25683850	20600	49569.7	213	0	226049	Dmrt2
12	110268450	110301100	32650	49515.2	214	0	353504	Dio3os
8	78417150	78446400	29250	49347.4	215	0	18997	Pou4f2
15	78709650	78727100	17450	49329.1	216	0	207393	Elfn2
5	139903100	139922100	19000	49060.9	217	0	243312	Elfn1
5	147180200	147201800	21600	49020.1	218	0	14842	Gsx1
X	93275600	93303850	28250	49003.1	219	0	11878	Arx
3	96388100	96415350	27250	48915.6	220	0	21748	Terc
5	135845000	135875800	30800	48606.7	221	0	58212	Srrm3
12	84562600	84580350	17750	48243.3	222	0	12677	Vsx2
8	87464400	87476300	11900	48219.1	223	0	12404	Cbln1
9	122561350	122574100	12750	48215.6	224	0	319626	9530059O14Rik
3	96321100	96345850	24750	48025.2	225	0	100504145	Platr30
10	22146250	22164000	17750	47990	226	0	667281	H60b
7	49900300	49921900	21600	47832.1	227	0	104245	Slc6a5
4	126727650	126740400	12750	47770.8	228	0	332937	Tfap2e
8	70481200	70509250	28050	47215.5	229	0	75620	Kxd1
2	84859600	84895400	35800	46912.1	230	0	72401	Slc43a1
19	24894500	24907450	12950	46589.7	231	0	14237	Foxd4
2	119736800	119765350	28550	46585.5	232	0	68925	Rpap1
12	111267250	111280200	12950	46553.4	233	0	93835	Amn
11	83840150	83858700	18550	46294.3	234	0	21410	Hnf1b
10	81446750	81479400	32650	46190	235	0	319586	Celf5
12	72930950	72951300	20350	45631.4	236	0	75801	4930447C04Rik
3	154319850	154341750	21900	45535.8	237	0	99686	AI606473
15	85568400	85591500	23100	45535.8	238	0	22422	Wnt7b
2	18685700	18703050	17350	45453	239	0	381350	Spag6
2	119311950	119334900	22950	45270.9	240	0	54485	Dll4
14	64575700	64596050	20350	44954.4	241	0	387233	Mir124a-1
19	46126350	46151300	24950	44805.4	242	0	18742	Pitx3
11	82376600	82399550	22950	44698.8	243	0	270893	Tmem132e
2	180883000	180901950	18950	44609.1	244	0	723951	Mir124a-3
19	6494050	6520100	26050	44585.9	245	0	18190	Nrxn2
14	32584900	32613400	28500	44508.2	246	0	107751	Drgx
2	146210800	146230400	19600	44336.6	247	0	78774	Cfap61
11	95820100	95843650	23550	44259.8	248	0	66610	Abi3
11	96991150	97026950	35800	44147.7	249	0	83395	Sp6
9	87726600	87748650	22050	44045.8	250	0	76365	Tbx18
10	87484300	87504800	20500	43985.3	251	0	17172	Ascl1
19	46303050	46336050	33000	43827.8	252	0	73728	Psd
15	99219150	99239200	20050	43648.3	253	0	16512	Kcnh3
13	94698400	94716350	17950	43573.4	254	0	21371	Tbca
8	120929100	120984600	55500	43299	255	0	108148	Galnt2
1	13117800	13136850	19050	43228	256	0	383491	Prdm14
8	70368600	70389050	20450	43155.5	257	0	382056	Crtc1
5	31082150	31102050	19900	43155.5	258	0	22784	Slc30a3
8	91795250	91812250	17000	42991.9	259	0	16373	Irx3
3	107437200	107466200	29000	42918.5	260	0	99738	Kcnc4
2	70468450	70479750	11300	42804.8	261	0	64406	Sp5
8	92351150	92384450	33300	42773.9	262	0	71296	Crnde
4	120256950	120292650	35700	42642.2	263	0	329934	Foxo6
3	30502950	30521650	18700	42607.7	264	0	14013	Mecom
6	64724900	64742450	17550	42483.1	265	0	11921	Atoh1
11	82924850	82957800	32950	42246.4	266	0	76392	Slfn5os
12	73031150	73062300	31150	41954.7	267	0	20471	Six1
4	124651900	124676700	24800	41847.2	268	0	18991	Pou3f1
5	147712750	147734650	21900	41665.5	269	0	14254	Flt1
2	131545300	131570600	25300	41338.9	270	0	11550	Adra1d
11	49605600	49641450	35850	41114.6	271	0	14257	Flt4
3	66965650	66986450	20800	40666.1	272	0	66880	Rsrc1
7	116028700	116042700	14000	40556.3	273	0	68469	Sox6os
5	108359750	108379000	19250	40502.5	274	0	77560	9330198I05Rik
8	92665950	92685550	19600	40459.9	275	0	64379	Irx6
5	35266300	35296150	29850	40339	276	0	11553	Adra2c
12	104465450	104491650	26200	40248.1	277	0	14836	Gsc
14	34810700	34827250	16550	40211.8	278	0	14803	Grid1
17	83063700	83140550	76850	40116	279	0	100503434	Gm19689
3	17783200	17799050	15850	40040.1	280	0	723950	Mir124a-2
8	70078550	70092450	13900	39907.1	281	0	330790	Hapln4
18	38203650	38218100	14450	39760.5	282	0	75599	Pcdh1
5	36853000	36873450	20450	39739.1	283	0	269643	Ppp2r2c
14	79764000	79779250	15250	39630.3	284	0	18530	Pcdh8
2	57096650	57117600	20950	39477.1	285	0	18227	Nr4a2
15	82201750	82222100	20350	39070	286	0	72049	Tnfrsf13c
15	35290600	35309100	18500	39030.7	287	0	107587	Osr2
10	67526650	67543800	17150	38994.4	288	0	13654	Egr2
4	138385750	138402350	16600	38994	289	0	625638	Fam43b
18	61000500	61047200	46700	38971.2	290	0	240332	Slc6a7
1	120331450	120349900	18450	38882.8	291	0	226359	C1ql2
19	37429800	37446800	17000	38663.8	292	0	15242	Hhex
10	52018150	52033250	15100	38535.1	293	0	215031	Vgll2
12	108301150	108331550	30400	38412.5	294	0	214305	Hhipl1
19	6919350	6936750	17400	38358.4	295	0	67077	Catsperz
19	44829950	44845100	15150	38303.9	296	0	73322	1700039E22Rik
4	117471500	117500150	28650	37978.8	297	0	66743	Rnf220
11	4737050	4753900	16850	37894.2	298	0	67178	Zmat5
2	165095650	165123550	27900	37831.4	299	0	104010	Cdh22
7	144832050	144845100	13050	37758.8	300	0	14174	Fgf3
2	164927800	164959550	31750	37740.6	301	0	17395	Mmp9
7	144857950	144870150	12200	37407.2	302	0	14175	Fgf4
7	48952450	48984350	31900	37340.8	303	0	78286	Nav2
12	86413200	86428550	15350	37068.3	304	0	26380	Esrrb
17	34179950	34218300	38350	36995.6	305	0	21355	Tap2
7	27360900	27380500	19600	36979.1	306	0	80297	Sptbn4
2	130571650	130585300	13650	36977.4	307	0	18429	Oxt
11	118896050	118915850	19800	36756.2	308	0	52897	Rbfox3
4	154131550	154143900	12350	36616.8	309	0	59002	Wrap73
2	25575400	25589350	13950	36488.8	310	0	381353	Ajm1
10	62124650	62142400	17750	36468.6	311	0	69894	Fam241b
11	53460800	53488800	28000	36346	312	0	71774	Shroom1
15	7805550	7821650	16100	36136.2	313	0	14573	Gdnf
4	140242150	140257000	14850	36123.4	314	0	230868	Igsf21
4	11376400	11395100	18700	36010.5	315	0	207920	Esrp1
4	153473500	153490600	17100	35744	316	0	230959	Ajap1
11	102935500	102972900	37400	35741.6	317	0	69739	2410004I01Rik
2	116055100	116080500	25400	35521.9	318	0	69974	2810405F15Rik
4	124877000	124907000	30000	35154.6	319	0	73628	1700125G02Rik
6	8944000	8960950	16950	35070.4	320	0	18231	Nxph1
11	6058450	6073550	15100	34968.2	321	0	12323	Camk2b
12	109030750	109060900	30150	34930.8	322	0	380785	Begain
3	102007250	102026850	19600	34921.6	323	0	18072	Nhlh2
11	66515250	66533600	18350	34796.9	324	0	380702	Shisa6
8	94168600	94191900	23300	34758.7	325	0	17750	Mt2
15	79487400	79519700	32300	34524.4	326	0	16520	Kcnj4
11	12014150	12056900	42750	34503	327	0	14783	Grb10
15	98891150	98900950	9800	34488	328	0	69159	Rhebl1
2	22613250	22629800	16550	34431.3	329	0	667663	Myo3a
7	19513750	19527600	13850	34422.1	330	0	69547	Nkpd1
9	57495700	57511100	15400	34415.3	331	0	102614	Rpp25
17	23736800	23751150	14350	34286.1	332	0	76498	Paqr4
14	70614250	70648250	34000	34132	333	0	328440	Npm2
13	54936950	54971950	35000	34106.4	334	0	107448	Unc5a
12	110182550	110197400	14850	34071.5	335	0	67280	3110009F21Rik
15	76506600	76526100	19500	34070.1	336	0	170729	Scrt1
7	45404650	45422900	18250	34066.6	337	0	78405	Ntf5
9	31904100	31922500	18400	33833.9	338	0	12023	Barx2
9	119559350	119585850	26500	33831	339	0	20271	Scn5a
14	70072300	70091850	19550	33797.5	340	0	13655	Egr3
10	127162450	127185750	23300	33694.3	341	0	52666	Arhgef25
17	27500350	27524750	24400	33688.5	342	0	268934	Grm4
2	94231150	94251550	20400	33647.7	343	0	723953	Mir129-2
6	51171550	51201750	30200	33622.4	344	0	387166	Mir148a
6	70948700	70962450	13750	33452.3	345	0	232077	Foxi3
7	101810650	101827000	16350	33434.1	346	0	16332	Inppl1
11	77891800	77944350	52550	33416	347	0	791423	Gm11190
12	99957650	99973350	15700	33379.6	348	0	217826	Kcnk13
11	75161750	75175000	13250	33228	349	0	387208	Mir212
8	14089650	14103300	13650	33216.1	350	0	244310	Dlgap2
19	44504200	44519800	15600	33131.3	351	0	240667	Sec31b
11	70210650	70233200	22550	33122.8	352	0	69309	Slc16a13
2	152022500	152061950	39450	33069.8	353	0	69698	Slc52a3
7	44420600	44446900	26300	32977	354	0	272381	Lrrc4b
10	80295100	80319400	24300	32933.5	355	0	66374	2310011J03Rik
2	180768450	180780650	12200	32834.5	356	0	140489	Bhlhe23
12	112123750	112151050	27300	32834.5	357	0	668303	Kif26a
2	127354800	127371400	16600	32725.5	358	0	215095	Astl
7	132594400	132609950	15550	32525.9	359	0	20231	Nkx1-2
2	180325450	180341250	15800	32505.2	360	0	14464	Gata5
2	172719700	172743850	24150	32234.9	361	0	12162	Bmp7
8	84768450	84791800	23350	32231.1	362	0	18032	Nfix
13	31553200	31563650	10450	32176.9	363	0	15220	Foxq1
9	37415200	37441200	26000	31962.3	364	0	19649	Robo3
2	24467000	24481300	14300	31776.9	365	0	18510	Pax8
15	102742450	102769850	27400	31653.1	366	0	67488	Calcoco1
1	135912000	135932600	20600	31617.1	367	0	18772	Pkp1
4	152278800	152296300	17500	31615.1	368	0	15207	Hes3
11	118548150	118580150	32000	31544.4	369	0	52897	Rbfox3
5	118166150	118183350	17200	31521.3	370	0	12123	Hrk
2	25284350	25299550	15200	31494.4	371	0	99152	Anapc2
11	102142300	102151450	9150	31484.2	372	0	217214	Nags
6	91397750	91419200	21450	31418.1	373	0	22421	Wnt7a
5	112567300	112587200	19900	31417.2	374	0	67325	1700034G24Rik
1	132185200	132214500	29300	31308.1	375	0	723818	Mir135b
11	5053050	5065900	12850	31266.4	376	0	78926	Gas2l1
11	50846950	50855450	8500	31162.8	377	0	108072	Grm6
2	170488850	170504800	15950	30870.2	378	0	13081	Cyp24a1
17	48087650	48100850	13200	30817	379	0	68224	1700067P10Rik
4	117298700	117327150	28450	30781.2	380	0	66743	Rnf220
4	41722500	41731950	9450	30736.4	381	0	550619	Arid3c
11	4940350	4963850	23500	30690.3	382	0	380684	Nefh
7	139939100	139951900	12800	30671.4	383	0	76484	Kndc1
6	84571900	84599450	27550	30570.1	384	0	232174	Cyp26b1
17	8797350	8808100	10750	30522.7	385	0	23984	Pde10a
4	154947950	154966650	18700	30298.3	386	0	269614	Pank4
11	87758050	87770250	12200	30282.3	387	0	207777	Tspoap1
10	19846800	19856800	10000	30054.4	388	0	76157	Slc35d3
8	70722000	70751000	29000	30018	389	0	110385	Pde4c
9	21982800	21996450	13650	29953.2	390	0	77609	Odad3
7	3407700	3428200	20500	29800	391	0	81905	Cacng8
8	46287400	46299900	12500	29727.3	392	0	234219	Helt
X	60884550	60903950	19400	29618.3	393	0	20675	Sox3
17	45522150	45552600	30450	29599.5	394	0	21645	Tcte1
9	45128700	45153950	25250	29525.9	395	0	72821	Scn2b
1	88222000	88270350	48350	29343.5	396	0	381280	Hjurp
13	98495950	98508900	12950	29273	397	0	70090	2310005E17Rik
10	127044400	127066400	22000	29251.7	398	0	216438	Marchf9
5	143354350	143376950	22600	29213	399	0	170935	Grid2ip
4	154404750	154449250	44500	29127.7	400	0	70673	Prdm16
7	63749950	63761900	11950	28903.5	401	0	170711	Otud7a
7	44582150	44610500	28350	28833.7	402	0	71960	Myh14
19	5552200	5571800	19600	28825.1	403	0	381201	Ap5b1
15	97996800	98012400	15600	28800.6	404	0	12824	Col2a1
10	60683850	60703350	19500	28742	405	0	22295	Cdh23
17	87789500	87802300	12800	28727.9	406	0	210741	Kcnk12
2	163201950	163230400	28450	28618	407	0	269389	Tox2
4	134246450	134259900	13450	28589.4	408	0	72690	Fam110d
15	101035800	101058950	23150	28550.5	409	0	668225	Fignl2
5	125527450	125538400	10950	28473.3	410	0	208151	Tmem132b
7	78568050	78588450	20400	28450	411	0	414121	E430016F16Rik
18	80699150	80722650	23500	28320	412	0	18018	Nfatc1
5	30097400	30120650	23250	28264	413	0	97212	Hadha
6	85507600	85520300	12700	28201	414	0	13656	Egr4
14	66629350	66647800	18450	28128.3	415	0	11549	Adra1a
6	31547600	31571350	23750	28110.1	416	0	27205	Podxl
17	79708900	79720500	11600	28055.6	417	0	13078	Cyp1b1
6	114274800	114295750	20950	27928.3	418	0	232333	Slc6a1
16	35530550	35548300	17750	27801.2	419	0	20357	Sema5b
7	142653550	142668600	15050	27764.9	420	0	723874	Mir483
1	74847450	74861850	14400	27741.5	421	0	12570	Cdk5r2
3	131100600	131114800	14200	27692.2	422	0	16842	Lef1
17	15367700	15385450	17750	27670.7	423	0	13388	Dll1
8	95670550	95704750	34200	27668.1	424	0	234593	Ndrg4
4	154463900	154507950	44050	27646.7	425	0	70673	Prdm16
9	21240800	21253050	12250	27583.2	426	0	94226	S1pr5
7	142958900	142976300	17400	27546.8	427	0	17173	Ascl2
5	106556350	106581950	25600	27510.5	428	0	52397	Zfp644
14	58068300	58082300	14000	27328.8	429	0	14180	Fgf9
8	121365700	121405800	40100	27237.9	430	0	108148	Galnt2
6	126636600	126651600	15000	27217.5	431	0	16485	Kcna1
7	4827250	4852600	25350	27183.4	432	0	67441	Isoc2b
8	122666350	122690700	24350	27165.2	433	0	12398	Cbfa2t3
15	95643700	95659400	15700	27131.9	434	0	223843	Dbx2
11	103644900	103656250	11350	27102.2	435	0	104582	Rprml
11	44608000	44623400	15400	27074.4	436	0	13591	Ebf1
1	134638100	134654650	16550	26982.6	437	0	20980	Syt2
5	31128350	31142550	14200	26929	438	0	58522	Trim54
11	59129200	59145100	15900	26929	439	0	380698	Obscn
7	81448850	81469700	20850	26929	440	0	12877	Cpeb1
7	28286250	28304550	18300	26779.3	441	0	280621	Selenov
1	119412750	119428250	15500	26747.3	442	0	16324	Inhbb
11	104127100	104142600	15500	26718.8	443	0	12921	Crhr1
2	152934750	152959500	24750	26692.8	444	0	252864	Dusp15
6	55106350	55123100	16750	26674.6	445	0	12922	Crhr2
3	18046950	18061300	14350	26660.2	446	0	59058	Bhlhe22
7	25171950	25188150	16200	26601.9	447	0	18987	Pou2f2
16	17909900	17922450	12550	26499.9	448	0	27886	Ess2
9	102344750	102360450	15700	26454.6	449	0	270190	Ephb1
11	103353800	103370500	16700	26438.4	450	0	544817	Arhgap27
2	29244000	29262750	18750	26426.3	451	0	76220	6530402F18Rik
12	33948200	33973500	25300	26365.7	452	0	22160	Twist1
4	136888250	136915800	27550	26316.7	453	0	12262	C1qc
4	45819200	45834000	14800	26238.5	454	0	75426	Igfbpl1
4	148798900	148820000	21100	26234.5	455	0	69743	Casz1
1	127672650	127684250	11600	26198.3	456	0	72160	Tmem163
5	75141900	75157500	15600	26129.5	457	0	18595	Pdgfra
4	48044150	48059100	14950	26127.3	458	0	18124	Nr4a3
7	140917350	140929050	11700	26119.7	459	0	101613	Nlrp6
9	32533250	32553400	20150	26056.8	460	0	14247	Fli1
7	81987450	82001350	13900	26056.8	461	0	12173	Bnc1
7	142073950	142103650	29700	26038.6	462	0	18218	Dusp8
1	191174700	191195000	20300	26020.5	463	0	11910	Atf3
X	71655300	71671000	15700	26002.3	464	0	14765	Gpr50
5	114262900	114285950	23050	25966.4	465	0	116810	Foxn4
4	46981650	47001800	20150	25966	466	0	242425	Gabbr2
2	118661250	118684050	22800	25966	467	0	214230	Pak6
2	168760650	168776550	15900	25947.8	468	0	99377	Sall4
7	98826100	98842800	16700	25812.5	469	0	22411	Wnt11
11	76662400	76675450	13050	25693.4	470	0	320522	Bhlha9
10	79915400	79924600	9200	25474.8	471	0	114229	Kiss1r
6	51994500	52015700	21200	25402.7	472	0	54353	Skap2
14	57094300	57108850	14550	25348.2	473	0	14619	Gjb2
18	35648850	35659400	10550	25275.5	474	0	71242	Spata24
7	123976800	123994300	17500	25252.4	475	0	628779	Hs3st4
8	124780950	124803600	22650	25221	476	0	330863	Trim67
4	107429050	107447700	18650	25184.6	477	0	230587	Glis1
15	98162200	98174500	12300	25166.4	478	0	78541	Asb8
9	45428550	45437150	8600	25141.4	479	0	74602	4833428L15Rik
11	59169650	59189300	19650	25063.6	480	0	14923	Guk1
2	144324100	144337750	13650	25057.4	481	0	107586	Ovol2
5	134982950	134993800	10850	24963.7	482	0	71304	Wbscr25
12	109435500	109464250	28750	24930.2	483	0	13386	Dlk1
12	53241050	53252550	11500	24930.2	484	0	27386	Npas3
16	11976350	11995100	18750	24839.4	485	0	72555	Shisa9
2	164397750	164412050	14300	24821.2	486	0	19668	Rbpjl
2	163906250	163922700	16450	24712.2	487	0	241770	Rims4
7	141941850	141957700	15850	24694	488	0	75770	Brsk2
17	46437000	46462850	25850	24694	489	0	108114	Slc22a7
11	95905950	95926700	20750	24694	490	0	14422	B4galnt2
5	67601950	67615150	13200	24675.8	491	0	330096	Shisa3
2	180094950	180120100	25150	24621.3	492	0	99296	Hrh3
16	17795000	17809000	14000	24570	493	0	224024	Scarf2
8	123882150	123898650	16500	24512.3	494	0	234865	Nup133
7	135405150	135413950	8800	24509.2	495	0	270004	Foxi2
13	23305600	23320000	14400	24476	496	0	75887	4930586N03Rik
16	20588000	20599400	11400	24362.3	497	0	328643	Vwa5b2
8	12462800	12481450	18650	24344.8	498	0	434280	Sox1ot
19	42194850	42213850	19000	24335.7	499	0	54612	Sfrp5
3	83121900	83132350	10450	24319.5	500	0	100534287	Dchs2
16	18771700	18782900	11200	24294.3	501	0	12741	Cldn5
3	103567200	103587900	20700	24275.9	502	0	54524	Syt6
9	89864650	89894800	30150	24185.2	503	0	74700	4930524O08Rik
6	87726600	87737200	10600	24185.2	504	0	58229	Efcc1
17	93197850	93206500	8650	24167.4	505	0	11516	Adcyap1
11	119084700	119102050	17350	24151.5	506	0	12418	Cbx4
18	82401150	82413550	12400	24130.7	507	0	14427	Galr1
2	69581000	69594250	13250	24116.5	508	0	14725	Lrp2
17	32389100	32401650	12550	24098.7	509	0	320484	Rasal3
2	115848800	115863100	14300	23999.8	510	0	17536	Meis2
5	38272200	38281550	9350	23972	511	0	21906	Otop1
9	114556100	114567750	11650	23912.7	512	0	636931	Trim71
5	93039600	93053250	13650	23905.6	513	0	78088	Sowahb
14	46377600	46400300	22700	23902.2	514	0	12159	Bmp4
9	58812950	58832100	19150	23821.8	515	0	330953	Hcn4
11	95574700	95602600	27900	23712.8	516	0	18053	Ngfr
11	95116300	95127350	11050	23643	517	0	13393	Dlx3
14	68067550	68090450	22900	23621.9	518	0	18040	Nefm
11	52760150	52769650	9500	23567.4	519	0	320027	Fstl4
2	10366250	10379100	12850	23512.9	520	0	353282	Sfmbt2
4	115886800	115910000	23200	23509.3	521	0	76237	Tmem275
19	54044450	54056350	11900	23455.8	522	0	11551	Adra2a
15	80278300	80295650	17350	23436.8	523	0	239556	Cacna1i
13	56748550	56758750	10200	23403.9	524	0	17129	Smad5
18	6999450	7009500	10050	23385.7	525	0	210719	Mkx
11	97621900	97633050	11150	23367.5	526	0	69729	2410003L11Rik
19	41732050	41756850	24800	23346	527	0	20562	Slit1
6	49815100	49830450	15350	23276.7	528	0	109648	Npy
9	56791200	56801800	10600	23167.7	529	0	235402	Lingo1
1	172324150	172353650	29500	23095	530	0	16524	Kcnj9
11	116279350	116286950	7600	23076.8	531	0	14428	Galr2
1	75416250	75436400	20150	23073.2	532	0	69080	Gmppa
17	46478300	46504700	26400	23058.6	533	0	78309	Cul9
9	107367400	107386800	19400	23023.7	534	0	56808	Cacna2d2
X	137092000	137107150	15150	22986	535	0	13984	Esx1
11	114775600	114797300	21700	22979	536	0	72014	Btbd17
15	31360700	31377750	17050	22852.8	537	0	67434	Ankrd33b
5	98248550	98261450	12900	22822.4	538	0	14176	Fgf5
11	63916850	63928500	11650	22804.3	539	0	54710	Hs3st3b1
15	89370550	89380150	9600	22776.8	540	0	72962	Tymp
6	112482350	112494200	11850	22725.8	541	0	18430	Oxtr
2	118889600	118901900	12300	22719.3	542	0	228536	Bahd1
8	22967500	22989200	21700	22602.2	543	0	11733	Ank1
7	51620550	51634250	13700	22599.4	544	0	140919	Slc17a6
17	56113800	56128700	14900	22459	545	0	76905	Lrg1
6	91276150	91293850	17700	22350	546	0	14115	Fbln2
8	12310200	12340850	30650	22326.6	547	0	434280	Sox1ot
8	75208200	75219950	11750	22313.6	548	0	75141	Rasd2
18	74436250	74449950	13700	22313.6	549	0	17919	Myo5b
7	40890800	40906400	15600	22293.9	550	0	58188	Vstm2b
8	104536450	104545300	8850	22271.6	551	0	12354	Car7
5	130443550	130456500	12950	22203	552	0	140904	Caln1
14	39467850	39480200	12350	22131.9	553	0	18183	Nrg3
5	128591800	128610750	18950	22131.2	554	0	93897	Fzd10
2	164160350	164174600	14250	22105.5	555	0	16538	Kcns1
11	84953950	84964450	10500	22095.6	556	0	12351	Car4
9	121487850	121500000	12150	21879.2	557	0	12424	Cck
2	79450300	79461650	11350	21877.5	558	0	228094	Cerkl
6	119312750	119335850	23100	21859.4	559	0	319734	Cacna2d4
18	80357350	80376100	18750	21823	560	0	240444	Kcng2
8	121715050	121735350	20300	21813.1	561	0	57340	Jph3
15	89054300	89073100	18800	21812.3	562	0	83456	Mov10l1
17	12500950	12511700	10750	21769.6	563	0	20519	Slc22a3
7	110623450	110632100	8650	21677.7	564	0	11535	Adm
5	101518700	101546550	27850	21659.5	565	0	18096	Nkx6-1
9	110723250	110753700	30450	21639.1	566	0	19228	Pth1r
17	25465300	25507150	41850	21605	567	0	71840	Tekt4
12	31549750	31563700	13950	21605	568	0	23985	Slc26a4
9	108816950	108839000	22050	21546	569	0	80987	Nckipsd
5	37018500	37037650	19150	21527.9	570	0	76071	Jakmip1
15	64917600	64927900	10300	21504.5	571	0	11514	Adcy8
13	30744250	30755850	11600	21496	572	0	16364	Irf4
4	41492350	41504050	11700	21459.6	573	0	329828	Myorg
7	30628900	30641050	12150	21440.7	574	0	71909	Haus5
11	120653700	120664400	10700	21423.3	575	0	77583	Notum
18	67126600	67139400	12800	21387	576	0	14680	Gnal
5	128427600	128449050	21450	21386.9	577	0	243274	Tmem132d
1	50922150	50932000	9850	21386.9	578	0	56363	Tmeff2
16	5124450	5137700	13250	21386.9	579	0	19041	Ppl
19	25500000	25515450	15450	21368.8	580	0	50796	Dmrt1
1	156198050	156208700	10650	21314.3	581	0	329274	Fam163a
13	3354450	3365200	10750	21309.9	582	0	76937	2810429I04Rik
13	56220600	56237250	16650	21301.6	583	0	75245	4930550C17Rik
2	163848850	163868150	19300	21296.1	584	0	241770	Rims4
6	29165950	29183700	17750	21277.9	585	0	101359	Prrt4
2	156605050	156626050	21000	21259.7	586	0	228836	Dlgap4
15	72540800	72554400	13600	21259.7	587	0	223604	Kcnk9
19	56715900	56733200	17300	21215.3	588	0	11554	Adrb1
6	67529100	67541300	12200	21205.2	589	0	56753	Tacstd2
9	32331650	32352550	20900	21199.6	590	0	16521	Kcnj5
7	34669150	34695250	26100	21168.9	591	0	68947	Chst8
18	21649650	21659600	9950	21150.7	592	0	74644	4930426D05Rik
X	141717800	141727950	10150	21150.4	593	0	16370	Irs4
6	127757850	127777950	20100	21133.1	594	0	381813	Prmt8
9	107224200	107239950	15750	21132.5	595	0	208869	Dock3
13	116702900	116713600	10700	21132.5	596	0	74680	4930435F18Rik
13	56286000	56307800	21800	21078	597	0	57266	Cxcl14
7	16468050	16483400	15350	21041.7	598	0	18142	Npas1
11	81145450	81157350	11900	21023.5	599	0	11418	Asic2
11	115854300	115863750	9450	20980	600	0	217325	Llgl2
13	98569150	98592550	23400	20969	601	0	68344	Tmem174
5	30703800	30718600	14800	20950.8	602	0	65254	Dpysl5
15	80004550	80021250	16700	20917.8	603	0	18591	Pdgfb
7	37763450	37780100	16650	20914.5	604	0	243937	Zfp536
2	148390100	148410750	20650	20878.2	605	0	21824	Thbd
8	11468600	11483200	14600	20805.5	606	0	19332	Rab20
2	174277900	174303000	25100	20805.2	607	0	56802	Gnasas1
10	43997350	44010450	13100	20772.4	608	0	11630	Crybg1
8	106597600	106608650	11050	20745.5	609	0	12550	Cdh1
4	150026300	150036250	9950	20732.8	610	0	100198	H6pd
15	79150500	79170550	20050	20732.8	611	0	69833	Polr2f
11	120527250	120535900	8650	20732.8	612	0	14527	Gcgr
5	138990100	139002600	12500	20678.3	613	0	18590	Pdgfa
2	25172550	25187250	14700	20678.3	614	0	67122	Nrarp
12	58206800	58219400	12600	20660.7	615	0	20605	Sstr1
15	37225950	37235750	9800	20620	616	0	252973	Grhl2
16	17825900	17839150	13250	20605.6	617	0	80733	Car15
17	56504950	56517050	12100	20555.1	618	0	20834	Znrf4
16	9986150	9999800	13650	20496.2	619	0	14811	Grin2a
15	11028650	11039350	10700	20450.6	620	0	239336	Rxfp3
6	29525100	29533550	8450	20429.7	621	0	27056	Irf5
8	15006400	15035800	29400	20386.2	622	0	74901	Kbtbd11
2	181666700	181676000	9300	20369.4	623	0	20672	Sox18
2	150681200	150694450	13250	20369.4	624	0	114889	Vsx1
11	102098850	102110000	11150	20363.8	625	0	217212	Pyy
13	92419350	92432550	13200	20339.1	626	0	218440	Ankrd34b
5	22338600	22352000	13400	20314.9	627	0	19699	Reln
8	108692700	108704000	11300	20241.2	628	0	11906	Zfhx3
4	131911550	131928100	16550	20231.6	629	0	623230	Tmem200b
2	31308500	31320350	11850	20204.9	630	0	665700	Hmcn2
16	35146000	35167350	21350	20186.2	631	0	224129	Adcy5
11	115149050	115180300	31250	20169.5	632	0	58222	Rab37
X	7917000	7931550	14550	20163	633	0	668963	Btbd35f20
11	71737000	71757550	20550	20124	634	0	216881	Wscd1
11	18866150	18882750	16600	20115	635	0	17268	Meis1
5	37885250	37908450	23200	20091.6	636	0	102637176	Gm20052
10	127506550	127519350	12800	20078.9	637	0	407790	Ndufa4l2
2	31830950	31848800	17850	20008.8	638	0	98970	Fibcd1
4	130130000	130147000	17000	19994.7	639	0	230777	Hcrtr1
4	155032150	155050550	18400	19969.6	640	0	269615	Plch2
5	137023750	137034750	11000	19915.1	641	0	381677	Vgf
19	7121950	7170400	48450	19806.1	642	0	107227	Macrod1
11	103741000	103754900	13900	19786.6	643	0	22412	Wnt9b
10	81248100	81264300	16200	19724.5	644	0	17179	Matk
15	87538100	87552950	14850	19715.2	645	0	106014	Tafa5
9	120297550	120309050	11500	19678.8	646	0	245049	Myrip
17	35314150	35324650	10500	19642.5	647	0	15006	H2-Q1
19	48202800	48214600	11800	19624.4	648	0	66673	Sorcs3
11	101258250	101273800	15550	19613.6	649	0	69847	Wnk4
7	131963850	131977350	13500	19460.8	650	0	233919	Gpr26
10	127321200	127332750	11550	19460.8	651	0	216445	Arhgap9
11	101959150	101969100	9950	19433.6	652	0	74499	Sost
9	37524600	37533750	9150	19419.3	653	0	69524	Esam
14	21982000	21997700	15700	19402.9	654	0	218820	Zfp503
X	37042550	37054850	12300	19388.2	655	0	245381	Sowahd
2	131049900	131057350	7450	19388.2	656	0	110751	Adam33
10	7387050	7397100	10050	19370	657	0	77777	Ulbp1
5	138814100	138826650	12550	19351.8	658	0	384244	Foxl3
6	91835650	91849800	14150	19333.6	659	0	243547	Grip2
17	74043000	74053850	10850	19333.6	660	0	94224	Srd5a2
12	112868100	112881650	13550	19327.6	661	0	56696	Gpr132
15	89134650	89151250	16600	19242.2	662	0	29857	Mapk12
17	85791200	85807400	16200	19206.5	663	0	20472	Six2
11	101160950	101180050	19100	19182.5	664	0	53321	Cntnap1
8	106130650	106142300	11650	19139.3	665	0	77411	Esrp2
5	117836700	117848250	11550	19133.8	666	0	18125	Nos1
5	73003150	73018850	15700	19097.4	667	0	231290	Slc10a4
6	114035950	114046550	10600	19096.8	668	0	11941	Atp2b2
9	48827350	48841050	13700	19079.3	669	0	235320	Zbtb16
6	32580650	32596100	15450	19079.3	670	0	243743	Plxna4
14	70883450	70898950	15500	19078.5	671	0	14586	Gfra2
19	58448500	58462000	13500	19042.9	672	0	14585	Gfra1
11	112772300	112792000	19700	19039.6	673	0	217294	BC006965
9	111307950	111318400	10450	19006.6	674	0	320429	Trank1
9	103107000	103124900	17900	19004.7	675	0	270192	Rab6b
5	118024800	118029800	5000	18941.3	676	0	57816	Tesc
11	69958050	69970100	12050	18933.9	677	0	54351	Elp5
5	33991050	34006950	15900	18915.7	678	0	269642	Nat8l
1	91338350	91352050	13700	18897.5	679	0	70788	Klhl30
12	86972700	86996100	23400	18897.5	680	0	238331	Zdhhc22
4	91367950	91377600	9650	18842.9	681	0	15569	Elavl2
7	144892950	144905200	12250	18840.7	682	0	14170	Fgf15
2	36195400	36218550	23150	18822.7	683	0	67871	Mrrf
1	87257750	87267150	9400	18818.3	684	0	98363	Efhd1
9	64383050	64390700	7650	18767.9	685	0	214058	Megf11
7	49673700	49693200	19500	18748.7	686	0	13172	Dbx1
11	11106600	11120850	14250	18734	687	0	319922	Vwc2
2	157909500	157932050	22550	18691.7	688	0	277432	Vstm2l
11	19006850	19022350	15500	18679.5	689	0	17268	Meis1
2	29741900	29755000	13100	18661.3	690	0	433415	Gm13420
19	42426950	42441300	14350	18643.2	691	0	72832	Crtac1
1	5016150	5023900	7750	18606.8	692	0	58175	Rgs20
9	8895850	8905850	10000	18588.6	693	0	18667	Pgr
7	141458050	141469850	11800	18546.1	694	0	66853	Pnpla2
10	103024700	103037150	12450	18534.1	695	0	216285	Alx1
7	49968800	49985900	17100	18509.8	696	0	338352	Nell1
4	120741400	120753050	11650	18507.5	697	0	60613	Kcnq4
11	7050800	7075550	24750	18479.6	698	0	432530	Adcy1
17	33970850	33983050	12200	18443.3	699	0	630499	H2-K2
5	143281700	143299100	17400	18352.4	700	0	330230	Zfp853
18	25670400	25698950	28550	18316.1	701	0	108013	Celf4
9	95552050	95565850	13800	18279.7	702	0	75552	Paqr9
7	128411100	128426650	15550	18261.6	703	0	67865	Rgs10
5	136564750	136584350	19600	18261.6	704	0	13047	Cux1
2	179658800	179701400	42600	18224.8	705	0	12561	Cdh4
3	89821650	89836700	15050	18216.1	706	0	214547	She
2	162653950	162665450	11500	18212.7	707	0	77288	9430021M05Rik
1	86040400	86050450	10050	18169.7	708	0	72792	2810459M11Rik
19	10451500	10471050	19550	18169	709	0	54525	Syt7
1	154720350	154735250	14900	18152.5	710	0	12290	Cacna1e
14	29716650	29729650	13000	18098	711	0	12294	Cacna2d3
17	35339200	35346350	7150	18079.9	712	0	15013	H2-Q2
10	112265200	112275900	10700	18079.8	713	0	268345	Kcnc2
3	107093100	107107050	13950	18061.7	714	0	16490	Kcna2
19	5076150	5086800	10650	18057.5	715	0	381199	Tmem151a
7	141289750	141298400	8650	17989	716	0	54006	Deaf1
11	82429000	82442850	13850	17951.6	717	0	270893	Tmem132e
7	47127900	47137600	9700	17941.4	718	0	19259	Ptpn5
8	32880300	32890000	9700	17916.3	719	0	211323	Nrg1
8	4201800	4222300	20500	17912.5	720	0	73072	Prr36
9	14856100	14866450	10350	17890.7	721	0	14608	Gpr83
15	84437200	84456150	18950	17874.6	722	0	72301	Shisal1
7	99616200	99634950	18750	17825.5	723	0	100503386	Tpbgl
13	69729300	69747700	18400	17823.8	724	0	76980	Ube2ql1
15	99050200	99062400	12200	17816.4	725	0	19132	Prph
1	135815400	135824250	8850	17807.3	726	0	16763	Lad1
14	84440400	84450300	9900	17807.3	727	0	219228	Pcdh17
17	86750400	86761150	10750	17801.3	728	0	13819	Epas1
10	61412600	61423850	11250	17789.1	729	0	18119	Nodal
11	52162250	52175800	13550	17752.8	730	0	257871	Or2y7
17	83626200	83636650	10450	17752.2	731	0	225030	Kcng3
17	26108750	26121800	13050	17748	732	0	60455	Pgap6
4	154060850	154086150	25300	17734.6	733	0	22062	Trp73
11	75188000	75205200	17200	17716.5	734	0	237847	Rtn4rl1
2	18794900	18805000	10100	17698.3	735	0	66774	Carlr
2	25393050	25410350	17300	17609	736	0	18146	Npdc1
6	39864150	39876700	12550	17607.4	737	0	434008	Tmem178b
11	74584850	74595050	10200	17588.7	738	0	380711	Rap1gap2
13	38145850	38153750	7900	17569.8	739	0	109620	Dsp
5	37157300	37171500	14200	17569.2	740	0	381634	Gm1043
4	134364000	134374900	10900	17552.9	741	0	56219	Extl1
12	30877100	30891300	14200	17516.6	742	0	100294583	Alkal2
5	143249350	143261150	11800	17480.2	743	0	54201	Zfp316
1	23756850	23766600	9750	17480.2	744	0	280645	B3gat2
6	118187000	118202000	15000	17407.5	745	0	19713	Ret
11	61015500	61028650	13150	17389.4	746	0	16515	Kcnj12
1	19098000	19114350	16350	17385.2	747	0	226896	Tfap2d
7	99259400	99275850	16450	17362.8	748	0	381967	Gm26705
18	36316500	36329550	13050	17353	749	0	66060	Cystm1
8	35817450	35832250	14800	17333.1	750	0	71908	Cldn23
2	127646600	127662150	15550	17307.2	751	0	17153	Mal
1	91793350	91811600	18250	17298.5	752	0	13345	Twist2
7	138935750	138948600	12850	17279.3	753	0	74004	Jakmip3
7	27322800	27340050	17250	17262.2	754	0	108075	Ltbp4
7	31038600	31056200	17600	17244	755	0	57780	Fxyd7
2	119233100	119243000	9900	17244	756	0	20732	Spint1
7	34804200	34818050	13850	17225.8	757	0	68947	Chst8
5	120673450	120701650	28200	17225.8	758	0	19415	Rasal1
12	80748400	80764600	16200	17189.5	759	0	380768	Ccdc177
12	98567300	98580750	13450	17151.3	760	0	72258	Kcnk10
15	39192050	39200200	8150	17116.8	761	0	116838	Rims2
2	149825600	149837350	11750	17058.1	762	0	433485	Syndig1
17	35465150	35477000	11850	17044.1	763	0	15007	H2-Q10
9	71211850	71223050	11200	16992.3	764	0	19378	Aldh1a2
2	158663400	158675650	12250	16971.3	765	0	228852	Ppp1r16b
6	124989700	125006100	16400	16970.6	766	0	319352	Pianp
7	98188550	98198850	10300	16969	767	0	272411	B3gnt6
13	96125550	96139300	13750	16956.6	768	0	75209	Sv2c
7	18952800	18971800	19000	16953.3	769	0	384569	Nova2
7	126077400	126088900	11500	16898.8	770	0	269994	Gsg1l
11	98539200	98552550	13350	16898.8	771	0	69376	Zpbp2
9	121634100	121650550	16450	16880.6	772	0	69032	Lyzl4
19	30538650	30555350	16700	16880.6	773	0	546723	Ppp1r2-ps3
9	31125250	31136800	11550	16862.4	774	0	19143	St14
2	91918650	91937050	18400	16844.3	775	0	228361	Ambra1
8	47405200	47415600	10400	16790.7	776	0	71069	Stox2
4	124173650	124202900	29250	16784.7	777	0	78460	1700057H15Rik
15	73832800	73853950	21150	16771.6	778	0	268816	Mroh5
7	121389100	121398700	9600	16753.4	779	0	195646	Hs3st2
2	113755350	113762850	7500	16735.2	780	0	23892	Grem1
14	33914400	33935150	20750	16717.1	781	0	14560	Gdf10
15	11901300	11909550	8250	16717.1	782	0	381002	Gm5144
11	104229200	104238250	9050	16698.9	783	0	17762	Mapt
5	73645400	73658850	13450	16694.4	784	0	73472	Spata18
14	51736700	51745450	8750	16680.7	785	0	219033	Ang4
13	56431800	56442050	10250	16678.5	786	0	328258	Slc25a48
17	24743450	24758600	15150	16673	787	0	328779	Hs3st6
5	115180600	115198750	18150	16644.8	788	0	29867	Cabp1
12	86208450	86223250	14800	16644.4	789	0	328136	Gm805
18	46197400	46216800	19400	16553.5	790	0	28105	Trim36
1	132875700	132889450	13750	16542.8	791	0	16980	Lrrn2
2	180375000	180391900	16900	16534.5	792	0	387136	Mir1a-1
18	74953850	74965300	11450	16491.7	793	0	16891	Lipg
8	27222200	27230950	8750	16488	794	0	76615	Got1l1
4	152338750	152365350	26600	16481.8	795	0	269610	Chd5
4	104364150	104373900	9750	16480.8	796	0	13131	Dab1
8	25032900	25044900	12000	16462.7	797	0	83436	Plekha2
13	48721650	48747550	25900	16462.7	798	0	18676	Phf2
3	104772050	104787150	15100	16411.5	799	0	71887	Ppm1j
1	181350450	181357250	6800	16390	800	0	72978	Cnih3
13	23391100	23403200	12100	16390	801	0	75887	4930586N03Rik
4	148397800	148410050	12250	16371.8	802	0	71707	Ubiad1
18	78042300	78052050	9750	16332.8	803	0	620235	Siglec15
11	78478700	78504150	25450	16301.1	804	0	237868	Sarm1
1	34744250	34757100	12850	16298.4	805	0	226970	Arhgef4
19	56864900	56879450	14550	16262.8	806	0	83561	Tdrd1
7	143098500	143113500	15000	16226.5	807	0	16535	Kcnq1
9	55021500	55033250	11750	16208.3	808	0	110834	Chrna3
11	9111950	9123950	12000	16176.9	809	0	22271	Upp1
6	121404850	121420150	15300	16171.9	810	0	243621	Iqsec3
4	143343400	143353750	10350	16171.9	811	0	242735	Lrrc38
1	74767500	74776800	9300	16167.6	812	0	22420	Wnt6
3	93439100	93452600	13500	16150.3	813	0	99681	Tchh
19	40871900	40895600	23700	16135.6	814	0	72672	Zfp518a
2	127533200	127547500	14300	16122.6	815	0	192212	Prom2
4	141284950	141307350	22400	16117.4	816	0	13836	Epha2
4	134338900	134349450	10550	16107.3	817	0	230810	Slc30a2
13	100548350	100557650	9300	16081.1	818	0	18260	Ocln
8	71552100	71567000	14900	16062.9	819	0	434325	Tmem221
12	102126050	102135550	9500	16056.1	820	0	238384	Slc24a4
5	34284850	34294800	9950	16033.2	821	0	231125	Zfyve28
4	133493300	133505450	12150	16017.2	822	0	69539	Trnp1
8	23398400	23416650	18250	16007.3	823	0	20377	Sfrp1
9	110628000	110657050	29050	15981.1	824	0	72654	Ccdc12
4	141234750	141253150	18400	15964.9	825	0	213649	Arhgef19
8	94690400	94698550	8150	15953.9	826	0	67801	Pllp
5	63647250	63654900	7650	15917.5	827	0	319807	Nwd2
7	78879150	78893950	14800	15915.7	828	0	723884	Mir7-2
1	156300600	156314150	13550	15897.2	829	0	214575	Tdrd5
4	123178000	123190250	12250	15881.2	830	0	170638	Hpcal4
4	137273250	137291300	18050	15843.8	831	0	22417	Wnt4
9	69661550	69677300	15750	15808.5	832	0	64290	Foxb1
19	4708450	4725300	16850	15790.4	833	0	20743	Sptbn2
1	132526650	132550200	23550	15785	834	0	21367	Cntn2
5	112222750	112234400	11650	15780.9	835	0	330166	Miat
9	34483150	34501050	17900	15754	836	0	67703	Kirrel3
3	29076650	29088050	11400	15754	837	0	75740	Egfem1
2	126548550	126557350	8800	15717.7	838	0	26458	Slc27a2
12	80513100	80526800	13700	15717.7	839	0	69522	2310002D06Rik
2	130354800	130370400	15600	15623.4	840	0	228598	Ebf4
3	105445200	105460350	15150	15606.9	841	0	78635	Kcnd3os
2	31873100	31894550	21450	15588.1	842	0	23928	Lamc3
3	104955500	104968500	13000	15563.5	843	0	22414	Wnt2b
17	43625350	43635200	9850	15528.7	844	0	210510	Tdrd6
9	112229150	112241850	12700	15526	845	0	74100	Arpp21
10	73093950	73105450	11500	15517.8	846	0	11994	Pcdh15
2	25860750	25888100	27350	15499.4	847	0	227632	Kcnt1
4	139065500	139078850	13350	15490.4	848	0	15565	Htr6
8	84408300	84422650	14350	15484	849	0	12286	Cacna1a
X	57911700	57926600	14900	15445.1	850	0	22773	Zic3
9	43877250	43885250	8000	15426.9	851	0	58235	Nectin1
5	52105150	52121200	16050	15426.9	852	0	102466648	Mir6417
17	44722750	44741900	19150	15408.8	853	0	12393	Runx2
19	53667700	53679000	11300	15380.4	854	0	73713	Rbm20
16	97755850	97768450	12600	15335.8	855	0	72388	Ripk4
4	123099150	123109600	10450	15317.9	856	0	12164	Bmp8b
2	152137000	152149250	12250	15317.9	857	0	21407	Tcf15
1	40675300	40686650	11350	15317.9	858	0	226999	Slc9a2
16	8419100	8428250	9150	15317.9	859	0	74720	Tmem114
15	74556700	74577200	20500	15311.3	860	0	107831	Adgrb1
18	23034750	23044450	9700	15299.7	861	0	319211	Nol4
4	44415600	44432450	16850	15281.6	862	0	17279	Melk
15	102685150	102700950	15800	15238.7	863	0	67488	Calcoco1
2	181454300	181468950	14650	15208.9	864	0	72147	Zbtb46
8	17529050	17541750	12700	15172.6	865	0	94109	Csmd1
9	22041900	22058950	17050	15132.3	866	0	319601	Zfp653
15	83767100	83788650	21550	15125.4	867	0	223726	Mpped1
2	75131600	75149400	17800	15118	868	0	53375	Mtx2
3	27364800	27375750	10950	15118	869	0	208188	Ghsr
1	133158900	133174750	15850	15081.7	870	0	240753	Plekha6
1	180694100	180700700	6600	15058.4	871	0	27217	Mixl1
2	33535800	33549050	13250	15045.4	872	0	16917	Lmx1b
15	103127250	103152000	24750	15031.5	873	0	432989	D930007P13Rik
13	84338400	84352550	14150	15009	874	0	72745	Tmem161b
17	29880650	29893650	13000	14900	875	0	74762	Mdga1
16	30299350	30312500	13150	14881.8	876	0	224088	Atp13a3
17	51828650	51838400	9750	14863.6	877	0	20230	Satb1
2	155621900	155636650	14750	14791	878	0	735275	Mir499
6	55445000	55459000	14000	14779.8	879	0	11517	Adcyap1r1
10	94937000	94950000	13000	14772.8	880	0	54712	Plxnc1
11	3756600	3777850	21250	14772.6	881	0	74309	Osbp2
6	38348800	38361900	13100	14701.7	882	0	78781	Zc3hav1
2	147078650	147094700	16050	14700.5	883	0	228731	Nkx2-4
3	90459100	90470500	11400	14694.8	884	0	18160	Npr1
10	44522950	44531100	8150	14676.7	885	0	12142	Prdm1
9	57936450	57957750	21300	14610.5	886	0	20361	Sema7a
10	90825400	90835750	10350	14586.5	887	0	77531	Anks1b
5	144539800	144555850	16050	14586	888	0	53324	Nptx2
7	100002850	100011800	8950	14554.7	889	0	69121	Chrdl2
14	61679900	61693350	13450	14536.6	890	0	668253	Dleu2
5	72575700	72591500	15800	14518.4	891	0	545758	Slc10a4-ps
8	126130700	126146650	15950	14482.1	892	0	210027	Slc35f3
2	18603500	18613800	10300	14463.6	893	0	12238	Commd3
10	61969350	61984500	15150	14439.9	894	0	12817	Col13a1
18	86708550	86718600	10050	14427.6	895	0	12405	Cbln2
14	70547150	70563100	15950	14426.6	896	0	72549	Reep4
16	35649300	35667000	17700	14409.1	897	0	20357	Sema5b
7	25002700	25016150	13450	14405.6	898	0	232975	Atp1a3
15	99659600	99679850	20250	14383.1	899	0	11419	Asic1
8	56616950	56626350	9400	14354.9	900	0	50753	Fbxo8
2	29841300	29852500	11200	14354.9	901	0	723904	Mir219a-2
17	35417900	35427400	9500	14354.9	902	0	15019	H2-Q8
15	82946450	82970250	23800	14326	903	0	21411	Tcf20
5	37239300	37249500	10200	14318.4	904	0	12933	Crmp1
4	129970150	129993700	23550	14300.4	905	0	230775	Adgrb2
10	114798050	114805950	7900	14282.2	906	0	237553	Trhde
7	79785250	79799050	13800	14281	907	0	626359	Wdr93
14	66275200	66283500	8300	14273.1	908	0	19229	Ptk2b
4	156254250	156256050	1800	14260.8	909	0	231004	Samd11
13	51562350	51575100	12750	14260.2	910	0	20418	Shc3
1	125905900	125918350	12450	14255.8	911	0	72585	Lypd1
16	97606650	97614850	8200	14245.8	912	0	50528	Tmprss2
7	35181150	35198500	17350	14235.8	913	0	53896	Slc7a10
9	52674350	52683700	9350	14229.6	914	0	382139	Gm1715
9	78388850	78400600	11750	14220.2	915	0	100048658	Ddx43
7	45830050	45838250	8200	14208.4	916	0	14814	Grin2d
7	4772350	4786900	14550	14173.2	917	0	78052	Tmem190
12	84873400	84883350	9950	14173.2	918	0	16997	Ltbp2
12	55595600	55602500	6900	14155	919	0	56856	Insm2
6	113885800	113897100	11300	14148.7	920	0	11941	Atp2b2
3	96463550	96486550	23000	14136.8	921	0	329716	BC107364
3	89314800	89326800	12000	14118.6	922	0	13638	Efna3
5	75974100	75983300	9200	14113	923	0	16542	Kdr
8	9768500	9777350	8850	14100.5	924	0	270028	Nalf1
6	7551250	7559050	7800	14099.7	925	0	21333	Tac1
1	62696450	62712500	16050	14095.4	926	0	18187	Nrp2
10	4705400	4718500	13100	14082.3	927	0	13982	Esr1
8	84008350	84016750	8400	14046	928	0	70134	Misp3
18	66456650	66462750	6100	14045.5	929	0	58801	Pmaip1
14	63579750	63598300	18550	14027.8	930	0	219149	Xkr6
2	109671250	109681700	10450	13973.3	931	0	12064	Bdnf
1	184874550	184886750	12200	13972.2	932	0	226777	C130074G19Rik
7	131638200	131650300	12100	13971.1	933	0	14183	Fgfr2
1	121170900	121186850	15950	13955.1	934	0	98452	Celrr
7	24629750	24643600	13850	13948.8	935	0	72434	Lypd3
9	21159650	21170000	10350	13936.9	936	0	18577	Pde4a
2	181028900	181047700	18800	13936.9	937	0	11438	Chrna4
13	54868950	54890100	21150	13934.6	938	0	107448	Unc5a
17	69070200	69080350	10150	13904.1	939	0	13823	Epb41l3
2	181130900	181141150	10250	13900.6	940	0	16536	Kcnq2
18	36191250	36203850	12600	13864.3	941	0	100042150	Nrg2
12	76401250	76409500	8250	13864.3	942	0	15512	Hspa2
8	111378450	111402900	24450	13846.1	943	0	338521	Fa2h
4	109654700	109661850	7150	13846.1	944	0	12580	Cdkn2c
2	168908250	168914050	5800	13827.9	945	0	22722	Zfp64
16	92691500	92707400	15900	13827.7	946	0	12394	Runx1
7	109163950	109181600	17650	13825.2	947	0	109594	Lmo1
7	130932050	130940550	8500	13822.5	948	0	56213	Htra1
7	82329400	82343050	13650	13809.7	949	0	269959	Adamtsl3
11	93096900	93105150	8250	13791.6	950	0	72605	Car10
11	72954800	72971750	16950	13782.2	951	0	53313	Atp2a3
1	14749650	14759100	9450	13773.4	952	0	17681	Msc
15	101836400	101866000	29600	13763.2	953	0	406220	Krt77
2	163333750	163342900	9150	13755.2	954	0	59091	Jph2
11	11678700	11691050	12350	13736.5	955	0	22778	Ikzf1
18	31927100	31948850	21750	13735.9	956	0	574402	Gpr17
4	36948750	36955150	6400	13700.7	957	0	242384	Lingo2
11	22851800	22867950	16150	13692.4	958	0	53625	B3gnt2
9	106143450	106153100	9650	13682.6	959	0	235582	Glyctk
11	72127450	72139900	12450	13682.6	960	0	327958	Pitpnm3
1	163305200	163320000	14800	13676.7	961	0	18933	Prrx1
6	118005150	118020050	14900	13664.4	962	0	70727	Rasgef1a
7	108947900	108957500	9600	13658.7	963	0	22141	Tub
12	106472800	106485500	12700	13646.2	964	0	76639	1700121N20Rik
11	101075950	101084100	8150	13646.2	965	0	71743	Coasy
3	68865650	68873850	8200	13640.3	966	0	68725	1110032F04Rik
5	33496000	33522150	26150	13628	967	0	672284	Nkx1-1
5	120273900	120291900	18000	13609.9	968	0	74111	Rbm19
2	180449800	180467100	17300	13609.9	969	0	108115	Slco4a1
1	9960700	9974050	13350	13555.4	970	0	69312	Ppp1r42
3	86545950	86553100	7150	13522.4	971	0	80877	Lrba
17	68831000	68844200	13200	13521.5	972	0	622645	Tmem200c
8	92954550	92968300	13750	13519	973	0	20538	Slc6a2
6	142564950	142574450	9500	13509.9	974	0	16523	Kcnj8
1	154200450	154207150	6700	13464.5	975	0	100503355	Zfp648
16	95576000	95588450	12450	13464.5	976	0	13876	Erg
17	36936150	36950700	14550	13428.2	977	0	76497	Ppp1r11
4	114662350	114670150	7800	13424.2	978	0	666048	Trabd2b
5	122042200	122055900	13700	13414.9	979	0	13048	Cux2
16	97164150	97176050	11900	13390.4	980	0	13508	Dscam
13	94590850	94601050	10200	13373.6	981	0	11774	Ap3b1
2	132938250	132948950	10700	13355.5	982	0	241639	Fermt1
6	31213550	31225000	11450	13337.5	983	0	73652	2210408F21Rik
4	135559650	135577250	17600	13337.3	984	0	230824	Grhl3
18	80576400	80612350	35950	13337.3	985	0	18018	Nfatc1
4	134011200	134021350	10150	13301	986	0	83557	Lin28a
6	126159200	126171500	12300	13282.8	987	0	18205	Ntf3
2	33699350	33723450	24100	13282.8	988	0	72543	Mvb12b
4	46528900	46541250	12350	13228.3	989	0	74735	Trim14
12	76702900	76713950	11050	13191.9	990	0	20741	Sptb
1	136255150	136265100	9950	13188.3	991	0	383563	Gpr25
5	110533950	110550600	16650	13175.6	992	0	231605	Galnt9
6	38631700	38644250	12550	13144.3	993	0	74253	Klrg2
11	16255650	16262000	6350	13137.4	994	0	211739	Vstm2a
7	79044350	79058650	14300	13129.6	995	0	11595	Acan
8	40281450	40290450	9000	13119.3	996	0	80857	Fgf20
1	134702600	134716750	14150	13116.9	997	0	20980	Syt2
17	25944400	25958500	14100	13101.1	998	0	621239	Nhlrc4
14	66908800	66916500	7700	13101.1	999	0	239157	Pnma2
19	45289950	45309400	19450	13096.5	1000	0	102465114	Mir3084-2
1	131958850	131979650	20800	13082.9	1001	0	212980	Slc45a3
7	35115550	35130900	15350	13046.6	1002	0	12606	Cebpa
3	55778750	55788550	9800	13045.9	1003	0	26422	Nbea
4	125723550	125739350	15800	13040.8	1004	0	14807	Grik3
6	143427000	143453750	26750	13010.2	1005	0	75904	4930579D09Rik
5	22738050	22753900	15850	12973.9	1006	0	330052	A930003O13Rik
3	84473500	84485250	11750	12973.9	1007	0	229474	Fhdc1
7	143972900	143985400	12500	12955.7	1008	0	210274	Shank2
14	111673650	111684300	10650	12955.7	1009	0	75409	Slitrk5
9	30939850	30948200	8350	12953.1	1010	0	30806	Adamts8
9	123672850	123684400	11550	12937.6	1011	0	12769	Ccr9
9	87011850	87019750	7900	12937.6	1012	0	382089	Ripply2
18	74058600	74068750	10150	12892.8	1013	0	225724	Mapk4
6	37295850	37305550	9700	12888	1014	0	320127	Dgki
14	121499400	121511700	12300	12887.7	1015	0	56643	Slc15a1
5	30580500	30595150	14650	12866.7	1016	0	16527	Kcnk3
2	90881700	90889850	8150	12865.8	1017	0	67445	C1qtnf4
17	14195600	14210050	14450	12846.7	1018	0	240025	Dact2
2	172933100	172946350	13250	12828.5	1019	0	12162	Bmp7
8	113841300	113852900	11600	12810.4	1020	0	208936	Adamts18
7	5050300	5059500	9200	12774	1021	0	68992	Zfp580
4	103614400	103624000	9600	12774	1022	0	13131	Dab1
2	165070450	165081950	11500	12749.8	1023	0	72211	1700025C18Rik
11	98047200	98063650	16450	12748.3	1024	0	217154	Stac2
2	93173700	93190650	16950	12737.7	1025	0	277414	Trp53i11
1	89990950	90000900	9950	12737.7	1026	0	208372	Asb18
10	75310700	75321000	10300	12737.7	1027	0	74392	Specc1l
9	27292850	27307150	14300	12719.5	1028	0	235086	Igsf9b
17	23533450	23547900	14450	12719.5	1029	0	320020	6330415G19Rik
12	51590150	51597450	7300	12719.5	1030	0	12810	Coch
2	91967800	91980700	12900	12701.3	1031	0	104418	Dgkz
18	76530450	76552000	21550	12701.3	1032	0	17126	Smad2
10	80830350	80849600	19250	12695.1	1033	0	237403	Lingo3
14	28498750	28513800	15050	12665	1034	0	22418	Wnt5a
17	36106800	36124250	17450	12628.6	1035	0	667803	H2-T-ps
7	18921850	18930900	9050	12610.5	1036	0	384569	Nova2
18	15060200	15067550	7350	12610.5	1037	0	106931	Kctd1
12	80689200	80698600	9400	12608.8	1038	0	68354	Plekhd1os
8	111884600	111893950	9350	12592.3	1039	0	56773	Chst5
7	112952600	112959100	6500	12574.1	1040	0	78748	Rassf10
6	28127050	28136500	9450	12556	1041	0	14823	Grm8
11	116105250	116112650	7400	12556	1042	0	217333	Trim47
9	20721250	20736750	15500	12552.9	1043	0	244723	Olfm2
6	3760250	3770900	10650	12552.7	1044	0	12311	Calcr
11	116914100	116926600	12500	12519.6	1045	0	268510	Mgat5b
5	127234550	127245250	10700	12501.5	1046	0	208213	Tmem132c
10	79611750	79615650	3900	12483.3	1047	0	237397	C2cd4c
7	13040400	13046600	6200	12473.2	1048	0	109889	Mzf1
2	181209400	181217250	7850	12462.2	1049	0	20811	Srms
6	53816400	53827350	10950	12428.8	1050	0	66873	Tril
17	47398650	47415350	16700	12428.8	1051	0	75462	Cimip3
11	116529800	116538600	8800	12428.8	1052	0	217342	Ube2o
9	43197450	43210000	12550	12410.6	1053	0	18988	Pou2f3
10	115583300	115591750	8450	12408.9	1054	0	14160	Lgr5
18	25748650	25767350	18700	12374.3	1055	0	108013	Celf4
11	50597450	50607700	10250	12370.4	1056	0	216725	Adamts2
4	136240950	136252300	11350	12356.1	1057	0	230837	Asap3
2	124084850	124095350	10500	12356.1	1058	0	214968	Sema6d
2	127478100	127487550	9450	12355	1059	0	56461	Kcnip3
14	119133450	119144650	11200	12337.9	1060	0	50787	Hs6st3
10	44454350	44471650	17300	12337.9	1061	0	12142	Prdm1
13	74118200	74128650	10450	12329.6	1062	0	105243	Slc9a3
14	70173100	70181750	8650	12320.1	1063	0	213019	Pdlim2
2	168271400	168287200	15800	12301.6	1064	0	241794	Kcng1
3	157564300	157573000	8700	12301.6	1065	0	19218	Ptger3
4	46036950	46046450	9500	12299.9	1066	0	21916	Tmod1
1	171187350	171200150	12800	12283.4	1067	0	66425	Pcp4l1
1	18054500	18062750	8250	12262.1	1068	0	78081	Crisp4
9	123461300	123462600	1300	12238.7	1069	0	102436	Lars2
13	69479200	69493450	14250	12210.7	1070	0	210106	Tent4a
6	83756500	83766500	10000	12187.9	1071	0	75305	Ankrd53
8	99410800	99423150	12350	12174.4	1072	0	234624	A330008L17Rik
3	45374200	45383200	9000	12156.2	1073	0	72511	2610316D01Rik
12	17321200	17333550	12350	12151.2	1074	0	68775	Atp6v1c2
8	121285650	121309650	24000	12119.9	1075	0	108148	Galnt2
2	128118400	128128500	10100	12119.9	1076	0	74121	Acoxl
19	43380750	43391600	10850	12117.5	1077	0	545291	Hpse2
18	75813200	75829900	16700	12101.7	1078	0	207259	Zbtb7c
9	78438400	78448250	9850	12083.6	1079	0	68291	Mto1
13	76051650	76059500	7850	12083.5	1080	0	238725	Gpr150
2	172039400	172046950	7550	12079.6	1081	0	228942	Cbln4
9	26729100	26740500	11400	12065.4	1082	0	76898	B3gat1
1	134229650	134241650	12000	12065.4	1083	0	11539	Adora1
19	47009850	47017000	7150	12047.2	1084	0	76952	Nt5c2
16	92492900	92502200	9300	12047.2	1085	0	76785	2410124H12Rik
13	54731750	54746500	14750	12047.2	1086	0	26913	Gprin1
2	32079800	32091200	11400	12029	1087	0	241303	Fam78a
3	82902250	82906950	4700	12029	1088	0	79235	Lrat
4	140100900	140115450	14550	12010.8	1089	0	230868	Igsf21
5	33681050	33703850	22800	11995.3	1090	0	21335	Tacc3
12	31069200	31079400	10200	11991.7	1091	0	104943	Fam110c
2	136056650	136063800	7150	11989.2	1092	0	76161	Lamp5
15	100630700	100640650	9950	11960.5	1093	0	207818	Smagp
6	77242100	77250050	7950	11958.4	1094	0	74342	Lrrtm1
1	180477400	180490450	13050	11952	1095	0	381310	Stum
12	14147200	14153600	6400	11938.2	1096	0	105005	Lratd1
15	79799650	79812800	13150	11901.8	1097	0	73340	Nptxr
7	57504100	57513350	9250	11883.7	1098	0	14402	Gabrb3
7	119178150	119190850	12700	11883.5	1099	0	209776	Gpr139
4	130299200	130314250	15050	11865.6	1100	0	14077	Fabp3
9	27786850	27798100	11250	11847.3	1101	0	330908	Opcml
15	98672100	98685250	13150	11829.1	1102	0	223881	Rnd1
4	47200550	47214300	13750	11811	1103	0	12819	Col15a1
15	100723350	100735150	11800	11811	1104	0	619313	I730030J21Rik
7	25305050	25318400	13350	11810.3	1105	0	330485	Tmem145
2	104402850	104414250	11400	11774.6	1106	0	241589	D430041D05Rik
18	34543250	34555750	12500	11773.6	1107	0	20890	Wnt8a
2	93948200	93962500	14300	11758.3	1108	0	69113	Alkbh3
2	178493000	178521900	28900	11756.5	1109	0	381409	Cdh26
2	103964150	103974600	10450	11738.3	1110	0	70986	4931422A03Rik
9	61153800	61182300	28500	11720.1	1111	0	619328	I730028E13Rik
3	96430550	96447350	16800	11720.1	1112	0	329716	BC107364
1	64730700	64741000	10300	11720.1	1113	0	14367	Fzd5
3	73047800	73060700	12900	11687.2	1114	0	386750	Slitrk3
10	117626700	117635100	8400	11667.1	1115	0	70574	Cpm
4	148269400	148291250	21850	11665.6	1116	0	242748	Disp3
1	34533800	34540400	6600	11665.6	1117	0	12627	Cfc1
11	83406950	83436300	29350	11663.5	1118	0	276952	Rasl10b
15	75882000	75897900	15900	11647.4	1119	0	66656	Eef1d
7	16942500	16951600	9100	11642.8	1120	0	434128	Pnma8b
6	117159200	117174800	15600	11632.5	1121	0	20315	Cxcl12
14	122399800	122412750	12950	11629.3	1122	0	69634	Clybl
13	58802350	58813150	10800	11629.3	1123	0	18212	Ntrk2
7	126844000	126854550	10550	11628.6	1124	0	233875	Ino80e
11	100351050	100361250	10200	11611.1	1125	0	15114	Hap1
2	13007300	13014950	7650	11592.9	1126	0	227580	C1ql3
9	86872700	86884600	11900	11574.7	1127	0	20616	Snap91
3	26329550	26336750	7200	11574.7	1128	0	192167	Nlgn1
11	35793600	35803350	9750	11574.7	1129	0	237730	Fbll1
11	107791600	107803900	12300	11548.9	1130	0	54377	Cacng4
8	23142700	23161750	19050	11536	1131	0	74561	Nkx6-3
4	133597100	133606000	8900	11520.2	1132	0	55948	Sfn
9	89619200	89626050	6850	11509.8	1133	0	209743	Minar1
17	24684100	24693800	9700	11509.6	1134	0	20974	Syngr3
2	172779550	172796250	16700	11502.1	1135	0	12162	Bmp7
13	114453200	114463400	10200	11502.1	1136	0	14313	Fst
11	77460000	77470350	10350	11502.1	1137	0	237860	Ssh2
5	150949400	150959400	10000	11483.9	1138	0	16591	Kl
7	81206850	81220650	13800	11467.9	1139	0	18584	Pde8a
7	122284000	122294650	10650	11447.6	1140	0	18751	Prkcb
13	38341350	38349000	7650	11447.6	1141	0	12161	Bmp6
4	102083800	102090850	7050	11411.2	1142	0	18578	Pde4b
7	109776550	109787850	11300	11393	1143	0	78593	Nrip3
11	33839200	33855550	16350	11387	1144	0	70357	Kcnip1
X	101379150	101387250	8100	11367.7	1145	0	14618	Gjb1
8	84551150	84571450	20300	11356.7	1146	0	12286	Cacna1a
6	143830750	143863000	32250	11356.7	1147	0	20678	Sox5
17	34259850	34265950	6100	11356.7	1148	0	14961	H2-Ab1
8	119447050	119456150	9100	11338.2	1149	0	117148	Necab2
18	77182250	77189600	7350	11319.5	1150	0	225742	St8sia5
15	55305650	55314550	8900	11299.8	1151	0	12818	Col14a1
1	87123550	87130100	6550	11287.6	1152	0	11648	Akp3
12	81624100	81637050	12950	11284	1153	0	69480	Ttc9
1	124040100	124051550	11450	11247.7	1154	0	269109	Dpp10
11	84635100	84646850	11750	11247.7	1155	0	78471	1700109G15Rik
5	147396150	147403850	7700	11229.5	1156	0	14255	Flt3
13	72284600	72309000	24400	11229.5	1157	0	328287	Gm20554
11	76994300	77008400	14100	11229.5	1158	0	15567	Slc6a4
9	21957550	21966950	9400	11223	1159	0	66962	Swsap1
9	46437700	46447800	10100	11211.3	1160	0	74361	4931429L15Rik
1	75215400	75224800	9400	11211.3	1161	0	381272	A630095N17Rik
1	132285550	132309400	23850	11209.7	1162	0	213417	Klhdc8a
15	5239200	5250250	11050	11169.5	1163	0	19219	Ptger4
12	113134750	113158500	23750	11156.8	1164	0	68337	Crip2
X	103317150	103326050	8900	11138.7	1165	0	12592	Cdx4
9	47527100	47540850	13750	11120.5	1166	0	54725	Cadm1
12	106170350	106180700	10350	11120.5	1167	0	22367	Vrk1
11	31364350	31378600	14250	11120.5	1168	0	20856	Stc2
7	19174550	19182150	7600	11112.2	1169	0	724063	Mir330
15	75560550	75569100	8550	11096.5	1170	0	23934	Ly6h
10	81339500	81351400	11900	11094.3	1171	0	209047	Gipc3
17	14274500	14285600	11100	11084.1	1172	0	64074	Smoc2
7	29164500	29175500	11000	11075.1	1173	0	57296	Psmd8
5	129579950	129592350	12400	11047.8	1174	0	23948	Mmp17
5	111407250	111425650	18400	11047.8	1175	0	433938	Mn1
11	69231750	69241700	9950	11047.8	1176	0	14919	Gucy2e
8	88446500	88460400	13900	11046.7	1177	0	93960	Nkd1
14	65419700	65430750	11050	11029.6	1178	0	18155	Pnoc
13	12097550	12110250	12700	11029.6	1179	0	20191	Ryr2
6	28973950	28988100	14150	11011.5	1180	0	387237	Mir129-1
18	45557550	45564300	6750	11011.5	1181	0	140492	Kcnn2
7	35579350	35589350	10000	10975.1	1182	0	245886	Ankrd27
11	113614900	113622350	7450	10971.1	1183	0	69806	Slc39a11
12	108696650	108706550	9900	10970.2	1184	0	70059	Degs2
5	112472250	112493350	21100	10960.3	1185	0	56747	Sez6l
12	67218200	67226400	8200	10958.5	1186	0	320772	Mdga2
2	37779050	37797600	18550	10956.9	1187	0	241324	Crb2
7	143498100	143505600	7500	10952.9	1188	0	22113	Phlda2
11	78921700	78928900	7200	10945.9	1189	0	18126	Nos2
14	55507250	55525550	18300	10938.8	1190	0	268747	Carmil3
4	135680800	135691750	10950	10923.2	1191	0	242700	Ifnlr1
1	78133600	78145750	12150	10902.4	1192	0	18505	Pax3
6	94680400	94706200	25800	10901.5	1193	0	16206	Lrig1
16	94119200	94130250	11050	10866.1	1194	0	20465	Sim2
13	70839100	70845850	6750	10866.1	1195	0	271127	Adamts16
6	103504450	103515950	11500	10856.9	1196	0	12661	Chl1
9	45034250	45046250	12000	10856.5	1197	0	14012	Mpzl2
19	44880800	44897900	17100	10847.9	1198	0	102465114	Mir3084-2
12	70342600	70348400	5800	10847.9	1199	0	94090	Trim9
9	54760800	54771350	10550	10793.4	1200	0	12903	Crabp1
7	19300950	19309850	8900	10790.3	1201	0	14282	Fosb
1	172546850	172566650	19800	10775.2	1202	0	71319	4933439K11Rik
8	119695750	119708300	12550	10775.1	1203	0	69047	Atp2c2
8	84700950	84708700	7750	10770.3	1204	0	18032	Nfix
6	115358150	115363750	5600	10757.1	1205	0	19016	Pparg
16	22651150	22659250	8100	10757.1	1206	0	110197	Dgkg
13	73530950	73539550	8600	10757.1	1207	0	13162	Slc6a3
7	105422250	105433950	11700	10702.6	1208	0	12426	Cckbr
3	116246900	116256000	9100	10702.6	1209	0	64378	Gpr88
1	87505950	87515550	9600	10702.6	1210	0	53972	Ngef
10	80010500	80021750	11250	10684.4	1211	0	70719	Arhgap45
15	78197250	78209150	11900	10673.5	1212	0	19293	Pvalb
8	106505050	106515150	10100	10666.2	1213	0	12560	Cdh3
8	124743350	124755950	12600	10661.2	1214	0	69627	Fam89a
7	113764200	113771050	6850	10629.9	1215	0	233744	Spon1
1	170905850	170915650	9800	10629.9	1216	0	435653	Fcrlb
1	93097100	93104500	7400	10629.9	1217	0	16560	Kif1a
14	56361100	56372600	11500	10625.9	1218	0	192113	Atp12a
18	77791250	77798350	7100	10623.7	1219	0	619308	F830208F22Rik
6	92235950	92250550	14600	10611.7	1220	0	22044	Trh
5	24342350	24356750	14400	10605.1	1221	0	16511	Kcnh2
6	110642400	110650300	7900	10603.6	1222	0	108073	Grm7
17	28136100	28152550	16450	10593.5	1223	0	268935	Scube3
6	22285400	22290500	5100	10581.9	1224	0	93735	Wnt16
11	70315450	70332500	17050	10557.2	1225	0	11685	Alox12e
4	106620850	106629150	8300	10531.5	1226	0	230576	Ttc22
7	138392650	138405750	13100	10523	1227	0	70571	Tcerg1l
19	36051700	36062000	10300	10520.8	1228	0	15566	Htr7
7	45359150	45373650	14500	10518.1	1229	0	76787	Ppfia3
6	114394250	114404850	10600	10502.7	1230	0	15465	Hrh1
17	45213750	45240850	27100	10500.5	1231	0	109115	Supt3
17	56746750	56758150	11400	10492.4	1232	0	18188	Nrtn
6	85477400	85490850	13450	10477.6	1233	0	330369	Fbxo41
7	19462850	19478550	15700	10471.6	1234	0	74463	Exoc3l2
13	72813150	72820900	7750	10430.1	1235	0	78446	D730050B12Rik
19	60465100	60472600	7500	10430	1236	0	226278	Prlhr
19	41200600	41210100	9500	10430	1237	0	24087	Tll2
X	155620000	155628100	8100	10425.1	1238	0	211612	Ptchd1
7	66422250	66430500	8250	10420.3	1239	0	56847	Aldh1a3
1	135075750	135088300	12550	10411.8	1240	0	329252	Lgr6
8	11307100	11319250	12150	10393.7	1241	0	12827	Col4a2
17	25250000	25260300	10300	10357.3	1242	0	545192	Baiap3
8	34801600	34815250	13650	10353.4	1243	0	319520	Dusp4
3	36518400	36525750	7350	10339.1	1244	0	100503068	Smim43
8	122332650	122348350	15700	10321	1245	0	22761	Zfpm1
4	138454900	138470050	15150	10303.3	1246	0	66259	Camk2n1
12	61520100	61527650	7550	10302.3	1247	0	238205	Lrfn5
8	84910000	84922350	12350	10282	1248	0	56527	Mast1
3	53652250	53659700	7450	10266.5	1249	0	242022	Frem2
12	54060800	54071950	11150	10266.3	1250	0	27386	Npas3
6	120489100	120499800	10700	10247.6	1251	0	94047	Tmem121b
8	123114050	123121700	7650	10242	1252	0	108148	Galnt2
1	24581050	24590800	9750	10230.1	1253	0	12823	Col19a1
12	112674400	112683750	9350	10230.1	1254	0	382639	Zbtb42
19	5443600	5452100	8500	10211.9	1255	0	14283	Fosl1
13	55417550	55424500	6950	10211.9	1256	0	58992	F12
14	68121200	68131050	9850	10176.8	1257	0	18040	Nefm
5	30616350	30631950	15600	10175.6	1258	0	16527	Kcnk3
12	105330700	105346000	15300	10175.6	1259	0	69952	Tunar
1	176270900	176280050	9150	10157.4	1260	0	319455	Pld5
11	101771350	101791700	20350	10157.4	1261	0	18612	Etv4
7	101449550	101462650	13100	10154.1	1262	0	207728	Pde2a
18	38006950	38030300	23350	10139.3	1263	0	106952	Arap3
3	13468500	13475750	7250	10134.7	1264	0	76897	Ralyl
4	133240000	133259150	19150	10121.1	1265	0	53608	Map3k6
15	98626450	98638150	11700	10121.1	1266	0	12297	Cacnb3
2	164989000	165005550	16550	10115	1267	0	57138	Slc12a5
14	61269850	61279200	9350	10112.6	1268	0	24053	Sgcg
17	35257650	35268000	10350	10107.9	1269	0	14980	H2-L
12	29529700	29539900	10200	10102.9	1270	0	17933	Myt1l
9	99352300	99364700	12400	10084.7	1271	0	272636	Esyt3
7	19275650	19285200	9550	10084.7	1272	0	232941	Ppm1n
6	18029050	18036450	7400	10080.2	1273	0	22413	Wnt2
8	119896550	119904100	7550	10066.6	1274	0	22224	Usp10
8	121246200	121269100	22900	10065.7	1275	0	108148	Galnt2
6	85404500	85412700	8200	10030.2	1276	0	384452	Noto
4	44656600	44675800	19200	10030.2	1277	0	18507	Pax5
7	139891900	139902850	10950	10012.1	1278	0	76484	Kndc1
11	102390450	102403250	12800	10005.8	1279	0	68066	Slc25a39
19	41647200	41669000	21800	9999.17	1280	0	20562	Slit1
2	158548650	158562100	13450	9993.9	1281	0	545481	Arhgap40
5	35754200	35761500	7300	9993.08	1282	0	231148	Ablim2
1	78303800	78314400	10600	9978.9	1283	0	433323	Sgpp2
5	146582250	146589950	7700	9975.72	1284	0	14738	Gpr12
7	28540650	28550050	9400	9966	1285	0	68416	Sycn
12	81776100	81787650	11550	9957.33	1286	0	338372	Map3k9
4	63210950	63221150	10200	9941.56	1287	0	373864	Col27a1
6	53282950	53293250	10300	9903.04	1288	0	231991	Creb5
4	46594950	46607800	12850	9893.96	1289	0	381605	Tbc1d2
14	115089050	115095250	6200	9884.87	1290	0	103978	Gpc5
7	25362250	25373350	11100	9880.19	1291	0	72383	Cnfn
12	82615150	82623450	8300	9867.61	1292	0	50779	Rgs6
2	153100050	153115350	15300	9866.7	1293	0	15162	Hck
6	36384750	36395300	10550	9848.53	1294	0	319472	9330158H04Rik
16	31930750	31938600	7850	9840.72	1295	0	239827	Pigz
11	119386650	119397600	10950	9831.4	1296	0	672511	Rnf213
14	72527450	72536350	8900	9830.36	1297	0	319448	Fndc3a
7	25126900	25141300	14400	9824.5	1298	0	18987	Pou2f2
10	79712550	79724100	11550	9809.01	1299	0	15166	Hcn2
4	129101900	129112650	10750	9803.65	1300	0	66260	Tmem54
13	10354250	10364850	10600	9794.02	1301	0	12671	Chrm3
7	114714250	114722900	8650	9775.85	1302	0	116903	Calcb
5	119079950	119091400	11450	9775.85	1303	0	73477	1700081H04Rik
5	24375300	24391750	16450	9775.85	1304	0	213948	Atg9b
2	132874800	132885850	11050	9771.76	1305	0	320974	Lrrn4
17	35390200	35399600	9400	9766.26	1306	0	15016	H2-Q5
12	73539650	73552250	12600	9765.67	1307	0	73644	2210039B01Rik
18	76054550	76068250	13700	9757.68	1308	0	207259	Zbtb7c
11	96451200	96470000	18800	9757.68	1309	0	78473	Skap1
1	165838750	165855700	16950	9739.51	1310	0	12503	Cd247
10	80926450	80942050	15600	9731.06	1311	0	17873	Gadd45b
7	73369150	73380450	11300	9716.75	1312	0	319783	A730056A06Rik
9	47346700	47374000	27300	9703.16	1313	0	54725	Cadm1
11	75790950	75799600	8650	9684.99	1314	0	13447	Doc2b
10	93828350	93837300	8950	9681.18	1315	0	327799	Usp44
6	138417300	138429150	11850	9669.96	1316	0	319702	A830011K09Rik
16	28441200	28451100	9900	9648.65	1317	0	14167	Fgf12
7	143440150	143448450	8300	9645.38	1318	0	12577	Cdkn1c
13	103329500	103338650	9150	9640.02	1319	0	328329	Mast4
3	158558150	158563100	4950	9630.48	1320	0	242274	Lrrc7
14	118431350	118443600	12250	9628.85	1321	0	73306	1700044C05Rik
14	57128950	57141400	12450	9628.85	1322	0	14623	Gjb6
5	112160100	112187450	27350	9612.31	1323	0	75569	1700028D13Rik
13	49139200	49155800	16600	9612.31	1324	0	75607	Wnk2
15	84060850	84078800	17950	9607.22	1325	0	77627	Efcab6
5	53206100	53221650	15550	9594.14	1326	0	231238	Sel1l3
17	57145600	57156000	10400	9590.41	1327	0	21948	Cd70
4	137713500	137731450	17950	9589.64	1328	0	110351	Rap1gap
2	133547850	133556250	8400	9575.97	1329	0	12156	Bmp2
18	84715550	84723500	7950	9575.97	1330	0	240479	Dipk1c
6	113278650	113288500	9850	9575.92	1331	0	97287	Mtmr14
15	76225850	76235750	9900	9559.34	1332	0	671535	Parp10
8	27171450	27179300	7850	9557.8	1333	0	75767	Rab11fip1
2	121287300	121307000	19700	9557.8	1334	0	17754	Map1a
1	5913750	5920050	6300	9557.8	1335	0	226304	Npbwr1
10	122447000	122450600	3600	9557.8	1336	0	54140	Avpr1a
14	57052000	57059800	7800	9556.21	1337	0	14611	Gja3
7	19391700	19408400	16700	9539.63	1338	0	232943	Klc3
17	25806150	25822350	16200	9539.63	1339	0	214931	Fbxl16
4	125255250	125280650	25400	9539.08	1340	0	230738	Zc3h12a
6	72227600	72244500	16900	9534.45	1341	0	71093	Atoh8
4	106460200	106465800	5600	9533.95	1342	0	100102	Pcsk9
17	80940700	80948000	7300	9521.46	1343	0	68027	Tmem178
11	80150650	80160250	9600	9521.46	1344	0	216991	Adap2
3	5860250	5861100	850	9521	1345	0	19302	Pex2
11	114059850	114074100	14250	9515.73	1346	0	237979	Sdk2
14	23995900	24009050	13150	9503.29	1347	0	78019	4930519K11Rik
12	100894300	100905700	11400	9503.29	1348	0	238377	Gpr68
12	75172750	75182250	9500	9485.12	1349	0	238271	Kcnh5
8	11986800	12008850	22050	9482.39	1350	0	75528	Tex29
3	152663000	152673200	10200	9466.94	1351	0	99542	AI115009
19	43437850	43444700	6850	9466.94	1352	0	83674	Cnnm1
13	53791950	53819400	27450	9466.94	1353	0	78550	E130119H09Rik
4	124570300	124583700	13400	9465.13	1354	0	108809	4933407E24Rik
6	145860000	145870300	10300	9448.77	1355	0	79362	Bhlhe41
11	3995300	4002450	7150	9437.55	1356	0	53897	Gal3st1
8	106866500	106875050	8550	9430.6	1357	0	15118	Has3
18	66285050	66295950	10900	9430.6	1358	0	320924	Ccbe1
X	146959250	146966500	7250	9411.93	1359	0	15560	Htr2c
9	87141950	87149750	7800	9407.34	1360	0	244958	Mrap2
15	102001800	102014700	12900	9399.35	1361	0	16691	Krt8
8	92454400	92474000	19600	9398.17	1362	0	54352	Irx5
11	98382900	98394550	11650	9393.17	1363	0	320655	Pgap3
9	44283500	44292000	8500	9391.81	1364	0	192663	Abcg4
4	155649950	155659650	9700	9376.09	1365	0	76580	Mib2
4	117918950	117931450	12500	9376.09	1366	0	11876	Artn
8	122456150	122467700	11550	9369.82	1367	0	68718	Rnf166
8	13431400	13442400	11000	9357.92	1368	0	272465	Tmem255b
9	62673150	62684000	10850	9357.92	1369	0	319480	Itga11
9	23216500	23229300	12800	9357.92	1370	0	73230	Bmper
1	136048500	136057100	8600	9357.92	1371	0	226439	Ascl5
4	136828450	136850600	22150	9353.7	1372	0	13844	Ephb2
7	19019250	19025400	6150	9347.15	1373	0	68188	Sympk
5	141238100	141248550	10450	9336.07	1374	0	330222	Sdk1
2	168836350	168845350	9000	9321.58	1375	0	22722	Zfp64
15	89553750	89559750	6000	9321.58	1376	0	58234	Shank3
12	111669050	111675800	6750	9303.41	1377	0	12709	Ckb
10	30839800	30848400	8600	9300.73	1378	0	15214	Hey2
17	46294100	46303050	8950	9291.37	1379	0	106565	Dlk2
14	70453700	70468650	14950	9285.24	1380	0	105653	Phyhip
6	105673500	105682000	8500	9267.07	1381	0	269784	Cntn4
17	25566550	25576100	9550	9264.52	1382	0	72834	Cerox1
2	180221700	180232550	10850	9258.84	1383	0	16776	Lama5
15	102353950	102369900	15950	9257.8	1384	0	170574	Sp7
11	98442800	98461300	18500	9254.57	1385	0	14786	Grb7
2	153024050	153039500	15450	9248.9	1386	0	228787	Xkr7
5	37961000	37973000	12000	9248.35	1387	0	102637176	Gm20052
3	108216450	108229700	13250	9248.35	1388	0	17306	Sypl2
7	129250950	129262400	11450	9219.82	1389	0	381925	Plpp4
6	14893950	14905000	11050	9212.55	1390	0	114142	Foxp2
18	80488550	80505850	17300	9212.55	1391	0	67655	Ctdp1
10	69392300	69402550	10250	9212.55	1392	0	11735	Ank3
1	152951500	152957200	5700	9194.38	1393	0	226518	Nmnat2
3	54911950	54919600	7650	9184.62	1394	0	329641	Sertm1
5	140603100	140614250	11150	9174.03	1395	0	16848	Lfng
1	69100700	69112200	11500	9158.04	1396	0	13869	Erbb4
17	8337900	8345400	7500	9158.04	1397	0	320111	Prr18
15	95522900	95529600	6700	9148.41	1398	0	54003	Nell2
4	154168400	154178100	9700	9147	1399	0	230971	Megf6
5	98851450	98859300	7850	9139.87	1400	0	110075	Bmp3
4	127163700	127174500	10800	9121.7	1401	0	242667	Dlgap3
2	156418250	156429500	11250	9121.7	1402	0	13821	Epb41l1
3	118427150	118438750	11600	9109.3	1403	0	387155	Mir137
4	125580750	125603600	22850	9103.53	1404	0	14807	Grik3
11	84565150	84588100	22950	9102.21	1405	0	78365	Lhx1os
2	180637450	180642600	5150	9098.9	1406	0	277353	Tcfl5
9	98030100	98038650	8550	9085.36	1407	0	64085	Clstn2
1	128586900	128596700	9800	9085.36	1408	0	12767	Cxcr4
11	79585850	79596450	10600	9085.36	1409	0	268451	Rab11fip4
8	70860000	70872400	12400	9085.18	1410	0	84036	Kcnn1
2	160906600	160917700	11100	9077.32	1411	0	280635	Emilin3
11	72260750	72273300	12550	9072.19	1412	0	73366	1700051A21Rik
17	30896650	30908500	11850	9067.19	1413	0	224671	Btbd9
1	131233900	131246850	12950	9066.14	1414	0	54354	Rassf5
17	56464400	56478800	14400	9052.56	1415	0	19280	Ptprs
5	36146900	36176850	29950	9046.29	1416	0	81840	Sorcs2
9	16499500	16505100	5600	9032.62	1417	0	270120	Fat3
9	47397200	47413650	16450	9030.85	1418	0	54725	Cadm1
17	69967650	69976450	8800	8994.51	1419	0	224997	Dlgap1
8	104166050	104175050	9000	8989.87	1420	0	65115	Bean1
7	65151200	65161250	10050	8976.34	1421	0	70638	Entrep2
14	55759950	55770800	10850	8976.34	1422	0	57260	Ltb4r2
13	42297100	42307900	10800	8974.2	1423	0	13614	Edn1
1	185452350	185459100	6750	8969.57	1424	0	226781	Slc30a10
12	103310050	103328300	18250	8958.16	1425	0	65256	Asb2
14	8313300	8321750	8450	8953.35	1426	0	268709	Fam107a
1	172048100	172060700	12600	8940.77	1427	0	18071	Nhlh1
16	91160800	91179400	18600	8924.46	1428	0	50913	Olig2
X	73633850	73644250	10400	8921.82	1429	0	75590	Dusp9
6	100544450	100568250	23800	8921.82	1430	0	72171	Shq1
12	78903200	78917400	14200	8903.15	1431	0	27260	Plek2
19	37231250	37240000	8750	8894.75	1432	0	102465114	Mir3084-2
5	92382850	92397150	14300	8885.48	1433	0	109979	Art3
6	97055200	97064700	9500	8881.48	1434	0	320701	Tafa4
2	129691350	129703800	12450	8867.77	1435	0	18610	Pdyn
8	89000400	89016150	15750	8867.31	1436	0	102465899	Mir8110
17	90451000	90459150	8150	8856.77	1437	0	18189	Nrxn1
8	122282400	122290200	7800	8853.05	1438	0	22761	Zfpm1
18	36279500	36287250	7750	8852.64	1439	0	19290	Pura
2	152902900	152919600	16700	8851.05	1440	0	228785	Mylk2
7	24606350	24615550	9200	8849.14	1441	0	66071	Ethe1
12	33926500	33933450	6950	8849.14	1442	0	114712	Ferd3l
4	120642650	120653350	10700	8830.97	1443	0	56222	Cited4
2	113212750	113220300	7550	8830.97	1444	0	20192	Ryr3
7	81855400	81864650	9250	8820.61	1445	0	107769	Tm6sf1
1	158350350	158365050	14700	8813.07	1446	0	240843	Brinp2
9	37138500	37154600	16100	8812.8	1447	0	208076	Pknox2
6	121208500	121221900	13400	8812.8	1448	0	53857	Tuba8
12	17171450	17180300	8850	8812.8	1449	0	382571	Kcnf1
8	72318400	72326650	8250	8800.03	1450	0	16598	Klf2
19	38095150	38102600	7450	8794.63	1451	0	107221	Ffar4
5	47982700	47989450	6750	8794.17	1452	0	20563	Slit2
4	148765900	148780150	14250	8758.29	1453	0	69743	Casz1
5	134942500	134954400	11900	8758.29	1454	0	79565	Mettl27
2	92910200	92919200	9000	8758.29	1455	0	80976	Syt13
12	111482050	111492050	10000	8758.29	1456	0	212539	Gm266
4	49841650	49850500	8850	8740.12	1457	0	242443	Grin3a
5	72501100	72506400	5300	8740.12	1458	0	53419	Corin
4	120025200	120040450	15250	8698.1	1459	0	16656	Hivep3
17	37193100	37203200	10100	8695.96	1460	0	258219	Or2i1
15	80668900	80689100	20200	8685.6	1461	0	213956	Fam83f
6	30953900	30968100	14200	8683.65	1462	0	619665	Klf14
8	27080250	27095150	14900	8680.38	1463	0	78560	Adgra2
13	95438050	95447600	9550	8665.75	1464	0	12919	Crhbp
17	25424650	25441600	16950	8649.26	1465	0	58226	Cacna1h
3	157521350	157535850	14500	8645.4	1466	0	53861	Zranb2
18	80291050	80301100	10050	8631.09	1467	0	66943	Slc66a2
6	126733150	126746400	13250	8623.46	1468	0	16494	Kcna6
5	147217400	147231550	14150	8612.92	1469	0	70147	Plut
4	154559500	154578250	18750	8608.7	1470	0	70673	Prdm16
17	35192200	35206650	14450	8594.75	1471	0	21926	Tnf
3	141924050	141941950	17900	8589.48	1472	0	12167	Bmpr1b
13	113027600	113036600	9000	8585.76	1473	0	735309	Mir449c
14	33346500	33360900	14400	8583.85	1474	0	239027	Arhgap22
6	144199150	144213000	13850	8576.58	1475	0	20678	Sox5
4	89685550	89692650	7100	8576.58	1476	0	242523	Dmrta1
1	34674250	34682100	7850	8576.58	1477	0	226970	Arhgef4
18	86391550	86399400	7850	8558.41	1478	0	246317	Neto1
17	87741900	87749650	7750	8558.41	1479	0	210741	Kcnk12
15	79038750	79046300	7550	8558.41	1480	0	26912	Gcat
5	120645500	120653550	8050	8540.24	1481	0	19415	Rasal1
17	73704200	73717550	13350	8540.24	1482	0	71685	Galnt14
12	79129200	79133850	4650	8539.69	1483	0	11847	Arg2
11	49898500	49905450	6950	8503.9	1484	0	74563	Rasgef1c
1	146492350	146499900	7550	8485.73	1485	0	215378	Brinp3
17	69435100	69445100	10000	8485.73	1486	0	320722	Akain1
10	121307900	121316850	8950	8485.73	1487	0	74694	Tbc1d30
7	64499000	64507250	8250	8484.64	1488	0	11784	Apba2
6	147260550	147270150	9600	8482.73	1489	0	19227	Pthlh
5	38314100	38324050	9950	8481.18	1490	0	13492	Drd5
7	48880300	48901950	21650	8479.96	1491	0	108961	E2f8
6	125370200	125381350	11150	8479.77	1492	0	213522	Plekhg6
6	127147800	127156500	8700	8479.73	1493	0	77558	9330179D12Rik
5	137285850	137293700	7850	8447.89	1494	0	11423	Ache
9	57691600	57703650	12050	8445.89	1495	0	13076	Cyp1a1
2	114010200	114015750	5550	8431.21	1496	0	320846	A530058N18Rik
18	34858250	34866600	8350	8431.21	1497	0	13653	Egr1
19	24552500	24559550	7050	8431.21	1498	0	18719	Pip5k1b
12	112909150	112929550	20400	8431.21	1499	0	16450	Jag2
11	84754400	84778400	24000	8431.21	1500	0	78471	1700109G15Rik
2	25611400	25619650	8250	8413.04	1501	0	77058	Ccdc183
7	130256200	130269000	12800	8376.7	1502	0	14183	Fgfr2
1	92760500	92784750	24250	8376.7	1503	0	14733	Gpc1
6	148440100	148448050	7950	8374.43	1504	0	387314	Tmtc1
17	57057300	57069200	11900	8372.57	1505	0	70785	Dennd1c
15	74664100	74678050	13950	8357.53	1506	0	11838	Arc
8	70795200	70810900	15700	8340.22	1507	0	546071	Mast3
2	82050300	82056200	5900	8322.19	1508	0	241514	Zfp804a
8	25096450	25105350	8900	8309.24	1509	0	83436	Plekha2
5	117407900	117418450	10550	8304.02	1510	0	333050	Ksr2
17	8512200	8529750	17550	8302.29	1511	0	23984	Pde10a
14	108910550	108916350	5800	8300.11	1512	0	76965	Slitrk1
8	125231300	125249100	17800	8285.85	1513	0	244667	Disc1
8	123401900	123415750	13850	8285.85	1514	0	66855	Tcf25
7	93076450	93083850	7400	8280.85	1515	0	100040298	Gm15501
X	98147500	98152850	5350	8267.68	1516	0	11835	Ar
19	19105200	19113000	7800	8249.51	1517	0	225998	Rorb
17	36078900	36087050	8150	8249.51	1518	0	14963	H2-Bl
6	86186450	86200450	14000	8247.01	1519	0	21802	Tgfa
6	48738400	48745050	6650	8238.47	1520	0	317757	Gimap5
17	71305800	71315050	9250	8220.07	1521	0	246707	Emilin2
18	65870250	65877550	7300	8213.17	1522	0	225642	Grp
7	121861500	121869150	7650	8194.99	1523	0	20277	Scnn1b
4	154699950	154717450	17500	8192.63	1524	0	73353	Actrt2
6	94751900	94775050	23150	8176.82	1525	0	16206	Lrig1
2	13789500	13796450	6950	8176.82	1526	0	241230	St8sia6
11	69796250	69808650	12400	8161.29	1527	0	380705	Tmem102
2	160575350	160589150	13800	8159.02	1528	0	21969	Top1
7	75301800	75312600	10800	8158.65	1529	0	68954	1500012K07Rik
14	55107900	55119200	11300	8158.65	1530	0	319984	Jph4
7	44304200	44315050	10850	8155.79	1531	0	243961	Shank1
5	147952450	147962100	9650	8122.31	1532	0	77521	Mtus2
1	167587650	167603000	15350	8122.31	1533	0	20183	Rxrg
4	84668000	84678600	10600	8121.49	1534	0	242509	Bnc2
2	155768100	155775400	7300	8114.23	1535	0	17391	Mmp24
7	45866550	45874500	7950	8104.14	1536	0	68137	Kdelr1
15	76662300	76672700	10400	8082.97	1537	0	73062	Ppp1r16a
18	81158300	81169800	11500	8067.8	1538	0	20689	Sall3
1	74091300	74105550	14250	8064.35	1539	0	21961	Tns1
7	84081350	84089450	8100	8055.35	1540	0	80982	Cemip
11	100140200	100149150	8950	8049.63	1541	0	16669	Krt19
19	5738450	5761000	22550	8048.27	1542	0	78891	Scyl1
17	47434750	47442750	8000	8031.46	1543	0	75462	Cimip3
12	37105650	37109950	4300	8031.46	1544	0	17286	Meox2
10	29142200	29150350	8150	8031.46	1545	0	67412	Soga3
14	44856300	44862000	5700	8031.37	1546	0	19214	Ptgdr
6	116456450	116465000	8550	8027.6	1547	0	11689	Alox5
8	87654050	87667650	13600	8013.29	1548	0	94187	Zfp423
8	84735650	84747450	11800	8013.29	1549	0	18032	Nfix
2	121802900	121810850	7950	8013.29	1550	0	228564	Frmd5
2	102655700	102664250	8550	8013.29	1551	0	20511	Slc1a2
7	137250800	137261950	11150	8009.11	1552	0	13593	Ebf3
8	122739000	122757650	18650	8003.38	1553	0	108148	Galnt2
1	173363250	173371650	8400	7982.85	1554	0	94332	Cadm3
5	135085300	135095600	10300	7976.95	1555	0	58805	Mlxipl
16	93677350	93686550	9200	7976.95	1556	0	109857	Cbr3
15	92392950	92400150	7200	7976.95	1557	0	239618	Pdzrn4
19	10384200	10396450	12250	7973.08	1558	0	54525	Syt7
10	89340350	89348150	7800	7957.23	1559	0	320091	Ano4
5	112419600	112436150	16550	7956.32	1560	0	56747	Sez6l
8	80609850	80615900	6050	7954.73	1561	0	333315	Frem3
8	71504350	71513450	9100	7940.6	1562	0	84094	Plvap
16	60603650	60609700	6050	7928.61	1563	0	13840	Epha6
4	138547750	138562300	14550	7924.8	1564	0	75718	Vwa5b1
11	30019350	30026650	7300	7922.43	1565	0	237711	Eml6
15	31294050	31301450	7400	7912.26	1566	0	67434	Ankrd33b
9	114053050	114061650	8600	7904.26	1567	0	382111	Susd5
15	66280250	66291850	11600	7904.26	1568	0	110862	Kcnq3
13	43781050	43793050	12000	7904.26	1569	0	12522	Cd83
6	115988700	115995500	6800	7886.09	1570	0	67784	Plxnd1
15	76714550	76727950	13400	7886.09	1571	0	378937	Lrrc24
1	171434550	171442600	8050	7875.87	1572	0	16456	F11r
2	152623250	152633150	9900	7867.92	1573	0	19700	Rem1
15	85730850	85738250	7400	7867.65	1574	0	19013	Ppara
11	94470500	94481700	11200	7864.92	1575	0	217116	Spata20
13	99895500	99901750	6250	7864.2	1576	0	27220	Cartpt
1	153647550	153663200	15650	7849.75	1577	0	67792	Rgs8
4	138683100	138697900	14800	7846.07	1578	0	212190	Ubxn10
8	76896150	76906350	10200	7831.58	1579	0	110784	Nr3c2
3	152977050	152986950	9900	7831.58	1580	0	329777	Pigk
9	103758300	103765350	7050	7813.41	1581	0	81907	Tmem108
10	128929650	128937250	7600	7795.24	1582	0	16404	Itga7
6	54321450	54331750	10300	7794.19	1583	0	78004	Prr15
4	137674700	137685300	10600	7777.07	1584	0	110351	Rap1gap
5	69337350	69344650	7300	7777.07	1585	0	243043	Kctd8
10	61589750	61599150	9400	7777.07	1586	0	237362	Npffr1
13	105442200	105449000	6800	7758.9	1587	0	15550	Htr1a
5	64154550	64163200	8650	7758.26	1588	0	57915	Tbc1d1
9	44040800	44051300	10500	7756.04	1589	0	21838	Thy1
10	77673000	77680500	7500	7755.72	1590	0	252974	Tspear
18	64262000	64267850	5850	7738.59	1591	0	73588	St8sia3os
14	52321700	52334950	13250	7721.87	1592	0	50524	Sall2
11	89295000	89304950	9950	7719.1	1593	0	18121	Nog
6	51428900	51440150	11250	7704.38	1594	0	18025	Nfe2l3
2	49785000	49791700	6700	7704.38	1595	0	71897	Lypd6b
17	83537700	83550450	12750	7704.38	1596	0	20463	Cox7a2l
11	121153550	121161800	8250	7704.38	1597	0	217369	Uts2r
7	49243050	49251200	8150	7686.21	1598	0	78286	Nav2
4	82530600	82544500	13900	7686.21	1599	0	18028	Nfib
11	115361100	115377600	16500	7686.21	1600	0	217310	Hid1
1	164454450	164464100	9650	7667	1601	0	11931	Atp1b1
3	132082750	132088950	6200	7666.68	1602	0	56811	Dkk2
6	119102350	119115100	12750	7657.19	1603	0	12288	Cacna1c
5	101760150	101773050	12900	7649.87	1604	0	74596	Cds1
15	43166550	43173600	7050	7649.87	1605	0	239405	Rspo2
1	132733800	132744250	10450	7648.69	1606	0	269116	Nfasc
9	21011200	21019900	8700	7644.88	1607	0	15894	Icam1
11	111555300	111571550	16250	7637.38	1608	0	16518	Kcnj2
10	21155900	21166200	10300	7631.7	1609	0	17863	Myb
8	118280250	118290650	10400	7616.89	1610	0	12554	Cdh13
1	14502200	14512300	10100	7595.36	1611	0	14048	Eya1
8	50913350	50921000	7650	7594.72	1612	0	100039954	Gm2516
8	114201600	114208450	6850	7577.19	1613	0	270097	Vat1l
9	51757000	51769900	12900	7577.19	1614	0	244867	Arhgap20
3	83758800	83774050	15250	7575.1	1615	0	20319	Sfrp2
5	143152650	143162800	10150	7572.37	1616	0	100042605	Rbakdn
3	142163300	142175500	12200	7559.02	1617	0	12167	Bmpr1b
11	95189350	95212100	22750	7546.98	1618	0	320453	Dlx4os
13	98427700	98439300	11600	7540.85	1619	0	70090	2310005E17Rik
X	99816350	99826200	9850	7522.68	1620	0	620592	Nalf2
7	3300750	3309700	8950	7522.68	1621	0	50918	Myadm
4	114814150	114827550	13400	7522.68	1622	0	433746	Gm12830
12	101022550	101030250	7700	7522.68	1623	0	68339	Ccdc88c
9	42934100	42948300	14200	7504.51	1624	0	110637	Grik4
6	128295050	128303350	8300	7504.51	1625	0	21679	Tead4
5	121921150	121931200	10050	7504.51	1626	0	13048	Cux2
10	45467700	45474750	7050	7504.51	1627	0	380669	Lin28b
4	85199400	85208300	8900	7499.51	1628	0	20404	Sh3gl2
11	63125750	63137450	11700	7495.19	1629	0	18858	Pmp22
9	23002450	23013200	10750	7493.51	1630	0	319845	Bbs9
9	108077750	108086900	9150	7486.34	1631	0	84585	Rnf123
4	13741500	13753700	12200	7486.34	1632	0	12395	Runx1t1
3	92077250	92086400	9150	7486.34	1633	0	16939	Lor
17	23640700	23645650	4950	7486.34	1634	0	240047	Mmp25
1	180890250	180898600	8350	7485.88	1635	0	320202	Lefty2
5	139654250	139661700	7450	7479.98	1636	0	231830	Micall2
3	30215750	30228750	13000	7470.98	1637	0	14013	Mecom
1	86015400	86024450	9050	7468.17	1638	0	70060	Spata3
12	16644850	16659300	14450	7468.17	1639	0	18217	Ntsr2
12	109524800	109537650	12850	7467.35	1640	0	17263	Meg3
7	144933650	144945450	11800	7463.08	1641	0	12443	Ccnd1
6	29430200	29439950	9750	7459.08	1642	0	68794	Flnc
8	85005700	85018500	12800	7450.68	1643	0	56495	Get3
9	121772200	121782100	9900	7445.72	1644	0	72330	Klhl40
10	24219050	24227550	8500	7431.82	1645	0	59012	Moxd1
4	42910000	42927150	17150	7427.96	1646	0	230085	Phf24
7	142364650	142377850	13200	7423.01	1647	0	320802	Ifitm10
6	63252050	63260850	8800	7413.65	1648	0	14804	Grid2
5	136491500	136506650	15150	7412.61	1649	0	13047	Cux1
17	48928650	48935200	6550	7411.47	1650	0	70530	Lrfn2
6	90459150	90474050	14900	7408.79	1651	0	66277	Klf15
17	34133100	34147400	14300	7406.43	1652	0	15000	H2-DMb2
4	151137600	151154800	17200	7398.75	1653	0	100072	Camta1
9	53970650	53977450	6800	7395.48	1654	0	270162	Elmod1
3	98423650	98430300	6650	7395.48	1655	0	242109	Zfp697
18	42895250	42902750	7500	7395.48	1656	0	72930	Ppp2r2b
11	84692350	84714900	22550	7395.48	1657	0	78471	1700109G15Rik
1	186827850	186839400	11550	7387.49	1658	0	67223	Rrp15
18	63383250	63389100	5850	7377.31	1659	0	667742	Piezo2
16	38896350	38907800	11450	7377.31	1660	0	207683	Igsf11
10	29532500	29540550	8050	7376.86	1661	0	72780	Rspo3
11	61681950	61688250	6300	7368.23	1662	0	69640	Fam83g
4	107844900	107852550	7650	7359.55	1663	0	16975	Lrp8
6	114127050	114135500	8450	7357.64	1664	0	243616	Slc6a11
5	116587600	116597400	9800	7349.97	1665	0	68955	Srrm4
13	76380850	76388400	7550	7348.51	1666	0	78771	Mctp1
17	66446100	66453650	7550	7334.43	1667	0	68617	Mtcl1
11	35117250	35126150	8900	7331.52	1668	0	20564	Slit3
4	132971600	132979350	7750	7322.8	1669	0	14191	Fgr
12	11146300	11153450	7150	7304.63	1670	0	238076	Kcns3
13	108211600	108221100	9500	7293.91	1671	0	74559	Elovl7
4	154731100	154755200	24100	7286.46	1672	0	73353	Actrt2
2	5133250	5142500	9250	7286.46	1673	0	74186	Ccdc3
11	95637050	95653550	16500	7286.46	1674	0	18673	Phb1
8	120164300	120181200	16900	7285.19	1675	0	436062	Cibar2
13	57902850	57910400	7550	7284.87	1676	0	20745	Spock1
2	132372400	132389250	16850	7268.29	1677	0	246313	Prokr2
19	45062900	45069950	7050	7268.29	1678	0	102465114	Mir3084-2
10	51675000	51679400	4400	7268.29	1679	0	320995	Rfx6
11	81962850	81975300	12450	7268.29	1680	0	11418	Asic2
11	28580000	28587150	7150	7268.02	1681	0	216613	Ccdc85a
5	114563750	114578400	14650	7264.7	1682	0	433940	Fam222a
7	46175900	46184300	8400	7250.12	1683	0	20927	Abcc8
15	48784550	48795250	10700	7250.12	1684	0	239420	Csmd3
11	105964100	105973100	9000	7250.12	1685	0	11421	Ace
11	61371350	61381900	10550	7239.58	1686	0	67473	Slc47a1
4	57132700	57143250	10550	7237.81	1687	0	54357	Epb41l4b
5	136615450	136628700	13250	7231.95	1688	0	13047	Cux1
1	121524400	121534750	10350	7231.95	1689	0	15564	Htr5b
1	72532900	72537750	4850	7231.95	1690	0	381270	Marchf4
5	113284750	113293250	8500	7220.73	1691	0	52850	Sgsm1
8	13194900	13206850	11950	7219.5	1692	0	66790	Grtp1
6	42320400	42325900	5500	7213.78	1693	0	76156	Fam131b
18	37140600	37149050	8450	7213.78	1694	0	353237	Pcdhac2
8	35758500	35771100	12600	7211.14	1695	0	100502846	Gm19410
19	3410600	3417950	7350	7195.6	1696	0	14419	Gal
15	76194900	76210200	15300	7195.6	1697	0	18810	Plec
8	71595600	71605850	10250	7188.61	1698	0	66171	Pgls
6	144778850	144788250	9400	7182.98	1699	0	20678	Sox5
11	115080900	115093800	12900	7171.8	1700	0	58222	Rab37
16	90827700	90835750	8050	7170.17	1701	0	70967	Eva1c
17	87633900	87639900	6000	7166.67	1702	0	17075	Epcam
2	29001300	29024400	23100	7159.26	1703	0	329375	Cfap77
7	28627150	28634600	7450	7141.09	1704	0	101744	Acp7
6	100039550	100060300	20750	7138.82	1705	0	56353	Rybp
2	181310200	181317900	7700	7128.96	1706	0	20262	Stmn3
6	136166450	136176700	10250	7122.92	1707	0	14812	Grin2b
6	85122300	85128900	6600	7116.2	1708	0	20751	Spr
19	4982500	4996200	13700	7104.75	1709	0	225872	Npas4
7	113204250	113212400	8150	7104.71	1710	0	11865	Bmal1
10	11076200	11084350	8150	7092.62	1711	0	14816	Grm1
12	76528250	76538950	10700	7086.58	1712	0	263406	Plekhg3
4	131826650	131839250	12600	7084.81	1713	0	19273	Ptpru
15	101409600	101419050	9450	7075.13	1714	0	110310	Krt7
18	35953350	35969750	16400	7068.41	1715	0	74002	Psd2
10	61624300	61630800	6500	7053.92	1716	0	237362	Npffr1
7	44631450	44646850	15400	7050.24	1717	0	71960	Myh14
19	24026400	24036000	9600	7050.24	1718	0	381217	Entrep1
13	25051100	25061350	10250	7050.24	1719	0	195208	Dcdc2a
17	8385900	8392950	7050	7047.06	1720	0	21331	T2
7	109005100	109016250	11150	7032.07	1721	0	22141	Tub
4	151103550	151112850	9300	7032.07	1722	0	100072	Camta1
4	135393850	135403750	9900	7032.07	1723	0	230822	Ncmap
19	50673100	50683100	10000	7032.07	1724	0	58178	Sorcs1
10	64085400	64090950	5550	7032.07	1725	0	216033	Ctnna3
3	94394700	94409300	14600	7030.75	1726	0	320747	Lingo4
2	105219300	105238800	19500	7013.9	1727	0	74088	Them7
1	133323850	133334300	10450	7013.9	1728	0	68338	Golt1a
7	74006500	74019350	12850	7007.58	1729	0	20450	St8sia2
4	140902250	140916750	14500	7005.36	1730	0	18600	Padi2
19	47248500	47258650	10150	7005.08	1731	0	18011	Neurl1a
11	95509100	95519500	10400	7002.22	1732	0	104079	Nxph3
8	120112000	120121900	9900	6995.73	1733	0	234797	6430548M08Rik
3	97886050	97894300	8250	6995.73	1734	0	83679	Pde4dip
18	36063000	36072300	9300	6995.64	1735	0	100042150	Nrg2
2	179439550	179445950	6400	6995.09	1736	0	12561	Cdh4
15	78407200	78415800	8600	6994.18	1737	0	246221	Mpst
8	87959650	87967650	8000	6977.56	1738	0	94187	Zfp423
1	104765600	104773850	8250	6977.56	1739	0	23836	Cdh20
8	107940300	107956700	16400	6975.47	1740	0	11906	Zfhx3
9	95399750	95415900	16150	6961.02	1741	0	54371	Chst2
17	36985950	36992050	6100	6959.39	1742	0	240095	H2-M5
1	39191000	39200000	9000	6958.79	1743	0	18143	Npas2
10	94511650	94522450	10800	6957.89	1744	0	319880	Tmcc3
15	80089000	80095350	6350	6941.21	1745	0	27367	Rpl3
15	79247950	79256250	8300	6941.21	1746	0	57274	Slc16a8
19	30171050	30178750	7700	6932.58	1747	0	104174	Gldc
10	81189900	81198000	8100	6926.36	1748	0	69678	Atcayos
6	137248250	137256950	8700	6923.04	1749	0	19277	Ptpro
2	129904550	129915900	11350	6923.04	1750	0	67333	Stk35
2	125717550	125730250	12700	6923.04	1751	0	271849	Shc4
8	66685150	66691400	6250	6922.54	1752	0	18168	Npy5r
11	80291700	80305500	13800	6919.91	1753	0	246104	Rhbdl3
16	3231550	3241700	10150	6915.82	1754	0	258859	Or1f19
8	80050050	80059450	9400	6910.78	1755	0	15245	Hhip
11	74516350	74526100	9750	6905.69	1756	0	380711	Rap1gap2
17	34960700	34970700	10000	6902.56	1757	0	193740	Hspa1a
1	105775150	105784050	8900	6890.97	1758	0	21934	Tnfrsf11a
19	38477050	38489150	12100	6888.38	1759	0	74055	Plce1
7	132141850	132157450	15600	6886.7	1760	0	55987	Cpxm2
1	154881750	154889900	8150	6886.7	1761	0	12290	Cacna1e
19	11814900	11821950	7050	6886.7	1762	0	20908	Stx3
16	18122350	18129900	7550	6886.7	1763	0	65079	Rtn4r
15	6869600	6878250	8650	6886.7	1764	0	18414	Osmr
4	108028600	108035550	6950	6872.89	1765	0	242608	Podn
8	120728700	120741300	12600	6868.53	1766	0	15900	Irf8
13	72360750	72373400	12650	6868.53	1767	0	328287	Gm20554
10	75555300	75565650	10350	6866.9	1768	0	192734	Lrrc75b
10	90963550	90970800	7250	6853.68	1769	0	77531	Anks1b
5	110339650	110347050	7400	6850.36	1770	0	381667	Lrcol1
14	33306600	33325850	19250	6850.36	1771	0	239027	Arhgap22
15	39854050	39860450	6400	6850.36	1772	0	64705	Dpys
10	85923850	85931700	7850	6850.36	1773	0	67341	Ascl4
11	101881350	101897650	16300	6845.27	1774	0	17285	Meox1
2	143543700	143551400	7700	6832.19	1775	0	378776	Pcsk2os1
15	86027950	86036850	8900	6832.19	1776	0	12614	Celsr1
8	11713750	11727950	14200	6830.15	1777	0	54126	Arhgef7
15	83247700	83254100	6400	6814.02	1778	0	239559	A4galt
15	34835200	34842100	6900	6814.02	1779	0	16539	Kcns2
11	33141450	33148950	7500	6799.3	1780	0	14172	Fgf18
4	154324100	154349050	24950	6798.67	1781	0	70673	Prdm16
9	49337100	49345700	8600	6795.85	1782	0	13489	Drd2
19	14879550	14893250	13700	6780.99	1783	0	21888	Tle4
5	135129250	135138150	8900	6767.87	1784	0	58805	Mlxipl
5	113454200	113468300	14100	6759.51	1785	0	320916	Wscd2
2	168041850	168053400	11550	6759.51	1786	0	58220	Pard6b
3	8507650	8513900	6250	6759.51	1787	0	20257	Stmn2
18	59172200	59180650	8450	6756.51	1788	0	78923	Chsy3
9	117869200	117876950	7750	6741.34	1789	0	27215	Azi2
14	60371500	60381400	9900	6740.11	1790	0	72125	Amer2
5	33100250	33109200	8950	6705	1791	0	20537	Slc5a1
19	42375950	42387300	11350	6705	1792	0	72832	Crtac1
11	61338800	61350000	11200	6705	1793	0	67473	Slc47a1
5	122948900	122955700	6800	6670.29	1794	0	30841	Kdm2b
2	98662200	98663000	800	6669.34	1795	0	241568	Lrrc4c
9	43838550	43850750	12200	6668.65	1796	0	58235	Nectin1
2	25232500	25246550	14050	6668.65	1797	0	78797	Ndor1
15	83684650	83706550	21900	6668.65	1798	0	64706	Scube1
8	31084050	31092600	8550	6667.84	1799	0	66959	Dusp26
13	55377100	55383900	6800	6653.16	1800	0	51791	Rgs14
4	127966800	127978100	11300	6650.48	1801	0	635169	CK137956
18	24648050	24657150	9100	6638.63	1802	0	68591	Mocos
4	108212250	108222350	10100	6632.31	1803	0	230590	Zyg11a
14	34658500	34666100	7600	6632.31	1804	0	218914	Wapl
2	179759050	179771850	12800	6631.59	1805	0	12561	Cdh4
18	38591950	38606150	14200	6616.23	1806	0	24066	Spry4
2	5376750	5379400	2650	6616.1	1807	0	227541	Camk1d
4	116014350	116020750	6400	6614.14	1808	0	14073	Faah
2	54434200	54441050	6850	6614.14	1809	0	271786	Galnt13
13	109112850	109120350	7500	6595.97	1810	0	238871	Pde4d
5	120245450	120257500	12050	6595.15	1811	0	74111	Rbm19
9	61021350	61040100	18750	6594.61	1812	0	330956	Gm5122
9	65625550	65634300	8750	6577.8	1813	0	71973	Rbpms2
2	55433800	55439550	5750	6577.8	1814	0	16519	Kcnj3
19	58929200	58937000	7800	6573.71	1815	0	73442	Hspa12a
4	132139650	132147900	8250	6568.35	1816	0	18386	Oprd1
2	167182700	167193900	11200	6559.63	1817	0	19223	Ptgis
18	81912500	81921150	8650	6559.63	1818	0	100628596	Mir5127
17	25713100	25718850	5750	6559.63	1819	0	64337	Gng13
12	44327250	44334050	6800	6559.63	1820	0	319504	Nrcam
5	119619000	119634400	15400	6557.36	1821	0	330183	Gm16063
6	99878050	99901000	22950	6541.46	1822	0	50501	Prok2
2	92365950	92377150	11200	6541.46	1823	0	228366	Large2
12	105559050	105566000	6950	6541.46	1824	0	12062	Bdkrb2
5	39640600	39648650	8050	6536.42	1825	0	15476	Hs3st1
2	118365250	118377100	11850	6533.37	1826	0	381413	Gpr176
6	91800000	91810600	10600	6523.29	1827	0	243547	Grip2
2	4711950	4727750	15800	6523.29	1828	0	209645	Bend7
18	24706400	24714300	7900	6523.29	1829	0	225288	Fhod3
12	12936400	12945000	8600	6523.29	1830	0	18109	Mycn
4	136417300	136428550	11250	6518.88	1831	0	15552	Htr1d
5	73399500	73411050	11550	6505.98	1832	0	231293	Cwh43
14	60170400	60181500	11100	6504.94	1833	0	50769	Atp8a2
16	31424200	31433900	9700	6502.35	1834	0	71911	Bdh1
15	78800000	78808600	8600	6500.44	1835	0	105844	Card10
8	124430100	124434250	4150	6489.45	1836	0	209966	Pgbd5
13	34127900	34136300	8400	6486.95	1837	0	73710	Tubb2b
16	4638900	4659700	20800	6486.77	1838	0	78885	Coro7
8	29215150	29220050	4900	6476.27	1839	0	210801	Unc5d
X	53972450	53978450	6000	6468.78	1840	0	22441	Xlr
9	31461400	31467700	6300	6468.78	1841	0	235135	Tmem45b
14	63730200	63746400	16200	6468.78	1842	0	219149	Xkr6
16	88286350	88294700	8350	6468.32	1843	0	14805	Grik1
9	122587000	122600100	13100	6466.14	1844	0	319626	9530059O14Rik
11	116218050	116226150	8100	6458.51	1845	0	69681	Cdk3
10	128582600	128591400	8800	6455.1	1846	0	13867	Erbb3
9	29409150	29417950	8800	6450.61	1847	0	235106	Ntm
6	29489650	29499350	9700	6450.61	1848	0	333088	Kcp
19	25233600	25242000	8400	6450.61	1849	0	107351	Kank1
11	52277950	52288850	10900	6450.61	1850	0	21414	Tcf7
7	19061850	19067900	6050	6449.11	1851	0	83434	Rsph6a
17	34626350	34634350	8000	6449.06	1852	0	54397	Ppt2
4	101493500	101500550	7050	6432.43	1853	0	72685	Dnajc6
4	33921250	33932350	11100	6432.43	1854	0	12801	Cnr1
6	89232050	89249100	17050	6414.26	1855	0	330379	Gm839
1	22529100	22537550	8450	6414.26	1856	0	116837	Rims1
18	72345700	72352850	7150	6414.26	1857	0	13176	Dcc
15	82060700	82074600	13900	6414.26	1858	0	74369	Mei1
2	151840050	151847950	7900	6413.36	1859	0	228770	Rspo4
11	59961200	59967000	5800	6411.81	1860	0	19416	Rasd1
15	78666800	78677400	10600	6402.18	1861	0	207393	Elfn2
9	29958700	29965650	6950	6396.09	1862	0	235106	Ntm
15	83523200	83534450	11250	6396.09	1863	0	12124	Bik
12	72827050	72838050	11000	6396.09	1864	0	19042	Ppm1a
11	47983850	47994500	10650	6396.09	1865	0	24052	Sgcd
9	81627900	81637250	9350	6377.92	1866	0	319405	D430036J16Rik
7	107365200	107376050	10850	6377.92	1867	0	60510	Syt9
17	24655150	24663350	8200	6377.92	1868	0	381073	Npw
15	89495750	89505250	9500	6377.92	1869	0	58234	Shank3
13	54052450	54059600	7150	6377.92	1870	0	13488	Drd1
13	96921250	96933550	12300	6364.98	1871	0	218476	Gcnt4
6	125318200	125325850	7650	6359.75	1872	0	20276	Scnn1a
19	16432350	16440350	8000	6359.75	1873	0	14675	Gna14
1	162473250	162480650	7400	6345.94	1874	0	103967	Dnm3
7	29015150	29023550	8400	6341.58	1875	0	20190	Ryr1
9	32403350	32414350	11000	6323.41	1876	0	56379	Kcnj1
6	99721550	99732200	10650	6323.41	1877	0	50501	Prok2
9	40959550	40967000	7450	6314.32	1878	0	70989	Jhy
2	54080550	54087350	6800	6305.24	1879	0	67874	Rprm
X	105762300	105769150	6850	6298.61	1880	0	80903	Fgf16
15	84101350	84108850	7500	6283.39	1881	0	29859	Sult4a1
3	31305800	31314550	8750	6268.9	1882	0	241919	Slc7a14
11	4260200	4272900	12700	6268.9	1883	0	16878	Lif
15	30643050	30649350	6300	6268.67	1884	0	18163	Ctnnd2
11	95071150	95082000	10850	6268.4	1885	0	16400	Itga3
7	4467600	4477150	9550	6266.26	1886	0	67425	Eps8l1
17	67694800	67701850	7050	6265.54	1887	0	16772	Lama1
8	106333250	106339150	5900	6259.13	1888	0	58994	Smpd3
18	35914100	35923600	9500	6250.73	1889	0	74002	Psd2
16	17275150	17281900	6750	6250.73	1890	0	224020	Pi4ka
11	103167350	103176800	9450	6250.73	1891	0	57778	Fmnl1
4	41629300	41643250	13950	6247.5	1892	0	69638	Enho
5	84412200	84419400	7200	6232.56	1893	0	13839	Epha5
3	153967950	153977500	9550	6232.56	1894	0	242259	Slc44a5
3	30645000	30653050	8050	6232.56	1895	0	71827	Lrrc34
13	31074400	31085250	10850	6225.02	1896	0	66482	Exoc2
8	91986000	91999900	13900	6221.38	1897	0	16373	Irx3
9	22095500	22104650	9150	6214.39	1898	0	12797	Cnn1
5	119743300	119754300	11000	6214.39	1899	0	433944	Tbx3os2
3	89140100	89154650	14550	6214.39	1900	0	18770	Pklr
18	81643600	81650450	6850	6214.39	1901	0	100628596	Mir5127
19	45539150	45546750	7600	6214.39	1902	0	102465114	Mir3084-2
16	23888650	23900500	11850	6214.39	1903	0	20604	Sst
4	126285700	126292100	6400	6203.21	1904	0	329941	Col8a2
X	57499450	57506600	7150	6196.22	1905	0	245424	Gpr101
2	178138500	178149400	10900	6196.22	1906	0	74189	Phactr3
15	100870950	100879500	8550	6196.22	1907	0	20273	Scn8a
12	84693700	84705200	11500	6196.22	1908	0	627191	Syndig1l
3	141460300	141470800	10500	6195.31	1909	0	22253	Unc5c
10	20144250	20151800	7550	6194.17	1910	0	17761	Map7
11	96144200	96150500	6300	6180.59	1911	0	237930	Ttll6
7	100175150	100184800	9650	6178.04	1912	0	57442	Kcne3
4	138718350	138733650	15300	6178.04	1913	0	212190	Ubxn10
15	54568800	54576000	7200	6178.04	1914	0	105853	Mal2
12	83482150	83490200	8050	6178.04	1915	0	70127	Dpf3
10	81568900	81583150	14250	6178.04	1916	0	21886	Tle2
6	54036550	54044000	7450	6175.68	1917	0	69993	Chn2
8	22052950	22061450	8500	6170.14	1918	0	207958	Alg11
5	53046850	53052900	6050	6159.87	1919	0	20531	Slc34a2
11	88187350	88200500	13150	6155.92	1920	0	103841	Cuedc1
7	19573200	19583150	9950	6144.56	1921	0	69731	Gemin7
8	71626900	71639100	12200	6141.7	1922	0	382018	Unc13a
9	42892600	42903050	10450	6141.7	1923	0	110637	Grik4
4	66397900	66407050	9150	6141.7	1924	0	56079	Astn2
4	9014200	9026550	12350	6141.7	1925	0	320790	Chd7
2	27132400	27146250	13850	6141.7	1926	0	329371	Dbhos
19	28676450	28687200	10750	6141.7	1927	0	320176	D930032P07Rik
14	34216300	34223850	7550	6137.02	1928	0	319508	Syt15
9	23027250	23044900	17650	6126.12	1929	0	319845	Bbs9
12	81024200	81032000	7800	6125.17	1930	0	64075	Smoc1
6	82399150	82407250	8100	6123.53	1931	0	21336	Tacr1
6	65666100	65676900	10800	6123.53	1932	0	68169	Ndnf
10	60103850	60111900	8050	6123.53	1933	0	94214	Spock2
12	87097350	87105600	8250	6117.63	1934	0	64242	Ngb
1	171062950	171065200	2250	6105.36	1935	0	14131	Fcgr3
12	118195100	118201550	6450	6105.36	1936	0	13411	Dnah11
11	94877500	94886000	8500	6105.36	1937	0	12842	Col1a1
11	43772400	43779500	7100	6105.36	1938	0	11548	Adra1b
7	45697500	45706650	9150	6096.82	1939	0	13170	Dbp
2	178115150	178125100	9950	6087.19	1940	0	74189	Phactr3
4	156030300	156038350	8050	6086.33	1941	0	330010	Ttll10
4	124473200	124487500	14300	6085.96	1942	0	78460	1700057H15Rik
1	91534300	91541450	7150	6084.6	1943	0	65247	Asb1
2	168078350	168086250	7900	6084.37	1944	0	58220	Pard6b
18	24459050	24468050	9000	6081.65	1945	0	68046	2700062C07Rik
11	94929550	94945000	15450	6080.56	1946	0	12842	Col1a1
6	122739650	122748650	9000	6078.24	1947	0	20527	Slc2a3
8	121500250	121518000	17750	6070.79	1948	0	108148	Galnt2
10	88884450	88889450	5000	6069.02	1949	0	216225	Slc5a8
11	109010850	109012900	2050	6069.02	1950	0	12006	Axin2
5	30454100	30469050	14950	6067.02	1951	0	83762	Otof
6	145071600	145080650	9050	6065.93	1952	0	12035	Bcat1
5	137639200	137649400	10200	6065.39	1953	0	751865	Sap25
12	40129350	40135650	6300	6062.43	1954	0	20259	Scin
8	13488650	13496850	8200	6050.85	1955	0	14456	Gas6
17	26407950	26425800	17850	6050.85	1956	0	240055	Neurl1b
7	45796900	45803500	6600	6046.17	1957	0	381983	Lmtk3
5	100841800	100850150	8350	6032.68	1958	0	231510	Gpat3
1	120004750	120012550	7800	6032.68	1959	0	319229	Sctr
10	93633750	93645250	11500	6032.68	1960	0	57764	Ntn4
8	109958700	109964850	6150	6030.04	1961	0	73608	Marveld3
8	125893700	125899600	5900	6014.51	1962	0	270109	Pcnx2
6	99689200	99699600	10400	6014.51	1963	0	14761	Gpr27
2	164852250	164860400	8150	6014.51	1964	0	18830	Pltp
17	47917600	47927950	10350	6014.51	1965	0	74123	Foxp4
13	42706000	42712700	6700	6014.51	1966	0	218194	Phactr1
13	13781050	13790950	9900	6014.51	1967	0	14706	Gng4
11	97089300	97102600	13300	6014.51	1968	0	57765	Tbx21
2	165590750	165599300	8550	5996.34	1969	0	14049	Eya2
13	55959950	55969150	9200	5996.34	1970	0	26914	Macroh2a1
9	54973850	54986200	12350	5978.17	1971	0	110835	Chrna5
19	6827750	6833750	6000	5978.17	1972	0	56613	Rps6ka4
12	81327500	81338800	11300	5978.17	1973	0	110893	Slc8a3
10	70597700	70603900	6200	5978.17	1974	0	70911	Phyhipl
16	96276100	96286250	10150	5974.26	1975	0	93961	B3galt5
7	140150650	140159850	9200	5968.99	1976	0	212518	Sprn
3	80797300	80803550	6250	5960	1977	0	14800	Gria2
18	36344300	36356050	11750	5960	1978	0	66060	Cystm1
16	94323300	94333900	10600	5960	1979	0	170765	Ripply3
11	59238950	59258350	19400	5960	1980	0	22416	Wnt3a
2	28745750	28758650	12900	5953.73	1981	0	68870	Ak8
7	24495300	24506350	11050	5953.09	1982	0	260299	Cadm4
X	140274600	140283850	9250	5941.83	1983	0	100499512	Mir3475
6	28393750	28402600	8850	5941.83	1984	0	627049	Zfp800
7	109860500	109869500	9000	5941.83	1985	0	56788	Scube2
1	135578200	135587600	9400	5941.83	1986	0	215714	Gm4793
18	77551650	77569600	17950	5941.83	1987	0	225743	Ark2c
18	67340100	67346850	6750	5941.83	1988	0	338360	B430212C06Rik
16	91137050	91145150	8100	5939.69	1989	0	74387	4932438H23Rik
4	3672700	3681600	8900	5938.83	1990	0	17096	Lyn
8	126292450	126302300	9850	5928.92	1991	0	210027	Slc35f3
9	56619200	56626600	7400	5926.88	1992	0	235402	Lingo1
4	125690350	125703850	13500	5924.93	1993	0	14807	Grik3
5	138751900	138759200	7300	5923.65	1994	0	80752	Fam20c
5	37087500	37096850	9350	5923.65	1995	0	76071	Jakmip1
17	34036700	34046350	9650	5923.65	1996	0	20182	Rxrb
15	30169550	30176400	6850	5923.65	1997	0	18163	Ctnnd2
1	34453900	34464250	10350	5922.84	1998	0	19253	Ptpn18
[truncated: 610 more rows]
