# Supplementary material for: Eed controls craniofacial osteoblast differentiation and mesenchymal proliferation from the neural crest
Source: eLife. 2025 Dec 2;13:RP100159. doi: 10.7554/eLife.100159 (PMC12671911; doi:10.7554/eLife.100159)
Supplement: Supplementary file 10. [file elife-100159-supp10.xlsx]

## Sheet: Supplementary_File_10
Supplementary File 10. Methylation rank and nearest gene coordinates from CUT&Tag H3K27me3 sequencing of E16.5 Sox10-Cre; EedFl/Fl craniofacial tissues.
Chromosome	START	STOP	CONSTITUENT_SIZE	E16.5_KO_merged.bam	Methylation rank	Is past inflection point	nearestEntrez	nearestGene
15	102871350	103190100	318750	629338	1	1	751557	Mir615
11	96119150	96384500	265350	622103	2	1	75395	Hoxb5os
6	52146050	52327450	181400	620026	3	1	791364	Hottip
17	39840550	39852900	12350	535550	4	1	100861531	Rn45s
2	74641650	74795050	153400	394984	5	1	73429	Hoxd3os1
19	44630350	44777550	147200	262780	6	1	18504	Pax2
8	121054200	121237150	182950	237648	7	1	68790	Fendrr
7	79488600	79596950	108350	208516	8	1	723968	Mir9-3
5	28116100	28223700	107600	206909	9	1	269637	Cnpy1
2	33534900	33651950	117050	197717	10	1	16917	Lmx1b
5	147258200	147332150	73950	187575	11	1	70147	Plut
5	119788200	119880500	92300	184651	12	1	21388	Tbx5
4	115883500	115988850	105350	178098	13	1	76237	Tmem275
14	63227000	63280450	53450	172380	14	1	14463	Gata4
19	43569850	43627750	57900	167207	15	1	18089	Nkx2-3
8	12372600	12436500	63900	166647	16	1	434280	Sox1ot
11	3126900	3200150	73250	161880	17	1	78887	Sfi1
9	91346000	91424800	78800	158370	18	1	22774	Zic4
1	78125550	78233050	107500	155797	19	1	18505	Pax3
1	89910650	89976400	65750	150946	20	1	208372	Asb18
8	57303050	57365650	62600	144452	21	1	75996	Hdnr
6	83670200	83739500	69300	144423	22	1	574519	Vax2os
5	35356900	35438350	81450	143061	23	1	74429	4930478P22Rik
5	139521600	139615000	93400	140309	24	1	74973	4930500L23Rik
3	88183850	88259950	76100	138733	25	1	58176	Rhbg
2	105646250	105695800	49550	137135	26	1	402728	Pax6os1
19	45123950	45181300	57350	136497	27	1	21908	Tlx1
1	120587600	120634850	47250	135014	28	1	13798	En1
4	139800400	139860000	59600	131961	29	1	18509	Pax7
2	148010150	148063000	52850	128344	30	1	15376	Foxa2
4	114877550	114944750	67200	124868	31	1	30923	Foxe3
5	106426200	106482400	56200	123978	32	1	104382	Barhl2
15	98766750	98812200	45450	123336	33	1	22410	Wnt10b
11	98289100	98356350	67250	122378	34	1	69338	1700003D09Rik
13	40697450	40753700	56250	121863	35	1	21418	Tfap2a
3	129188800	129235000	46200	121765	36	1	18741	Pitx2
16	94072350	94109750	37400	120961	37	1	20465	Sim2
19	45213800	45263750	49950	120822	38	1	16814	Lbx1
6	6838950	6891600	52650	117400	39	1	320038	Dlx6os1
8	71641050	71716100	75050	116647	40	1	74015	Fcho1
1	74838250	74936950	98700	116038	41	1	723900	Mir375
2	9867200	9911150	43950	115577	42	1	77682	Gata3un
9	74837550	74875850	38300	115429	43	1	15379	Onecut1
4	135132150	135184350	52200	113773	44	1	12399	Runx3
13	31604600	31664150	59550	113256	45	1	71307	1700018A04Rik
17	26826550	26868300	41750	113020	46	1	18091	Nkx2-5
4	89264050	89316800	52750	112659	47	1	12579	Cdkn2b
7	131527900	131561300	33400	111497	48	1	15373	Hmx3
17	85604350	85635100	30750	111485	49	1	20473	Six3
2	71514400	71559900	45500	111478	50	1	66559	Metap1d
5	29461750	29493750	32000	110287	51	1	15285	Mnx1
2	31624650	31668900	44250	109733	52	1	381359	Prdm12
16	91202400	91249000	46600	106189	53	1	50913	Olig2
1	42675950	42723950	48000	105889	54	1	66620	Pantr2
2	36078300	36116100	37800	105382	55	1	75495	Morn5
10	80464400	80504550	40150	105262	56	1	246086	Onecut3
1	184703550	184743100	39550	104282	57	1	74971	4930488B22Rik
9	63127850	63162350	34500	103844	58	1	207667	Skor1
1	155707050	155755400	48350	103745	59	1	16872	Lhx4
5	120379350	120441400	62050	103571	60	1	16873	Lhx5
12	56507600	56549200	41600	103406	61	1	21869	Nkx2-1
14	122437950	122492100	54150	102210	62	1	69248	2610035F20Rik
5	41737900	41772900	35000	101698	63	1	12020	Nkx3-2
10	42559700	42598450	38750	101370	64	1	21907	Nr2e1
2	38330600	38377700	47100	100978	65	1	16870	Lhx2
5	119647450	119694700	47250	100564	66	1	433944	Tbx3os2
7	24926600	24960450	33850	100080	67	1	232974	Erfl
11	103723900	103817850	93950	99340.2	68	1	22415	Wnt3
11	119031850	119069200	37350	98694	69	1	30951	Cbx8
11	84512250	84537150	24900	97922	70	1	78365	Lhx1os
3	99231050	99270150	39100	97703.6	71	1	70560	Wars2
6	83052000	83105050	53050	97200.6	72	1	93838	Dqx1
19	59142050	59200700	58650	95356.2	73	1	22326	Vax1
6	88181650	88211000	29350	94963.1	74	1	14461	Gata2
4	109967050	109990650	23600	94598.7	75	1	242620	Dmrta2
2	105109950	105145700	35750	94484.4	76	1	329480	Wt1os
13	55812650	55853250	40600	94243.2	77	1	18740	Pitx1
16	18571950	18631950	60000	93408.3	78	1	21380	Tbx1
9	98948100	98988600	40500	93095.1	79	1	768252	Foxl2os
3	34629550	34678600	49050	92935.3	80	1	320478	Sox2ot
2	147172550	147201850	29300	92572.3	81	1	78068	6430503K07Rik
12	57527900	57558100	30200	91639.9	82	1	15375	Foxa1
13	73244600	73286750	42150	91163.5	83	1	50916	Irx4
19	37681500	37708950	27450	90798.9	84	1	546726	Cyp26c1
1	74767500	74820000	52500	90775	85	1	22420	Wnt6
5	37811100	37839950	28850	90495.4	86	1	17701	Msx1
13	48647650	48683850	36200	90413.2	87	1	12022	Barx1
10	50878150	50916550	38400	89725.7	88	1	20464	Sim1
12	56671550	56705750	34200	88728.8	89	1	18511	Pax9
5	75060350	75088950	28600	88220.7	90	1	14843	Gsx2
11	33188050	33214050	26000	87635.9	91	1	66011	Ranbp17
11	85874200	85913500	39300	86234.1	92	1	21387	Tbx4
18	64322800	64359250	36450	85939	93	1	73588	St8sia3os
3	87977350	88044200	66850	85809.2	94	1	73940	Hapln2
13	94859850	94903950	44100	85511.8	95	1	18420	Otp
11	57822250	57852950	30700	85271.8	96	1	15110	Hand1
4	136882900	136983950	101050	85025.8	97	1	230848	Zbtb40
1	75412950	75490400	77450	84025.3	98	1	98733	Obsl1
2	19419250	19462650	43400	83310.2	99	1	19213	Ptf1a
2	93601800	93665350	63550	83265.1	100	1	14043	Ext2
4	21664800	21722100	57300	83185.4	101	1	230025	Prdm13
2	28903100	28933600	30500	82603.2	102	1	54422	Barhl1
2	147348900	147383000	34100	82177	103	1	99041	AI646519
6	85177700	85211550	33850	82061.8	104	1	13796	Emx1
4	22473050	22503100	30050	81915.6	105	1	18992	Pou3f2
5	101636150	101671250	35100	81661.8	106	1	18096	Nkx6-1
9	69743100	69780600	37500	81560.9	107	1	64290	Foxb1
8	69868950	69899000	30050	80341.7	108	1	80720	Pbx4
14	48646700	48680100	33400	80167	109	1	606497	Otx2os1
14	12332250	12359400	27150	80083.9	110	1	54713	Fezf2
10	19344850	19370000	25150	79931.5	111	1	94222	Olig3
9	99855150	99884450	29300	79737.8	112	1	20669	Sox14
19	25588600	25626650	38050	79474.6	113	1	50796	Dmrt1
4	125465650	125542250	76600	79363.9	114	1	735288	Mir692-2
5	67197350	67238600	41250	78053.1	115	1	67878	Tmem33
5	33423950	33452800	28850	77588.7	116	1	672284	Nkx1-1
7	140042000	140085850	43850	77289.3	117	1	68566	Caly
19	59445050	59477800	32750	76776.9	118	1	329078	Emx2os
5	98163800	98198050	34250	76769.5	119	1	77630	Prdm8
4	115046700	115076700	30000	76719.2	120	1	21349	Tal1
9	24760000	24784350	24350	76553.6	121	1	57246	Tbx20
13	78167300	78215700	48400	76091.8	122	1	320174	A830082K12Rik
7	44420100	44536650	116550	74757.2	123	1	75538	Garin5a
17	85669550	85697100	27550	74595.7	124	0	20472	Six2
11	59238900	59310450	71550	74594.7	125	0	22416	Wnt3a
13	71948300	71987850	39550	74494.5	126	0	16371	Irx1
13	53446350	53495150	48800	74331.6	127	0	17702	Msx2
10	22803650	22853450	49800	74019.1	128	0	21412	Tcf21
13	72616600	72654200	37600	73829.8	129	0	328287	Gm20554
5	107711050	107737650	26600	73765.3	130	0	14581	Gfi1
19	16857250	16886600	29350	73039	131	0	14240	Foxb2
18	76837800	76871450	33650	72745.2	132	0	664805	Skor2
3	87760900	87822200	61300	72366	133	0	73182	Pear1
2	26181050	26217700	36650	72288.9	134	0	227638	Qsox2
4	99634100	99670000	35900	71819	135	0	15221	Foxd3
4	46325850	46361950	36100	71729.8	136	0	110805	Foxe1
14	69160450	69205150	44700	71485.2	137	0	73554	1700092C10Rik
7	45157550	45201700	44150	70576.6	138	0	72961	Slc17a7
1	56967350	56991400	24050	70545.9	139	0	329160	9130024F11Rik
1	138827900	138855950	28050	70455.4	140	0	69549	2310009B15Rik
1	63236650	63283950	47300	70289.8	141	0	73884	Zdbf2
1	19205050	19249250	44200	69850.9	142	0	21419	Tfap2b
6	23237650	23266400	28750	69403.1	143	0	73191	Fezf1
9	40850500	40898500	48000	69337.1	144	0	70989	Jhy
13	54905750	55018900	113150	69315.9	145	0	212032	Hk3
18	11043700	11069850	26150	69228.2	146	0	68434	Gata6os
3	127620700	127654800	34100	68932.6	147	0	11924	Neurog2
15	75989650	76017750	28100	68905.1	148	0	432964	Iqank1
12	111403250	111465950	62700	68342	149	0	74190	Exoc3l4
14	67222450	67244250	21800	68152.8	150	0	13592	Ebf2
13	98332700	98385350	52650	68093.1	151	0	15229	Foxd1
9	118460800	118494300	33500	68032.7	152	0	13813	Eomes
7	144834300	144869500	35200	67880.4	153	0	14175	Fgf4
11	85819250	85849700	30450	67227	154	0	69909	2610027K06Rik
2	122288350	122322350	34000	66952.4	155	0	99439	Duox1
7	139573250	139602800	29550	66508.5	156	0	212124	Cfap46
18	53452600	53483350	30750	66225.7	157	0	225518	Prdm6
13	83709350	83743050	33700	65748.1	158	0	723967	Mir9-2
13	21975450	22023050	47600	65370.5	159	0	54373	Prss16
1	4487000	4509450	22450	65080.3	160	0	20671	Sox17
17	8423850	8447300	23450	64916.8	161	0	20997	T
11	21982000	22009150	27150	64381.8	162	0	216565	Ehbp1
14	104447600	104479650	32050	64283.8	163	0	72486	Obi1
1	167652800	167708350	55550	64229.4	164	0	110648	Lmx1a
4	9837550	9863600	26050	63657.3	165	0	242316	Gdf6
12	8289450	8327800	38350	63563.7	166	0	58240	Hs1bp3
13	116289250	116321700	32450	63550.2	167	0	16392	Isl1
17	85447250	85496900	49650	63457.9	168	0	73582	Camkmt
3	107576500	107607550	31050	63296	169	0	11694	Alx3
11	118482100	118602250	120150	63020.3	170	0	52897	Rbfox3
12	49368850	49405550	36700	62752.6	171	0	67293	3110039M20Rik
18	80969000	81001350	32350	62543.8	172	0	20689	Sall3
18	42376000	42410600	34600	62138.8	173	0	18998	Pou4f3
11	115305900	115343100	37200	62023.6	174	0	69602	Otop3
11	115215050	115279600	64550	61719.7	175	0	320534	Tmem104
2	38679800	38720100	40300	61427.9	176	0	26423	Nr5a1
8	120868750	120906250	37500	61232.3	177	0	108148	Galnt2
11	97530100	97581200	51100	61153	178	0	56013	Srcin1
17	36128300	36175500	47200	60970.2	179	0	69717	Gm10499
15	99575650	99613200	37550	60950.9	180	0	11831	Aqp6
9	58191950	58208750	16800	60278.7	181	0	665268	1600029O15Rik
12	9562250	9587850	25600	60250.6	182	0	69420	1700022H16Rik
16	17791300	17839300	48000	59987.8	183	0	80733	Car15
12	118831500	118858700	27200	59538.4	184	0	320145	Sp8
10	127506100	127542150	36050	59443.3	185	0	407790	Ndufa4l2
5	67081750	67113500	31750	58981.8	186	0	18935	Phox2b
5	28450700	28484850	34150	58752.1	187	0	654796	9530036O11Rik
14	32438100	32476550	38450	58672.4	188	0	20508	Slc18a3
2	164919050	164975350	56300	58321.7	189	0	57138	Slc12a5
14	118220900	118242400	21500	58212.4	190	0	223227	Sox21
13	36718650	36741550	22900	57573.5	191	0	69955	Fars2
3	154312450	154340900	28450	57520.4	192	0	99686	AI606473
10	84749550	84767100	17550	57508.9	193	0	71137	Rfx4
12	73024250	73064400	40150	56729.3	194	0	20471	Six1
2	70554950	70575450	20500	56687.8	195	0	68986	Gad1os
12	56597100	56632100	35000	56682.6	196	0	18094	Nkx2-9
9	55532200	55552550	20350	56500.4	197	0	244891	Scaper
1	136939700	136963650	23950	56377.1	198	0	26424	Nr5a2
2	165070450	165151400	80950	56016.6	199	0	72211	1700025C18Rik
2	118698900	118725100	26200	55877.2	200	0	383787	Ankrd63
19	6494100	6550200	56100	55837	201	0	20521	Slc22a12
7	49890700	49929050	38350	55755.3	202	0	104245	Slc6a5
15	75716600	75761600	45000	55447.8	203	0	378435	Mafa
19	25659100	25694000	34900	55378.7	204	0	226049	Dmrt2
2	160351000	160379050	28050	55148.1	205	0	16658	Mafb
8	78416550	78448250	31700	54716.4	206	0	18997	Pou4f2
13	112976200	113004400	28200	54201.5	207	0	622408	Mcidas
7	49625950	49651300	25350	54111.6	208	0	13172	Dbx1
4	152113100	152138000	24900	54006.9	209	0	85030	Tnfrsf25
13	31786250	31825800	39550	53889.6	210	0	218138	Gmds
12	117130800	117163650	32850	53303	211	0	19276	Ptprn2
12	110249150	110295350	46200	53254.4	212	0	353504	Dio3os
9	87719050	87758350	39300	53226.2	213	0	76365	Tbx18
2	73260950	73283000	22050	52861.6	214	0	381373	Sp9
18	60988150	61054800	66650	52860.7	215	0	240332	Slc6a7
2	25282900	25329200	46300	52672.3	216	0	99152	Anapc2
7	139891800	139952850	61050	52635.6	217	0	76484	Kndc1
6	30165000	30187850	22850	52304.7	218	0	723886	Mir96
17	34643650	34686800	43150	51941.9	219	0	81877	Tnxb
11	119530400	119575950	45550	51730.8	220	0	18164	Nptx1
7	70273250	70296700	23450	51560	221	0	624549	Gm29683
3	96388150	96418650	30500	51412	222	0	21748	Terc
4	148159450	148182250	22800	50820.7	223	0	230904	Fbxo2
19	24879500	24911100	31600	50770.7	224	0	14237	Foxd4
7	30449550	30477950	28400	50735.5	225	0	54631	Nphs1
18	65923050	65947700	24650	50627.6	226	0	19434	Rax
11	68371600	68409950	38350	50487.2	227	0	18208	Ntn1
19	45723400	45749850	26450	50247.7	228	0	18150	Npm3
14	63932950	63963150	30200	50064.5	229	0	20680	Sox7
2	146825800	146843650	17850	49889	230	0	228730	Kiz
8	105257350	105282700	25350	49847.6	231	0	78688	Nol3
8	70474850	70511500	36650	49814.6	232	0	75620	Kxd1
4	154404600	154509000	104400	49809.3	233	0	70673	Prdm16
2	172539250	172566150	26900	49560.4	234	0	21420	Tfap2c
9	21010450	21044650	34200	49522.6	235	0	78369	Icam4
1	88211100	88312450	101350	49136.8	236	0	94284	Ugt1a6a
5	24511350	24550900	39550	48975.1	237	0	231045	Iqca1l
5	135838400	135877500	39100	48938.4	238	0	58212	Srrm3
X	58011250	58044300	33050	48898.1	239	0	22773	Zic3
4	124977550	125011650	34100	48462	240	0	192199	Rspo1
X	93275200	93305150	29950	48118.7	241	0	18968	Pola1
15	74499900	74542100	42200	48075.2	242	0	107831	Adgrb1
3	96318850	96346000	27150	48070.8	243	0	100504145	Platr30
10	22143700	22170600	26900	47993.4	244	0	667281	H60b
9	122556650	122580450	23800	47618.3	245	0	319626	9530059O14Rik
2	61799900	61815500	15600	47477.6	246	0	59029	Psmd14
5	147181950	147202050	20100	47290.6	247	0	14842	Gsx1
10	81438900	81479650	40750	47261.1	248	0	319586	Celf5
5	35262350	35320000	57650	47119.9	249	0	11553	Adra2c
3	66959500	66987000	27500	46856.8	250	0	66880	Rsrc1
9	107366250	107410900	44650	46844.3	251	0	56808	Cacna2d2
5	31073850	31102250	28400	46594.3	252	0	69719	Cad
13	94698300	94719900	21600	46564.1	253	0	21371	Tbca
1	187596800	187613300	16500	46169.1	254	0	26381	Esrrg
12	72930750	72954550	23800	46146	255	0	75801	4930447C04Rik
5	108358700	108391750	33050	46141.1	256	0	77560	9330198I05Rik
14	64567700	64601650	33950	45963	257	0	387233	Mir124a-1
8	87455000	87482050	27050	45783	258	0	12404	Cbln1
11	83840100	83870800	30700	45728.3	259	0	21410	Hnf1b
2	57094900	57118250	23350	45568.4	260	0	18227	Nr4a2
12	84556900	84582050	25150	45537.8	261	0	12677	Vsx2
4	124631500	124676900	45400	45516.6	262	0	18991	Pou3f1
5	113320400	113357150	36750	45430.4	263	0	102466821	Mir7230
2	181067900	181167450	99550	45222.4	264	0	16536	Kcnq2
4	126720050	126740950	20900	45143.2	265	0	332937	Tfap2e
3	17778650	17799550	20900	44612.1	266	0	723950	Mir124a-2
12	104458250	104491750	33500	44585.2	267	0	14836	Gsc
14	32581450	32612300	30850	44475.2	268	0	107751	Drgx
2	84862750	84896050	33300	44433.6	269	0	72401	Slc43a1
5	139898500	139921900	23400	44386.6	270	0	243312	Elfn1
1	190165100	190183200	18100	44224.5	271	0	19130	Prox1
2	70461550	70489050	27500	44202.9	272	0	64406	Sp5
2	18685600	18706700	21100	44082.7	273	0	381350	Spag6
4	127953800	128005700	51900	43985.4	274	0	635169	CK137956
15	35288150	35309000	20850	43620	275	0	107587	Osr2
3	30498050	30522450	24400	43584.8	276	0	14013	Mecom
1	13117700	13131900	14200	43568.9	277	0	383491	Prdm14
8	92349800	92390200	40400	43330.5	278	0	71296	Crnde
5	36845000	36885100	40100	43259.9	279	0	71054	Ppp2r2cos
7	25127050	25188200	61150	43196.7	280	0	434147	D930028M14Rik
11	12007300	12051600	44300	42936.4	281	0	14783	Grb10
15	78709700	78728000	18300	42743.1	282	0	207393	Elfn2
6	64722600	64742100	19500	42555.1	283	0	11921	Atoh1
2	180876400	180901950	25550	42438.5	284	0	723951	Mir124a-3
10	52017100	52034200	17100	42272.9	285	0	215031	Vgll2
10	87481100	87509050	27950	42258.6	286	0	17172	Ascl1
11	96990400	97029300	38900	42252	287	0	83395	Sp6
11	95817200	95854400	37200	42243.6	288	0	66610	Abi3
2	180750500	180784050	33550	42236.3	289	0	140489	Bhlhe23
11	82919350	82957350	38000	42208.6	290	0	76392	Slfn5os
2	127331450	127377300	45850	42009.8	291	0	215095	Astl
7	116023700	116042900	19200	41909.4	292	0	68469	Sox6os
17	34170400	34219700	49300	41613.3	293	0	21355	Tap2
2	131544950	131571600	26650	41535.7	294	0	11550	Adra1d
11	77900800	77963950	63150	41472.7	295	0	791423	Gm11190
4	114775850	114852700	76850	41410.2	296	0	433746	Gm12830
2	152903000	152959500	56500	41382.4	297	0	252864	Dusp15
8	91795300	91812300	17000	41343.9	298	0	16373	Irx3
15	7802750	7821750	19000	41169.5	299	0	14573	Gdnf
12	33947050	33977450	30400	40922.1	300	0	22160	Twist1
19	37424450	37446850	22400	40778.1	301	0	15242	Hhex
11	49601900	49645900	44000	40695	302	0	14257	Flt4
1	120335750	120355600	19850	40592.7	303	0	226359	C1ql2
19	44820600	44856950	36350	40575.1	304	0	73322	1700039E22Rik
7	48952350	49019950	67600	40416.4	305	0	78286	Nav2
15	102727450	102778250	50800	40358.4	306	0	67488	Calcoco1
6	8937050	8961050	24000	40344.3	307	0	18231	Nxph1
8	121337500	121401150	63650	40104.3	308	0	108148	Galnt2
15	82195350	82227850	32500	40076.6	309	0	723897	Mir33
5	147713500	147738650	25150	39946.4	310	0	14254	Flt1
15	99216600	99240950	24350	39845.8	311	0	16512	Kcnh3
6	91399150	91450950	51800	39799.4	312	0	75787	4930471M09Rik
6	51167750	51198900	31150	39768.7	313	0	387166	Mir148a
11	4737050	4765400	28350	39753.4	314	0	67178	Zmat5
15	85563350	85591950	28600	39321.5	315	0	22422	Wnt7b
3	107437400	107467300	29900	39148.1	316	0	99738	Kcnc4
12	111264100	111279600	15500	39111.9	317	0	93835	Amn
8	70075400	70097900	22500	39081.4	318	0	330790	Hapln4
14	34810600	34827650	17050	38985.7	319	0	14803	Grid1
4	117471500	117510950	39450	38736.5	320	0	66743	Rnf220
19	46129000	46151350	22350	38476.6	321	0	18742	Pitx3
11	97080900	97151300	70400	38455.4	322	0	73174	Tbkbp1
4	152267000	152305650	38650	38165.8	323	0	70025	Acot7
7	78559750	78607400	47650	38135.3	324	0	414121	E430016F16Rik
2	146210800	146230000	19200	37823.7	325	0	78774	Cfap61
14	70062500	70094250	31750	37820.2	326	0	13655	Egr3
17	56114950	56163650	48700	37692.6	327	0	76905	Lrg1
4	138382350	138402250	19900	37676.2	328	0	625638	Fam43b
6	84571800	84595200	23400	37382	329	0	232174	Cyp26b1
15	79143050	79186400	43350	37288.5	330	0	69833	Polr2f
10	62124800	62142500	17700	37081.1	331	0	69894	Fam241b
11	82378750	82399700	20950	37009.3	332	0	270893	Tmem132e
2	119311550	119338100	26550	36949.9	333	0	54485	Dll4
19	46302900	46329700	26800	36826.3	334	0	73728	Psd
12	86417200	86437500	20300	36756.8	335	0	26380	Esrrb
4	120253350	120291050	37700	36574	336	0	329934	Foxo6
13	31551000	31576250	25250	36477.7	337	0	71307	1700018A04Rik
10	67526600	67543500	16900	36351.6	338	0	13654	Egr2
1	75348800	75395600	46800	36039.3	339	0	13346	Des
5	33683500	33736400	52900	35977.2	340	0	14184	Fgfr3
3	102001950	102026850	24900	35950.6	341	0	18072	Nhlh2
2	94231000	94253500	22500	35948	342	0	723953	Mir129-2
11	102925800	102973450	47650	35881	343	0	69739	2410004I01Rik
8	12288800	12347200	58400	35849.6	344	0	434280	Sox1ot
8	92660600	92683550	22950	35395.1	345	0	64379	Irx6
3	83095000	83135850	40850	35338.7	346	0	100534287	Dchs2
8	70365050	70389200	24150	35336.2	347	0	382056	Crtc1
7	3406000	3433500	27500	35294.9	348	0	81905	Cacng8
7	132590350	132607850	17500	35216.4	349	0	20231	Nkx1-2
19	6919150	6943200	24050	35168.1	350	0	67077	Catsperz
19	44498350	44519900	21550	34951.1	351	0	240667	Sec31b
18	80695800	80733550	37750	34735.8	352	0	18018	Nfatc1
1	135908500	135945100	36600	34698	353	0	18772	Pkp1
13	98495900	98509050	13150	34514.1	354	0	70090	2310005E17Rik
17	45522300	45559500	37200	34510.3	355	0	21645	Tcte1
2	24466850	24485150	18300	34415.7	356	0	18510	Pax8
17	27496150	27527050	30900	34232.1	357	0	268934	Grm4
8	14089350	14107200	17850	34159.4	358	0	244310	Dlgap2
5	143353350	143383150	29800	34039.5	359	0	170935	Grid2ip
6	70942600	70967850	25250	33998.2	360	0	232077	Foxi3
5	37885400	37923900	38500	33997.9	361	0	102637176	Gm20052
5	75141750	75164650	22900	33946.2	362	0	18595	Pdgfra
9	32533650	32553700	20050	33734.9	363	0	14247	Fli1
2	130569900	130585250	15350	33730	364	0	18429	Oxt
10	127074400	127097250	22850	33679.3	365	0	216440	Os9
15	79487700	79521400	33700	33675.9	366	0	16520	Kcnj4
9	31901600	31924350	22750	33619.5	367	0	12023	Barx2
4	134335700	134378000	42300	33600.8	368	0	56219	Extl1
7	98825900	98853600	27700	33553.4	369	0	22411	Wnt11
4	130128900	130188050	59150	33407.8	370	0	94242	Tinagl1
7	45817800	45877650	59850	33355.8	371	0	68137	Kdelr1
4	124877200	124903750	26550	33317.9	372	0	73628	1700125G02Rik
2	119734500	119763450	28950	33288.7	373	0	76246	Rtf1
15	97988050	98017300	29250	33283.1	374	0	12824	Col2a1
4	41722400	41748100	25700	33194.5	375	0	550619	Arid3c
2	152023500	152062050	38550	33170.4	376	0	69698	Slc52a3
7	45401350	45426100	24750	33105.2	377	0	78405	Ntf5
14	70616550	70651200	34650	33047.1	378	0	328440	Npm2
4	154131100	154145650	14550	33022.5	379	0	59002	Wrap73
10	127161700	127192150	30450	33010.4	380	0	80904	Dtx3
14	79764100	79782900	18800	32959.4	381	0	18530	Pcdh8
8	121711400	121768650	57250	32956.7	382	0	57340	Jph3
13	54730800	54771450	40650	32950.2	383	0	26913	Gprin1
11	118894450	118915800	21350	32945.8	384	0	52897	Rbfox3
2	163197000	163249700	52700	32854.4	385	0	269389	Tox2
5	106547500	106585550	38050	32825.6	386	0	52397	Zfp644
8	46285250	46305750	20500	32703.1	387	0	234219	Helt
17	8794050	8813300	19250	32701	388	0	23984	Pde10a
9	37524250	37559700	35450	32659.4	389	0	69524	Esam
11	53452400	53483200	30800	32266.4	390	0	71774	Shroom1
2	180324750	180346000	21250	32175.8	391	0	14464	Gata5
2	22612700	22632650	19950	32131	392	0	667663	Myo3a
11	66515550	66536700	21150	32086.1	393	0	380702	Shisa6
14	46371850	46400600	28750	32059.4	394	0	12159	Bmp4
5	118155650	118183400	27750	32013.5	395	0	12123	Hrk
9	119559200	119590200	31000	31991.3	396	0	20271	Scn5a
18	6998900	7014450	15550	31824	397	0	210719	Mkx
4	11375000	11394400	19400	31792.5	398	0	207920	Esrp1
2	116055100	116080550	25450	31606.1	399	0	69974	2810405F15Rik
11	95568900	95602700	33800	31601.7	400	0	18053	Ngfr
19	42407400	42444650	37250	31523.8	401	0	72832	Crtac1
12	110181100	110205200	24100	31493.1	402	0	67280	3110009F21Rik
2	29233600	29267900	34300	31440.9	403	0	76220	6530402F18Rik
9	57496000	57508150	12150	31419.8	404	0	102614	Rpp25
4	107429900	107455000	25100	31304.5	405	0	230587	Glis1
9	110714400	110753650	39250	31280.1	406	0	19228	Pth1r
3	131100400	131120400	20000	31225.9	407	0	16842	Lef1
7	101810150	101828450	18300	31214.8	408	0	16332	Inppl1
17	93189250	93209150	19900	31056.1	409	0	11516	Adcyap1
17	48087050	48101950	14900	30900.9	410	0	68224	1700067P10Rik
1	119402300	119432800	30500	30895.6	411	0	16324	Inhbb
18	38197100	38219000	21900	30888.5	412	0	75599	Pcdh1
10	80288050	80328400	40350	30734.5	413	0	70248	Dazap1
5	31121450	31142600	21150	30716.1	414	0	58522	Trim54
2	164398600	164418750	20150	30627.4	415	0	19668	Rbpjl
15	76510900	76525950	15050	30598.9	416	0	170729	Scrt1
7	142644900	142668900	24000	30531	417	0	723874	Mir483
2	10351600	10382950	31350	30467.1	418	0	353282	Sfmbt2
11	6057950	6073700	15750	30418.7	419	0	12323	Camk2b
2	170483350	170504850	21500	30403.4	420	0	13081	Cyp24a1
6	55098700	55129350	30650	30337.1	421	0	12922	Crhr2
12	109028500	109062800	34300	30245.5	422	0	380785	Begain
4	117293050	117329500	36450	30111.1	423	0	66743	Rnf220
11	103633400	103658700	25300	30079.4	424	0	69444	Lyzl6
14	55759700	55792850	33150	30033.2	425	0	57260	Ltb4r2
12	99962700	99974750	12050	29994.7	426	0	217826	Kcnk13
12	108313700	108345450	31750	29862.3	427	0	214305	Hhipl1
11	102139400	102151750	12350	29744.2	428	0	217214	Nags
X	60881800	60903700	21900	29724.8	429	0	20675	Sox3
7	81977700	82006450	28750	29708.6	430	0	12173	Bnc1
2	25569200	25585050	15850	29599.3	431	0	75454	Phpt1
4	139060650	139099100	38450	29577.1	432	0	17965	Nbl1
16	17910600	17939700	29100	29558.1	433	0	27886	Ess2
4	45809100	45833900	24800	29533.3	434	0	75426	Igfbpl1
9	37420550	37441300	20750	29331	435	0	19649	Robo3
16	11971200	11997850	26650	29294.1	436	0	72555	Shisa9
2	163848700	163894550	45850	29234	437	0	241770	Rims4
4	123170250	123203550	33300	29098.2	438	0	230718	Nt5c1a
7	44580250	44610550	30300	29081.2	439	0	71960	Myh14
10	81238700	81297200	58500	29065.5	440	0	66047	Mrpl54
5	30095450	30120800	25350	29010.5	441	0	97212	Hadha
7	142958950	142981450	22500	28984.7	442	0	17173	Ascl2
4	48044300	48060950	16650	28724.5	443	0	18124	Nr4a3
4	120691000	120752900	61900	28712.9	444	0	60613	Kcnq4
14	68067700	68091250	23550	28703.9	445	0	18040	Nefm
5	37005050	37045900	40850	28699.3	446	0	76071	Jakmip1
14	66628800	66649000	20200	28688.7	447	0	11549	Adra1a
19	6415050	6432950	17900	28653.2	448	0	19395	Rasgrp2
9	89862400	89894700	32300	28610.8	449	0	74700	4930524O08Rik
18	82400250	82415950	15700	28574.7	450	0	14427	Galr1
15	98160100	98185450	25350	28482.4	451	0	78541	Asb8
11	50842900	50855800	12900	28479.6	452	0	108072	Grm6
4	140235700	140253750	18050	28477.8	453	0	230868	Igsf21
6	119296150	119339450	43300	28463.9	454	0	319734	Cacna2d4
11	75161300	75177300	16000	28347.6	455	0	387208	Mir212
11	44607700	44627500	19800	28310.1	456	0	13591	Ebf1
17	87779800	87810250	30450	28223.2	457	0	210741	Kcnk12
14	29703800	29733900	30100	28113.7	458	0	12294	Cacna2d3
9	45127350	45154100	26750	28080.1	459	0	72821	Scn2b
15	72534200	72560750	26550	28060.9	460	0	223604	Kcnk9
18	35647050	35659850	12800	27986	461	0	71242	Spata24
8	70723100	70751150	28050	27975.3	462	0	110385	Pde4c
11	4936050	4965350	29300	27951.6	463	0	380684	Nefh
4	153465500	153490600	25100	27947	464	0	230959	Ajap1
3	18046950	18064300	17350	27905.4	465	0	59058	Bhlhe22
10	60683850	60707100	23250	27904.9	466	0	22295	Cdh23
4	46982200	47015600	33400	27896.2	467	0	242425	Gabbr2
5	120680200	120721450	41250	27843.5	468	0	14357	Dtx1
10	19838550	19856800	18250	27828.3	469	0	76157	Slc35d3
15	95631900	95661250	29350	27767	470	0	223843	Dbx2
13	56205300	56237250	31950	27729.4	471	0	75245	4930550C17Rik
15	101035700	101059900	24200	27699.8	472	0	668225	Fignl2
4	154538050	154607700	69650	27683	473	0	70673	Prdm16
X	71653850	71676500	22650	27613.5	474	0	14765	Gpr50
3	103563650	103587850	24200	27547.8	475	0	54524	Syt6
1	134637000	134654800	17800	27427.1	476	0	20980	Syt2
2	150680450	150699000	18550	27303	477	0	114889	Vsx1
2	172726300	172743950	17650	27288.3	478	0	12162	Bmp7
2	157902250	157943100	40850	27275.9	479	0	277432	Vstm2l
8	22960850	22989200	28350	27239.5	480	0	11733	Ank1
19	5057150	5092850	35700	27229.7	481	0	70445	Cd248
5	112567400	112587350	19950	27166.3	482	0	67325	1700034G24Rik
12	112119450	112152750	33300	27001.5	483	0	668303	Kif26a
2	164160750	164184750	24000	26977.5	484	0	209232	Wfdc5
4	134243350	134262700	19350	26966	485	0	77490	Zfp593os
X	103675750	103742900	67150	26959.3	486	0	20502	Slc16a2
7	123975300	123996600	21300	26848.5	487	0	628779	Hs3st4
5	67594100	67615150	21050	26835.6	488	0	330096	Shisa3
15	98890600	98901650	11050	26805.6	489	0	69159	Rhebl1
11	63909750	63931600	21850	26765.4	490	0	54710	Hs3st3b1
14	70869600	70906900	37300	26751.5	491	0	73648	2410012E07Rik
7	63741400	63765750	24350	26681.7	492	0	170711	Otud7a
11	76661650	76678400	16750	26579.4	493	0	320522	Bhlha9
14	33912550	33940000	27450	26577.8	494	0	14560	Gdf10
17	46439100	46472850	33750	26488.2	495	0	106763	Ttbk1
7	135388800	135413950	25150	26474.6	496	0	270004	Foxi2
7	51619600	51634100	14500	26456.2	497	0	140919	Slc17a6
5	125527450	125538200	10750	26321.7	498	0	208151	Tmem132b
1	132185200	132217900	32700	26211.5	499	0	723818	Mir135b
6	126634850	126654550	19700	26199.2	500	0	16485	Kcna1
7	19513750	19527750	14000	26112	501	0	69547	Nkpd1
16	35145700	35175250	29550	26101.1	502	0	224129	Adcy5
17	23731850	23754200	22350	26066.1	503	0	76498	Paqr4
19	45060950	45090450	29500	25939.8	504	0	107250	Kazald1
5	101516700	101546500	29800	25818.7	505	0	18096	Nkx6-1
5	98248650	98259700	11050	25814.6	506	0	14176	Fgf5
6	49814900	49830400	15500	25537.6	507	0	109648	Npy
9	21236750	21253750	17000	25509	508	0	94226	S1pr5
13	98563300	98595800	32500	25501.8	509	0	68344	Tmem174
15	64904200	64927900	23700	25467.4	510	0	11514	Adcy8
6	113870250	113918350	48100	25438.2	511	0	11941	Atp2b2
11	104127300	104149600	22300	25436.1	512	0	12921	Crhr1
1	127667900	127690650	22750	25343.8	513	0	72160	Tmem163
7	140913750	140929750	16000	25320.8	514	0	101613	Nlrp6
2	168760750	168774500	13750	25316.1	515	0	99377	Sall4
7	49666650	49692050	25400	25256.1	516	0	13172	Dbx1
1	19092100	19122750	30650	25236.6	517	0	226896	Tfap2d
17	85788700	85809300	20600	25134.5	518	0	20472	Six2
19	54041550	54056350	14800	25127.4	519	0	11551	Adra2a
X	137091900	137107350	15450	25080.7	520	0	13984	Esx1
11	95902150	95928000	25850	25025.7	521	0	14422	B4galnt2
19	30534200	30555200	21000	25006.6	522	0	546723	Ppp1r2-ps3
8	123881100	123899050	17950	24944.3	523	0	234865	Nup133
5	38269700	38285400	15700	24928.4	524	0	21906	Otop1
2	144322800	144340450	17650	24922.2	525	0	107586	Ovol2
7	81444450	81468600	24150	24870.7	526	0	12877	Cpeb1
17	32386450	32406050	19600	24803.8	527	0	664702	A530088E08Rik
17	79704400	79723300	18900	24780.7	528	0	13078	Cyp1b1
4	126279300	126304750	25450	24771.3	529	0	329941	Col8a2
17	25461700	25507100	45400	24716.1	530	0	71840	Tekt4
11	70210550	70231400	20850	24546.9	531	0	69309	Slc16a13
12	31548850	31565200	16350	24517.7	532	0	23985	Slc26a4
19	42189900	42213350	23450	24480.7	533	0	54612	Sfrp5
14	21975750	21998800	23050	24416	534	0	218820	Zfp503
16	35523600	35551350	27750	24327.8	535	0	20357	Sema5b
6	51991000	52015200	24200	24292.4	536	0	54353	Skap2
11	87757900	87774350	16450	24268.7	537	0	207777	Tspoap1
16	20587800	20602350	14550	24242.8	538	0	328643	Vwa5b2
13	30743750	30762050	18300	24201.3	539	0	16364	Irf4
2	131050100	131067950	17850	24194.7	540	0	110751	Adam33
13	94587000	94615650	28650	24129	541	0	11774	Ap3b1
2	118882900	118902100	19200	24120.7	542	0	56357	Ivd
8	75189550	75223650	34100	24102.3	543	0	75141	Rasd2
19	5552300	5573800	21500	24056.8	544	0	381201	Ap5b1
9	58812950	58831150	18200	24036.7	545	0	330953	Hcn4
10	103024850	103039500	14650	23944.8	546	0	216285	Alx1
4	154947600	154967450	19850	23931.9	547	0	269614	Pank4
8	122666300	122696450	30150	23914.4	548	0	12398	Cbfa2t3
6	114274800	114288500	13700	23911.2	549	0	232333	Slc6a1
11	94465000	94506000	41000	23868.4	550	0	71889	Epn3
2	127639500	127671750	32250	23862.2	551	0	17153	Mal
4	41491000	41514250	23250	23799.9	552	0	73721	Spmip6
7	28283800	28307600	23800	23769.9	553	0	66525	Timm50
1	163304550	163322550	18000	23705.3	554	0	18933	Prrx1
17	12494650	12514650	20000	23698.9	555	0	20519	Slc22a3
12	109438450	109470250	31800	23657.7	556	0	13386	Dlk1
5	114261550	114286000	24450	23644.3	557	0	116810	Foxn4
15	11028500	11045550	17050	23641	558	0	239336	Rxfp3
11	59129100	59145200	16100	23635.6	559	0	380698	Obscn
7	47121000	47138650	17650	23623.9	560	0	19259	Ptpn5
11	120644950	120669350	24400	23571.2	561	0	77583	Notum
1	172324100	172361850	37750	23533.1	562	0	16524	Kcnj9
7	40890500	40909550	19050	23479.2	563	0	58188	Vstm2b
X	152162400	152235850	73450	23443	564	0	245666	Iqsec2
9	56789000	56808850	19850	23405.6	565	0	235402	Lingo1
5	138981400	139002700	21300	23303.8	566	0	18590	Pdgfa
6	91278650	91306050	27400	23289.5	567	0	14115	Fbln2
9	121484050	121499950	15900	23288.8	568	0	12424	Cck
2	174275350	174303150	27800	23211.3	569	0	56802	Gnasas1
1	156195200	156210950	15750	23202.5	570	0	329274	Fam163a
2	148390200	148411600	21400	23197.6	571	0	21824	Thbd
7	131613150	131654600	41450	23089.7	572	0	14183	Fgfr2
9	107226050	107244100	18050	23077.6	573	0	208869	Dock3
9	111301250	111324200	22950	23025.7	574	0	320429	Trank1
8	94170650	94190850	20200	22903.5	575	0	17750	Mt2
5	112140050	112187450	47400	22850.2	576	0	75569	1700028D13Rik
9	114553850	114568100	14250	22819.1	577	0	636931	Trim71
15	80280250	80297450	17200	22816.7	578	0	239556	Cacna1i
2	79448400	79461500	13100	22765.9	579	0	228094	Cerkl
1	191175300	191197000	21700	22764.2	580	0	11910	Atf3
12	53241250	53252600	11350	22750.1	581	0	27386	Npas3
17	83082350	83133150	50800	22740.7	582	0	100503434	Gm19689
1	91790400	91812950	22550	22737	583	0	13345	Twist2
11	52758600	52787800	29200	22733.4	584	0	320027	Fstl4
14	58068250	58081650	13400	22724.9	585	0	14180	Fgf9
7	36684400	36703500	19100	22680.1	586	0	243931	Tshz3
12	86200350	86224500	24150	22634.5	587	0	328136	Gm805
2	156601450	156623400	21950	22615.9	588	0	228836	Dlgap4
11	59166350	59181650	15300	22613.6	589	0	118454	Gjc2
13	116702500	116718250	15750	22523.7	590	0	74680	4930435F18Rik
14	63567750	63609400	41650	22514.4	591	0	219149	Xkr6
5	37147300	37181800	34500	22500.2	592	0	76071	Jakmip1
18	80357450	80374800	17350	22440.1	593	0	240444	Kcng2
2	115848950	115864800	15850	22390.3	594	0	17536	Meis2
11	120521950	120542550	20600	22348.4	595	0	14527	Gcgr
13	56746700	56764350	17650	22264.6	596	0	17129	Smad5
8	108688350	108704450	16100	22183.1	597	0	11906	Zfhx3
15	89369000	89393650	24650	22150.5	598	0	75459	Syce3
11	116279650	116286950	7300	22122.2	599	0	14428	Galr2
8	11472750	11498500	25750	22110.9	600	0	69225	Naxd
X	141713700	141732850	19150	22105.1	601	0	16370	Irs4
14	39467450	39480200	12750	22071.2	602	0	18183	Nrg3
18	67126450	67142800	16350	22061	603	0	14680	Gnal
11	81140600	81167800	27200	22035.1	604	0	11418	Asic2
7	30627000	30642600	15600	22030.2	605	0	71909	Haus5
6	87720750	87741850	21100	21974.5	606	0	613264	Cfap92
12	30876400	30893350	16950	21960	607	0	11431	Acp1
11	84950550	84963350	12800	21831.4	608	0	12351	Car4
16	8407850	8431750	23900	21818.8	609	0	74720	Tmem114
10	90813350	90836250	22900	21766.8	610	0	77531	Anks1b
6	91835650	91849800	14150	21748.3	611	0	243547	Grip2
9	120292100	120309250	17150	21740.8	612	0	245049	Myrip
8	15007150	15041850	34700	21736.4	613	0	74901	Kbtbd11
11	82422650	82453000	30350	21697.6	614	0	270893	Tmem132e
2	31308250	31320300	12050	21677.8	615	0	665700	Hmcn2
10	61968900	61997800	28900	21656	616	0	12817	Col13a1
6	67529100	67543350	14250	21636.4	617	0	56753	Tacstd2
11	5049500	5067000	17500	21616.7	618	0	78926	Gas2l1
10	44452200	44487200	35000	21614	619	0	12142	Prdm1
5	113446500	113495900	49400	21593.2	620	0	320916	Wscd2
19	25502450	25515600	13150	21563.2	621	0	50796	Dmrt1
7	131955300	131982250	26950	21544.5	622	0	233919	Gpr26
11	50592100	50613500	21400	21465.7	623	0	216725	Adamts2
6	127757900	127777800	19900	21465.7	624	0	381813	Prmt8
17	74039350	74053050	13700	21434.5	625	0	94224	Srd5a2
5	117832350	117848100	15750	21388	626	0	18125	Nos1
12	86977100	86997950	20850	21362.1	627	0	238331	Zdhhc22
13	3353850	3362650	8800	21359.1	628	0	76937	2810429I04Rik
11	95116250	95127450	11200	21337.4	629	0	13393	Dlx3
2	69579750	69595150	15400	21314.5	630	0	14725	Lrp2
8	104532300	104547850	15550	21299.7	631	0	234664	Nae1
1	87256600	87278550	21950	21290.9	632	0	98363	Efhd1
6	29163750	29183550	19800	21290.6	633	0	68272	Rbm28
7	79039500	79068150	28650	21286.8	634	0	11595	Acan
12	84621100	84655950	34850	21277.6	635	0	432677	Vrtn
19	7123000	7169950	46950	21258.7	636	0	107227	Macrod1
9	71208350	71225400	17050	21236	637	0	19378	Aldh1a2
1	135079500	135111550	32050	21224.4	638	0	329252	Lgr6
10	7386650	7397300	10650	21206.8	639	0	77777	Ulbp1
15	73827300	73871750	44450	21162.2	640	0	268816	Mroh5
10	127044150	127054600	10450	21161.5	641	0	17299	Mettl1
5	24342700	24393000	50300	21147.5	642	0	213948	Atg9b
19	53664950	53687550	22600	21119.1	643	0	73713	Rbm20
9	45428500	45438400	9900	21108.7	644	0	74602	4833428L15Rik
3	89820500	89839800	19300	21106.3	645	0	214547	She
1	50921150	50932300	11150	21082.9	646	0	56363	Tmeff2
6	117990800	118030200	39400	21076.1	647	0	70727	Rasgef1a
6	72202250	72246500	44250	21047.1	648	0	71093	Atoh8
15	31358050	31377800	19750	20940.4	649	0	67434	Ankrd33b
7	31032000	31058850	26850	20939.9	650	0	57780	Fxyd7
17	83625550	83637650	12100	20921.8	651	0	225030	Kcng3
9	108818150	108846900	28750	20905.8	652	0	80987	Nckipsd
7	109162000	109205250	43250	20891.3	653	0	109594	Lmo1
15	73636300	73699250	62950	20889.9	654	0	239530	Gpr20
5	93037050	93051150	14100	20835.7	655	0	78088	Sowahb
2	31872900	31892700	19800	20788.1	656	0	23928	Lamc3
7	16467250	16482100	14850	20774.5	657	0	18142	Npas1
5	128590050	128605700	15650	20765.2	658	0	93897	Fzd10
16	18772800	18781750	8950	20764.1	659	0	12741	Cldn5
4	131911550	131928550	17000	20694.7	660	0	623230	Tmem200b
5	30575850	30612600	36750	20676.1	661	0	16527	Kcnk3
5	22338600	22352050	13450	20624	662	0	19699	Reln
8	27221950	27239550	17600	20596.4	663	0	76615	Got1l1
11	102091450	102109950	18500	20582	664	0	217212	Pyy
5	63645100	63658000	12900	20557.5	665	0	319807	Nwd2
2	36193300	36214500	21200	20557.5	666	0	67871	Mrrf
12	72819350	72858450	39100	20519.1	667	0	19042	Ppm1a
13	23389150	23404900	15750	20431.5	668	0	75887	4930586N03Rik
2	181012350	181053350	41000	20399.2	669	0	73368	Col20a1
17	15368250	15389350	21100	20350	670	0	13388	Dll1
17	24743250	24765500	22250	20297.9	671	0	328779	Hs3st6
6	112483450	112494300	10850	20287.8	672	0	18430	Oxtr
5	130436550	130452050	15500	20257.5	673	0	140904	Caln1
2	181666700	181681950	15250	20191.8	674	0	21400	Tcea2
10	112263250	112276150	12900	20155.2	675	0	268345	Kcnc2
11	114772900	114799700	26800	20132.9	676	0	72014	Btbd17
X	37039350	37058150	18800	20119.1	677	0	245381	Sowahd
12	58207650	58219300	11650	20119.1	678	0	20605	Sstr1
4	136230850	136265700	34850	20112.8	679	0	230837	Asap3
7	141941900	141957750	15850	20100.8	680	0	75770	Brsk2
5	118010250	118032500	22250	20086.4	681	0	57816	Tesc
5	134983100	134995150	12050	20081.6	682	0	71304	Wbscr25
X	7915550	7933150	17600	20072.7	683	0	668963	Btbd35f20
7	4826200	4847900	21700	20040.2	684	0	67441	Isoc2b
5	34277050	34300350	23300	19980.2	685	0	231125	Zfyve28
7	34797950	34821450	23500	19954.7	686	0	68947	Chst8
11	35539700	35598350	58650	19938.5	687	0	20564	Slit3
16	9988750	9999850	11100	19929.6	688	0	14811	Grin2a
9	95552000	95570350	18350	19926.1	689	0	75552	Paqr9
1	154716250	154735800	19550	19913.7	690	0	12290	Cacna1e
9	32655950	32698300	42350	19904	691	0	23871	Ets1
5	143278650	143298550	19900	19897.5	692	0	330230	Zfp853
10	79915950	79928350	12400	19875.9	693	0	13496	Arid3a
6	114028700	114052500	23800	19867.9	694	0	11941	Atp2b2
9	102341550	102359150	17600	19856.7	695	0	270190	Ephb1
9	20718000	20746300	28300	19839.1	696	0	244723	Olfm2
16	5118100	5137700	19600	19754.1	697	0	19041	Ppl
13	69729450	69755250	25800	19724.8	698	0	76980	Ube2ql1
2	113751350	113765250	13900	19708.3	699	0	23892	Grem1
4	150024800	150037800	13000	19696.7	700	0	100198	H6pd
2	18793550	18805100	11550	19692.7	701	0	66774	Carlr
11	112772800	112794400	21600	19685.2	702	0	217294	BC006965
6	118187000	118209200	22200	19672.7	703	0	19713	Ret
9	56607300	56648550	41250	19643.7	704	0	235402	Lingo1
4	154071900	154107000	35100	19609.7	705	0	22062	Trp73
15	37226250	37235750	9500	19594.2	706	0	252973	Grhl2
9	32338550	32350200	11650	19564.2	707	0	16521	Kcnj5
19	40872350	40895700	23350	19532.5	708	0	72672	Zfp518a
6	121438950	121496100	57150	19491.3	709	0	243621	Iqsec3
19	58446250	58462050	15800	19478.2	710	0	14585	Gfra1
18	74438200	74451350	13150	19470	711	0	17919	Myo5b
11	61010250	61030850	20600	19442.9	712	0	16515	Kcnj12
8	32874350	32889900	15550	19426.7	713	0	211323	Nrg1
7	144886350	144907950	21600	19412.9	714	0	14170	Fgf15
2	153065200	153079700	14500	19412	715	0	228788	Ccm2l
7	128410500	128428850	18350	19401.3	716	0	67865	Rgs10
11	115846150	115871150	25000	19366.7	717	0	217325	Llgl2
6	32577700	32596100	18400	19359.1	718	0	243743	Plxna4
7	49967250	49986800	19550	19349.2	719	0	338352	Nell1
17	47390100	47421700	31600	19318.5	720	0	75462	Cimip3
18	25670550	25699100	28550	19311	721	0	108013	Celf4
6	29481800	29513850	32050	19219	722	0	333088	Kcp
19	41730700	41757150	26450	19208	723	0	20562	Slit1
15	87538050	87560000	21950	19194	724	0	106014	Tafa5
7	100002850	100032300	29450	19186.7	725	0	69121	Chrdl2
14	51736950	51745500	8550	19182.1	726	0	219033	Ang4
18	21647950	21661000	13050	19181.4	727	0	74644	4930426D05Rik
7	121385450	121401250	15800	19172.9	728	0	195646	Hs3st2
1	40675350	40686850	11500	19131.1	729	0	226999	Slc9a2
9	69657150	69677350	20200	19098.6	730	0	64290	Foxb1
7	110621000	110635450	14450	19093.1	731	0	11535	Adm
10	43994950	44010350	15400	19086.8	732	0	11630	Crybg1
5	33990900	34015700	24800	19076	733	0	272158	Poln
17	35463100	35477950	14850	19071.1	734	0	15007	H2-Q10
17	33967600	33983100	15500	19068.8	735	0	630499	H2-K2
5	135083400	135112350	28950	19047	736	0	58805	Mlxipl
14	57098900	57112850	13950	19029.8	737	0	14619	Gjb2
5	73645200	73661600	16400	18962	738	0	73472	Spata18
11	103353850	103368850	15000	18953.1	739	0	544817	Arhgap27
7	115183600	115228700	45100	18928.3	740	0	101786	A730082K24Rik
2	180365400	180395050	29650	18845.2	741	0	387136	Mir1a-1
19	45291300	45314400	23100	18840.6	742	0	102465114	Mir3084-2
4	129963400	129993900	30500	18829.3	743	0	72225	1700003M07Rik
6	124980950	125006000	25050	18812.9	744	0	319352	Pianp
11	74581700	74595950	14250	18794.3	745	0	380711	Rap1gap2
14	28497100	28513950	16850	18787.5	746	0	22418	Wnt5a
3	107093000	107108800	15800	18787.3	747	0	16490	Kcna2
9	61302600	61370200	67600	18766.7	748	0	21887	Tle3
2	168263650	168287650	24000	18731.3	749	0	241794	Kcng1
11	33815400	33863000	47600	18729.8	750	0	70357	Kcnip1
9	64380750	64396150	15400	18705.1	751	0	214058	Megf11
8	84035950	84053400	17450	18686.4	752	0	50931	Il27ra
13	56432700	56451150	18450	18686	753	0	328258	Slc25a48
1	121165900	121190750	24850	18659.4	754	0	98452	Celrr
4	138442500	138477150	34650	18655.9	755	0	66259	Camk2n1
2	31837650	31852850	15200	18640.7	756	0	98970	Fibcd1
11	101947100	101969700	22600	18624.8	757	0	74499	Sost
13	96122950	96139350	16400	18591.8	758	0	75209	Sv2c
11	52161250	52175900	14650	18586.7	759	0	257871	Or2y7
12	98566650	98581650	15000	18540.7	760	0	72258	Kcnk10
5	137016100	137036650	20550	18520.8	761	0	381677	Vgf
7	82329400	82347250	17850	18508.1	762	0	269959	Adamtsl3
18	36186450	36222050	35600	18470.9	763	0	100042150	Nrg2
12	102125200	102135600	10400	18377.8	764	0	238384	Slc24a4
11	97621650	97634050	12400	18374.4	765	0	69729	2410003L11Rik
2	25860650	25889550	28900	18360.4	766	0	227632	Kcnt1
6	55443200	55466950	23750	18356.2	767	0	11517	Adcyap1r1
2	29741050	29754800	13750	18350.4	768	0	433415	Gm13420
7	130930000	130941800	11800	18350.3	769	0	56213	Htra1
11	3756750	3784100	27350	18336.7	770	0	74309	Osbp2
4	148795700	148820000	24300	18335	771	0	69743	Casz1
11	98539350	98552200	12850	18316.9	772	0	69376	Zpbp2
8	23395250	23418500	23250	18313.5	773	0	20377	Sfrp1
5	136559100	136585700	26600	18292	774	0	13047	Cux1
11	93093450	93110550	17100	18282.1	775	0	72605	Car10
6	31548500	31575750	27250	18230.5	776	0	27205	Podxl
7	37763550	37780450	16900	18198.7	777	0	243937	Zfp536
5	75959750	75983300	23550	18194.4	778	0	16542	Kdr
7	138935650	138951350	15700	18177	779	0	74004	Jakmip3
5	143248700	143261000	12300	18106.7	780	0	54201	Zfp316
13	92417650	92432400	14750	18094.7	781	0	218440	Ankrd34b
2	127478000	127488800	10800	18088.5	782	0	56461	Kcnip3
7	46371900	46383500	11600	17931.5	783	0	17927	Myod1
8	25032850	25044950	12100	17866.7	784	0	83436	Plekha2
19	43377000	43391600	14600	17866.7	785	0	545291	Hpse2
10	77672800	77693400	20600	17866.2	786	0	252974	Tspear
4	152334050	152366650	32600	17815.7	787	0	269610	Chd5
7	27318800	27346300	27500	17709.6	788	0	192192	Shkbp1
3	105445250	105460500	15250	17705.4	789	0	78635	Kcnd3os
4	141228850	141253200	24350	17671.4	790	0	213649	Arhgef19
3	93438300	93456000	17700	17639	791	0	99681	Tchh
9	103108350	103122750	14400	17609.7	792	0	270192	Rab6b
1	156297550	156315800	18250	17598.5	793	0	214575	Tdrd5
17	56502000	56526350	24350	17595.7	794	0	20834	Znrf4
16	95575550	95595650	20100	17594.4	795	0	13876	Erg
18	75810050	75836950	26900	17575.9	796	0	207259	Zbtb7c
17	44724150	44743550	19400	17574.7	797	0	12393	Runx2
11	7050950	7072250	21300	17572.6	798	0	432530	Adcy1
10	127318900	127335050	16150	17569.3	799	0	216445	Arhgap9
2	33696800	33730850	34050	17561.5	800	0	72543	Mvb12b
17	35244350	35284750	40400	17552.7	801	0	53817	Ddx39b
13	38138700	38158650	19950	17550	802	0	109620	Dsp
19	48202350	48216400	14050	17535.5	803	0	66673	Sorcs3
14	84440100	84451950	11850	17524.8	804	0	219228	Pcdh17
4	109652800	109669000	16200	17492	805	0	12580	Cdkn2c
7	141287200	141298400	11200	17488.2	806	0	54006	Deaf1
15	89134300	89151300	17000	17488	807	0	29857	Mapk12
11	11107900	11123250	15350	17469.8	808	0	319922	Vwc2
2	180094500	180115200	20700	17467.5	809	0	99296	Hrh3
11	101881350	101927900	46550	17463.9	810	0	17285	Meox1
8	13407100	13459750	52650	17458.3	811	0	272465	Tmem255b
4	47196000	47216200	20200	17455.9	812	0	12819	Col15a1
4	148268350	148299500	31150	17421.5	813	0	242748	Disp3
17	86747100	86763550	16450	17394.6	814	0	13819	Epas1
15	99049000	99066850	17850	17386	815	0	19132	Prph
10	73090100	73105950	15850	17347.1	816	0	11994	Pcdh15
1	180692700	180701100	8400	17330.5	817	0	27217	Mixl1
8	10924350	10968750	44400	17313.2	818	0	665306	3930402G23Rik
19	44871700	44901100	29400	17312.8	819	0	102465114	Mir3084-2
7	5049750	5063200	13450	17301.3	820	0	68992	Zfp580
3	86545800	86553150	7350	17266.2	821	0	80877	Lrba
11	101258100	101275900	17800	17236.2	822	0	69847	Wnk4
7	142073500	142103400	29900	17229.7	823	0	18218	Dusp8
18	66450750	66465100	14350	17162.6	824	0	58801	Pmaip1
15	102684450	102709750	25300	17109.7	825	0	67488	Calcoco1
1	5012200	5029000	16800	17108.9	826	0	58175	Rgs20
11	19001900	19023800	21900	17095.4	827	0	17268	Meis1
11	18865150	18878100	12950	17073.7	828	0	17268	Meis1
8	66683950	66702150	18200	17054.2	829	0	18168	Npy5r
9	14852850	14871100	18250	17039.1	830	0	14608	Gpr83
13	72273150	72310250	37100	17031.3	831	0	16371	Irx1
8	95667550	95682650	15100	17003.6	832	0	234593	Ndrg4
9	34483050	34500150	17100	17000.4	833	0	67703	Kirrel3
2	119232850	119258450	25600	16980.5	834	0	20732	Spint1
2	132933700	132952950	19250	16975.9	835	0	241639	Fermt1
7	34671150	34689350	18200	16969.2	836	0	68947	Chst8
9	8893200	8906450	13250	16966.3	837	0	18667	Pgr
5	138814700	138826600	11900	16919.3	838	0	384244	Foxl3
5	112212600	112234450	21850	16915.1	839	0	330166	Miat
5	73001850	73018400	16550	16907.3	840	0	231290	Slc10a4
5	52104150	52120750	16600	16883.6	841	0	102466648	Mir6417
17	28337150	28370450	33300	16845.4	842	0	22157	Tulp1
17	29882600	29897350	14750	16800.5	843	0	74762	Mdga1
2	172029500	172051500	22000	16752.9	844	0	228942	Cbln4
4	124173750	124202800	29050	16740.4	845	0	78460	1700057H15Rik
2	109669500	109682800	13300	16706.1	846	0	12064	Bdnf
18	25737900	25771750	33850	16698.2	847	0	108013	Celf4
3	27365350	27376050	10700	16683.9	848	0	208188	Ghsr
7	119177000	119199100	22100	16683.6	849	0	209776	Gpr139
19	60452900	60479700	26800	16677.3	850	0	226278	Prlhr
4	141282900	141309200	26300	16658.2	851	0	13836	Epha2
1	62692850	62712500	19650	16648.2	852	0	18187	Nrp2
3	104953350	104969250	15900	16639	853	0	22414	Wnt2b
3	104767300	104792600	25300	16623.7	854	0	71887	Ppm1j
7	143084600	143114600	30000	16595.9	855	0	56843	Trpm5
7	143427000	143450650	23650	16568.2	856	0	16535	Kcnq1
2	152129850	152155850	26000	16564.9	857	0	21407	Tcf15
X	103313300	103338050	24750	16551.3	858	0	12592	Cdx4
11	78480800	78504600	23800	16551.3	859	0	237868	Sarm1
3	29073000	29088200	15200	16509.7	860	0	75740	Egfem1
11	9111250	9124200	12950	16502.1	861	0	22271	Upp1
9	52669100	52685050	15950	16500.5	862	0	382139	Gm1715
9	27786850	27797650	10800	16477.4	863	0	330908	Opcml
2	130350250	130370550	20300	16452	864	0	228598	Ebf4
15	84432850	84459350	26500	16408.2	865	0	72301	Shisal1
4	104364000	104374650	10650	16407.8	866	0	13131	Dab1
9	48827300	48841550	14250	16403.6	867	0	235320	Zbtb16
4	44418700	44432450	13750	16371.3	868	0	17279	Melk
9	78376400	78403250	26850	16365.8	869	0	67968	Ooep
13	73527000	73544000	17000	16360.9	870	0	13162	Slc6a3
8	47405150	47415750	10600	16354.4	871	0	71069	Stox2
8	111383050	111407000	23950	16353.5	872	0	338521	Fa2h
8	11890900	11931250	40350	16351.5	873	0	75528	Tex29
8	106597700	106608000	10300	16341.2	874	0	12550	Cdh1
4	155350900	155369450	18550	16316.2	875	0	18762	Prkcz
18	34537100	34555350	18250	16310	876	0	20890	Wnt8a
18	23031200	23044400	13200	16297.4	877	0	319211	Nol4
8	126126550	126148100	21550	16269.7	878	0	210027	Slc35f3
12	107971850	108007350	35500	16245.3	879	0	58208	Bcl11b
11	118656050	118707150	51100	16242	880	0	52897	Rbfox3
8	122332650	122372900	40250	16222.8	881	0	22761	Zfpm1
5	37239200	37254450	15250	16195.9	882	0	12933	Crmp1
19	36043650	36067150	23500	16180.8	883	0	15566	Htr7
11	71736850	71767000	30150	16172.8	884	0	216881	Wscd1
12	106468050	106485450	17400	16171.1	885	0	76639	1700121N20Rik
4	36948800	36955150	6350	16139.5	886	0	242384	Lingo2
2	155767600	155783200	15600	16136.3	887	0	17391	Mmp24
7	99614350	99635350	21000	16106.6	888	0	100503386	Tpbgl
4	127221350	127245200	23850	16065.1	889	0	80284	Smim12
8	106129750	106142900	13150	16064.3	890	0	77411	Esrp2
4	148393850	148410050	16200	16045.3	891	0	71707	Ubiad1
7	78875400	78891700	16300	16043.6	892	0	723884	Mir7-2
5	30702350	30718750	16400	16038.5	893	0	65254	Dpysl5
2	147076750	147095600	18850	16038.1	894	0	24128	Xrn2
10	40101300	40151000	49700	15987.8	895	0	72472	Slc16a10
19	10449600	10467100	17500	15984.4	896	0	54525	Syt7
9	55020200	55039350	19150	15978.9	897	0	110834	Chrna3
4	130296150	130315300	19150	15957.9	898	0	14077	Fabp3
18	78042000	78056550	14550	15955.6	899	0	620235	Siglec15
10	114796050	114806200	10150	15937.4	900	0	237553	Trhde
7	35163300	35197800	34500	15928.1	901	0	53896	Slc7a10
15	80003450	80030150	26700	15923.6	902	0	18591	Pdgfb
15	83715850	83727600	11750	15913.6	903	0	64706	Scube1
6	39864700	39878300	13600	15895.7	904	0	434008	Tmem178b
7	99258050	99275900	17850	15852	905	0	381967	Gm26705
19	56861700	56879400	17700	15798.9	906	0	83561	Tdrd1
8	84404900	84427100	22200	15775	907	0	12286	Cacna1a
7	57499350	57519150	19800	15752.6	908	0	14402	Gabrb3
4	133491550	133510750	19200	15728.8	909	0	69539	Trnp1
8	123110400	123129500	19100	15706.6	910	0	108148	Galnt2
1	91332700	91351950	19250	15658.1	911	0	70788	Klhl30
8	17528450	17541650	13200	15652.5	912	0	94109	Csmd1
17	51823050	51838500	15450	15622.2	913	0	20230	Satb1
12	84867150	84883750	16600	15618.9	914	0	16997	Ltbp2
10	4701500	4720200	18700	15610.5	915	0	13982	Esr1
2	75130500	75149350	18850	15608.1	916	0	53375	Mtx2
9	43873900	43887850	13950	15606	917	0	58235	Nectin1
18	36314000	36330200	16200	15602.4	918	0	66060	Cystm1
10	61410900	61424850	13950	15575.6	919	0	18119	Nodal
11	69951800	69970150	18350	15558.4	920	0	54351	Elp5
13	38339000	38354350	15350	15553.4	921	0	12161	Bmp6
8	27078950	27106900	27950	15529.2	922	0	78560	Adgra2
15	76275050	76310300	35250	15521.4	923	0	75475	Oplah
6	31212700	31230250	17550	15513.1	924	0	73652	2210408F21Rik
13	84338600	84351600	13000	15512.9	925	0	72745	Tmem161b
5	33476500	33520800	44300	15448.2	926	0	672284	Nkx1-1
12	80513400	80532100	18700	15433	927	0	69522	2310002D06Rik
16	92681650	92701500	19850	15401.1	928	0	12394	Runx1
1	135807050	135824350	17300	15390.7	929	0	21952	Tnni1
5	139654200	139677200	23000	15379.6	930	0	231830	Micall2
2	163329250	163344750	15500	15365.1	931	0	59091	Jph2
8	113836850	113863150	26300	15334.4	932	0	208936	Adamts18
12	100884300	100911800	27500	15331.8	933	0	68339	Ccdc88c
2	118671900	118684300	12400	15286.6	934	0	214230	Pak6
6	7551150	7559200	8050	15255.2	935	0	21333	Tac1
11	72954900	72985050	30150	15221	936	0	53313	Atp2a3
9	16494950	16507900	12950	15207.6	937	0	270120	Fat3
7	98191000	98200100	9100	15198.9	938	0	272411	B3gnt6
1	170892900	170925000	32100	15194.3	939	0	98752	Fcrla
19	56715500	56729150	13650	15179.7	940	0	11554	Adrb1
9	78438300	78450550	12250	15157	941	0	68291	Mto1
3	89311600	89334300	22700	15141.5	942	0	13639	Efna4
X	94223700	94283750	60050	15141.4	943	0	236904	Klhl15
4	137270600	137287050	16450	15105.3	944	0	22417	Wnt4
4	91368850	91378300	9450	15077.6	945	0	15569	Elavl2
6	121404850	121418500	13650	15073.1	946	0	243621	Iqsec3
1	14749650	14759150	9500	15067.5	947	0	17681	Msc
5	37956750	37987800	31050	15062.7	948	0	71116	Stx18
10	81563300	81603450	40150	15014.2	949	0	21886	Tle2
12	29519100	29541350	22250	14995.8	950	0	17933	Myt1l
12	112868150	112882850	14700	14994.9	951	0	56696	Gpr132
9	54748300	54773550	25250	14986.6	952	0	12903	Crabp1
4	155032150	155050550	18400	14972.8	953	0	269615	Plch2
2	124085200	124099500	14300	14963.5	954	0	214968	Sema6d
1	154198500	154207200	8700	14930.9	955	0	100503355	Zfp648
4	106620850	106652200	31350	14925.7	956	0	230577	Pars2
2	126547700	126557300	9600	14916.8	957	0	26458	Slc27a2
3	116244200	116256800	12600	14912.6	958	0	64378	Gpr88
7	79783200	79804650	21450	14912.5	959	0	626359	Wdr93
11	104227000	104238300	11300	14894.5	960	0	17762	Mapt
1	9960200	9975900	15700	14877.2	961	0	69312	Ppp1r42
18	80568700	80621250	52550	14876.1	962	0	18018	Nfatc1
4	127319200	127338000	18800	14868.8	963	0	14620	Gjb3
2	158548650	158584450	35800	14861.6	964	0	545481	Arhgap40
9	30938450	30949450	11000	14823.4	965	0	30806	Adamts8
5	72575750	72592850	17100	14775.6	966	0	545758	Slc10a4-ps
2	180634000	180649900	15900	14774.3	967	0	277353	Tcfl5
8	70887700	70906100	18400	14771.4	968	0	76808	Rpl18a
15	89060000	89071750	11750	14769.2	969	0	69120	1810021B22Rik
10	128929650	128947150	17500	14758.2	970	0	16404	Itga7
9	87007400	87019900	12500	14742.5	971	0	382089	Ripply2
2	168586400	168609000	22600	14742	972	0	18019	Nfatc2
2	149824500	149834850	10350	14728.1	973	0	433485	Syndig1
17	26108800	26123050	14250	14696.3	974	0	60455	Pgap6
17	43623700	43637800	14100	14695.8	975	0	210510	Tdrd6
2	104403350	104421950	18600	14685.7	976	0	241589	D430041D05Rik
2	29024700	29050200	25500	14680.4	977	0	329375	Cfap77
2	45102750	45122500	19750	14667.3	978	0	433424	Zeb2os
6	30953000	30973300	20300	14658.4	979	0	619665	Klf14
2	181196350	181218500	22150	14627.5	980	0	20811	Srms
8	4212150	4229700	17550	14607.9	981	0	73072	Prr36
6	142560900	142576000	15100	14607.2	982	0	16523	Kcnj8
4	154793150	154834100	40950	14604.1	983	0	242800	Ttc34
11	11672700	11692150	19450	14601.1	984	0	22778	Ikzf1
1	134229000	134243050	14050	14597.4	985	0	11539	Adora1
15	83766200	83790650	24450	14591.8	986	0	223726	Mpped1
13	48728550	48747600	19050	14583	987	0	18676	Phf2
1	132873400	132891300	17900	14580.4	988	0	16980	Lrrn2
2	162653900	162668650	14750	14569.2	989	0	77288	9430021M05Rik
7	25668750	25691550	22800	14557.4	990	0	320208	Tmem91
3	90454150	90467100	12950	14551.7	991	0	18160	Npr1
14	119133450	119145450	12000	14522.4	992	0	50787	Hs6st3
8	35818150	35833900	15750	14519	993	0	71908	Cldn23
1	181350300	181356200	5900	14503.5	994	0	72978	Cnih3
2	129673000	129706150	33150	14502.7	995	0	18610	Pdyn
6	28126800	28143050	16250	14496.2	996	0	14823	Grm8
9	114048300	114074400	26100	14478.9	997	0	382111	Susd5
9	57934650	57956500	21850	14455	998	0	20361	Sema7a
8	99410700	99424300	13600	14432.5	999	0	234624	A330008L17Rik
14	118431350	118444850	13500	14423.5	1000	0	73306	1700044C05Rik
12	55595550	55603050	7500	14418.7	1001	0	56856	Insm2
18	86707300	86719150	11850	14408.5	1002	0	12405	Cbln2
1	23756900	23768100	11200	14382	1003	0	280645	B3gat2
1	131951650	131979050	27400	14367.5	1004	0	212980	Slc45a3
18	76530750	76556650	25900	14366.9	1005	0	17126	Smad2
2	25388600	25410800	22200	14360	1006	0	18146	Npdc1
4	143346650	143353750	7100	14353.8	1007	0	242735	Lrrc38
17	23533450	23544250	10800	14343.2	1008	0	320020	6330415G19Rik
X	57911750	57926650	14900	14317.3	1009	0	22773	Zic3
8	11974650	12014900	40250	14312.4	1010	0	75528	Tex29
13	12091100	12115350	24250	14308.1	1011	0	20191	Ryr2
15	78187850	78208250	20400	14301	1012	0	19293	Pvalb
5	128423400	128440900	17500	14285	1013	0	243274	Tmem132d
11	35791800	35804700	12900	14275.8	1014	0	237730	Fbll1
6	143426850	143454000	27150	14271.8	1015	0	75904	4930579D09Rik
7	122283250	122308050	24800	14248.1	1016	0	18751	Prkcb
14	61678950	61693250	14300	14243.5	1017	0	668253	Dleu2
1	184869500	184888250	18750	14243.5	1018	0	226777	C130074G19Rik
17	14198800	14216950	18150	14234.3	1019	0	240025	Dact2
13	51559850	51575150	15300	14203.8	1020	0	20418	Shc3
7	141453950	141472000	18050	14202	1021	0	66853	Pnpla2
2	172928900	172944100	15200	14193.3	1022	0	12162	Bmp7
12	80745250	80761700	16450	14174.3	1023	0	380768	Ccdc177
6	28967150	28992100	24950	14173.8	1024	0	387237	Mir129-1
4	41612750	41644500	31750	14155.5	1025	0	69638	Enho
9	112229200	112241150	11950	14147.3	1026	0	74100	Arpp21
8	9768350	9778100	9750	14145.5	1027	0	270028	Nalf1
11	84635000	84649350	14350	14139.9	1028	0	78471	1700109G15Rik
3	73046950	73065050	18100	14132.4	1029	0	386750	Slitrk3
4	84665500	84682550	17050	14109.7	1030	0	242509	Bnc2
9	121632550	121645000	12450	14094.7	1031	0	69032	Lyzl4
13	72330850	72375250	44400	14088.5	1032	0	328287	Gm20554
18	84715600	84733600	18000	14058.9	1033	0	240479	Dipk1c
2	136056650	136062100	5450	14033.7	1034	0	76161	Lamp5
6	18025450	18036350	10900	14032.3	1035	0	22413	Wnt2
2	155616550	155640100	23550	14026.2	1036	0	735275	Mir499
11	107786950	107804200	17250	14021.1	1037	0	54377	Cacng4
1	134700900	134717700	16800	14012.7	1038	0	20980	Syt2
9	123672100	123684000	11900	13985	1039	0	12769	Ccr9
4	134009600	134022550	12950	13941.5	1040	0	83557	Lin28a
4	63206550	63221350	14800	13939.2	1041	0	373864	Col27a1
13	74117950	74127750	9800	13938.9	1042	0	105243	Slc9a3
16	97603200	97616150	12950	13929.6	1043	0	50528	Tmprss2
6	127147600	127160600	13000	13927.7	1044	0	77558	9330179D12Rik
19	47005850	47022700	16850	13924.9	1045	0	76952	Nt5c2
8	92955000	92967150	12150	13910.1	1046	0	20538	Slc6a2
2	27707600	27753450	45850	13892.7	1047	0	20181	Rxra
1	133158900	133174700	15800	13892.2	1048	0	240753	Plekha6
6	117158800	117174750	15950	13885.5	1049	0	20315	Cxcl12
7	25001650	25017700	16050	13876.4	1050	0	232975	Atp1a3
13	56598750	56633350	34600	13849.9	1051	0	21810	Tgfbi
X	12059300	12100800	41500	13849.8	1052	0	71458	Bcor
11	84763800	84800500	36700	13840	1053	0	217038	Mrm1
15	11898950	11909650	10700	13795.8	1054	0	381002	Gm5144
4	114656050	114670150	14100	13779.1	1055	0	666048	Trabd2b
2	163746850	163789300	42450	13776.3	1056	0	11486	Ada
7	143488250	143509200	20950	13767.9	1057	0	22113	Phlda2
16	22647350	22668250	20900	13742.3	1058	0	110197	Dgkg
8	94679800	94700250	20450	13738.7	1059	0	67801	Pllp
14	111674100	111684450	10350	13737.9	1060	0	75409	Slitrk5
4	135559550	135581650	22100	13721.9	1061	0	230824	Grhl3
7	135830500	135865500	35000	13715.4	1062	0	17345	Mki67
12	76704100	76714750	10650	13708.8	1063	0	20741	Sptb
11	103184300	103203550	19250	13706.9	1064	0	69441	Efcab15
14	56358600	56373700	15100	13677.5	1065	0	192113	Atp12a
8	88443150	88457350	14200	13667.2	1066	0	93960	Nkd1
16	92488500	92502200	13700	13662.7	1067	0	76785	2410124H12Rik
11	116526950	116537950	11000	13652.7	1068	0	217342	Ube2o
2	133541300	133560600	19300	13652.6	1069	0	12156	Bmp2
19	4706750	4723400	16650	13629.1	1070	0	20743	Sptbn2
4	114394350	114413650	19300	13610.3	1071	0	666048	Trabd2b
1	87502600	87523100	20500	13605.7	1072	0	53972	Ngef
8	84547400	84571500	24100	13569.6	1073	0	12286	Cacna1a
11	16255500	16262050	6550	13560.4	1074	0	211739	Vstm2a
11	22852200	22879250	27050	13551.2	1075	0	53625	B3gnt2
18	15058800	15070550	11750	13550.8	1076	0	106931	Kctd1
5	22739000	22752100	13100	13534.6	1077	0	330052	A930003O13Rik
2	114004200	114029300	25100	13527.9	1078	0	320846	A530058N18Rik
2	29840550	29852400	11850	13509.3	1079	0	723904	Mir219a-2
7	115250600	115294400	43800	13503.7	1080	0	20679	Sox6
6	91778300	91820450	42150	13500.4	1081	0	243547	Grip2
6	77242100	77250850	8750	13492	1082	0	74342	Lrrtm1
1	124040100	124052550	12450	13463.5	1083	0	269109	Dpp10
13	55405100	55424350	19250	13459.7	1084	0	75477	Pfn3
12	80687350	80697450	10100	13448.7	1085	0	68354	Plekhd1os
1	136251650	136265250	13600	13448.1	1086	0	383563	Gpr25
7	66421150	66433550	12400	13431.1	1087	0	56847	Aldh1a3
1	136031950	136063050	31100	13417.3	1088	0	66241	Tmem9
5	127233850	127247900	14050	13389.6	1089	0	208213	Tmem132c
17	57137150	57156250	19100	13370.7	1090	0	21948	Cd70
11	114059750	114073750	14000	13290.8	1091	0	237979	Sdk2
13	54868550	54891100	22550	13287.4	1092	0	107448	Unc5a
1	75254050	75283850	29800	13285.8	1093	0	19711	Resp18
9	23213600	23232100	18500	13271.7	1094	0	73230	Bmper
18	74952950	74965000	12050	13253.4	1095	0	16891	Lipg
7	114710100	114725650	15550	13251.2	1096	0	116903	Calcb
12	73539600	73555550	15950	13243.1	1097	0	73644	2210039B01Rik
6	53810550	53826800	16250	13243.1	1098	0	66873	Tril
5	110537150	110550450	13300	13240.1	1099	0	231605	Galnt9
9	22043750	22059250	15500	13225.1	1100	0	319601	Zfp653
X	152032200	152110100	77900	13218.9	1101	0	24061	Smc1a
15	102353050	102369800	16750	13217.4	1102	0	170574	Sp7
8	84696750	84715300	18550	13208.2	1103	0	212528	Trmt1
8	40282100	40290400	8300	13200.4	1104	0	80857	Fgf20
5	115188850	115200400	11550	13193.9	1105	0	29867	Cabp1
7	13037850	13046950	9100	13190.8	1106	0	22192	Ube2m
17	36935950	36952400	16450	13186.5	1107	0	76497	Ppp1r11
11	78915700	78935100	19400	13145	1108	0	18126	Nos2
15	79784950	79812750	27800	13135.8	1109	0	73340	Nptxr
7	24633300	24646900	13600	13114.7	1110	0	72434	Lypd3
7	143972850	143988400	15550	13098.1	1111	0	210274	Shank2
16	97756300	97770000	13700	13084.3	1112	0	72388	Ripk4
2	91913150	91929800	16650	13084.1	1113	0	228361	Ambra1
9	26728550	26743650	15100	13083.2	1114	0	76898	B3gat1
6	38631850	38651450	19600	13071.1	1115	0	74253	Klrg2
17	56744050	56779700	35650	13068.4	1116	0	224907	Dus3l
10	41057550	41088100	30550	13065.4	1117	0	140741	Gpr6
8	23151500	23171200	19700	13061.3	1118	0	74561	Nkx6-3
6	3759350	3771900	12550	13043.5	1119	0	12311	Calcr
2	179658800	179688550	29750	13042.1	1120	0	12561	Cdh4
10	44517250	44533800	16550	13026.3	1121	0	12142	Prdm1
9	43197550	43213550	16000	13026.2	1122	0	18988	Pou2f3
15	55304650	55315550	10900	13025	1123	0	12818	Col14a1
7	19298300	19320600	22300	13014.1	1124	0	14282	Fosb
9	62671900	62694250	22350	13004	1125	0	319480	Itga11
1	34744300	34756650	12350	12987.7	1126	0	226970	Arhgef4
3	26326150	26336850	10700	12985.9	1127	0	192167	Nlgn1
9	46436400	46448000	11600	12982.2	1128	0	74361	4931429L15Rik
1	131231900	131254000	22100	12971.5	1129	0	54354	Rassf5
8	111883750	111894750	11000	12963.5	1130	0	56773	Chst5
10	75312750	75327150	14400	12959.8	1131	0	11540	Adora2a
9	44028400	44052500	24100	12951.2	1132	0	21838	Thy1
13	69474450	69495350	20900	12951	1133	0	210106	Tent4a
5	92380950	92397200	16250	12946.5	1134	0	109979	Art3
10	80826000	80850950	24950	12941.9	1135	0	237403	Lingo3
6	126158100	126169400	11300	12939.2	1136	0	18205	Ntf3
10	64072600	64094000	21400	12905	1137	0	216033	Ctnna3
6	36378950	36395300	16350	12897.7	1138	0	319472	9330158H04Rik
7	139815600	139843700	28100	12890.9	1139	0	52389	Adgra1
4	127160500	127182200	21700	12886.5	1140	0	242667	Dlgap3
1	74087350	74110600	23250	12882.8	1141	0	21961	Tns1
10	122444750	122456350	11600	12858.8	1142	0	54140	Avpr1a
6	147259700	147272400	12700	12854.2	1143	0	19227	Pthlh
11	72129050	72139850	10800	12849.7	1144	0	327958	Pitpnm3
5	111407450	111432400	24950	12848.6	1145	0	433938	Mn1
1	34531900	34540400	8500	12817	1146	0	12627	Cfc1
3	45373450	45385150	11700	12785.9	1147	0	72511	2610316D01Rik
5	72488500	72506450	17950	12762.6	1148	0	53419	Corin
15	79247400	79269650	22250	12757.8	1149	0	57274	Slc16a8
11	98042250	98056950	14700	12724.7	1150	0	217154	Stac2
X	94128600	94168500	39900	12715.8	1151	0	22764	Zfx
14	65418100	65429800	11700	12692.3	1152	0	18155	Pnoc
9	45035400	45046200	10800	12689.8	1153	0	14012	Mpzl2
1	171186950	171204050	17100	12677	1154	0	66425	Pcp4l1
17	25941200	25955250	14050	12671.4	1155	0	621239	Nhlrc4
8	56616050	56626550	10500	12655.8	1156	0	50753	Fbxo8
16	35651550	35667250	15700	12653.2	1157	0	20357	Sema5b
4	103613500	103627150	13650	12646.5	1158	0	13131	Dab1
6	37293400	37303800	10400	12643.9	1159	0	320127	Dgki
11	95986300	96021500	35200	12639.7	1160	0	140486	Igf2bp1
14	66907350	66920600	13250	12631.4	1161	0	239157	Pnma2
2	160905700	160917750	12050	12624.8	1162	0	64899	Lpin3
9	99351700	99366250	14550	12590.9	1163	0	272636	Esyt3
9	21160250	21173750	13500	12587.1	1164	0	18577	Pde4a
1	165832700	165855200	22500	12585.7	1165	0	12503	Cd247
12	67218100	67229350	11250	12568.1	1166	0	320772	Mdga2
3	152660300	152677700	17400	12563.3	1167	0	99542	AI115009
3	157563900	157574500	10600	12563.2	1168	0	19218	Ptger3
3	84470550	84487400	16850	12558.1	1169	0	229474	Fhdc1
X	152297350	152353100	55750	12553.7	1170	0	72997	Kantr
14	122399850	122414800	14950	12535.8	1171	0	69634	Clybl
2	181454450	181473250	18800	12530.3	1172	0	72147	Zbtb46
16	97159900	97176200	16300	12510.5	1173	0	13508	Dscam
15	39193400	39203050	9650	12510.2	1174	0	116838	Rims2
17	25415750	25443000	27250	12505.1	1175	0	58226	Cacna1h
1	24581100	24590900	9800	12494.2	1176	0	12823	Col19a1
2	153100200	153115200	15000	12493.4	1177	0	15162	Hck
19	4979900	5005550	25650	12475.6	1178	0	225872	Npas4
4	123097750	123109900	12150	12466.5	1179	0	12164	Bmp8b
6	38345850	38359600	13750	12461.1	1180	0	78781	Zc3hav1
3	118424100	118438450	14350	12443.4	1181	0	387155	Mir137
15	101837350	101870150	32800	12438.8	1182	0	406220	Krt77
7	35573450	35589700	16250	12432.9	1183	0	245886	Ankrd27
1	93097200	93107650	10450	12415.1	1184	0	16560	Kif1a
17	28131950	28152750	20800	12401.9	1185	0	268935	Scube3
5	150948350	150962550	14200	12401.9	1186	0	16591	Kl
8	12145900	12183050	37150	12400.3	1187	0	434280	Sox1ot
2	91968700	91980650	11950	12352.8	1188	0	104418	Dgkz
1	18051700	18064350	12650	12349.9	1189	0	78081	Crisp4
15	5236250	5252150	15900	12340.5	1190	0	19219	Ptger4
3	82897750	82909700	11950	12337.3	1191	0	79235	Lrat
7	108945550	108956050	10500	12331.5	1192	0	22141	Tub
2	93948350	93962550	14200	12317.9	1193	0	69113	Alkbh3
1	132539200	132550900	11700	12316.2	1194	0	21367	Cntn2
1	176268750	176280050	11300	12288.8	1195	0	319455	Pld5
6	126727150	126749950	22800	12288.7	1196	0	16494	Kcna6
13	10354100	10365250	11150	12288.1	1197	0	12671	Chrm3
X	101378400	101388700	10300	12276.5	1198	0	14618	Gjb1
15	99663850	99682800	18950	12265.8	1199	0	11419	Asic1
8	87651200	87670900	19700	12265	1200	0	94187	Zfp423
17	14270700	14285400	14700	12254.2	1201	0	64074	Smoc2
9	47523200	47544600	21400	12249.9	1202	0	54725	Cadm1
6	100024700	100061500	36800	12249.6	1203	0	56353	Rybp
10	30839000	30851600	12600	12207.1	1204	0	15214	Hey2
17	68831000	68846700	15700	12203.4	1205	0	622645	Tmem200c
13	100548500	100560000	11500	12198.3	1206	0	18260	Ocln
3	55777200	55784750	7550	12193.3	1207	0	26422	Nbea
2	121286550	121307050	20500	12182.7	1208	0	17754	Map1a
2	32076350	32093250	16900	12161.7	1209	0	241303	Fam78a
9	89616300	89629300	13000	12152.2	1210	0	209743	Minar1
4	125723600	125739450	15850	12139.8	1211	0	14807	Grik3
7	129250700	129263500	12800	12101.9	1212	0	381925	Plpp4
15	66280500	66300150	19650	12097.3	1213	0	110862	Kcnq3
11	83415100	83436300	21200	12075.5	1214	0	276952	Rasl10b
2	168905150	168914100	8950	12074	1215	0	22722	Zfp64
9	31124700	31136950	12250	12069.3	1216	0	19143	St14
14	61266850	61279950	13100	12069.1	1217	0	24053	Sgcg
11	101769200	101794450	25250	12068.8	1218	0	18612	Etv4
13	105439050	105450850	11800	12037.3	1219	0	15550	Htr1a
12	31068450	31079650	11200	12018.6	1220	0	104943	Fam110c
8	92454500	92475600	21100	12009.6	1221	0	54352	Irx5
6	114390000	114406600	16600	11998.5	1222	0	15465	Hrh1
11	101075750	101085400	9650	11995.7	1223	0	71743	Coasy
15	100632800	100644000	11200	11987.2	1224	0	668218	Bin2
2	153016500	153038950	22450	11981.9	1225	0	228787	Xkr7
10	11073650	11089100	15450	11977.3	1226	0	14816	Grm1
2	127533450	127548150	14700	11975	1227	0	192212	Prom2
12	106167900	106187950	20050	11973.1	1228	0	22367	Vrk1
5	147396300	147403900	7600	11954.4	1229	0	14255	Flt3
19	38091400	38102700	11300	11953.3	1230	0	107221	Ffar4
8	12541250	12567100	25850	11935.7	1231	0	78634	Spaca7
6	89231650	89265000	33350	11935.6	1232	0	75131	4930512J16Rik
4	49841400	49852450	11050	11905.5	1233	0	242443	Grin3a
2	13002300	13014800	12500	11899.7	1234	0	227580	C1ql3
4	44655850	44675750	19900	11892.3	1235	0	18507	Pax5
4	124566000	124583700	17700	11892.2	1236	0	108809	4933407E24Rik
9	106142850	106151900	9050	11880.4	1237	0	235582	Glyctk
14	68114500	68131300	16800	11866.5	1238	0	18040	Nefm
13	73559900	73602900	43000	11863.6	1239	0	13162	Slc6a3
6	92241100	92254450	13350	11852.9	1240	0	22044	Trh
12	14146400	14154400	8000	11851.3	1241	0	105005	Lratd1
11	35113900	35128400	14500	11847	1242	0	20564	Slit3
14	121498750	121510000	11250	11844	1243	0	56643	Slc15a1
4	42908400	42927500	19100	11836.9	1244	0	230085	Phf24
7	4771550	4784850	13300	11811.7	1245	0	78052	Tmem190
19	41647450	41680750	33300	11807.1	1246	0	20562	Slit1
1	69100100	69113400	13300	11797.6	1247	0	13869	Erbb4
11	94872300	94888400	16100	11789	1248	0	12842	Col1a1
14	66272950	66283150	10200	11751.1	1249	0	19229	Ptk2b
12	76401200	76411300	10100	11751.1	1250	0	15512	Hspa2
4	125265500	125288150	22650	11728.1	1251	0	230738	Zc3h12a
10	79603200	79617400	14200	11706	1252	0	237397	C2cd4c
2	181299850	181318700	18850	11681.9	1253	0	20262	Stmn3
2	18602400	18613600	11200	11681	1254	0	12238	Commd3
19	19106450	19113400	6950	11670.6	1255	0	225998	Rorb
18	36059600	36078800	19200	11661.4	1256	0	100042150	Nrg2
11	100956600	100977900	21300	11657.8	1257	0	19285	Cavin1
6	100174800	100217950	43150	11656.7	1258	0	56353	Rybp
12	108686500	108706550	20050	11644.6	1259	0	70059	Degs2
6	138417150	138430250	13100	11616.9	1260	0	319702	A830011K09Rik
13	58804300	58813100	8800	11604.5	1261	0	18212	Ntrk2
4	13737050	13753600	16550	11601.1	1262	0	12395	Runx1t1
17	34252600	34265950	13350	11600.9	1263	0	14961	H2-Ab1
1	125906650	125915000	8350	11578.9	1264	0	72585	Lypd1
5	108541200	108561450	20250	11573.6	1265	0	12889	Cplx1
5	144535650	144555850	20200	11571.1	1266	0	53324	Nptx2
12	82609950	82622650	12700	11567.1	1267	0	50779	Rgs6
11	63123750	63137450	13700	11556.2	1268	0	18858	Pmp22
7	130249250	130273000	23750	11534.2	1269	0	14183	Fgfr2
6	53275000	53295150	20150	11531.8	1270	0	231991	Creb5
17	69070250	69080350	10100	11523	1271	0	13823	Epb41l3
12	61518250	61530000	11750	11520.3	1272	0	238205	Lrfn5
7	113761950	113771200	9250	11506.5	1273	0	233744	Spon1
17	25800550	25823000	22450	11505.5	1274	0	214931	Fbxl16
5	98851200	98859100	7900	11501.9	1275	0	110075	Bmp3
8	87953400	87966150	12750	11494.9	1276	0	94187	Zfp423
5	119083750	119099000	15250	11492.6	1277	0	73477	1700081H04Rik
12	51587950	51597450	9500	11468.9	1278	0	12810	Coch
X	73630450	73644500	14050	11464.7	1279	0	75590	Dusp9
17	25566200	25582650	16450	11440	1280	0	76483	Lmf1
10	115582700	115596400	13700	11417.5	1281	0	14160	Lgr5
11	61368700	61388950	20250	11414.2	1282	0	67473	Slc47a1
7	137246300	137273750	27450	11395.7	1283	0	13593	Ebf3
14	23996800	24008900	12100	11381.9	1284	0	78019	4930519K11Rik
15	75557400	75573200	15800	11381.8	1285	0	23934	Ly6h
14	70550750	70562350	11600	11379.5	1286	0	15460	Hr
2	168836300	168849800	13500	11375.9	1287	0	22722	Zfp64
4	33918200	33932600	14400	11367.1	1288	0	12801	Cnr1
7	93075550	93088500	12950	11365.7	1289	0	100040298	Gm15501
3	157520150	157536350	16200	11363.4	1290	0	53861	Zranb2
16	31927800	31939350	11550	11358.9	1291	0	239827	Pigz
2	151838900	151855750	16850	11354.1	1292	0	228770	Rspo4
4	155646850	155659850	13000	11345	1293	0	76580	Mib2
18	77178500	77189500	11000	11332.1	1294	0	225742	St8sia5
11	81955500	81985250	29750	11321.9	1295	0	11418	Asic2
9	47388250	47415750	27500	11318.9	1296	0	54725	Cadm1
15	100723300	100734850	11550	11311.6	1297	0	619313	I730030J21Rik
17	37193050	37207650	14600	11305.5	1298	0	258219	Or2i1
2	158662800	158676400	13600	11304.9	1299	0	228852	Ppp1r16b
4	46530800	46541700	10900	11303.8	1300	0	74735	Trim14
10	79700550	79726800	26250	11295	1301	0	15166	Hcn2
5	38304900	38326550	21650	11281.4	1302	0	13492	Drd5
6	99877850	99915650	37800	11275.7	1303	0	50501	Prok2
14	24902900	24928300	25400	11242	1304	0	102634576	Gm32123
5	122042100	122056250	14150	11241.8	1305	0	13048	Cux2
2	102653800	102664500	10700	11238.3	1306	0	20511	Slc1a2
3	68866100	68876800	10700	11215.7	1307	0	68725	1110032F04Rik
8	11305900	11332350	26450	11211.1	1308	0	12827	Col4a2
17	69961950	69983450	21500	11186.2	1309	0	224997	Dlgap1
9	86874300	86885850	11550	11159.9	1310	0	20616	Snap91
14	8307750	8324650	16900	11158	1311	0	268709	Fam107a
6	116454900	116473700	18800	11154.7	1312	0	11689	Alox5
15	82944600	82963500	18900	11152.5	1313	0	21411	Tcf20
8	71552300	71571600	19300	11146.1	1314	0	434325	Tmem221
6	114122000	114141900	19900	11128.4	1315	0	243616	Slc6a11
4	46037100	46049250	12150	11122.3	1316	0	21916	Tmod1
10	29530800	29543550	12750	11109.6	1317	0	72780	Rspo3
12	11142800	11159100	16300	11104.9	1318	0	238076	Kcns3
2	93168350	93190650	22300	11104.5	1319	0	277414	Trp53i11
12	17320300	17333800	13500	11085.4	1320	0	68775	Atp6v1c2
14	55505550	55528700	23150	11077.3	1321	0	268747	Carmil3
9	65152600	65166850	14250	11066.7	1322	0	19289	Igdcc3
14	57052150	57062500	10350	11057.7	1323	0	14611	Gja3
13	72810250	72820950	10700	11054.2	1324	0	78446	D730050B12Rik
11	76994600	77006150	11550	11051.3	1325	0	15567	Slc6a4
1	180479250	180490550	11300	11041.6	1326	0	381310	Stum
13	94052300	94080850	28550	11040.1	1327	0	218454	Lhfpl2
11	72260850	72273950	13100	11039.2	1328	0	73366	1700051A21Rik
12	33920000	33934350	14350	11035.7	1329	0	114712	Ferd3l
9	32601550	32639500	37950	11035.7	1330	0	23871	Ets1
7	138392300	138409450	17150	11031.1	1331	0	70571	Tcerg1l
4	138540150	138562350	22200	11005.8	1332	0	75718	Vwa5b1
15	43167150	43178050	10900	10975.7	1333	0	239405	Rspo2
4	137039550	137068350	28800	10973.7	1334	0	230848	Zbtb40
3	94394700	94408850	14150	10960.5	1335	0	320747	Lingo4
18	31924150	31937000	12850	10906.5	1336	0	225341	Lims2
13	114452500	114466800	14300	10902.6	1337	0	14313	Fst
7	109776800	109791150	14350	10902.4	1338	0	78593	Nrip3
7	49230000	49253450	23450	10900.5	1339	0	78286	Nav2
7	16942550	16952500	9950	10892.6	1340	0	434128	Pnma8b
2	90882700	90891600	8900	10878.9	1341	0	67445	C1qtnf4
X	99544350	99587950	43600	10878.8	1342	0	18744	Pja1
19	41191000	41212350	21350	10878.5	1343	0	24087	Tll2
6	119100550	119116250	15700	10864.8	1344	0	12288	Cacna1c
17	35417650	35427400	9750	10863.6	1345	0	15019	H2-Q8
9	44278550	44291650	13100	10855.7	1346	0	192663	Abcg4
5	121921250	121940100	18850	10855.7	1347	0	13048	Cux2
9	42927350	42950150	22800	10826.4	1348	0	110637	Grik4
13	76051550	76060200	8650	10818.8	1349	0	238725	Gpr150
7	81206550	81221950	15400	10804.9	1350	0	18584	Pde8a
7	112952400	112959850	7450	10797.9	1351	0	78748	Rassf10
11	84688800	84717950	29150	10792.5	1352	0	78471	1700109G15Rik
18	66282250	66296050	13800	10781.9	1353	0	320924	Ccbe1
17	69434850	69445550	10700	10774	1354	0	320722	Akain1
4	102083900	102091550	7650	10749.5	1355	0	18578	Pde4b
8	119447050	119454000	6950	10725.6	1356	0	117148	Necab2
1	14498150	14512250	14100	10714.6	1357	0	14048	Eya1
2	49779250	49792000	12750	10711.7	1358	0	71897	Lypd6b
4	107591800	107634100	42300	10707.9	1359	0	230587	Glis1
6	22285400	22293300	7900	10704.1	1360	0	93735	Wnt16
2	30833650	30856900	23250	10692.2	1361	0	20204	Prrx2
11	52871900	52906150	34250	10679	1362	0	320027	Fstl4
1	87122350	87130400	8050	10661.8	1363	0	11648	Akp3
11	113614950	113626200	11250	10652.6	1364	0	69806	Slc39a11
15	48783800	48795500	11700	10637.6	1365	0	239420	Csmd3
X	103788100	103829350	41250	10630.7	1366	0	20502	Slc16a2
4	125896050	125926650	30600	10629.5	1367	0	72395	2610028E06Rik
1	180885350	180901350	16000	10629.5	1368	0	320202	Lefty2
9	21954900	21968700	13800	10624.1	1369	0	66962	Swsap1
8	84008100	84016750	8650	10620.3	1370	0	70134	Misp3
14	57129100	57141800	12700	10588.7	1371	0	14623	Gjb6
18	74058250	74069400	11150	10587.6	1372	0	225724	Mapk4
5	110470150	110505950	35800	10585.8	1373	0	231603	A630023P12Rik
8	120245900	120301700	55800	10561.2	1374	0	382034	Gse1
12	81324100	81341250	17150	10553.1	1375	0	110893	Slc8a3
6	110640850	110649050	8200	10522.5	1376	0	108073	Grm7
8	102780500	102791300	10800	10514.2	1377	0	12552	Cdh11
10	127718750	127738650	19900	10509.5	1378	0	432516	Myo1a
11	89292300	89311600	19300	10496.1	1379	0	18121	Nog
11	94925000	94952400	27400	10477.8	1380	0	12842	Col1a1
2	82048200	82057100	8900	10453.8	1381	0	241514	Zfp804a
15	101430500	101444700	14200	10452.9	1382	0	406219	Krt87
12	78902200	78914750	12550	10408.6	1383	0	27260	Plek2
19	5443350	5452200	8850	10407.8	1384	0	14283	Fosl1
8	119696550	119709450	12900	10403	1385	0	69047	Atp2c2
3	152976700	152987950	11250	10361.5	1386	0	329777	Pigk
9	37131400	37147350	15950	10360.4	1387	0	208076	Pknox2
4	148856350	148866850	10500	10359.8	1388	0	69743	Casz1
12	37105650	37112800	7150	10357.2	1389	0	17286	Meox2
8	106862250	106876300	14050	10354.9	1390	0	15118	Has3
8	29213850	29226800	12950	10338.8	1391	0	210801	Unc5d
15	85726150	85738250	12100	10328.6	1392	0	19013	Ppara
14	115087450	115098300	10850	10314.7	1393	0	103978	Gpc5
14	63487100	63514450	27350	10311.1	1394	0	58865	Tdh
6	29428600	29441000	12400	10302.5	1395	0	68794	Flnc
10	88880350	88894250	13900	10299.3	1396	0	216225	Slc5a8
16	5876050	5899700	23650	10294.3	1397	0	268859	Rbfox1
17	25250000	25260650	10650	10282.8	1398	0	545192	Baiap3
14	72525750	72536400	10650	10280.2	1399	0	319448	Fndc3a
11	115148400	115170050	21650	10277.1	1400	0	58222	Rab37
1	78304700	78315600	10900	10272.2	1401	0	433323	Sgpp2
7	118487600	118496750	9150	10269.5	1402	0	319622	Itpripl2
5	47981600	47989750	8150	10265.9	1403	0	20563	Slit2
11	75791050	75802250	11200	10255.7	1404	0	13447	Doc2b
19	42372650	42392050	19400	10255	1405	0	72832	Crtac1
7	109005050	109018900	13850	10220.6	1406	0	22141	Tub
6	54321450	54338150	16700	10210.6	1407	0	78004	Prr15
17	80940500	80952250	11750	10202.4	1408	0	68027	Tmem178
8	122738600	122757700	19100	10174.8	1409	0	108148	Galnt2
6	48735350	48748700	13350	10168	1410	0	317757	Gimap5
11	47979400	47995500	16100	10157.4	1411	0	24052	Sgcd
8	122212900	122236650	23750	10155.1	1412	0	108148	Galnt2
16	28439600	28453250	13650	10149.5	1413	0	14167	Fgf12
13	109996100	110023450	27350	10140.9	1414	0	67295	Rab3c
2	35573050	35594000	20950	10122.6	1415	0	69601	Dab2ip
2	127831500	127846000	14500	10114.8	1416	0	74121	Acoxl
5	30453800	30478300	24500	10110.1	1417	0	83762	Otof
10	89339150	89348100	8950	10097.9	1418	0	320091	Ano4
3	5206900	5217400	10500	10096.4	1419	0	72608	2700069I18Rik
19	38477150	38489400	12250	10093.4	1420	0	74055	Plce1
10	60792750	60818200	25450	10085	1421	0	107449	Unc5b
19	58909250	58937150	27900	10072.7	1422	0	73442	Hspa12a
13	53274050	53294650	20600	10061.8	1423	0	26564	Ror2
1	173363650	173372800	9150	10052.6	1424	0	94332	Cadm3
18	77789350	77801500	12150	10052.6	1425	0	619308	F830208F22Rik
10	117626650	117636550	9900	10040.3	1426	0	70574	Cpm
6	122480150	122503100	22950	10034.1	1427	0	108653	Rimklb
15	34827500	34845200	17700	10029.5	1428	0	16539	Kcns2
1	86015150	86028450	13300	10023.7	1429	0	70060	Spata3
5	146578450	146595650	17200	10020.3	1430	0	14738	Gpr12
8	25096650	25111100	14450	10015.7	1431	0	83436	Plekha2
8	104163800	104175000	11200	10013.9	1432	0	65115	Bean1
18	81157350	81169850	12500	10011.1	1433	0	20689	Sall3
7	45355350	45374800	19450	10001.8	1434	0	76787	Ppfia3
3	96463500	96480500	17000	9991.24	1435	0	329716	BC107364
18	63382300	63391650	9350	9987.99	1436	0	667742	Piezo2
9	20848500	20880550	32050	9983	1437	0	70726	Angptl6
1	152949300	152962650	13350	9978.76	1438	0	226518	Nmnat2
13	34644950	34658450	13500	9973.31	1439	0	66895	Pxdc1
6	97056300	97064950	8650	9971.74	1440	0	320701	Tafa4
3	108215800	108228800	13000	9971.49	1441	0	17306	Sypl2
3	141460750	141471150	10400	9969.53	1442	0	22253	Unc5c
12	105330500	105345500	15000	9949.2	1443	0	69952	Tunar
6	100115200	100149750	34550	9937.12	1444	0	56353	Rybp
3	92076400	92087500	11100	9923.23	1445	0	16939	Lor
13	70836600	70849500	12900	9914.14	1446	0	271127	Adamts16
4	41661850	41683700	21850	9905.88	1447	0	12804	Cntfr
4	139750200	139774600	24400	9904.84	1448	0	18509	Pax7
1	5913650	5920400	6750	9867.96	1449	0	226304	Npbwr1
3	36518450	36527500	9050	9842.6	1450	0	100503068	Smim43
1	189781950	189807700	25750	9839.88	1451	0	19250	Ptpn14
4	117919700	117931900	12200	9837.99	1452	0	11876	Artn
6	103505550	103516600	11050	9835.68	1453	0	12661	Chl1
11	116104850	116115050	10200	9828.03	1454	0	217333	Trim47
5	129579900	129593400	13500	9826.45	1455	0	23948	Mmp17
9	121763600	121790100	26500	9819.52	1456	0	74770	Hhatl
5	35460350	35491100	30750	9818.8	1457	0	242939	Cpz
18	35959600	35981300	21700	9818.66	1458	0	74002	Psd2
7	25310900	25318950	8050	9812.6	1459	0	330485	Tmem145
6	105672700	105683950	11250	9811.61	1460	0	269784	Cntn4
10	80006100	80026600	20500	9810.52	1461	0	70719	Arhgap45
11	113188200	113212950	24750	9793.61	1462	0	72386	2610035D17Rik
11	116915050	116926650	11600	9782.58	1463	0	268510	Mgat5b
18	86390600	86399400	8800	9746.32	1464	0	246317	Neto1
13	103324750	103339300	14550	9742.59	1465	0	328329	Mast4
6	42312650	42326400	13750	9738.75	1466	0	76156	Fam131b
1	185448350	185461250	12900	9724.13	1467	0	226781	Slc30a10
7	84079200	84092350	13150	9719.26	1468	0	80982	Cemip
6	85477300	85490750	13450	9709.8	1469	0	330369	Fbxo41
3	132080000	132089700	9700	9708.38	1470	0	56811	Dkk2
4	106451850	106465800	13950	9707.72	1471	0	100102	Pcsk9
1	154872200	154891400	19200	9704.7	1472	0	12290	Cacna1e
15	98672200	98680500	8300	9691.65	1473	0	223881	Rnd1
15	102001800	102013800	12000	9685.52	1474	0	16691	Krt8
13	96919650	96934550	14900	9667.51	1475	0	218476	Gcnt4
3	31299450	31315700	16250	9665.65	1476	0	241919	Slc7a14
15	75881600	75898700	17100	9664.9	1477	0	66656	Eef1d
8	92054950	92085250	30300	9664.43	1478	0	71296	Crnde
10	93828450	93837750	9300	9660.61	1479	0	327799	Usp44
7	136479200	136499850	20650	9642.73	1480	0	330664	C230079O03Rik
18	64261750	64268000	6250	9637.21	1481	0	73588	St8sia3os
19	37873250	37890100	16850	9632.59	1482	0	102465114	Mir3084-2
10	81331500	81348750	17250	9629.81	1483	0	21390	Tbxa2r
11	69231650	69241800	10150	9621.74	1484	0	14919	Gucy2e
8	118276950	118292100	15150	9606.59	1485	0	12554	Cdh13
5	33086700	33109200	22500	9605.42	1486	0	20537	Slc5a1
7	65143850	65161050	17200	9604.9	1487	0	70638	Entrep2
2	132873600	132882350	8750	9586.44	1488	0	320974	Lrrn4
7	29167000	29178100	11100	9580.46	1489	0	57296	Psmd8
5	35750150	35767950	17800	9558.54	1490	0	231148	Ablim2
7	49748900	49773050	24150	9557.51	1491	0	53415	Htatip2
19	10377000	10395950	18950	9546.32	1492	0	54525	Syt7
9	51757550	51769950	12400	9543.45	1493	0	244867	Arhgap20
17	71304100	71314750	10650	9540.28	1494	0	246707	Emilin2
9	95399600	95414050	14450	9539.58	1495	0	54371	Chst2
10	43166900	43181050	14150	9535.02	1496	0	74530	9030612E09Rik
10	75554700	75567100	12400	9521.82	1497	0	192734	Lrrc75b
17	8337600	8348450	10850	9521.58	1498	0	320111	Prr18
4	120026050	120041450	15400	9513.71	1499	0	16656	Hivep3
11	79585400	79599850	14450	9510.86	1500	0	268451	Rab11fip4
2	25173450	25188600	15150	9498.72	1501	0	67122	Nrarp
11	96450200	96470050	19850	9497.86	1502	0	78473	Skap1
X	98145450	98156500	11050	9489.51	1503	0	11835	Ar
5	27037300	27056350	19050	9480.28	1504	0	13483	Dpp6
17	83534750	83550600	15850	9479.2	1505	0	20463	Cox7a2l
4	132139600	132152600	13000	9474.07	1506	0	18386	Oprd1
6	113742700	113774800	32100	9471.05	1507	0	11941	Atp2b2
18	76052250	76068100	15850	9469.39	1508	0	207259	Zbtb7c
4	45747850	45773400	25550	9465.15	1509	0	100040567	Gm12409
7	19273050	19285650	12600	9464.59	1510	0	232941	Ppm1n
8	106503550	106518050	14500	9449.76	1511	0	12560	Cdh3
10	94938550	94950250	11700	9433.23	1512	0	54712	Plxnc1
17	47901150	47928050	26900	9430.15	1513	0	74123	Foxp4
4	156254250	156256050	1800	9392.89	1514	0	231004	Samd11
17	24683050	24694000	10950	9392.75	1515	0	20974	Syngr3
6	143846850	143869500	22650	9387.3	1516	0	20678	Sox5
15	95522700	95533350	10650	9366.79	1517	0	54003	Nell2
7	105421050	105436850	15800	9366.14	1518	0	12426	Cckbr
4	34882650	34902350	19700	9365.77	1519	0	30046	Zfp292
17	46294050	46304750	10700	9346.97	1520	0	224814	Abcc10
6	91968850	91985050	16200	9346.43	1521	0	232237	Fgd5
1	93163450	93196650	33200	9343.27	1522	0	381284	Crocc2
4	148217050	148247750	30700	9341.82	1523	0	242748	Disp3
11	43764150	43778000	13850	9338	1524	0	11548	Adra1b
18	36717550	36731350	13800	9337	1525	0	12475	Cd14
9	27288950	27306200	17250	9331.52	1526	0	235086	Igsf9b
17	34125350	34153900	28550	9330.21	1527	0	15000	H2-DMb2
9	123460950	123462750	1800	9327.27	1528	0	102436	Lars2
1	121522650	121536500	13850	9312.67	1529	0	15564	Htr5b
2	180446050	180464850	18800	9292.68	1530	0	108115	Slco4a1
6	99686750	99699900	13150	9275.56	1531	0	14761	Gpr27
1	64729250	64740600	11350	9273.59	1532	0	14367	Fzd5
4	135681100	135692100	11000	9258.58	1533	0	242700	Ifnlr1
9	61153800	61178400	24600	9254.12	1534	0	619328	I730028E13Rik
15	13164500	13181250	16750	9252.99	1535	0	12563	Cdh6
2	165590450	165603250	12800	9249.51	1536	0	14049	Eya2
14	55108200	55121000	12800	9236.2	1537	0	319984	Jph4
2	80442200	80451350	9150	9235.66	1538	0	20378	Frzb
7	129764000	129799150	35150	9220.04	1539	0	207425	Wdr11
7	107202650	107216350	13700	9217.2	1540	0	76572	Rbmxl2
1	34668500	34682000	13500	9212.58	1541	0	226970	Arhgef4
5	136491450	136517200	25750	9207.97	1542	0	13047	Cux1
5	113535950	113561650	25700	9207.67	1543	0	320916	Wscd2
4	133597750	133607000	9250	9197.58	1544	0	55948	Sfn
11	70315100	70332500	17400	9194.12	1545	0	11685	Alox12e
14	70172750	70184700	11950	9183.95	1546	0	213019	Pdlim2
6	113278900	113288750	9850	9171.04	1547	0	97287	Mtmr14
7	19174450	19185050	10600	9161.77	1548	0	724063	Mir330
13	63565900	63579050	13150	9161.56	1549	0	19206	Ptch1
12	75171050	75182450	11400	9157.54	1550	0	238271	Kcnh5
4	120641850	120653250	11400	9147.71	1551	0	56222	Cited4
6	121206600	121223750	17150	9134.12	1552	0	53857	Tuba8
8	12095800	12114850	19050	9120.27	1553	0	75528	Tex29
7	19462250	19474150	11900	9115.25	1554	0	74463	Exoc3l2
8	120727100	120744800	17700	9114.46	1555	0	15900	Irf8
13	42296050	42307850	11800	9092.2	1556	0	13614	Edn1
2	156414950	156431550	16600	9087.87	1557	0	13821	Epb41l1
15	74658250	74681500	23250	9087.19	1558	0	11838	Arc
16	96272300	96284500	12200	9084.93	1559	0	93961	B3galt5
7	81853400	81870650	17250	9077.3	1560	0	107769	Tm6sf1
16	30273900	30289500	15600	9076.17	1561	0	74488	Lrrc15
13	54047050	54060050	13000	9063.45	1562	0	13488	Drd1
6	14892750	14905000	12250	9062.76	1563	0	114142	Foxp2
8	34793750	34813300	19550	9043.42	1564	0	319520	Dusp4
11	35446450	35474600	28150	9035.65	1565	0	20564	Slit3
8	122282350	122304200	21850	9027.96	1566	0	22761	Zfpm1
5	140594900	140613850	18950	9027.96	1567	0	16848	Lfng
5	119744500	119754350	9850	9023.08	1568	0	433944	Tbx3os2
17	30896700	30910650	13950	9009.36	1569	0	224671	Btbd9
1	119047150	119064750	17600	9003.01	1570	0	14633	Gli2
6	99719900	99732150	12250	8994.52	1571	0	50501	Prok2
2	113212450	113220900	8450	8994.36	1572	0	20192	Ryr3
8	80050650	80063600	12950	8986.42	1573	0	15245	Hhip
11	6582850	6609000	26150	8984.84	1574	0	216527	Ccm2
17	48922200	48935700	13500	8977.19	1575	0	70530	Lrfn2
X	146958250	146969350	11100	8967.51	1576	0	15560	Htr2c
2	128119700	128128550	8850	8966.7	1577	0	74121	Acoxl
6	85403550	85412150	8600	8952.51	1578	0	384452	Noto
16	93677250	93686450	9200	8949.17	1579	0	109857	Cbr3
6	144201300	144213200	11900	8944.88	1580	0	20678	Sox5
19	37230500	37241050	10550	8943.52	1581	0	102465114	Mir3084-2
1	132287150	132310150	23000	8940.82	1582	0	213417	Klhdc8a
15	78098700	78128450	29750	8919.15	1583	0	12300	Cacng2
3	97883000	97894900	11900	8917.19	1584	0	83679	Pde4dip
4	154164500	154181650	17150	8916.68	1585	0	59002	Wrap73
6	115984400	116000550	16150	8891.71	1586	0	67784	Plxnd1
18	65868150	65878050	9900	8888.46	1587	0	225642	Grp
3	87943450	87962500	19050	8877.1	1588	0	12904	Crabp2
8	123401200	123415950	14750	8872.63	1589	0	66855	Tcf25
5	141236250	141249500	13250	8859.68	1590	0	330222	Sdk1
12	54056950	54069750	12800	8852.39	1591	0	27386	Npas3
12	70340100	70351550	11450	8841.56	1592	0	94090	Trim9
15	89495850	89506800	10950	8834.11	1593	0	58234	Shank3
10	80926450	80951750	25300	8821.58	1594	0	17873	Gadd45b
10	24217450	24231150	13700	8817.55	1595	0	59012	Moxd1
7	84525900	84542150	16250	8805.53	1596	0	100039239	Ctxnd1
9	81626850	81640450	13600	8797.19	1597	0	319405	D430036J16Rik
8	88509850	88524050	14200	8796.26	1598	0	93960	Nkd1
4	129101550	129110000	8450	8795.41	1599	0	66260	Tmem54
2	103964200	103974250	10050	8789.57	1600	0	70986	4931422A03Rik
15	82060650	82074500	13850	8788.35	1601	0	74369	Mei1
11	96532600	96563500	30900	8783.34	1602	0	78473	Skap1
11	31359700	31375100	15400	8782.99	1603	0	20856	Stc2
4	89684550	89692750	8200	8774.62	1604	0	242523	Dmrta1
4	44501550	44525150	23600	8774.11	1605	0	18507	Pax5
2	164990450	165003500	13050	8773.76	1606	0	57138	Slc12a5
11	3994450	4002350	7900	8764.88	1607	0	53897	Gal3st1
7	35115200	35125450	10250	8755.65	1608	0	12606	Cebpa
19	24551250	24559550	8300	8753.98	1609	0	18719	Pip5k1b
4	137670800	137688750	17950	8752.99	1610	0	110351	Rap1gap
16	91166000	91185750	19750	8751.03	1611	0	50913	Olig2
8	124743250	124757500	14250	8745.51	1612	0	69627	Fam89a
6	115357800	115364300	6500	8741.33	1613	0	19016	Pparg
6	92936150	92950350	14200	8740.88	1614	0	330385	9530026P05Rik
16	10299250	10322350	23100	8731.18	1615	0	13731	Emp2
4	126637500	126673200	35700	8727.17	1616	0	26445	Psmb2
8	71504200	71513450	9250	8723.96	1617	0	84094	Plvap
1	146491800	146500000	8200	8714.11	1618	0	215378	Brinp3
17	83198450	83220250	21800	8699.56	1619	0	106522	Pkdcc
12	81623000	81636500	13500	8695.64	1620	0	69480	Ttc9
19	5738300	5762150	23850	8692.41	1621	0	78891	Scyl1
3	53651800	53659700	7900	8688.88	1622	0	242022	Frem2
2	118358850	118377750	18900	8686.41	1623	0	381413	Gpr176
18	38011500	38032000	20500	8685.72	1624	0	106952	Arap3
7	3299400	3311550	12150	8679.11	1625	0	50918	Myadm
3	96593000	96605900	12900	8675.36	1626	0	69870	Polr3gl
8	84906250	84922400	16150	8663.57	1627	0	56527	Mast1
4	9007400	9033550	26150	8663.33	1628	0	320790	Chd7
13	99893250	99901750	8500	8663.33	1629	0	27220	Cartpt
19	43541650	43556600	14950	8660.62	1630	0	102465114	Mir3084-2
2	152618550	152633150	14600	8654.1	1631	0	654459	Defb25
9	49332000	49346500	14500	8647.18	1632	0	13489	Drd2
8	50912300	50921750	9450	8640.23	1633	0	100039954	Gm2516
13	113027200	113040700	13500	8638.25	1634	0	735309	Mir449c
17	73704250	73717550	13300	8634.53	1635	0	71685	Galnt14
1	172555650	172577100	21450	8633.17	1636	0	240916	Vsig8
15	97751700	97776000	24300	8620.92	1637	0	223864	Rapgef3
1	38623100	38637500	14400	8610.26	1638	0	16764	Aff3
3	141924900	141946500	21600	8602.27	1639	0	12167	Bmpr1b
6	148437300	148450650	13350	8594.21	1640	0	387314	Tmtc1
X	155619950	155629000	9050	8594.1	1641	0	211612	Ptchd1
13	54788150	54813000	24850	8586.3	1642	0	74257	Tspan17
2	160572700	160589400	16700	8584.87	1643	0	21969	Top1
7	19054500	19067900	13400	8578.65	1644	0	83434	Rsph6a
3	158554900	158565600	10700	8576.26	1645	0	242274	Lrrc7
3	83758950	83774050	15100	8564.27	1646	0	20319	Sfrp2
15	98627400	98643150	15750	8545.45	1647	0	12297	Cacnb3
2	73958850	73982250	23400	8545.1	1648	0	228033	Atp5mc3
18	76373700	76408800	35100	8544.92	1649	0	17126	Smad2
6	128295800	128307600	11800	8543.33	1650	0	21679	Tead4
9	23001650	23013450	11800	8539.54	1651	0	319845	Bbs9
19	43435700	43444650	8950	8539.36	1652	0	83674	Cnnm1
19	45532150	45554250	22100	8537.98	1653	0	56626	Poll
12	103228100	103252550	24450	8537.46	1654	0	170952	Prima1
11	43822750	43845100	22350	8534.1	1655	0	11548	Adra1b
17	24195750	24216000	20250	8531.58	1656	0	72016	Tedc2
16	18120950	18137550	16600	8529.48	1657	0	65079	Rtn4r
16	90823550	90838950	15400	8528.92	1658	0	70967	Eva1c
12	113137250	113160150	22900	8517.4	1659	0	68337	Crip2
9	58483500	58494150	10650	8494.35	1660	0	319477	Insyn1
11	77459050	77471600	12550	8492.56	1661	0	268445	Ankrd13b
7	131871250	131894250	23000	8491.37	1662	0	14183	Fgfr2
9	22094350	22105250	10900	8490.09	1663	0	12797	Cnn1
2	132376850	132390850	14000	8488.93	1664	0	246313	Prokr2
19	28673550	28687450	13900	8486.91	1665	0	320176	D930032P07Rik
9	97007050	97022200	15150	8478.06	1666	0	211949	Spsb4
5	101760150	101777850	17700	8477.08	1667	0	74596	Cds1
15	78665000	78689550	24550	8475.78	1668	0	207393	Elfn2
4	98813600	98825400	11800	8474.1	1669	0	545660	I0C0044D17Rik
17	8514800	8531150	16350	8474.1	1670	0	23984	Pde10a
4	124469350	124488850	19500	8469.48	1671	0	78460	1700057H15Rik
5	143153450	143169700	16250	8464.6	1672	0	100042605	Rbakdn
2	165174350	165187000	12650	8462.12	1673	0	104010	Cdh22
3	95158300	95176050	17750	8459.63	1674	0	20360	Sema6c
12	101009350	101031200	21850	8454.29	1675	0	68339	Ccdc88c
16	21229350	21254050	24700	8444.07	1676	0	328646	Gm16863
17	87739650	87750000	10350	8436.21	1677	0	210741	Kcnk12
2	5130800	5143750	12950	8436.03	1678	0	74186	Ccdc3
4	82530050	82545450	15400	8433.95	1679	0	18028	Nfib
13	23281950	23291450	9500	8433.02	1680	0	75322	4930557F10Rik
8	11713700	11728000	14300	8429.85	1681	0	54126	Arhgef7
1	72527250	72540350	13100	8425.02	1682	0	381270	Marchf4
3	13467850	13477500	9650	8418.42	1683	0	76897	Ralyl
1	39190750	39204250	13500	8415.38	1684	0	18143	Npas2
2	164850200	164860550	10350	8386.17	1685	0	18830	Pltp
3	117570500	117580300	9800	8381.79	1686	0	75769	Plppr5
4	154852300	154872650	20350	8381.67	1687	0	27390	Mmel1
2	178114450	178127600	13150	8381.52	1688	0	74189	Phactr3
19	3406750	3418100	11350	8380.82	1689	0	17771	Tesmin
16	23887600	23902250	14650	8372.37	1690	0	20604	Sst
12	72055100	72073900	18800	8368.28	1691	0	67217	L3hypdh
4	131237000	131269200	32200	8363.43	1692	0	77835	A930031H19Rik
17	34958650	34970650	12000	8363.08	1693	0	193740	Hspa1a
12	81017950	81033150	15200	8361.03	1694	0	64075	Smoc1
6	136166550	136177000	10450	8353.15	1695	0	14812	Grin2b
5	136879000	136885900	6900	8349.48	1696	0	140709	Col26a1
6	85121750	85130050	8300	8346.8	1697	0	20751	Spr
15	92392850	92399950	7100	8343.33	1698	0	239618	Pdzrn4
11	95185500	95207450	21950	8343.06	1699	0	320453	Dlx4os
7	101449400	101467900	18500	8340.25	1700	0	207728	Pde2a
1	104764350	104772950	8600	8338.28	1701	0	23836	Cdh20
11	80148850	80159850	11000	8329.89	1702	0	216991	Adap2
9	65623050	65634450	11400	8327.32	1703	0	71973	Rbpms2
18	59168750	59180250	11500	8323.16	1704	0	78923	Chsy3
3	89503600	89527150	23550	8316.72	1705	0	140493	Kcnn3
19	4202900	4223750	20850	8316.41	1706	0	56708	Clcf1
2	150516350	150531700	15350	8311.86	1707	0	545471	Zfp345
17	36985950	36993050	7100	8308.52	1708	0	240095	H2-M5
13	109110650	109120500	9850	8303.32	1709	0	238871	Pde4d
18	24649100	24657900	8800	8297.4	1710	0	68591	Mocos
6	86187800	86201900	14100	8295.57	1711	0	21802	Tgfa
5	37708700	37723350	14650	8294.51	1712	0	64293	Stk32b
5	35665500	35683300	17800	8290.19	1713	0	78558	Htra3
7	121860250	121869400	9150	8271.02	1714	0	20277	Scnn1b
11	100352150	100361250	9100	8270.37	1715	0	15114	Hap1
4	108207950	108222350	14400	8266.4	1716	0	230590	Zyg11a
3	54911100	54919750	8650	8261.78	1717	0	329641	Sertm1
14	69983450	70009900	26450	8261.78	1718	0	73523	Pebp4
X	110808950	110819650	10700	8261.77	1719	0	18994	Pou3f4
18	81908200	81928550	20350	8260.87	1720	0	100628596	Mir5127
7	28627150	28638750	11600	8260.08	1721	0	101744	Acp7
18	80288600	80301100	12500	8258.95	1722	0	66943	Slc66a2
8	119621700	119638650	16950	8251.46	1723	0	66733	Kcng4
12	24672950	24685750	12800	8247.94	1724	0	12879	Cys1
10	45468400	45477450	9050	8243.32	1725	0	380669	Lin28b
7	126846000	126854200	8200	8228.99	1726	0	233875	Ino80e
4	151263150	151308900	45750	8224.53	1727	0	100072	Camta1
7	24604200	24615550	11350	8223.69	1728	0	66071	Ethe1
7	73366900	73384150	17250	8206.95	1729	0	319783	A730056A06Rik
3	142162800	142181250	18450	8206.4	1730	0	12167	Bmpr1b
16	34796150	34822850	26700	8206.4	1731	0	107589	Mylk
12	16641350	16664950	23600	8202.69	1732	0	18217	Ntsr2
18	38594000	38606850	12850	8197.66	1733	0	24066	Spry4
19	10283550	10314350	30800	8196.43	1734	0	269060	Dagla
3	146210450	146233500	23050	8187.94	1735	0	65086	Lpar3
2	180408250	180432700	24450	8178.56	1736	0	723954	Mir133a-2
5	120998450	121022050	23600	8177.24	1737	0	19894	Rph3a
2	92585900	92610150	24250	8169.16	1738	0	76969	Chst1
13	49139500	49152200	12700	8164.86	1739	0	75607	Wnk2
14	63729250	63747900	18650	8157.94	1740	0	219149	Xkr6
7	25362800	25374900	12100	8149.75	1741	0	72383	Cnfn
10	60103500	60112000	8500	8141.78	1742	0	94214	Spock2
6	100545400	100570550	25150	8140.03	1743	0	72171	Shq1
13	21250800	21265400	14600	8139.89	1744	0	14780	Gpx5
11	61338550	61349150	10600	8132.55	1745	0	67473	Slc47a1
6	120488200	120500050	11850	8124.69	1746	0	94047	Tmem121b
4	154748300	154778700	30400	8114.3	1747	0	242800	Ttc34
7	113199700	113212400	12700	8109.47	1748	0	11865	Bmal1
2	13789400	13798200	8800	8104.86	1749	0	241230	St8sia6
1	22527350	22538800	11450	8094.66	1750	0	116837	Rims1
9	103755900	103771000	15100	8091.73	1751	0	81907	Tmem108
17	23637050	23645650	8600	8084.83	1752	0	240047	Mmp25
7	44301800	44317650	15850	8067.85	1753	0	243961	Shank1
2	31476650	31508550	31900	8065.3	1754	0	432466	Gm5424
2	28957700	28980450	22750	8064.33	1755	0	329375	Cfap77
8	72314150	72325050	10900	8062.24	1756	0	16598	Klf2
1	167595250	167603600	8350	8058.7	1757	0	20183	Rxrg
11	80291850	80307350	15500	8053.83	1758	0	246104	Rhbdl3
7	139184500	139195050	10550	8053.05	1759	0	57740	Stk32c
6	137248250	137257150	8900	8050.06	1760	0	19277	Ptpro
14	108909000	108914650	5650	8049.47	1761	0	76965	Slitrk1
2	167235250	167244400	9150	8045.64	1762	0	19223	Ptgis
3	153969250	153977300	8050	8040.75	1763	0	242259	Slc44a5
3	30215900	30229450	13550	8039.19	1764	0	14013	Mecom
2	168042200	168053750	11550	8037.45	1765	0	58220	Pard6b
9	32401950	32416250	14300	8028.08	1766	0	56379	Kcnj1
10	7827550	7856950	29400	8026.39	1767	0	237256	Zc3h12d
17	35192200	35207350	15150	8024.09	1768	0	21926	Tnf
11	49161500	49176300	14800	8011.76	1769	0	237754	Btnl9
1	75215350	75224150	8800	8011.63	1770	0	381272	A630095N17Rik
9	79713000	79723750	10750	8007.93	1771	0	12816	Col12a1
17	7819500	7834400	14900	8003.32	1772	0	68655	Fndc1
3	121258400	121272400	14000	8003.2	1773	0	99887	Tlcd4
16	84770750	84781800	11050	7987.71	1774	0	67374	Jam2
13	53756750	53786450	29700	7982.52	1775	0	75252	4930555G21Rik
2	166420200	166447750	27550	7956.11	1776	0	319684	5031425F14Rik
18	81636050	81653200	17150	7949.73	1777	0	100628596	Mir5127
6	28442100	28457100	15000	7943.31	1778	0	18506	Pax4
8	107938900	107954500	15600	7938.7	1779	0	11906	Zfhx3
5	37085350	37102750	17400	7938.17	1780	0	76071	Jakmip1
9	47346550	47373700	27150	7934.6	1781	0	54725	Cadm1
X	133679750	133692450	12700	7933.54	1782	0	279653	Pcdh19
12	103308950	103327300	18350	7932.87	1783	0	65256	Asb2
18	24701850	24717050	15200	7924.85	1784	0	225288	Fhod3
1	33901050	33911200	10150	7920.24	1785	0	320705	Bend6
5	147949250	147965450	16200	7915.6	1786	0	77521	Mtus2
11	68944200	68960750	16550	7912.93	1787	0	442801	Arhgef15
15	83247400	83255700	8300	7909.18	1788	0	239559	A4galt
2	167298250	167334000	35750	7906.39	1789	0	56336	B4galt5
2	92911350	92922950	11600	7905.17	1790	0	80976	Syt13
2	143543550	143554050	10500	7902.4	1791	0	378776	Pcsk2os1
5	120203550	120233050	29500	7899.65	1792	0	74111	Rbm19
1	40319750	40329200	9450	7897.25	1793	0	107527	Il1rl2
11	69796100	69810650	14550	7893.79	1794	0	380705	Tmem102
8	27170750	27188900	18150	7890.23	1795	0	75767	Rab11fip1
9	54062500	54070250	7750	7889.84	1796	0	244882	Tnfaip8l3
X	36321750	36343550	21800	7878.7	1797	0	74365	Lonrf3
6	128027000	128045550	18550	7878.7	1798	0	109246	Tspan9
8	91983050	92002850	19800	7877.52	1799	0	16373	Irx3
2	77810400	77821950	11550	7869.47	1800	0	241494	Zfp385b
8	70860000	70872650	12650	7864.85	1801	0	84036	Kcnn1
7	28535400	28550250	14850	7860.23	1802	0	68416	Sycn
15	89553300	89564250	10950	7859.24	1803	0	58234	Shank3
9	42887500	42905600	18100	7857.97	1804	0	110637	Grik4
18	38059700	38091500	31800	7849.49	1805	0	106952	Arap3
1	135581050	135590000	8950	7844.08	1806	0	215714	Gm4793
10	127602850	127624800	21950	7842.78	1807	0	16971	Lrp1
17	36078000	36089800	11800	7831.88	1808	0	14963	H2-Bl
6	145861250	145867450	6200	7830.46	1809	0	79362	Bhlhe41
13	95439100	95448650	9550	7827.93	1810	0	12919	Crhbp
17	56467700	56478900	11200	7826.18	1811	0	19280	Ptprs
11	121152000	121159800	7800	7819.89	1812	0	217369	Uts2r
14	44856200	44864550	8350	7813.52	1813	0	19214	Ptgdr
4	133235400	133254850	19450	7807.05	1814	0	53608	Map3k6
5	116074550	116091150	16600	7804.01	1815	0	545798	Tmem233
9	58022950	58054000	31050	7800.42	1816	0	382077	Ccdc33
6	65667350	65677100	9750	7799.61	1817	0	68169	Ndnf
2	179428900	179448200	19300	7799.52	1818	0	12561	Cdh4
2	25611000	25619700	8700	7787.59	1819	0	77058	Ccdc183
4	153787700	153820400	32700	7786.39	1820	0	407793	BC039966
12	87094050	87105950	11900	7781.77	1821	0	64242	Ngb
7	4461050	4477200	16150	7777.34	1822	0	67425	Eps8l1
6	125374400	125388450	14050	7775.68	1823	0	213522	Plekhg6
5	114453700	114481750	28050	7767.98	1824	0	17855	Mvk
4	123318550	123330950	12400	7759.22	1825	0	64059	Oxct2a
7	19018150	19025400	7250	7758.69	1826	0	68188	Sympk
12	79129200	79136000	6800	7758.69	1827	0	11847	Arg2
7	82041900	82067450	25550	7758.17	1828	0	434205	Gm20744
2	121802300	121814000	11700	7754.08	1829	0	228564	Frmd5
16	20725700	20740850	15150	7754.08	1830	0	21832	Thpo
5	119619000	119628800	9800	7748.78	1831	0	330183	Gm16063
13	43774650	43793200	18550	7744.15	1832	0	12522	Cd83
2	54429850	54441300	11450	7740.23	1833	0	271786	Galnt13
16	94989250	95005150	15900	7738.73	1834	0	16522	Kcnj6
5	99720900	99735500	14600	7733.24	1835	0	330133	Gm38413
15	84063350	84078050	14700	7730.6	1836	0	77627	Efcab6
13	55898200	55927550	29350	7727.27	1837	0	18740	Pitx1
4	123231550	123244950	13400	7713.05	1838	0	56198	Heyl
9	67828050	67836750	8700	7712.98	1839	0	244911	C2cd4a
14	33307650	33325850	18200	7711.68	1840	0	239027	Arhgap22
8	94516750	94541900	25150	7710.76	1841	0	434341	Nlrc5
4	132971350	132980750	9400	7699.22	1842	0	14191	Fgr
1	36296150	36317500	21350	7697.65	1843	0	214855	Arid5a
8	10142550	10158250	15700	7684.08	1844	0	244281	Myo16
18	80486850	80502000	15150	7677.78	1845	0	67655	Ctdp1
19	23886250	23900050	13800	7677.77	1846	0	319924	Apba1
10	70239550	70246750	7200	7669.84	1847	0	66859	Slc16a9
6	82399150	82407150	8000	7669.05	1848	0	21336	Tacr1
5	53206250	53215300	9050	7657.38	1849	0	231238	Sel1l3
7	46174200	46192300	18100	7656.54	1850	0	20927	Abcc8
10	43681900	43700200	18300	7649.52	1851	0	414125	F930017D23Rik
15	6868250	6878350	10100	7646.94	1852	0	18414	Osmr
15	31291650	31300050	8400	7643.3	1853	0	67434	Ankrd33b
1	172045200	172062850	17650	7642.4	1854	0	18071	Nhlh1
6	145070900	145080450	9550	7634.21	1855	0	12035	Bcat1
9	106644650	106663400	18750	7628.9	1856	0	21767	Tex264
9	98030850	98039100	8250	7623.47	1857	0	64085	Clstn2
15	100867400	100880700	13300	7622.49	1858	0	20273	Scn8a
2	35989350	36015450	26100	7597.15	1859	0	74410	Ttll11
X	99125000	99165100	40100	7592.53	1860	0	13641	Efnb1
10	43012950	43025600	12650	7586.76	1861	0	109205	Sobp
12	105957300	105970950	13650	7584.64	1862	0	22367	Vrk1
4	108028600	108037050	8450	7583.38	1863	0	242608	Podn
1	39644400	39658400	14000	7583.11	1864	0	263764	Creg2
5	112386700	112402250	15550	7571.5	1865	0	72898	Asphd2
17	90450650	90458550	7900	7569.46	1866	0	18189	Nrxn1
8	48838250	48849050	10800	7555.61	1867	0	23965	Tenm3
10	61589850	61606200	16350	7555.04	1868	0	237362	Npffr1
11	34386350	34415150	28800	7553.3	1869	0	94176	Dock2
9	87142400	87147250	4850	7548.43	1870	0	244958	Mrap2
8	114200150	114208750	8600	7546.38	1871	0	270097	Vat1l
7	126038900	126070150	31250	7546.38	1872	0	269994	Gsg1l
5	118996350	119013600	17250	7546.38	1873	0	74627	4930413E15Rik
X	99816200	99829850	13650	7539.46	1874	0	620592	Nalf2
14	60370250	60382800	12550	7533.62	1875	0	72125	Amer2
3	127742600	127760600	18000	7532.53	1876	0	71481	Alpk1
4	140104750	140118000	13250	7521.57	1877	0	230868	Igsf21
7	132138100	132159150	21050	7516.38	1878	0	55987	Cpxm2
1	128588800	128600150	11350	7515.44	1879	0	12767	Cxcr4
1	158352150	158365800	13650	7509.24	1880	0	240843	Brinp2
10	51675000	51681400	6400	7503.22	1881	0	320995	Rfx6
3	37342850	37355700	12850	7494.98	1882	0	14173	Fgf2
3	122038900	122055150	16250	7490.46	1883	0	11304	Abca4
6	63250950	63260900	9950	7486.38	1884	0	14804	Grid2
9	31459550	31468700	9150	7471.16	1885	0	235135	Tmem45b
12	105553250	105567800	14550	7462.32	1886	0	12062	Bdkrb2
18	46194750	46208700	13950	7458.68	1887	0	28105	Trim36
15	84099800	84117250	17450	7447.79	1888	0	75772	Pnpla5
4	131825800	131839250	13450	7445.47	1889	0	19273	Ptpru
13	108210800	108221200	10400	7440.22	1890	0	74559	Elovl7
16	93420850	93437200	16350	7440.04	1891	0	72264	1700029J03Rik
11	118933950	118965750	31800	7434.91	1892	0	52897	Rbfox3
5	53246750	53267800	21050	7432.73	1893	0	66278	Smim20
10	123260050	123269350	9300	7430.99	1894	0	268354	Tafa2
5	118927050	118947350	20300	7430.33	1895	0	74627	4930413E15Rik
6	90453700	90469050	15350	7428.03	1896	0	66277	Klf15
7	96206300	96217250	10950	7423.37	1897	0	23966	Tenm4
X	13214800	13249050	34250	7421.76	1898	0	72122	2010308F09Rik
7	70108050	70126050	18000	7416.91	1899	0	624549	Gm29683
7	107363700	107376250	12550	7407.91	1900	0	60510	Syt9
6	29015200	29032300	17100	7389.13	1901	0	387237	Mir129-1
7	18925900	18938100	12200	7384.81	1902	0	384569	Nova2
8	126291300	126313250	21950	7375.44	1903	0	210027	Slc35f3
2	27881000	27892750	11750	7362.65	1904	0	12831	Col5a1
X	101843500	101856100	12600	7361.76	1905	0	100042480	Nhsl2
9	29958650	29966850	8200	7360.21	1906	0	235106	Ntm
7	144932550	144951550	19000	7338.68	1907	0	12443	Ccnd1
18	72345750	72353850	8100	7338.68	1908	0	13176	Dcc
10	128581100	128591800	10700	7320.97	1909	0	13867	Erbb3
2	29189100	29208050	18950	7319.59	1910	0	171171	Ntng2
4	125227150	125252350	25200	7309.95	1911	0	230738	Zc3h12a
18	36279500	36288250	8750	7309.72	1912	0	19290	Pura
13	51901400	51926400	25000	7308.93	1913	0	23882	Gadd45g
13	13778150	13793100	14950	7303.96	1914	0	17101	Lyst
9	122717000	122737500	20500	7301.76	1915	0	671232	Topaz1
5	118867350	118883850	16500	7301.76	1916	0	74627	4930413E15Rik
2	102538300	102559400	21100	7301.57	1917	0	210622	Pamr1
16	60601950	60607850	5900	7294.92	1918	0	13840	Epha6
13	118709850	118717500	7650	7288.14	1919	0	14165	Fgf10
11	49898450	49905400	6950	7287.03	1920	0	74563	Rasgef1c
17	66443600	66454050	10450	7283.17	1921	0	68617	Mtcl1
1	133344000	133367300	23300	7281.96	1922	0	214253	Etnk2
1	92768300	92793300	25000	7274.06	1923	0	14733	Gpc1
19	36339550	36354400	14850	7273.53	1924	0	76073	Pcgf5
15	83674050	83693850	19800	7269.03	1925	0	64706	Scube1
19	16948800	16963000	14200	7268.85	1926	0	353211	Prune2
12	84693750	84705700	11950	7255.6	1927	0	627191	Syndig1l
11	52274650	52296800	22150	7255.49	1928	0	21414	Tcf7
11	72308200	72323350	15150	7250.72	1929	0	628100	Fbxo39
7	49115450	49134850	19400	7232.52	1930	0	78286	Nav2
4	136415150	136432550	17400	7209.45	1931	0	15552	Htr1d
3	156557400	156568200	10800	7209.45	1932	0	329782	4930570G19Rik
17	8385500	8394350	8850	7201.61	1933	0	21331	T2
2	180210550	180233500	22950	7195.55	1934	0	16776	Lama5
13	92123050	92137100	14050	7194.28	1935	0	19418	Rasgrf2
6	88963400	88984250	20850	7186.85	1936	0	232217	4933427D06Rik
10	23344000	23353350	9350	7181.94	1937	0	14051	Eya4
1	155229350	155248600	19250	7169.44	1938	0	207792	BC034090
X	140274200	140288900	14700	7163.29	1939	0	100499512	Mir3475
5	69336550	69345600	9050	7163.29	1940	0	243043	Kctd8
11	83734300	83755000	20700	7162.07	1941	0	66107	Wfdc21
18	45557000	45564200	7200	7158.24	1942	0	140492	Kcnn2
5	128540150	128556700	16550	7155.25	1943	0	319616	Fzd10os
13	55376250	55385500	9250	7155.09	1944	0	51791	Rgs14
17	29225950	29248150	22200	7152.56	1945	0	240058	Cpne5
14	124189750	124201050	11300	7149.14	1946	0	14169	Fgf14
13	25052450	25063200	10750	7148.95	1947	0	195208	Dcdc2a
11	4262950	4273100	10150	7137.42	1948	0	16878	Lif
8	83869250	83885050	15800	7120.75	1949	0	330814	Adgrl1
16	88286100	88294300	8200	7117.14	1950	0	14805	Grik1
18	35924900	35940500	15600	7112.52	1951	0	74002	Psd2
19	34469750	34479650	9900	7112.46	1952	0	12642	Ch25h
4	125183050	125205400	22350	7107.9	1953	0	230738	Zc3h12a
X	12128500	12143800	15300	7103.29	1954	0	71458	Bcor
5	100840550	100850200	9650	7098.67	1955	0	231510	Gpat3
18	67337150	67350950	13800	7098.66	1956	0	338360	B430212C06Rik
1	132060200	132073750	13550	7097.08	1957	0	213006	Mfsd4a
8	125893200	125901450	8250	7089.44	1958	0	270109	Pcnx2
10	90963950	90970900	6950	7073.39	1959	0	77531	Anks1b
12	109605800	109619600	13800	7072.45	1960	0	75745	Rian
17	24655850	24666500	10650	7066.36	1961	0	381073	Npw
19	6837600	6851600	14000	7064.25	1962	0	78317	Ccdc88b
6	28392600	28404500	11900	7062.18	1963	0	627049	Zfp800
8	125988950	125999050	10100	7057.13	1964	0	16525	Kcnk1
18	67387200	67395850	8650	7057.13	1965	0	67951	Tubb6
11	101172850	101182300	9450	7043.82	1966	0	53321	Cntnap1
10	49779050	49791700	12650	7033.35	1967	0	14806	Grik2
11	28579750	28588300	8550	7031.61	1968	0	216613	Ccdc85a
10	58925450	58947650	22200	7020.6	1969	0	237353	Sh3rf3
1	166040100	166059200	19100	7020.21	1970	0	18986	Pou2f1
7	139145200	139163150	17950	7016.97	1971	0	57740	Stk32c
5	84412000	84422600	10600	7015.41	1972	0	13839	Epha5
2	105212350	105229300	16950	7008.54	1973	0	74088	Them7
18	42893850	42904700	10850	7001.75	1974	0	72930	Ppp2r2b
7	122663950	122687200	23250	6991.96	1975	0	54376	Cacng3
2	21363500	21375900	12400	6983.28	1976	0	241263	Gpr158
15	82985350	83004800	19450	6981.22	1977	0	74039	Nfam1
X	137567800	137575250	7450	6978.67	1978	0	60367	Il1rapl2
9	29407350	29419600	12250	6976.17	1979	0	235106	Ntm
6	89015900	89044050	28150	6969.44	1980	0	232217	4933427D06Rik
11	104603950	104613300	9350	6969.32	1981	0	16416	Itgb3
11	59006050	59040150	34100	6968.08	1982	0	380698	Obscn
11	64430900	64447650	16750	6964.82	1983	0	15478	Hs3st3a1
17	67694900	67708750	13850	6963.62	1984	0	16772	Lama1
4	43511750	43529450	17700	6955.59	1985	0	230099	Car9
11	114009900	114026850	16950	6954.62	1986	0	237979	Sdk2
15	71718600	71732200	13600	6950.98	1987	0	70363	Fam135b
11	5854400	5877950	23550	6948.31	1988	0	18972	Pold2
5	99609900	99617100	7200	6941.86	1989	0	320292	Rasgef1b
10	69393700	69402800	9100	6941.57	1990	0	11735	Ank3
9	28397550	28406100	8550	6938.15	1991	0	330908	Opcml
7	109859700	109870150	10450	6937.12	1992	0	56788	Scube2
2	27132600	27146000	13400	6933.73	1993	0	329371	Dbhos
4	138682650	138697800	15150	6932.51	1994	0	212190	Ubxn10
15	76190900	76215250	24350	6924.03	1995	0	18810	Plec
10	29140550	29150400	9850	6919.91	1996	0	67412	Soga3
4	153346050	153382850	36800	6918.67	1997	0	230959	Ajap1
14	74637650	74647900	10250	6917.25	1998	0	15558	Htr2a
[truncated: 187 more rows]
